# Supplementary material for: Specific enrichment and glycosylation discrepancy profiling of cellular exosomes using a dual-affinity probe
Source: Royal Society of Chemistry journal article supplement (doi:10.1039/d1cc01530c), 2021-01-01
Supplement: d1cc01530c1.xlsx [file d1cc01530c1.xlsx]

## Sheet: protein-quantity
Protein IDs	Protein names	Gene names	Fasta headers	Mol. weight [kDa]	Sequence length	Q-value	Score	LFQ intensity Hela-exo-1	LFQ intensity Hela-exo-2	LFQ intensity Hela-exo-3	LFQ intensity MDA-MB231-exo-1	LFQ intensity MDA-MB231-exo-2	LFQ intensity MDA-MB231-exo-3	LFQ intensity MCF7-exo-1	LFQ intensity MCF7-exo-2	LFQ intensity MCF7-exo-3	id	Peptide IDs	Deamidation (N) site IDs	Oxidation (M) site IDs	Deamidation (N) site positions	Oxidation (M) site positions
O00186	Syntaxin-binding protein 3	STXBP3	sp|O00186|STXB3_HUMAN Syntaxin-binding protein 3 OS=Homo sapiens OX=9606 GN=STXBP3 PE=1 SV=2	67.764	592	0	39.093	31114000	41114000	30114000	46453000	16884000	40000000	0	0	0	113	531;3970;4193;8543;8833;10218	198	41	416	51
O00339	Matrilin-2	MATN2	sp|O00339|MATN2_HUMAN Matrilin-2 OS=Homo sapiens OX=9606 GN=MATN2 PE=1 SV=4	106.84	956	0	27.397	0	0	0	0	0	0	16360000	36416000	30409000	119	499;4126;4966;4996;10534;11508;12261;12537	199		221
O00391	Sulfhydryl oxidase 1	QSOX1	sp|O00391|QSOX1_HUMAN Sulfhydryl oxidase 1 OS=Homo sapiens OX=9606 GN=QSOX1 PE=1 SV=3	82.577	747	0	81.384	0	0	0	126840000	138020000	126870000	167520000	97770000	127740000	121	586;1559;2749;3092;3996;4767;5342;6028;6815;8823;8826;9029;9615;10111;10395;12444	200;201		130;243
O00468	Agrin;Agrin N-terminal 110 kDa subunit;Agrin C-terminal 110 kDa subunit;Agrin C-terminal 90 kDa fragment;Agrin C-terminal 22 kDa fragment	AGRN	sp|O00468|AGRIN_HUMAN Agrin OS=Homo sapiens OX=9606 GN=AGRN PE=1 SV=6	217.32	2068	0	323.31	297980000	290980000	257980000	713620000	720250000	713780000	290760000	491510000	401430000	126	16;217;666;688;759;918;1026;1378;1390;1464;1465;1575;1624;2026;2246;2285;2441;2568;2577;3006;3007;3303;3389;3799;4195;4252;4305;4312;4405;4512;4513;4664;5054;5353;5354;6209;6609;7026;7430;8289;8756;9139;9364;9719;9831;9885;10012;10136;10155;10382;10407;10808;10809;11087;11320;11347;11424;11875;12211;12362;12363;12432;12661;13045;13146;13479	202;203;204;205;206;207	45	130;135;777;932;1412;1641	133
O00469	Procollagen-lysine,2-oxoglutarate 5-dioxygenase 2	PLOD2	sp|O00469|PLOD2_HUMAN Procollagen-lysine,2-oxoglutarate 5-dioxygenase 2 OS=Homo sapiens OX=9606 GN=PLOD2 PE=1 SV=2	84.685	737	0	34.962	0	0	0	20321000	28584000	28927000	0	0	0	127	2336;2859;2978;3474;3962;7561;7562;8032;10719;13697	208;209;210;211;212;213;214		209;520;522;527;528;696;725
O00560	Syntenin-1	SDCBP	sp|O00560|SDCB1_HUMAN Syntenin-1 OS=Homo sapiens OX=9606 GN=SDCBP PE=1 SV=1	32.444	298	0	323.31	206300000	806300000	1206300000	5783300000	837000000	5784500000	148500000	349040000	398980000	132	868;869;2027;2117;2118;2119;2120;2128;2129;2130;3126;3127;3352;3353;3354;5939;7392;8254;8297;8810;9349;9454;10527;10698;10749;10750;11572;12241;12546;12683	216;217;218;219;220;221;222;223	46;47	99;134;144;162;165;215;230;242	57;270
O00754	Lysosomal alpha-mannosidase;Lysosomal alpha-mannosidase A peptide;Lysosomal alpha-mannosidase B peptide;Lysosomal alpha-mannosidase C peptide;Lysosomal alpha-mannosidase D peptide;Lysosomal alpha-mannosidase E peptide	MAN2B1	sp|O00754|MA2B1_HUMAN Lysosomal alpha-mannosidase OS=Homo sapiens OX=9606 GN=MAN2B1 PE=1 SV=3	113.74	1011	0	112.19	0	0	0	0	0	0	159560000	109810000	189780000	138	853;1880;1922;1923;2844;3583;5005;6995;7010;7019;7669;7772;8162;8505;8991;11740;11793	224;225;226;227;228		158;310;367;692;766
O14672	Disintegrin and metalloproteinase domain-containing protein 10	ADAM10	sp|O14672|ADA10_HUMAN Disintegrin and metalloproteinase domain-containing protein 10 OS=Homo sapiens OX=9606 GN=ADAM10 PE=1 SV=1	84.141	748	0	323.31	29229000	59229000	49229000	192270000	395920000	302360000	191980000	102140000	109120000	148	495;1159;1595;2383;2540;3032;5134;5713;5714;5799;6453;7722;8095;8326;8891;8892;9176;9177;9393;10023;10068;10702;11571;12979;13561	231;232;233;234;235;236		278;428;439;537;551;564
O14786	Neuropilin-1	NRP1	sp|O14786|NRP1_HUMAN Neuropilin-1 OS=Homo sapiens OX=9606 GN=NRP1 PE=1 SV=3	103.13	923	0	112.48	0	0	0	50666000	61229000	70679000	36239000	39295000	26289000	153	2527;2555;3718;4145;4376;5435;5893;6514;8990;9873;10479;11011;11401	239;240;241		150;261;521
O14817	Tetraspanin-4	TSPAN4	sp|O14817|TSN4_HUMAN Tetraspanin-4 OS=Homo sapiens OX=9606 GN=TSPAN4 PE=1 SV=1	26.118	238	0	95.245	87910000	137910000	187910000	91060000	139280000	131090000	0	0	0	154	875;1353;4251;6261;12836;13451	242;243;244		136;152;161
O15031	Plexin-B2	PLXNB2	sp|O15031|PLXB2_HUMAN Plexin-B2 OS=Homo sapiens OX=9606 GN=PLXNB2 PE=1 SV=3	205.12	1838	0	72.003	61888000	41888000	47888000	0	0	0	0	0	0	165	769;825;1754;5868;7265;7937;8708;9602;10033;10236;10324;10552;11343;12454;13165;13298	245;246;247;248;249;250;251;252	48	127;528;733;759;844;1002;1068;1099	529
O15118	Niemann-Pick C1 protein	NPC1	sp|O15118|NPC1_HUMAN NPC intracellular cholesterol transporter 1 OS=Homo sapiens OX=9606 GN=NPC1 PE=1 SV=2	142.17	1278	0	49.62	0	0	0	0	0	0	50360000	59451000	49440000	166	2204;9313;10566;12245;12390	253;254;255		598;961;968
O15230	Laminin subunit alpha-5	LAMA5	sp|O15230|LAMA5_HUMAN Laminin subunit alpha-5 OS=Homo sapiens OX=9606 GN=LAMA5 PE=1 SV=8	399.73	3695	0	323.31	208650000	388650000	288650000	33810000	336910000	303880000	393420000	319900000	313850000	172	167;361;462;476;497;553;824;900;975;1069;1178;1179;1201;1259;1302;1358;1364;1370;1380;1408;1428;1460;1468;1662;1740;1741;1860;1882;1974;1975;2021;2042;2061;2137;2172;2178;2363;2457;2781;2911;2951;3260;3330;3359;3736;3737;3796;3889;3900;4163;4267;4395;4414;4437;4460;4461;4537;4603;4668;4724;4839;4840;5155;5194;5614;5629;5819;5931;5986;6151;6551;6687;6779;6846;6869;7172;7227;7251;7479;7507;7611;765…	256;257;258;259;260;261;262;263;264;265;266;267;268;269;270;271;272;273;274;275;276;277	49;50;51	95;110;227;236;243;479;900;921;1330;2019;2196;2209;2303;2423;2501;2568;2707;3107;3209;3257;3287;3398	2200;2293;3125
O15394	Neural cell adhesion molecule 2	NCAM2	sp|O15394|NCAM2_HUMAN Neural cell adhesion molecule 2 OS=Homo sapiens OX=9606 GN=NCAM2 PE=1 SV=2	93.045	837	0	62.491	0	0	0	100171000	93008000	90190000	0	0	0	176	1832;1833;3427;3547;4425;6460;8153;8404;10383;10495;13007;13698	278;279;280;281;282;283;284		219;406;419;445;448;474;562
O43278	Kunitz-type protease inhibitor 1	SPINT1	sp|O43278|SPIT1_HUMAN Kunitz-type protease inhibitor 1 OS=Homo sapiens OX=9606 GN=SPINT1 PE=1 SV=2	58.397	529	0	9.1422	0	0	0	59615000	50075000	29625000	0	0	0	187	1619;9055;11834	289;290		288;289
O43324	Eukaryotic translation elongation factor 1 epsilon-1	EEF1E1	sp|O43324|MCA3_HUMAN Eukaryotic translation elongation factor 1 epsilon-1 OS=Homo sapiens OX=9606 GN=EEF1E1 PE=1 SV=1	19.81	174	0	18.978	0	0	0	0	0	0	19676000	17703000	10700000	190	9479;9501;13110;13111;13297	292		37
O43570	Carbonic anhydrase 12	CA12	sp|O43570|CAH12_HUMAN Carbonic anhydrase 12 OS=Homo sapiens OX=9606 GN=CA12 PE=1 SV=1	39.45	354	0	35.789	0	0	0	20934000	21202000	28940000	0	0	0	198	6757;7652;9076	294		80
O43657	Tetraspanin-6	TSPAN6	sp|O43657|TSN6_HUMAN Tetraspanin-6 OS=Homo sapiens OX=9606 GN=TSPAN6 PE=1 SV=1	27.563	245	0	166.87	0	0	0	457560000	421440000	410650000	20797000	19828000	19024000	204	707;1477;2255;5774;7002;9777;10209;10485;10486	295		134
O43688	Lipid phosphate phosphohydrolase 2	PPAP2C	sp|O43688|PLPP2_HUMAN Phospholipid phosphatase 2 OS=Homo sapiens OX=9606 GN=PLPP2 PE=1 SV=1	32.573	288	0	9.6919	0	0	0	21592000	68993000	27597000	0	0	0	206	1013;4346;7882;7883;12785	296		139
O43854	EGF-like repeat and discoidin I-like domain-containing protein 3	EDIL3	sp|O43854|EDIL3_HUMAN EGF-like repeat and discoidin I-like domain-containing protein 3 OS=Homo sapiens OX=9606 GN=EDIL3 PE=1 SV=1	53.764	480	0	323.31	1652200000	2131100000	1131100000	0	0	0	803510000	894880000	694720000	215	678;679;1443;1617;1849;1850;3894;3995;4259;4333;4334;4612;5257;5258;5424;5425;5628;5921;6142;6262;6492;6913;6914;6915;8256;8257;8356;8518;8808;9239;9904;10432;11665;11666;12360;12361;12588;12783;12784;13067;13068;13075;13076;13417	297;298;299;300;301;302;303	53	112;130;140;283;372;414;439	259
O43897	Tolloid-like protein 1	TLL1	sp|O43897|TLL1_HUMAN Tolloid-like protein 1 OS=Homo sapiens OX=9606 GN=TLL1 PE=1 SV=1	114.71	1013	0	2.7601	2352500	4352500	8352500	0	0	0	0	0	0	217	5982;6249;10276	304		390
O60488	Long-chain-fatty-acid--CoA ligase 4	ACSL4	sp|O60488|ACSL4_HUMAN Long-chain-fatty-acid--CoA ligase 4 OS=Homo sapiens OX=9606 GN=ACSL4 PE=1 SV=2	79.187	711	0	43.93	112420000	271840000	122420000	0	0	0	0	0	0	221	610;2192;2385;2386;6411;7354;7746;10289;11147	307		194
O60568	Procollagen-lysine,2-oxoglutarate 5-dioxygenase 3	PLOD3	sp|O60568|PLOD3_HUMAN Multifunctional procollagen lysine hydroxylase and glycosyltransferase LH3 OS=Homo sapiens OX=9606 GN=PLOD3 PE=1 SV=1	84.784	738	0	103.45	18748000	11748000	5748000	122420000	274360000	251900000	9362000	14384000	4381000	223	1255;1822;2953;3472;4139;4232;4471;4472;5370;7459;7581;10144;11670;12345;12500;13429;13430;13487;13616	308;309;310		63;223;548
O60635	Tetraspanin-1	TSPAN1	sp|O60635|TSN1_HUMAN Tetraspanin-1 OS=Homo sapiens OX=9606 GN=TSPAN1 PE=1 SV=2	26.301	241	0	94.081	0	0	0	14384000	68993000	61373000	0	0	0	225	448;2265;6163;12278	311		141
O75054	Immunoglobulin superfamily member 3	IGSF3	sp|O75054|IGSF3_HUMAN Immunoglobulin superfamily member 3 OS=Homo sapiens OX=9606 GN=IGSF3 PE=2 SV=3	135.19	1194	0	323.31	7988100	68993000	7948100	274360000	416580000	92840000	0	0	0	241	231;282;1027;1088;1494;1495;1539;1631;1671;2722;2981;3563;3654;5156;6168;6496;6797;6798;7080;7237;7974;8033;8076;8077;8880;9318;9529;9746;9789;10311;10917;10974;11234;11363;11392;11703;11902;11909;11959;11960;12046;12155;12297;12401;12718;12899	317;318;319;320;321;322;323;324		43;101;655;700;825;842;961;1077
O75083	WD repeat-containing protein 1	WDR1	sp|O75083|WDR1_HUMAN WD repeat-containing protein 1 OS=Homo sapiens OX=9606 GN=WDR1 PE=1 SV=4	66.193	606	0	234.29	0	0	0	88814000	92840000	88032000	112450000	312930000	803510000	242	2274;3349;4114;4408;5255;5540;6007;6891;7229;8266;8564;8856;9040;10555;10556;11188;13238	325		331
O75340	Programmed cell death protein 6	PDCD6	sp|O75340|PDCD6_HUMAN Programmed cell death protein 6 OS=Homo sapiens OX=9606 GN=PDCD6 PE=1 SV=1	21.868	191	0	161.17	1052200000	1652200000	1692200000	99652000	88814000	90671000	0	0	0	248	138;428;429;2001;4426;4427;7905;8010;9359;10123;10473;10539;12071;13610	327;328	61	54;106	109
O75369	Filamin-B	FLNB	sp|O75369|FLNB_HUMAN Filamin-B OS=Homo sapiens OX=9606 GN=FLNB PE=1 SV=2	278.16	2602	0	274.85	0	0	0	15622400	5674600	7623600	205170000	295620000	312930000	253	395;454;573;574;904;1492;1493;3121;3714;4253;5126;5148;5349;5352;5415;5780;6237;6474;6751;7194;7267;7269;7474;8185;8190;9217;9514;9598;9952;10820;10822;11442;12198;12248;12306;12603;12605;12657;12722;12798;13129;13150;13318;13549;13550;13584;13782;13819;13848	330		1987
O94907	Dickkopf-related protein 1	DKK1	sp|O94907|DKK1_HUMAN Dickkopf-related protein 1 OS=Homo sapiens OX=9606 GN=DKK1 PE=1 SV=1	28.671	266	0	11.135	0	0	0	0	0	0	3361300	8974200	8372700	281	1727;2565;4789;5767;7255	343		256
O95084	Serine protease 23	PRSS23	sp|O95084|PRS23_HUMAN Serine protease 23 OS=Homo sapiens OX=9606 GN=PRSS23 PE=1 SV=1	43.001	383	0	74.191	7988100	67624000	7624000	0	0	0	108510000	208830000	88800000	285	1669;3273;3624;3797;4324;4367;5152;6324;7985;7986	346;347	62;63	207;349	213;217
O95274	Ly6/PLAUR domain-containing protein 3	LYPD3	sp|O95274|LYPD3_HUMAN Ly6/PLAUR domain-containing protein 3 OS=Homo sapiens OX=9606 GN=LYPD3 PE=1 SV=2	35.97	346	0	77.968	0	0	0	94370000	206270000	108510000	0	0	0	287	651;1417;1710;2296;3841;4229;8929;10795	348;349;350;351;352;353;354		118;129;136;163;176;183;227
O95297	Myelin protein zero-like protein 1	MPZL1	sp|O95297|MPZL1_HUMAN Myelin protein zero-like protein 1 OS=Homo sapiens OX=9606 GN=MPZL1 PE=1 SV=1	29.082	269	0	110.84	6691000	92691000	42691000	96480000	90376000	36500000	0	0	0	288	1533;1534;2279;2630;2631;6612;9068;10707;10708	355;356		50;130
O95347	Structural maintenance of chromosomes protein 2	SMC2	sp|O95347|SMC2_HUMAN Structural maintenance of chromosomes protein 2 OS=Homo sapiens OX=9606 GN=SMC2 PE=1 SV=2	135.65	1197	0	18.849	0	0	0	0	0	0	19440000	13461000	5459000	290	4794;4945;12180	357		903
O95858	Tetraspanin-15	TSPAN15	sp|O95858|TSN15_HUMAN Tetraspanin-15 OS=Homo sapiens OX=9606 GN=TSPAN15 PE=1 SV=1	33.165	294	0	15.211	0	0	0	18491000	28756000	20497000	0	0	0	308	3655;9114;9207	360		189
P00533	Epidermal growth factor receptor	EGFR	sp|P00533|EGFR_HUMAN Epidermal growth factor receptor OS=Homo sapiens OX=9606 GN=EGFR PE=1 SV=2	134.28	1210	0	125.85	36496000	68496000	58496000	0	0	0	0	0	0	317	1136;1803;2107;2493;2664;3946;4344;4345;4474;4852;6118;6670;6671;7726;8054;8299;8711;9302;9325;11302;11557;11605;12019;12214	361;362;363;364;365;366;367;368;369;370		128;175;338;352;361;413;422;444;568;603
P00736	Complement C1r subcomponent;Complement C1r subcomponent heavy chain;Complement C1r subcomponent light chain	C1R	sp|P00736|C1R_HUMAN Complement C1r subcomponent OS=Homo sapiens OX=9606 GN=C1R PE=1 SV=2	80.118	705	0	15.929	42691000	21411000	36496000	0	0	0	0	0	0	320	2483;2591;4033;8765	373		514
P00750	Tissue-type plasminogen activator;Tissue-type plasminogen activator chain A;Tissue-type plasminogen activator chain B	PLAT	sp|P00750|TPA_HUMAN Tissue-type plasminogen activator OS=Homo sapiens OX=9606 GN=PLAT PE=1 SV=1	62.916	562	0	226.98	0	0	0	0	0	0	476210000	176480000	208830000	322	917;1113;1455;3450;3540;4043;4595;4638;5550;7163;8552;10422;11195;11845;11994;12086;13210;13307;13611;13798	375;376;377;378		152;177;219;483
P01011	Alpha-1-antichymotrypsin;Alpha-1-antichymotrypsin His-Pro-less	SERPINA3	sp|P01011|AACT_HUMAN Alpha-1-antichymotrypsin OS=Homo sapiens OX=9606 GN=SERPINA3 PE=1 SV=2	47.65	423	0	17.456	0	0	0	20690000	25929000	15696000	0	0	0	324	1238;7322;8937;13813	379;380		186;271
P01023	Alpha-2-macroglobulin	A2M	sp|P01023|A2MG_HUMAN Alpha-2-macroglobulin OS=Homo sapiens OX=9606 GN=A2M PE=1 SV=3	163.29	1474	0	323.31	95530000	755530000	35530000	0	0	0	0	0	0	325	97;340;341;342;356;708;709;1175;1316;1903;2004;2071;2187;2919;3077;3322;3581;3618;3910;3911;4079;4096;4097;4406;4692;5176;5240;5241;5524;6747;6762;7256;7494;7523;7721;7923;7926;8131;8132;8314;8603;8663;8746;8747;9094;9095;9453;9515;9650;9680;9710;10195;10259;10425;10577;10655;10660;10810;10978;10979;11013;11014;11250;11364;11365;11391;11478;11479;11982;11983;12411;12997;13028;13029;13065;13225;13…	18;381;382;383;384;385;386	7	247;816;851;869;1077;1413;1424	1385
P01024	Complement C3;Complement C3 beta chain;C3-beta-c;Complement C3 alpha chain;C3a anaphylatoxin;Acylation stimulating protein;Complement C3b alpha chain;Complement C3c alpha chain fragment 1;Complement C3dg fragment;Complement C3g fragment;Complement C3d fragment;Complement C3f fragment;Complement C3c alpha chain fragment 2	C3	sp|P01024|CO3_HUMAN Complement C3 OS=Homo sapiens OX=9606 GN=C3 PE=1 SV=2	187.15	1663	0	31.948	0	0	0	0	0	0	45298000	25337000	20333000	326	131;3735;4660;5314;6117;6288;7740;8092;8766;10458;12025;13864	387		85
P01130	Low-density lipoprotein receptor	LDLR	sp|P01130|LDLR_HUMAN Low-density lipoprotein receptor OS=Homo sapiens OX=9606 GN=LDLR PE=1 SV=1	95.375	860	0	69.912	39039000	30039000	95530000	0	0	0	76548000	56635000	26625000	332	451;1222;6822;8028;8751;9289;11934	390		657
P01889	HLA class I histocompatibility antigen, B-7 alpha chain	HLA-B	sp|P01889|HLAB_HUMAN HLA class I histocompatibility antigen, B alpha chain OS=Homo sapiens OX=9606 GN=HLA-B PE=1 SV=3	40.46	362	0	63.824	0	0	0	0	0	0	22827000	42893000	2885000	336	206;1323;1659;3300;4773;11166;13811	396		110
P02751	Fibronectin;Anastellin;Ugl-Y1;Ugl-Y2;Ugl-Y3	FN1	sp|P02751|FINC_HUMAN Fibronectin OS=Homo sapiens OX=9606 GN=FN1 PE=1 SV=5	272.32	2477	0	323.31	377000	4377000	8377000	142620000	43940000	92650000	3163100000	1160500000	160300000	342	134;953;1138;1145;1362;1363;1386;1393;1418;1450;1524;1689;1930;2024;2025;2110;2174;2175;2377;2433;2465;2655;2721;3001;3002;3171;3187;3210;3358;3448;3681;3683;3815;3892;3955;3956;3994;4053;4054;4220;4261;4339;4340;4830;4909;5135;5188;5256;5390;5809;5906;5907;5950;6027;6953;7214;7412;8075;8525;8985;8986;9042;9145;9146;9182;9367;9368;9397;9448;9449;9474;9527;9891;9998;10001;10002;10294;10346;11005;1…	398;399;400;401;402;403;404;405;406;407;408;409;410;411;412;413;414;415;416;417;418;419	67;68;69;70	55;172;263;414;416;427;428;430;501;528;542;649;1007;1291;1502;1523;1647;1671;1943;2345;2361;2372	320;463;540;1639
P02768	Serum albumin	ALB	sp|P02768|ALBU_HUMAN Albumin OS=Homo sapiens OX=9606 GN=ALB PE=1 SV=2;	69.366	609	0	3.0215	61900000	161900000	91900000	388110000	189860000	98150000	43075000	22827000	49134000	40	1346;1356;6568;6703;7978;8196;13687;13688
P04004	Vitronectin;Vitronectin V65 subunit;Vitronectin V10 subunit;Somatomedin-B	VTN	sp|P04004|VTNC_HUMAN Vitronectin OS=Homo sapiens OX=9606 GN=VTN PE=1 SV=1	54.305	478	0	67.027	51240000	121240000	81240000	0	0	0	0	0	0	346	2247;2249;2974;3309;3310;4462;6022;8332;8824;9779	176;424		169;242
P04062	Glucosylceramidase	GBA	sp|P04062|GLCM_HUMAN Lysosomal acid glucosylceramidase OS=Homo sapiens OX=9606 GN=GBA PE=1 SV=3	59.716	536	0	49.534	0	0	0	0	0	0	2653000	30703000	32698000	348	1147;1889;2233;3982;7091;8731;11180;13195	425;426;427		131;141;309
P04406	Glyceraldehyde-3-phosphate dehydrogenase	GAPDH	sp|P04406|G3P_HUMAN Glyceraldehyde-3-phosphate dehydrogenase OS=Homo sapiens OX=9606 GN=GAPDH PE=1 SV=3	36.053	335	0	323.31	725690000	925690000	425690000	2152600000	1163300000	1652800000	82350000	843650000	443500000	358	40;262;263;357;358;3395;3789;4156;5517;5564;7023;7024;7338;7339;8026;8027;8137;8138;8139;9370;10107;10108;11995;12236;12237;12452;12518;12524;12525;12545;12859;12860;13152;13153;13333	433;434;435;436	77;78;79;80;81;82	9;64;70;167	43;46;105;130;175;331
P05023	Sodium/potassium-transporting ATPase subunit alpha-1	ATP1A1	sp|P05023|AT1A1_HUMAN Sodium/potassium-transporting ATPase subunit alpha-1 OS=Homo sapiens OX=9606 GN=ATP1A1 PE=1 SV=1	112.89	1023	0	323.31	1516900000	116900000	916900000	1176400000	2152600000	1576700000	65350000	436020000	235950000	366	124;157;158;159;185;1183;1214;1215;1487;1687;1855;1971;2056;2942;3163;3164;3165;4031;4188;4662;4663;5513;5514;5961;6057;6750;7293;7306;7639;8527;8528;8561;8562;8629;8630;8851;8914;8943;9025;9172;9337;9338;9443;9444;9987;9999;10812;11883;12246;12260;12539;13350;13351;13587;13752	440	84	209	178
P05026	Sodium/potassium-transporting ATPase subunit beta-1	ATP1B1	sp|P05026|AT1B1_HUMAN Sodium/potassium-transporting ATPase subunit beta-1 OS=Homo sapiens OX=9606 GN=ATP1B1 PE=1 SV=1	35.061	303	0	116.4	79815000	99815000	9815000	7994000	18625000	68008000	8384000	38443000	28436000	367	584;1310;1311;1597;2548;3438;3439;11175;11369;12177;12662;13618;13619;13674;13675;13715	441;442;443	85	158;193;265	202
P05106	Integrin beta-3	ITGB3	sp|P05106|ITB3_HUMAN Integrin beta-3 OS=Homo sapiens OX=9606 GN=ITGB3 PE=1 SV=2	87.057	788	0	28.52	38784000	32784000	12784000	0	0	0	0	0	0	370	2164;6816;8717	445		680
P05121	Plasminogen activator inhibitor 1	SERPINE1	sp|P05121|PAI1_HUMAN Plasminogen activator inhibitor 1 OS=Homo sapiens OX=9606 GN=SERPINE1 PE=1 SV=1	45.059	402	0	243.95	0	0	0	0	0	0	67520000	638500000	438380000	371	2812;3147;3148;3412;3527;3818;3819;4311;4343;5027;5279;6518;8157;8178;8295;9290;9438;9717;11786;12367;12368	446;447;448	87;88;89	195;232;288	94;106;289
P05187	Alkaline phosphatase, placental type;Alkaline phosphatase, placental-like	ALPP;ALPPL2	sp|P05187|PPB1_HUMAN Alkaline phosphatase, placental type OS=Homo sapiens OX=9606 GN=ALPP PE=1 SV=2;sp|P10696|PPBN_HUMAN Alkaline phosphatase, germ cell type OS=Homo sapiens OX=9606 GN=ALPG PE=2 SV=4	57.953	535	0	59.965	436130000	236130000	296130000	0	0	0	0	0	0	374	413;1653;2131;3522;3977;4548;6437;8958;9654;12901;13858	449;450		144;271
P05362	Intercellular adhesion molecule 1	ICAM1	sp|P05362|ICAM1_HUMAN Intercellular adhesion molecule 1 OS=Homo sapiens OX=9606 GN=ICAM1 PE=1 SV=2	57.825	532	0	72.423	192010000	142010000	42010000	0	0	0	0	0	0	376	850;851;852;1092;1726;2788;4074;6730;6958;7664;9822;9833;10385;11073;11370;12656	454;455;456;457;458;459		145;183;202;267;385;406
P05387	60S acidic ribosomal protein P2	RPLP2	sp|P05387|RLA2_HUMAN 60S acidic ribosomal protein P2 OS=Homo sapiens OX=9606 GN=RPLP2 PE=1 SV=1	11.665	115	0	62.016	52545000	39545000	32545000	0	0	0	55275000	75391000	7377000	378	5579;6180;6325;6884;6885;8857;12554;13833	460		47
P05556	Integrin beta-1	ITGB1	sp|P05556|ITB1_HUMAN Integrin beta-1 OS=Homo sapiens OX=9606 GN=ITGB1 PE=1 SV=2	88.414	798	0	323.31	8398000	78398000	28398000	68110000	159580000	98140000	201000000	301460000	101410000	381	233;336;1394;1827;1828;2007;2144;2145;3275;3551;3552;3853;4127;4807;5395;5801;5831;6152;6157;6158;6194;6231;6577;7135;7580;7870;7913;7918;7919;8829;8830;8917;9059;9257;9258;9791;9824;9917;10224;10664;11171;11172;12030	461;462;463;464;465;466;467;468;469;470;471;472;473		50;92;94;212;227;329;403;406;411;481;520;528;669
P05783	Keratin, type I cytoskeletal 18	KRT18	sp|P05783|K1C18_HUMAN Keratin, type I cytoskeletal 18 OS=Homo sapiens OX=9606 GN=KRT18 PE=1 SV=2	48.057	430	0	323.31	0	0	0	309620000	517140000	809790000	13142000	23178000	239174000	383	946;995;1062;2253;2254;2455;4048;4049;4277;5472;5983;6478;6479;6688;6769;6888;7436;7791;7792;8840;8841;9366;9684;9685;9947;10095;10652;12036;12504;12592;12593;12610;13443;13509	83;474;475	90;91	156;180;339	213;335
P05787	Keratin, type II cytoskeletal 8	KRT8	sp|P05787|K2C8_HUMAN Keratin, type II cytoskeletal 8 OS=Homo sapiens OX=9606 GN=KRT8 PE=1 SV=7;;	53.704	483	0	323.31	0	0	0	58090000	664200000	458230000	4912000	1934000	14932000	44	221;996;997;1059;1060;1061;2197;2198;2826;3212;3929;4860;6413;6414;6834;7013;7049;7372;7437;7743;7917;8930;9548;9549;9578;10083;10084;10646;10787;10788;10928;10929;11376;11606;11829;13396;13493	81	15;16;17	272	136;189;406
P06733	Alpha-enolase	ENO1	sp|P06733|ENOA_HUMAN Alpha-enolase OS=Homo sapiens OX=9606 GN=ENO1 PE=1 SV=2	47.168	434	0	266.48	41410000	841410000	541410000	36466000	39805000	68110000	45080000	245460000	145420000	395	128;129;437;1541;1542;3346;3661;3662;4913;5309;5383;6428;6429;6853;6866;7688;10230;10379;10415;10436;10437;10811;12815;13558;13559;13609	490;491;492		140;154;363
P06744	Glucose-6-phosphate isomerase	GPI	sp|P06744|G6PI_HUMAN Glucose-6-phosphate isomerase OS=Homo sapiens OX=9606 GN=GPI PE=1 SV=4	63.146	558	0	78.303	8681000	5681000	58681000	79940000	59676000	52202000	57158000	45080000	50235000	397	74;1243;4858;5608;5717;6189;6317;8046;8047;9007;11421;11422;11423;11567;11620;12235;13274	494;495		386;543
P06756	Integrin alpha-V;Integrin alpha-V heavy chain;Integrin alpha-V light chain	ITGAV	sp|P06756|ITAV_HUMAN Integrin alpha-V OS=Homo sapiens OX=9606 GN=ITGAV PE=1 SV=2	116.04	1048	0	192.24	0	0	0	71736000	79402000	71751000	0	0	0	400	421;815;865;1015;1831;1861;2892;2937;4045;4046;4490;5862;6021;6424;7773;7898;8374;9353;10697;10875;11213;11304;12962	499;500;501;502;503;504;505;506		74;488;615;704;874;943;945;1041
P07093	Glia-derived nexin	SERPINE2	sp|P07093|GDN_HUMAN Glia-derived nexin OS=Homo sapiens OX=9606 GN=SERPINE2 PE=1 SV=1	44.002	398	0	26.877	0	0	0	0	0	0	48401000	8445000	28440000	403	596;3664;3665;5026;5344;8158;8679;10946;11001;11002	508		118
P07339	Cathepsin D;Cathepsin D light chain;Cathepsin D heavy chain	CTSD	sp|P07339|CATD_HUMAN Cathepsin D OS=Homo sapiens OX=9606 GN=CTSD PE=1 SV=1	44.552	412	0	239.18	5872000	10872000	60872000	300220000	353470000	150300000	691650000	622600000	322490000	409	1341;2012;2506;2507;3292;4526;4527;5872;6116;7419;7420;7969;7970;8100;8101;9316;9620;9621;9728;9729;9730;10088;11622;11728;12407;13013;13794;13869;13880	510;511	93	209;263	36
P07437	Tubulin beta chain	TUBB	sp|P07437|TBB5_HUMAN Tubulin beta chain OS=Homo sapiens OX=9606 GN=TUBB PE=1 SV=2	49.67	444	0	121.57	58740000	158740000	358740000	388530000	291200000	88590000	29980000	220320000	290280000	412	785;3103;3531;3532;3723;4121;4122;5795;5814;5878;5879;6372;6904;7224;8068;8069;8310;8311;8312;8532;9017;9163;10448;11272;12968;13685	432;512	76;94;95;96	226;370	233;321;323;363
P07602	Prosaposin;Saposin-A;Saposin-B-Val;Saposin-B;Saposin-C;Saposin-D	PSAP	sp|P07602|SAP_HUMAN Prosaposin OS=Homo sapiens OX=9606 GN=PSAP PE=1 SV=2	58.112	524	0	323.31	387250000	287250000	187250000	176600000	108240000	170640000	552560000	453250000	53170000	413	1401;1402;1665;1666;2244;2245;2620;2621;2670;2671;3855;3934;4809;4841;4842;4956;5382;6298;7280;7281;7696;8125;8946;8947;9166;9244;9310;9385;9547;10300;10703;11256;11286;11754;11755;11756	513;514;515;516;517;518;519;520;521	97;98;99;100;101;102;103	80;101;149;215;243;331;332;422;426	76;102;125;237;255;256;257
P07686	Beta-hexosaminidase subunit beta;Beta-hexosaminidase subunit beta chain B;Beta-hexosaminidase subunit beta chain A	HEXB	sp|P07686|HEXB_HUMAN Beta-hexosaminidase subunit beta OS=Homo sapiens OX=9606 GN=HEXB PE=1 SV=3	63.111	556	0	57.188	0	0	0	0	0	0	59436000	50513000	5504000	414	2660;3525;4520;4564;6394;6862;6984;8556;8557;8582;11623;12633;13346	522;523		84;327
P07814	Bifunctional glutamate/proline--tRNA ligase;Glutamate--tRNA ligase;Proline--tRNA ligase	EPRS	sp|P07814|SYEP_HUMAN Bifunctional glutamate/proline--tRNA ligase OS=Homo sapiens OX=9606 GN=EPRS1 PE=1 SV=5	170.59	1512	0	299.44	8250000	28250000	48250000	48340000	149720000	188380000	60690000	120880000	322490000	417	66;549;893;2968;3243;3286;3287;3539;4540;5696;5697;5987;6177;7650;7651;7981;8082;9092;10746;11153;11471;11502;11538;11943;12112;12189;12506;12530;12658;13135;13136;13327;13724	524		851
P07858	Cathepsin B;Cathepsin B light chain;Cathepsin B heavy chain	CTSB	sp|P07858|CATB_HUMAN Cathepsin B OS=Homo sapiens OX=9606 GN=CTSB PE=1 SV=3	37.821	339	0	200.93	153590000	103590000	83590000	52338000	82824000	42349000	83740000	865060000	364910000	418	2038;2952;4413;5181;5182;5264;5635;6263;6925;8814;9215;9216;9402;10478;10949	525;526;527	104;105	38;192;246	274;275
P07900	Heat shock protein HSP 90-alpha	HSP90AA1	sp|P07900|HS90A_HUMAN Heat shock protein HSP 90-alpha OS=Homo sapiens OX=9606 GN=HSP90AA1 PE=1 SV=5	84.659	732	0	154.12	15520000	95520000	115520000	53080000	154500000	93110000	37100000	137310000	197280000	419	198;720;1951;2002;2052;2549;2728;2784;2785;2864;4712;4857;4881;4882;4941;5018;5673;6301;6302;7148;7149;8201;8202;9513;9805;10729;10730;11116;11338;12342;12533;12534;13507;13593;13594;13879	528;529		318;609
P07942	Laminin subunit beta-1	LAMB1	sp|P07942|LAMB1_HUMAN Laminin subunit beta-1 OS=Homo sapiens OX=9606 GN=LAMB1 PE=1 SV=2	198.04	1786	0	323.31	99310000	199310000	129310000	14085000	64215000	15088000	166170000	266430000	196400000	421	95;96;141;258;525;807;1229;2343;2719;2730;2733;2757;2758;2759;2973;3017;4137;4270;4614;4758;4759;5835;6046;6047;6073;6672;6742;7258;7309;7416;7908;7909;7910;7998;8322;8358;8359;8360;8698;8790;9388;9671;9774;9920;10643;11419;11653;12303;12781;12838;13648;13649;13856	530;531;532;533;534;535;536;537		677;1195;1279;1336;1343;1487;1542;1643
P07947	Tyrosine-protein kinase Yes	YES1	sp|P07947|YES_HUMAN Tyrosine-protein kinase Yes OS=Homo sapiens OX=9606 GN=YES1 PE=1 SV=3	60.801	543	0	16.475	20242000	28242000	8242000	42198000	4589000	42207000	0	0	0	422	84;7187;7284;7725;10299;13663	538		297
P07996	Thrombospondin-1	THBS1	sp|P07996|TSP1_HUMAN Thrombospondin-1 OS=Homo sapiens OX=9606 GN=THBS1 PE=1 SV=2	129.38	1170	0	323.31	0	0	0	10568000	30852000	39575000	289000000	1291000000	3290800000	426	250;420;943;968;1373;1374;1377;1382;1571;1735;1863;1926;1976;2085;2086;2149;3146;3543;3544;3673;3702;3856;3991;4081;4605;4606;4622;4926;5305;5306;5663;5664;6138;6327;6712;6718;6719;6932;6934;6935;7160;7161;7162;8168;8361;8666;8912;9027;9028;9057;9058;9483;9850;10021;10212;10213;10939;11292;11577;11578;11584;11711;11764;11870;12965;13056;13200;13201;13206;13207	140;141;143;144;145;146;147;541;542;543;544;545;546;547;548;549	33;34;106	122;244;245;248;321;360;410;411;470;603;658;660;708;812;1067;1078	356;469;1132
P08133	Annexin A6	ANXA6	sp|P08133|ANXA6_HUMAN Annexin A6 OS=Homo sapiens OX=9606 GN=ANXA6 PE=1 SV=3	75.872	673	0	213.06	8592000	98592000	138592000	72163000	7833000	22179000	69550000	169810000	19780000	429	543;605;699;808;809;1488;1507;1868;1896;1918;2334;2415;2641;2642;2870;3509;3930;3984;4248;4517;4632;5605;6088;7927;8116;8555;8739;9910;10320;10648;10670;11737;11738;13339	554		307
P08174	Complement decay-accelerating factor	CD55	sp|P08174|DAF_HUMAN Complement decay-accelerating factor OS=Homo sapiens OX=9606 GN=CD55 PE=1 SV=4	41.4	381	0	133.77	81400000	481400000	41400000	750130000	5827000	75146000	6254000	36294000	26289000	431	1375;2679;4014;4541;4542;4543;5723;7672;8008;9628;9686;9835;10219;10220;10221;10232;11893;11894;13398	555;556		95;233
P08195	4F2 cell-surface antigen heavy chain	SLC3A2	sp|P08195|4F2_HUMAN 4F2 cell-surface antigen heavy chain OS=Homo sapiens OX=9606 GN=SLC3A2 PE=1 SV=3	67.993	630	0	323.31	225800000	2250800000	3250800000	1234300000	1645700000	1934500000	69353000	60445000	80435000	433	199;1512;1536;1537;1590;1591;1592;1748;1749;1914;2418;2820;3112;3492;3672;3940;3941;3942;4007;4293;4294;4295;4442;4443;4476;4477;5166;5388;5389;5563;6993;6994;7373;7374;7484;7485;7574;8357;9099;9100;10686;10741;10742;12125;12126;12141;12528;12529;12569;12587;13320;13416	557;558;559;560;561;562;563		267;316;365;381;424;428;560
P08236	Beta-glucuronidase	GUSB	sp|P08236|BGLR_HUMAN Beta-glucuronidase OS=Homo sapiens OX=9606 GN=GUSB PE=1 SV=2	74.731	651	0	78.792	0	0	0	0	0	0	60278000	65378000	35367000	434	174;1837;3128;5220;5912;6767;7413;7414;10013;10647;10883;13147;13749;13855	564;565;566		174;272;631
P08238	Heat shock protein HSP 90-beta	HSP90AB1	sp|P08238|HS90B_HUMAN Heat shock protein HSP 90-beta OS=Homo sapiens OX=9606 GN=HSP90AB1 PE=1 SV=4	83.263	724	0	323.31	330000000	630000000	430000000	747470000	74410000	447630000	691580000	479590000	499250000	436	181;198;218;589;717;1233;1406;1957;2003;2549;2645;2728;2782;2783;2864;2950;3973;4712;4857;4963;5018;5288;6304;6362;6581;7150;7151;8192;8193;9060;9327;9513;9803;9804;9862;10104;10579;10729;10730;10740;11598;11701;11702;12343;12533;12534;13507;13588;13593	529;567	107	310;601	602
P08294	Extracellular superoxide dismutase [Cu-Zn]	SOD3	sp|P08294|SODE_HUMAN Extracellular superoxide dismutase [Cu-Zn] OS=Homo sapiens OX=9606 GN=SOD3 PE=1 SV=2	25.851	240	0	41.599	0	0	0	0	0	0	59425000	57513000	77503000	438	394;601;1290;4052;6952;13058;13077	568;569		107;198
P08581	Hepatocyte growth factor receptor	MET	sp|P08581|MET_HUMAN Hepatocyte growth factor receptor OS=Homo sapiens OX=9606 GN=MET PE=1 SV=4	155.54	1390	0	36.525	57741000	37741000	27741000	0	0	0	0	0	0	440	1410;1638;3061;3420;5886;8584;8797;9158;10451;11466;12690	570;571;572;573;574		202;399;405;607;785
P08962	CD63 antigen	CD63	sp|P08962|CD63_HUMAN CD63 antigen OS=Homo sapiens OX=9606 GN=CD63 PE=1 SV=2	25.636	238	0	176.18	0	0	0	10430000	101360000	90450000	0	0	0	449	512;1351;1352;1852;5402;9032;9033;9133;9647;9648;9649;12773;12835	582;583;584;585;586;587;588;589	108;109;110	116;117;118;125;129;130;150;172	112;123;160
P09529	Inhibin beta B chain	INHBB	sp|P09529|INHBB_HUMAN Inhibin beta B chain OS=Homo sapiens OX=9606 GN=INHBB PE=1 SV=2	45.121	407	0	9.6218	0	0	0	88388000	83153000	76406000	0	0	0	456	4480;7644;7989;9993	590		93
P09603	Macrophage colony-stimulating factor 1;Processed macrophage colony-stimulating factor 1	CSF1	sp|P09603|CSF1_HUMAN Macrophage colony-stimulating factor 1 OS=Homo sapiens OX=9606 GN=CSF1 PE=1 SV=2	60.179	554	0	16.704	0	0	0	0	0	0	69959000	60056000	63045000	458	327;2260;3588;10223;12597	592		154
P09758	Tumor-associated calcium signal transducer 2	TACSTD2	sp|P09758|TACD2_HUMAN Tumor-associated calcium signal transducer 2 OS=Homo sapiens OX=9606 GN=TACSTD2 PE=1 SV=3	35.709	323	0	171.34	0	0	0	564100000	1073900000	164300000	0	0	0	461	43;691;1767;3690;3943;3949;5085;5086;8563;9390;10081;11496;11649;11650;11708;12941	594;595	111	120;168	62
P09871	Complement C1s subcomponent;Complement C1s subcomponent heavy chain;Complement C1s subcomponent light chain	C1S	sp|P09871|C1S_HUMAN Complement C1s subcomponent OS=Homo sapiens OX=9606 GN=C1S PE=1 SV=1	76.684	688	0	21.087	86674000	46674000	4674000	0	0	0	0	0	0	462	3891;8701;10251;10997;11725;12389	596;597		174;344
P0CW18	Serine protease 56	PRSS56	sp|P0CW18|PRS56_HUMAN Serine protease 56 OS=Homo sapiens OX=9606 GN=PRSS56 PE=1 SV=1	64.596	603	0	225.72	66680000	686680000	68680000	0	0	0	0	0	0	468	689;2791;3136;3944;4508;5142;5973;6252;6253;6776;6917;7582;8675;9800;10026;10192;10634;11698;12098;12163;12193;12194	598	112;113	97	269;577
P0DMV8	Heat shock 70 kDa protein 1A;Heat shock 70 kDa protein 1B	HSPA1A;HSPA1B	sp|P0DMV8|HS71A_HUMAN Heat shock 70 kDa protein 1A OS=Homo sapiens OX=9606 GN=HSPA1A PE=1 SV=1;sp|P0DMV9|HS71B_HUMAN Heat shock 70 kDa protein 1B OS=Homo sapiens OX=9606 GN=HSPA1B PE=1 SV=1	70.051	641	0	243.07	26060000	216060000	516060000	298960000	200810000	139010000	130860000	161030000	111010000	469	7;8;947;1006;1103;1104;1105;1497;1509;1789;1994;2765;4069;5171;5914;5915;6966;7952;8420;8593;8594;8596;8660;9116;9117;9252;9700;9923;10200;11058;11691;11972;11973;12634;12930	599;600	114	141;505	518
P0DP25			sp|P0DP25|CALM3_HUMAN Calmodulin-3 OS=Homo sapiens OX=9606 GN=CALM3 PE=1 SV=1;sp|P0DP24|CALM2_HUMAN Calmodulin-2 OS=Homo sapiens OX=9606 GN=CALM2 PE=1 SV=1;sp|P0DP23|CALM1_HUMAN Calmodulin-1 OS=Homo sapiens OX=9606 GN=CALM1 PE=1 SV=1	16.837	149	0	103.24	643430000	343430000	243430000	433050000	1073900000	133140000	68410000	268830000	568780000	470	210;211;2150;2299;2311;2312;2776;6461;8414;8415;10663;12321	601		98
P10253	Lysosomal alpha-glucosidase;76 kDa lysosomal alpha-glucosidase;70 kDa lysosomal alpha-glucosidase	GAA	sp|P10253|LYAG_HUMAN Lysosomal alpha-glucosidase OS=Homo sapiens OX=9606 GN=GAA PE=1 SV=4	105.32	952	0	34.293	0	0	0	0	0	0	77728000	17756000	27752000	471	1527;2125;2831;3835;4659;9049;9755;9886;11043;13131;13343	602;603;604;605;606;607		390;470;882;883;919;925
P10412	Histone H1.4;Histone H1.3	HIST1H1E;HIST1H1D	sp|P10412|H14_HUMAN Histone H1.4 OS=Homo sapiens OX=9606 GN=H1-4 PE=1 SV=2;sp|P16402|H13_HUMAN Histone H1.3 OS=Homo sapiens OX=9606 GN=H1-3 PE=1 SV=2	21.865	219	0	54.891	0	0	0	0	0	0	42030000	62125000	32114000	474	104;599;600;623;624;4590;4609;6049;6081;6082;6106;6497;10355;10475;10476	608		76
P10586	Receptor-type tyrosine-protein phosphatase F	PTPRF	sp|P10586|PTPRF_HUMAN Receptor-type tyrosine-protein phosphatase F OS=Homo sapiens OX=9606 GN=PTPRF PE=1 SV=2	212.88	1907	0	174.76	3071000	37071000	7071000	179620000	81290000	329660000	0	0	0	475	65;1314;1775;3321;3638;5502;5521;6683;8474;9317;10401;11438;11443;11447;11779;11855;12614;12837;12920;13379	609;610		721;966
P10619	Lysosomal protective protein;Lysosomal protective protein 32 kDa chain;Lysosomal protective protein 20 kDa chain	CTSA	sp|P10619|PPGB_HUMAN Lysosomal protective protein OS=Homo sapiens OX=9606 GN=CTSA PE=1 SV=2	54.465	480	0	83.337	9790000	19790000	20790000	81774000	92533000	89791000	54657000	34710000	64704000	477	1869;2189;2487;3729;8234;8325;10761;13498;13540;13541	611;612		145;333
P10646	Tissue factor pathway inhibitor	TFPI	sp|P10646|TFPI1_HUMAN Tissue factor pathway inhibitor OS=Homo sapiens OX=9606 GN=TFPI PE=1 SV=1	35.015	304	0	18.419	62031000	52031000	2031000	0	0	0	0	0	0	478	9386;11966;13530	613		145
P10909	Clusterin;Clusterin beta chain;Clusterin alpha chain	CLU	sp|P10909|CLUS_HUMAN Clusterin OS=Homo sapiens OX=9606 GN=CLU PE=1 SV=1	52.494	449	0	323.31	557200000	2557200000	4557200000	2634300000	4658800000	2034900000	904010000	705100000	404970000	481	1078;1079;1080;1437;2412;2413;2510;2650;2657;2659;2751;2752;2824;2912;3341;3503;3504;5030;6166;6167;6353;6645;6646;6755;6855;7061;7360;8412;8459;9544;9658;9832;10003;10461;11646;11657;11658;13120;13121;13847	97;614;615;616;617;618;619;620;621	118;119;120	51;86;103;145;155;291;354;363;374	106;107;352
P11047	Laminin subunit gamma-1	LAMC1	sp|P11047|LAMC1_HUMAN Laminin subunit gamma-1 OS=Homo sapiens OX=9606 GN=LAMC1 PE=1 SV=3	177.6	1609	0	323.31	231490000	281490000	381490000	242570000	294820000	342620000	209720000	250100000	904010000	483	219;295;477;618;1099;1208;1435;1579;1847;2005;2008;2361;2362;2364;2365;2366;2529;2530;3177;3178;4211;4950;5032;5242;5243;5721;6330;6331;6537;6540;6713;6746;6940;7179;7219;7355;7538;7682;7768;7806;7892;8143;8333;8688;8689;8889;8890;8903;9186;9401;9742;9810;9929;10112;11044;11209;11248;11396;11469;11592;11617;11618;11672;11867;12093;12094;12468;12594;12595;12787;12808;12967;13025;13503	624;625;626;627;628;629;630;631;632;633;634;635;636;637;638		576;649;650;1022;1107;1161;1175;1205;1223;1241;1378;1380;1395;1402;1439
P11142	Heat shock cognate 71 kDa protein	HSPA8	sp|P11142|HSP7C_HUMAN Heat shock cognate 71 kDa protein OS=Homo sapiens OX=9606 GN=HSPA8 PE=1 SV=1	70.897	646	0	323.31	34760000	44760000	434760000	84640000	791930000	1784810000	44350000	455040000	494960000	485	222;1007;1496;1510;1785;1854;2614;4371;4372;4602;5170;5503;5504;5914;5915;6139;6968;7546;7951;8261;8419;8589;8590;8593;8594;8595;9118;9119;9149;9212;9253;9663;9701;9840;10345;10549;10603;10604;10895;11027;11690;11972;11973;12049;12215;12928;13614;13615	599;643;644;645	121;122;123	174;355;505;540	87;237;549
P11166	Solute carrier family 2, facilitated glucose transporter member 1	SLC2A1	sp|P11166|GTR1_HUMAN Solute carrier family 2, facilitated glucose transporter member 1 OS=Homo sapiens OX=9606 GN=SLC2A1 PE=1 SV=2	54.083	492	0	156.67	282610000	182610000	382610000	324420000	387430000	524490000	463090000	303650000	363590000	486	433;434;3469;4566;6720;7595;7857;8364;9452;10806;12508;13084	646	124	45	244
P11279	Lysosome-associated membrane glycoprotein 1	LAMP1	sp|P11279|LAMP1_HUMAN Lysosome-associated membrane glycoprotein 1 OS=Homo sapiens OX=9606 GN=LAMP1 PE=1 SV=3	44.882	417	0	133.22	99488000	39488000	79488000	0	0	0	0	0	0	491	749;1416;3331;3332;4113;6149;7535;8687;9023;10450;10962;12003;13806	649;650;651;652;653;654;655;656;657		62;76;84;103;107;121;130;249;261
P11717	Cation-independent mannose-6-phosphate receptor	IGF2R	sp|P11717|MPRI_HUMAN Cation-independent mannose-6-phosphate receptor OS=Homo sapiens OX=9606 GN=IGF2R PE=1 SV=3	274.37	2491	0	58.318	0	0	0	0	0	0	15654000	25725000	45717000	496	1148;1697;3852;4782;4886;5562;8479;10091;11641;11742	658;659;660;661;662	126	543;581;747;1246;1312	1311
P12109	Collagen alpha-1(VI) chain	COL6A1	sp|P12109|CO6A1_HUMAN Collagen alpha-1(VI) chain OS=Homo sapiens OX=9606 GN=COL6A1 PE=1 SV=3	108.53	1028	0	134.68	0	0	0	0	0	0	50550000	150780000	250760000	500	2899;3318;4658;7505;7939;7940;9008;9052;9979;10718;11221;12200;13661	663;664		212;804
P12268	Inosine-5-monophosphate dehydrogenase 2	IMPDH2	sp|P12268|IMDH2_HUMAN Inosine-5-monophosphate dehydrogenase 2 OS=Homo sapiens OX=9606 GN=IMPDH2 PE=1 SV=2	55.804	514	0	219.36	8521000	18521000	28521000	57870000	552960000	547990000	67799000	37857000	27850000	505	818;1747;1856;3387;4204;4995;7717;8957;9846;10090;11794;11917;11918;12429;13602
P12644	Bone morphogenetic protein 4	BMP4	sp|P12644|BMP4_HUMAN Bone morphogenetic protein 4 OS=Homo sapiens OX=9606 GN=BMP4 PE=1 SV=1	46.554	408	0	22.671	0	0	0	0	0	0	7139000	78260000	58246000	509	3461;7833;8129;11510	668;669		143;208
P13010	X-ray repair cross-complementing protein 5	XRCC5	sp|P13010|XRCC5_HUMAN X-ray repair cross-complementing protein 5 OS=Homo sapiens OX=9606 GN=XRCC5 PE=1 SV=3	82.704	732	0	265.6	0	0	0	84950000	186670000	384990000	103920000	24230000	204200000	514	344;751;860;1038;2053;2423;2425;2426;2438;3088;3333;4179;5034;5095;5776;5777;6104;6351;6734;8034;8587;9576;9577;9727;9776;10897;10898;11379;12314;12560	671		557
P13473	Lysosome-associated membrane glycoprotein 2	LAMP2	sp|P13473|LAMP2_HUMAN Lysosome-associated membrane glycoprotein 2 OS=Homo sapiens OX=9606 GN=LAMP2 PE=1 SV=2	44.96	410	0	56.653	64016000	54016000	18521000	0	0	0	10701000	30748000	3742000	516	4161;4162;5254;5732;10511;12187;12913;13383;13510;13642	673;674;675;676;677		49;58;101;257;356
P13497	Bone morphogenetic protein 1	BMP1	sp|P13497|BMP1_HUMAN Bone morphogenetic protein 1 OS=Homo sapiens OX=9606 GN=BMP1 PE=1 SV=2	111.25	986	0	116.24	0	0	0	0	0	0	9595000	49671000	4663000	518	114;375;376;1672;2263;2882;3101;3279;3974;3975;4000;5500;5848;5875;5876;6248;7632;8020;8363;10276;10416;13270;13469;13470	678;679;680		142;363;599
P13726	Tissue factor	F3	sp|P13726|TF_HUMAN Tissue factor OS=Homo sapiens OX=9606 GN=F3 PE=1 SV=1	33.067	295	0	65.002	0	0	0	0	0	0	151386000	521465000	51456000	523	1388;1900;2210;9048;9982;11549;11759;12830	681;682;683		63;156;169
P13987	CD59 glycoprotein	CD59	sp|P13987|CD59_HUMAN CD59 glycoprotein OS=Homo sapiens OX=9606 GN=CD59 PE=1 SV=1	14.177	128	0	58.512	42250000	420250000	620250000	860680000	464960000	40780000	76030000	116200000	16180000	529	400;1470;3312;7850;7851;11275	684		43
P14618	Pyruvate kinase PKM	PKM	sp|P14618|KPYM_HUMAN Pyruvate kinase PKM OS=Homo sapiens OX=9606 GN=PKM PE=1 SV=4	57.936	531	0	323.31	539950000	509950000	599950000	716290000	792940000	916440000	82780000	427050000	826900000	536	246;247;392;891;1028;2300;2301;3289;3385;3386;3754;3755;3878;3905;3907;3976;4141;4510;4511;4686;4687;5326;5515;5917;5918;6038;6102;6103;6235;6283;6525;6863;6963;7629;7630;8501;9184;9518;9841;9934;10159;10442;10611;11100;11265;11266;12793;13160	688;689	131;132;133;134	199;350	291;330;360;525
P14625	Endoplasmin	HSP90B1	sp|P14625|ENPL_HUMAN Endoplasmin OS=Homo sapiens OX=9606 GN=HSP90B1 PE=1 SV=1	92.468	803	0	90.99	47312000	27312000	57312000	34600000	3921000	14608000	156190000	150430000	56400000	537	1790;2309;2572;2584;2782;2783;3577;4238;4711;5025;5544;7211;7305;8017;8966;10543	690;691;692		217;445;502
P14923	Junction plakoglobin	JUP	sp|P14923|PLAK_HUMAN Junction plakoglobin OS=Homo sapiens OX=9606 GN=JUP PE=1 SV=3	81.744	745	0	118.59	62840000	162840000	1602840000	71020000	372600000	171050000	0	0	0	541	2354;3445;5659;7303;7589;7683;8342;8343;8465;8752;8927;10162;11709;12097;12729;13018	693		309
P15328	Folate receptor alpha	FOLR1	sp|P15328|FOLR1_HUMAN Folate receptor alpha OS=Homo sapiens OX=9606 GN=FOLR1 PE=1 SV=3	29.819	257	0	187.54	361320000	461320000	41320000	0	0	0	0	0	0	550	1348;1398;2239;2714;3526;4720;6465;6466;7222;8636;10803;11372;12700;12701;12702	695;696;697	135	69;87;161	92
P15880	40S ribosomal protein S2	RPS2	sp|P15880|RS2_HUMAN 40S ribosomal protein S2 OS=Homo sapiens OX=9606 GN=RPS2 PE=1 SV=2	31.324	293	0	63.911	775190000	175190000	17190000	116440000	17520000	316470000	9765000	73878000	79865000	555	226;351;1128;1391;2984;3094;3857;5406;6418;7533;7947;7948;10649;10866	704		134
P16070	CD44 antigen	CD44	sp|P16070|CD44_HUMAN CD44 antigen OS=Homo sapiens OX=9606 GN=CD44 PE=1 SV=3	81.537	742	0	125.55	389790000	329790000	309790000	90577000	98418000	9096000	26980000	207300000	417260000	559	337;767;3022;3247;3248;6444;6527;8140;8141;8984;10876;10877;10878;11340;11341;13546;13783;13850	705;706;707;708	137;138;139;140	39;57;688;700	63;66;709;725
P16144	Integrin beta-4	ITGB4	sp|P16144|ITB4_HUMAN Integrin beta-4 OS=Homo sapiens OX=9606 GN=ITGB4 PE=1 SV=5	202.16	1822	0	94.765	0	0	0	0	0	0	40695000	49757000	207300000	561	1757;2278;2389;5021;5830;7259;7440;8316;8452;9245;9246;9861;10015;10317;11509;11825;12238;12724	709		327
P16403	Histone H1.2	HIST1H1C	sp|P16403|H12_HUMAN Histone H1.2 OS=Homo sapiens OX=9606 GN=H1-2 PE=1 SV=2	21.364	213	0	5.3517	0	0	0	0	0	0	27984000	28027000	20022000	564	104;623;624;4590;4609;6044;6049;6081;6082;10353;10354;10475;10476	608		76
P16422	Epithelial cell adhesion molecule	EPCAM	sp|P16422|EPCAM_HUMAN Epithelial cell adhesion molecule OS=Homo sapiens OX=9606 GN=EPCAM PE=1 SV=2	34.932	314	0	286.74	0	0	0	605190000	691550000	85340000	0	0	0	565	259;606;877;1004;2153;2154;2218;2856;2857;3430;3948;6451;6452;6903;8323;9389;9391;9798;10080;11243;11324;11325;11846;11847;11848;12089;12090;12091;12947;12948;13497	711;712;713;714;715;716;717;718		41;55;74;90;111;198;205;236
P16671	Platelet glycoprotein 4	CD36	sp|P16671|CD36_HUMAN Platelet glycoprotein 4 OS=Homo sapiens OX=9606 GN=CD36 PE=1 SV=2	53.053	472	0	149.79	0	0	0	228750000	281340000	28810000	0	0	0	567	2807;5516;6575;7844;8713;8997;9311;9312;9439;9760;9957;9988;10575;10922;10994;11477;12080;12352	719;720;721;722;723;724;725;726	141	79;205;216;220;235;247;321;417	429
P17301	Integrin alpha-2	ITGA2	sp|P17301|ITA2_HUMAN Integrin alpha-2 OS=Homo sapiens OX=9606 GN=ITGA2 PE=1 SV=1	129.29	1181	0	200.5	0	0	0	17300000	68850000	167340000	8216000	68320000	168308000	572	874;1224;1564;3368;3885;5375;5422;5731;7653;9348;9500;11067;11255;11586;11748;11864;12373;12778;13166;13515	729;730;731;732;733;734;735	142	105;112;343;432;460;475;1057	113
P17655	Calpain-2 catalytic subunit	CAPN2	sp|P17655|CAN2_HUMAN Calpain-2 catalytic subunit OS=Homo sapiens OX=9606 GN=CAPN2 PE=1 SV=6	79.994	700	0	68.912	0	0	0	0	0	0	319354000	39415000	3408000	575	1661;3229;4091;6066;6459;8382;8488;9890;13670	736		275
P18077	60S ribosomal protein L35a	RPL35A	sp|P18077|RL35A_HUMAN 60S ribosomal protein L35a OS=Homo sapiens OX=9606 GN=RPL35A PE=1 SV=2	12.538	110	0	10.636	6734000	36734000	56734000	0	0	0	0	0	0	584	1606;2609;5316;9051	738		56
P18084	Integrin beta-5	ITGB5	sp|P18084|ITB5_HUMAN Integrin beta-5 OS=Homo sapiens OX=9606 GN=ITGB5 PE=1 SV=1	88.053	799	0	85.087	0	0	0	72424000	63004000	32437000	0	0	0	585	1513;1570;1572;3863;4509;6805;7137;8871;10785	739;740		654;705
P19338	Nucleolin	NCL	sp|P19338|NUCL_HUMAN Nucleolin OS=Homo sapiens OX=9606 GN=NCL PE=1 SV=3	76.613	710	0	53.912	20309000	60309000	69309000	50562000	31032000	50573000	4390000	43456000	143449000	595	1129;2349;2355;3978;4280;4721;5997;6216;9169;11456;11707;12280	744		519
P20645	Cation-dependent mannose-6-phosphate receptor	M6PR	sp|P20645|MPRD_HUMAN Cation-dependent mannose-6-phosphate receptor OS=Homo sapiens OX=9606 GN=M6PR PE=1 SV=1	30.993	277	0	40.321	0	0	0	0	0	0	15737200	5746000	5045000	607	2320;4030;4306;7626;7627	746;747;748;749		83;107;113;116
P20908	Collagen alpha-1(V) chain	COL5A1	sp|P20908|CO5A1_HUMAN Collagen alpha-1(V) chain OS=Homo sapiens OX=9606 GN=COL5A1 PE=1 SV=3	183.56	1838	0	194.24	54980000	579980000	549980000	0	0	0	507590000	538420000	38320000	611	1531;3363;3454;3952;4165;4397;4538;5217;5578;6274;6493;7554;7565;9286;9287;9590;10859;12022;12631;13278	752;753;754	146	176;1672;1741	538
P21333	Filamin-A	FLNA	sp|P21333|FLNA_HUMAN Filamin-A OS=Homo sapiens OX=9606 GN=FLNA PE=1 SV=4	280.74	2647	0	323.31	18660000	38660000	138660000	3300100	33330700	33000800	43690000	244060000	144020000	616	310;409;484;1047;1110;1490;1491;1525;1526;1694;1821;2202;2445;2559;3050;3051;3362;3770;3774;4289;4386;5028;5110;5304;5780;6475;6576;6641;7267;7268;7474;8080;8185;8189;8270;9598;9792;9962;10156;10821;10867;11492;11773;12167;12181;12296;12438;12439;12440;12449;12470;12471;12486;12606;12607;12705;12706;12824;12976;13040;13128;13318;13334;13548;13551;13552;13701;13860	756;757		2026;2524
P21589	5-nucleotidase	NT5E	sp|P21589|5NTD_HUMAN 5-nucleotidase OS=Homo sapiens OX=9606 GN=NT5E PE=1 SV=1	63.367	574	0	181.72	0	0	0	0	0	0	101640000	251950000	201920000	618	299;3069;3145;3761;4364;4652;4821;5464;5555;6704;9030;9793;10829;12567;12707;13563	758;759;760;761		311;333;402;403
P21926	CD9 antigen	CD9	sp|P21926|CD9_HUMAN CD9 antigen OS=Homo sapiens OX=9606 GN=CD9 PE=1 SV=4	25.416	228	0	121.81	229210000	429210000	929210000	1503600000	1214700000	3203800000	87479000	97614000	82598000	620	514;515;1604;1608;1609;2220;3151;3152;3153;6160;10231;11580;11581	763;764		130;151
P21980	Protein-glutamine gamma-glutamyltransferase 2	TGM2	sp|P21980|TGM2_HUMAN Protein-glutamine gamma-glutamyltransferase 2 OS=Homo sapiens OX=9606 GN=TGM2 PE=1 SV=2	77.328	687	0	108.18	0	0	0	0	0	0	249250000	149480000	199460000	622	235;730;1728;2427;2514;4440;6800;8211;9434;11105;12437;13221;13234;13360;13757	765		17
P22413	Ectonucleotide pyrophosphatase/phosphodiesterase family member 1;Alkaline phosphodiesterase I;Nucleotide pyrophosphatase	ENPP1	sp|P22413|ENPP1_HUMAN Ectonucleotide pyrophosphatase/phosphodiesterase family member 1 OS=Homo sapiens OX=9606 GN=ENPP1 PE=1 SV=2	104.92	925	0	112.5	0	0	0	89851000	85639000	80869000	28124000	52475000	18189000	628	1442;4823;4873;5572;5890;7884;8627;8992;9085;10637;11333;13033;13468	768;769;770;771;772		341;477;584;585;731
P23142	Fibulin-1	FBLN1	sp|P23142|FBLN1_HUMAN Fibulin-1 OS=Homo sapiens OX=9606 GN=FBLN1 PE=1 SV=4	77.213	703	0	31.371	21802000	61802000	161802000	0	0	0	0	0	0	632	1347;1462;1569;4738;4753;8597;9264	773		98
P23229	Integrin alpha-6;Integrin alpha-6 heavy chain;Integrin alpha-6 light chain;Processed integrin alpha-6	ITGA6	sp|P23229|ITA6_HUMAN Integrin alpha-6 OS=Homo sapiens OX=9606 GN=ITGA6 PE=1 SV=5	126.6	1130	0	159.23	0	0	0	0	0	0	1163470000	163720000	16690000	633	315;838;839;3377;4187;5312;6603;6760;7692;7720;8231;9072;9174;9581;10054;10304;10944;11452;13046;13756	774;775;776;777;778		323;770;930;966;997
P23634	Plasma membrane calcium-transporting ATPase 4	ATP2B4	sp|P23634|AT2B4_HUMAN Plasma membrane calcium-transporting ATPase 4 OS=Homo sapiens OX=9606 GN=ATP2B4 PE=1 SV=2	137.92	1241	0	8.4538	305580000	35580000	55580000	0	0	0	0	0	0	646	4430;4958;5625;6064;6065;8566;8605;8819;9754;9876;10932;13538	779		195
P24821	Tenascin	TNC	sp|P24821|TENA_HUMAN Tenascin OS=Homo sapiens OX=9606 GN=TNC PE=1 SV=3	240.85	2201	0	70.055	0	0	0	0	0	0	144600000	44820000	14490000	651	1946;2240;4093;4112;4725;7329;7453;7693;9003;9018;10388;12190;12315;13384	780;781;782		1018;1119;1485
P25391	Laminin subunit alpha-1	LAMA1	sp|P25391|LAMA1_HUMAN Laminin subunit alpha-1 OS=Homo sapiens OX=9606 GN=LAMA1 PE=1 SV=2	337.08	3075	0	143.3	3904000	39004000	99004000	0	0	0	0	0	0	652	27;301;339;721;1096;2194;2746;2747;4242;5075;5361;5556;6321;6431;9489;9699;10722;10824;10853;11556;11588;11830;13714;13801;13828	783;784;785;786;787;788;789;790;791;792;793		38;555;665;1991;2038;2244;2384;2518;2619;2729;2852
P25788	Proteasome subunit alpha type-3	PSMA3	sp|P25788|PSA3_HUMAN Proteasome subunit alpha type-3 OS=Homo sapiens OX=9606 GN=PSMA3 PE=1 SV=2	28.433	255	0	83.874	0	0	0	163940000	145270000	163970000	824020000	694980000	624870000	658	300;1210;1403;1404;1781;1782;1801;2439;3005;5146;5535;8238;8239;9339;10627;10628;10775;10776;10985;11367;12369	796	152	222	76
P26006	Integrin alpha-3;Integrin alpha-3 heavy chain;Integrin alpha-3 light chain	ITGA3	sp|P26006|ITA3_HUMAN Integrin alpha-3 OS=Homo sapiens OX=9606 GN=ITGA3 PE=1 SV=5	116.61	1051	0	323.31	0	0	0	5186500	9271800	7188500	209990000	197740000	297690000	661	41;447;615;1014;1017;1018;1433;1434;1576;1829;2322;2395;2748;3197;3245;4269;5010;5080;6205;6415;7027;7028;7029;7166;7527;7831;7874;8734;8894;8895;8896;9980;10359;10638;10639;10640;10914;11436;11437;11901;12744;12796;13267;13268;13269;13293;13664;13822;13823	797;798;799;800;801;802;803;804;805;806;807	153;154;155	86;107;265;511;573;605;656;926;935;951;969	278;785;967
P26022	Pentraxin-related protein PTX3	PTX3	sp|P26022|PTX3_HUMAN Pentraxin-related protein PTX3 OS=Homo sapiens OX=9606 GN=PTX3 PE=1 SV=3	41.975	381	0	149.8	0	0	0	0	0	0	56030000	266440000	26390000	663	197;628;1116;1117;1118;3053;4336;5357;6319;6813;7079;7849;8022;8023;8057;8349;8453;8454;11550	809	156;157	220	134;202
P26641	Elongation factor 1-gamma	EEF1G	sp|P26641|EF1G_HUMAN Elongation factor 1-gamma OS=Homo sapiens OX=9606 GN=EEF1G PE=1 SV=3	50.118	437	0	137.24	158131000	58131000	588131000	17880000	129070000	327910000	306880000	337400000	537340000	674	49;698;3205;3528;4415;4557;5598;6042;6207;6222;6381;6467;9350;9374;9375;9733;9909;11038;11414;12721;13086;13087;13789	810		340
P27701	CD82 antigen	CD82	sp|P27701|CD82_HUMAN CD82 antigen OS=Homo sapiens OX=9606 GN=CD82 PE=1 SV=1	29.625	267	0	96.422	0	0	0	841100000	596120000	541210000	321650000	11840000	121810000	681	2269;3918;3964;5149;5150;6246;6247;7387;9419;11857	811;812;813	159	129;198;204	117
P28799	Granulins;Acrogranin;Paragranulin;Granulin-1;Granulin-2;Granulin-3;Granulin-4;Granulin-5;Granulin-6;Granulin-7	GRN	sp|P28799|GRN_HUMAN Progranulin OS=Homo sapiens OX=9606 GN=GRN PE=1 SV=2	63.544	593	0	178.91	4834000	148734000	48734000	137259000	7605000	37267000	92860000	19150000	193120000	693	1064;1187;1411;1412;1421;1756;2205;2206;3987;4571;4804;7695;7832;9473;10215;10828;10931;12466;13535	814;815;816		236;265;530
P29144	Tripeptidyl-peptidase 2	TPP2	sp|P29144|TPP2_HUMAN Tripeptidyl-peptidase 2 OS=Homo sapiens OX=9606 GN=TPP2 PE=1 SV=4	138.35	1249	0	164.39	0	0	0	0	0	0	26210000	206530000	276500000	696	204;813;854;2551;3709;4672;4837;5265;6544;7248;7624;7966;7988;8733;12792;12847	817		161
P29317	Ephrin type-A receptor 2	EPHA2	sp|P29317|EPHA2_HUMAN Ephrin type-A receptor 2 OS=Homo sapiens OX=9606 GN=EPHA2 PE=1 SV=2	108.27	976	0	58.298	0	0	0	0	0	0	68748000	48823000	148814000	698	1565;1660;2684;3186;3684;7730;11261;11262;12225;13641	818		435
P29320	Ephrin type-A receptor 3	EPHA3	sp|P29320|EPHA3_HUMAN Ephrin type-A receptor 3 OS=Homo sapiens OX=9606 GN=EPHA3 PE=1 SV=2	110.13	983	0	83.697	0	0	0	79091000	72760000	82106000	0	0	0	699	1626;1627;2750;4613;4813;5527;6289;9247;10612;11559;13862	819;820		337;493
P29966	Myristoylated alanine-rich C-kinase substrate	MARCKS	sp|P29966|MARCS_HUMAN Myristoylated alanine-rich C-kinase substrate OS=Homo sapiens OX=9606 GN=MARCKS PE=1 SV=4	31.554	332	0	84.493	290740000	190740000	199740000	0	0	0	40012000	47085000	147076000	704	29;223;836;2317;2360;3908;11215	821;822		32;36
P30530	Tyrosine-protein kinase receptor UFO	AXL	sp|P30530|UFO_HUMAN Tyrosine-protein kinase receptor UFO OS=Homo sapiens OX=9606 GN=AXL PE=1 SV=4	98.336	894	0	15.7	0	0	0	0	0	0	124229000	24266000	47085000	717	2083;3497;8825;10675;11985;12111	823;824;825;826		157;198;339;345
P32004	Neural cell adhesion molecule L1	L1CAM	sp|P32004|L1CAM_HUMAN Neural cell adhesion molecule L1 OS=Homo sapiens OX=9606 GN=L1CAM PE=1 SV=2	140	1257	0	263.23	61060000	161060000	191060000	0	0	0	0	0	0	732	306;307;964;1543;1927;1929;2534;2535;2556;3080;3335;3787;3868;3923;4027;4410;4507;4750;4883;5061;5644;7458;7973;8134;8154;9130;11506;12396;12570;12841;12877;12931;12932;13039;13063;13094;13140;13376;13389;13420	829;830;831;832;833;834;835;836;837;838;839;840;841;842;843;844;845;846		190;203;247;294;433;479;490;588;671;726;777;849;931;979;1022;1030;1071;1105
P32969	60S ribosomal protein L9	RPL9	sp|P32969|RL9_HUMAN 60S ribosomal protein L9 OS=Homo sapiens OX=9606 GN=RPL9 PE=1 SV=1	21.863	192	0	55.488	164552000	64552000	69552000	0	0	0	0	0	0	735	1632;4710;8516;11158;11524;12018	848		108
P35052	Glypican-1;Secreted glypican-1	GPC1	sp|P35052|GPC1_HUMAN Glypican-1 OS=Homo sapiens OX=9606 GN=GPC1 PE=1 SV=2	61.68	558	0	39.113	0	0	0	0	0	0	246575000	460647000	46639000	744	5269;10368;10392;12710;12811	851;852		79;116
P35579	Myosin-9	MYH9	sp|P35579|MYH9_HUMAN Myosin-9 OS=Homo sapiens OX=9606 GN=MYH9 PE=1 SV=4	226.53	1960	0	323.31	17288600	7288600	3288600	0	0	0	106460000	146690000	40660000	755	173;425;426;656;667;849;972;1074;1075;1432;1932;2035;2055;2431;2432;2720;2763;3476;3628;5098;5200;5201;5233;5234;5235;5482;6091;6173;6368;6388;6454;6548;6549;6678;6690;7371;7820;7843;8015;8338;8508;8644;8978;9012;9013;9180;9412;9487;9520;9668;10055;10061;10483;10608;10760;11410;11629;12270;12271;12272;12553;12555;12556;12608;12801;12980	857		305
P35613	Basigin	BSG	sp|P35613|BASI_HUMAN Basigin OS=Homo sapiens OX=9606 GN=BSG PE=1 SV=2	42.2	385	0	307.45	576100000	1576100000	1976100000	388400000	792010000	308490000	235730000	135940000	195920000	758	738;2414;3342;4083;4084;4491;5613;5889;6508;9926;10334;10335;10351;10352;10968;10969;11356;13370	858;859;860	162;163;164	160;268;302	239;267;292
P36578	60S ribosomal protein L4	RPL4	sp|P36578|RL4_HUMAN 60S ribosomal protein L4 OS=Homo sapiens OX=9606 GN=RPL4 PE=1 SV=5	47.697	427	0	81.24	293060000	203060000	103060000	907431000	98335000	197451000	102230000	192520000	92490000	764	0;140;2384;6501;6530;6861;8879;9044;9627;13441	861;862		47;48
P38571	Lysosomal acid lipase/cholesteryl ester hydrolase	LIPA	sp|P38571|LICH_HUMAN Lysosomal acid lipase/cholesteryl ester hydrolase OS=Homo sapiens OX=9606 GN=LIPA PE=1 SV=2	45.418	399	0	55.58	0	0	0	5356000	54356000	153868000	239318000	390378000	39372000	773	9307;11470;12259;13367;13482	865;866		161;321
P39023	60S ribosomal protein L3	RPL3	sp|P39023|RL3_HUMAN 60S ribosomal protein L3 OS=Homo sapiens OX=9606 GN=RPL3 PE=1 SV=2	46.108	403	0	85.565	35088000	35880000	350880000	293620000	215610000	13670000	102390000	172660000	472630000	778	404;459;1639;2966;3108;3182;3859;6608;6732;7047;7048;9026;10550;10696;12004;12005;12499	867		186
P40199	Carcinoembryonic antigen-related cell adhesion molecule 6	CEACAM6	sp|P40199|CEAM6_HUMAN Carcinoembryonic antigen-related cell adhesion molecule 6 OS=Homo sapiens OX=9606 GN=CEACAM6 PE=1 SV=3	37.194	344	0	13.132	0	0	0	26127000	46555000	4636000	0	0	0	784	3138;7802;7803	869;870		195;197
P42566	Epidermal growth factor receptor substrate 15	EPS15	sp|P42566|EPS15_HUMAN Epidermal growth factor receptor substrate 15 OS=Homo sapiens OX=9606 GN=EPS15 PE=1 SV=2	98.655	896	0	266.25	0	0	0	47280000	441340000	737380000	0	0	0	802	2;256;960;1343;2033;4157;5019;7667;7732;7813;7814;7949;8085;8866;9230;9662;9837;10198;11323;11464;11891;12063;12621;13475	873		85
P42892	Endothelin-converting enzyme 1	ECE1	sp|P42892|ECE1_HUMAN Endothelin-converting enzyme 1 OS=Homo sapiens OX=9606 GN=ECE1 PE=1 SV=2	87.163	770	0	69.585	0	0	0	3027000	139389000	39035000	0	0	0	806	149;742;1981;2284;3334;4976;4977;7146;7462;7463;9162;11781	874;875;876;877;878;879;880		166;187;210;270;316;539;632
P43007	Neutral amino acid transporter A	SLC1A4	sp|P43007|SATT_HUMAN Neutral amino acid transporter A OS=Homo sapiens OX=9606 GN=SLC1A4 PE=1 SV=1	55.722	532	0	32.753	0	0	0	15860000	153270000	251900000	0	0	0	808	3079;6241;8951;10039;11979;13237	883;884		201;206
P43121	Cell surface glycoprotein MUC18	MCAM	sp|P43121|MUC18_HUMAN Cell surface glycoprotein MUC18 OS=Homo sapiens OX=9606 GN=MCAM PE=1 SV=2	71.607	646	0	190.01	38120000	389120000	589120000	0	0	0	0	0	0	810	886;966;1389;1458;1459;2302;2467;2606;3175;3812;4407;6184;6600;7728;8821;9464;10262;10435;11843;11844;12475;13294	885;886;887;888		56;177;302;418
P48509	CD151 antigen	CD151	sp|P48509|CD151_HUMAN CD151 antigen OS=Homo sapiens OX=9606 GN=CD151 PE=1 SV=3	28.295	253	0	132.82	49868000	39868000	30868000	98215000	89034000	188234000	54838000	94984000	34967000	842	1720;1721;2890;7051;10124;12050;12279;13583	894		159
P48643	T-complex protein 1 subunit epsilon	CCT5	sp|P48643|TCPE_HUMAN T-complex protein 1 subunit epsilon OS=Homo sapiens OX=9606 GN=CCT5 PE=1 SV=1	59.67	541	0	323.31	99565000	92565000	9265000	16932000	170890000	199350000	425700000	406320000	46250000	844	285;1065;1066;1280;2156;2200;2696;3049;3611;3612;4947;5197;5276;5811;6559;7129;7130;7607;8402;8406;8468;8469;8478;8960;9591;9592;9633;9635;10498;10666;12151;12414;13205;13255;13409;13499	895;896	168	179;317	448
P48960	CD97 antigen;CD97 antigen subunit alpha;CD97 antigen subunit beta	CD97	sp|P48960|AGRE5_HUMAN Adhesion G protein-coupled receptor E5 OS=Homo sapiens OX=9606 GN=ADGRE5 PE=1 SV=4	91.868	835	0	182.27	3984000	39894000	139894000	35520000	39850000	35528000	131370000	141590000	41560000	850	2186;2817;2818;3874;4040;4875;4876;4971;6534;7897;9958;11412;11916;13319;13773	899;900;901;902;903	169;170	38;108;371;453;454	338;374
P49327	Fatty acid synthase;[Acyl-carrier-protein] S-acetyltransferase;[Acyl-carrier-protein] S-malonyltransferase;3-oxoacyl-[acyl-carrier-protein] synthase;3-oxoacyl-[acyl-carrier-protein] reductase;3-hydroxyacyl-[acyl-carrier-protein] dehydratase;Enoyl-[acyl-carrier-protein] reductase;Oleoyl-[acyl-carrier-protein] hydrolase	FASN	sp|P49327|FAS_HUMAN Fatty acid synthase OS=Homo sapiens OX=9606 GN=FASN PE=1 SV=3	273.42	2511	0	323.31	384670000	154670000	284670000	1643100000	2153700000	1143400000	597670000	578560000	508460000	856	32;70;88;146;296;303;540;541;603;617;687;991;1405;1456;1466;1654;1680;1713;1732;1772;1950;1991;2010;2020;2181;2188;2295;2326;2327;2419;2531;2816;2926;3188;3278;3457;4056;4059;4107;4153;4254;4255;4298;4309;4322;4596;4597;4650;4651;4731;4793;4833;4853;4884;5099;5727;6434;6435;7056;7175;7240;7504;7553;7588;7605;7681;7705;7795;7796;7845;7858;7921;7967;8049;8271;8272;8300;8347;8348;8432;8615;9282;9283…	906;907	171;172;173;174	1191;1193	680;2041;2088;2104
P49368	T-complex protein 1 subunit gamma	CCT3	sp|P49368|TCPG_HUMAN T-complex protein 1 subunit gamma OS=Homo sapiens OX=9606 GN=CCT3 PE=1 SV=4	60.533	545	0	185.05	19479000	69479000	60479000	69663000	79310000	99678000	31640000	311120000	111070000	857	156;595;646;844;2775;4175;5133;5277;5278;5634;5842;5981;5993;5994;6083;6243;6244;6320;6711;8451;8477;8599;9256;9451;11273;11274;11648;12289;12922;13397	908;909		188;481
P49841	Glycogen synthase kinase-3 beta	GSK3B	sp|P49841|GSK3B_HUMAN Glycogen synthase kinase-3 beta OS=Homo sapiens OX=9606 GN=GSK3B PE=1 SV=2	46.744	420	0	17.359	0	0	0	79125000	70776000	7140000	0	0	0	870	6380;6922;10635;12515;13123	911		64
P50895	Basal cell adhesion molecule	BCAM	sp|P50895|BCAM_HUMAN Basal cell adhesion molecule OS=Homo sapiens OX=9606 GN=BCAM PE=1 SV=2	67.404	628	0	171.76	0	0	0	41711000	480990000	327200000	0	0	0	883	177;2367;2697;3800;4445;4608;6874;7687;8146;11114;11849;12723;13113	913;914;915;916	176	173;377;383;439	83
P50897	Palmitoyl-protein thioesterase 1	PPT1	sp|P50897|PPT1_HUMAN Palmitoyl-protein thioesterase 1 OS=Homo sapiens OX=9606 GN=PPT1 PE=1 SV=1	34.193	306	0	108.65	0	0	0	79125000	87314000	80529000	0	0	0	884	3470;4164;5726;6332;6333;7815;8169;8170;8847;11660	917;918;919		197;212;232
P50991	T-complex protein 1 subunit delta	CCT4	sp|P50991|TCPD_HUMAN T-complex protein 1 subunit delta OS=Homo sapiens OX=9606 GN=CCT4 PE=1 SV=4	57.924	539	0	268.12	26964000	19479000	56964000	38511000	3869000	138520000	98490000	198800000	128760000	887	286;921;1318;1518;1752;3062;3834;4041;4135;4136;4143;4532;5410;5689;5902;6250;6404;7145;8133;8408;9600;10404;11331;11537;11687;12047;12998	920		368
P51148	Ras-related protein Rab-5C	RAB5C	sp|P51148|RAB5C_HUMAN Ras-related protein Rab-5C OS=Homo sapiens OX=9606 GN=RAB5C PE=1 SV=2	23.482	216	0	60.901	152110000	119110000	112110000	412200000	214170000	112240000	39789000	33841000	53835000	890	1206;3314;3803;4022;4422;4649;8152;8762;9371;11244;13586	921		11
P51153	Ras-related protein Rab-13	RAB13	sp|P51153|RAB13_HUMAN Ras-related protein Rab-13 OS=Homo sapiens OX=9606 GN=RAB13 PE=1 SV=1	22.774	203	0	21.599	66439000	56439000	16439000	36385000	6723000	46393000	0	0	0	893	1309;3233;3793;7509;7846;10445;10541;10995;11575	922		180
P52569	Cationic amino acid transporter 2	SLC7A2	sp|P52569|CTR2_HUMAN Cationic amino acid transporter 2 OS=Homo sapiens OX=9606 GN=SLC7A2 PE=1 SV=2	71.672	658	0	13.825	0	0	0	38132000	28393000	18138000	0	0	0	906	1603;5813;12565;13854	923		227
P53634	Dipeptidyl peptidase 1;Dipeptidyl peptidase 1 exclusion domain chain;Dipeptidyl peptidase 1 heavy chain;Dipeptidyl peptidase 1 light chain	CTSC	sp|P53634|CATC_HUMAN Dipeptidyl peptidase 1 OS=Homo sapiens OX=9606 GN=CTSC PE=1 SV=2	51.853	463	0	120.87	17766600	7766600	70766600	0	0	0	8389200	89020000	84006000	918	2015;2231;2232;4191;4573;4574;7031;7032;8416;9080;9883;9884;11168;13124;13450;13877	924;925		53;119
P53801	Pituitary tumor-transforming gene 1 protein-interacting protein	PTTG1IP	sp|P53801|PTTG_HUMAN Pituitary tumor-transforming gene 1 protein-interacting protein OS=Homo sapiens OX=9606 GN=PTTG1IP PE=1 SV=1	20.324	180	0	3.9661	0	0	0	0	0	0	16105200	61014600	6113500	920	6505;9271;11871	926		54
P54136	Arginine--tRNA ligase, cytoplasmic	RARS	sp|P54136|SYRC_HUMAN Arginine--tRNA ligase, cytoplasmic OS=Homo sapiens OX=9606 GN=RARS1 PE=1 SV=2	75.378	660	0	29.221	0	0	0	0	0	0	148473000	40548000	48539000	924	1328;1851;2861;3966;4357;4986;6134;6580;6854;7067;8450;10254;12730;13428	928		181
P54709	Sodium/potassium-transporting ATPase subunit beta-3	ATP1B3	sp|P54709|AT1B3_HUMAN Sodium/potassium-transporting ATPase subunit beta-3 OS=Homo sapiens OX=9606 GN=ATP1B3 PE=1 SV=1	31.512	279	0	69.39	36710000	136710000	13610000	0	0	0	0	0	0	928	2040;3467;4409;5275;5285;5483;6219;6409;7263;10287;10871	929;930;931;932	181	124;207;240;241	82
P54753	Ephrin type-B receptor 3	EPHB3	sp|P54753|EPHB3_HUMAN Ephrin type-B receptor 3 OS=Homo sapiens OX=9606 GN=EPHB3 PE=1 SV=2	110.33	998	0	74.406	0	0	0	50746000	60301000	99759000	0	0	0	930	3119;5433;7618;10312;10950;13424	933		445
P54802	Alpha-N-acetylglucosaminidase;Alpha-N-acetylglucosaminidase 82 kDa form;Alpha-N-acetylglucosaminidase 77 kDa form	NAGLU	sp|P54802|ANAG_HUMAN Alpha-N-acetylglucosaminidase OS=Homo sapiens OX=9606 GN=NAGLU PE=1 SV=2	82.265	743	0	32.169	0	0	0	0	0	0	61777000	31826000	11821000	932	15;4554;7082;9381;11159;12359	934;935		261;503
P55072	Transitional endoplasmic reticulum ATPase	VCP	sp|P55072|TERA_HUMAN Transitional endoplasmic reticulum ATPase OS=Homo sapiens OX=9606 GN=VCP PE=1 SV=4	89.321	806	0	323.31	96329000	66329000	166329000	27570000	259960000	25762000	22377000	224110000	124070000	939	480;490;491;1041;1188;2203;2380;3087;3104;4050;4051;4377;5458;6074;6232;6361;6744;6783;7346;8320;8554;8672;8673;9232;9233;9340;9821;12540;12541	939	182	680	550
P55268	Laminin subunit beta-2	LAMB2	sp|P55268|LAMB2_HUMAN Laminin subunit beta-2 OS=Homo sapiens OX=9606 GN=LAMB2 PE=1 SV=2	195.98	1798	0	323.31	0	0	0	65860000	164740000	658760000	183314000	83942000	83428000	943	410;630;771;864;911;929;939;942;1008;1345;1663;1737;1925;1996;2060;2158;2632;2729;3816;4271;4325;4404;4450;4451;4784;4785;4845;5087;5762;6094;6845;7045;7153;7739;7763;7766;9206;9538;9794;9796;9801;9812;10211;10630;11161;12649;12746;13741	941;942;943;944;945		1085;1249;1308;1348;1499
P56199	Integrin alpha-1	ITGA1	sp|P56199|ITA1_HUMAN Integrin alpha-1 OS=Homo sapiens OX=9606 GN=ITGA1 PE=1 SV=2	130.85	1179	0	43.396	157582000	50582000	57582000	0	0	0	0	0	0	949	3382;3623;4341;6471;6696;9154;9208;9209;9702;10342;10521;10905;13707	946;947;948;949;950;951;952;953		217;314;317;341;418;460;840;1113
P60033	CD81 antigen	CD81	sp|P60033|CD81_HUMAN CD81 antigen OS=Homo sapiens OX=9606 GN=CD81 PE=1 SV=1	25.809	236	0	119.01	174560000	374560000	274560000	1692400000	708100000	1092800000	663270000	363830000	163760000	957	5280;8389;9035;9036;9440;11408;11409	954;955;956		141;172;173
P60174	Triosephosphate isomerase	TPI1	sp|P60174|TPIS_HUMAN Triosephosphate isomerase OS=Homo sapiens OX=9606 GN=TPI1 PE=1 SV=4	26.669	249	0	130.75	51310000	15130000	151310000	150719000	71190000	50730000	77743000	37801000	7794000	958	1562;1563;2745;5251;5533;5534;6564;6565;10800;11268;12143;12144;12145;12497;13101;13162	957		72
P60842	Eukaryotic initiation factor 4A-I	EIF4A1	sp|P60842|IF4A1_HUMAN Eukaryotic initiation factor 4A-I OS=Homo sapiens OX=9606 GN=EIF4A1 PE=1 SV=1	46.153	406	0	179.47	91854000	61854000	21854000	112480000	193520000	312500000	499010000	209470000	299420000	962	1156;1641;1642;2741;3508;3989;4132;4133;4641;4730;5655;6176;6282;7676;7677;8378;9441;9930;10933;11267;12681;13197	961;962		26;28
P61026	Ras-related protein Rab-10	RAB10	sp|P61026|RAB10_HUMAN Ras-related protein Rab-10 OS=Homo sapiens OX=9606 GN=RAB10 PE=1 SV=1	22.541	200	0	43.813	29761000	23761000	3761000	9974000	91819000	94993000	2455000	24589000	29585000	973	330;331;840;841;3402;3795;6651;6665;7509;8855;10373;11810	963		93
P61224	Ras-related protein Rap-1b;Ras-related protein Rap-1b-like protein	RAP1B	sp|P61224|RAP1B_HUMAN Ras-related protein Rap-1b OS=Homo sapiens OX=9606 GN=RAP1B PE=1 SV=1;sp|A6NIZ1|RP1BL_HUMAN Ras-related protein Rap-1b-like protein OS=Homo sapiens OX=9606 PE=2 SV=1	20.825	184	0	191.8	6658000	60658000	160658000	0	0	0	0	0	0	980	2925;5715;6571;6572;8210;8815;8816;9721;9722;9770;10180;10181;10182;10607;12576;12577;13485	964		74
P61812	Transforming growth factor beta-2;Latency-associated peptide	TGFB2	sp|P61812|TGFB2_HUMAN Transforming growth factor beta-2 proprotein OS=Homo sapiens OX=9606 GN=TGFB2 PE=1 SV=1	47.747	414	0	50.224	0	0	0	0	0	0	1730000	6746000	10744000	995	242;2971;3307;5296;5847;8063	967;968;969		72;140;241
P62314	Small nuclear ribonucleoprotein Sm D1	SNRPD1	sp|P62314|SMD1_HUMAN Small nuclear ribonucleoprotein Sm D1 OS=Homo sapiens OX=9606 GN=SNRPD1 PE=1 SV=1	13.281	119	0	25.073	0	0	0	0	0	0	43352000	3304000	33398000	1016	7938;8827;9129	970		21
P62701	40S ribosomal protein S4, X isoform	RPS4X	sp|P62701|RS4X_HUMAN 40S ribosomal protein S4, X isoform OS=Homo sapiens OX=9606 GN=RPS4X PE=1 SV=2	29.597	263	0	74.243	6573000	265703000	65703000	0	0	0	8818000	188353000	88338000	1026	1522;2963;3302;3416;4168;7963;11322;11561;12788;12789;12946;13444	971		214
P62873	Guanine nucleotide-binding protein G(I)/G(S)/G(T) subunit beta-1	GNB1	sp|P62873|GBB1_HUMAN Guanine nucleotide-binding protein G(I)/G(S)/G(T) subunit beta-1 OS=Homo sapiens OX=9606 GN=GNB1 PE=1 SV=3	37.377	340	0	122.45	23710000	230710000	530710000	295810000	197630000	105850000	106980000	167240000	367210000	1041	209;424;2735;6015;6050;7105;7307;7308;7499;7500;7583;9692;10325;11023;11680;12462;12964	973		237
P62879	Guanine nucleotide-binding protein G(I)/G(S)/G(T) subunit beta-2	GNB2	sp|P62879|GBB2_HUMAN Guanine nucleotide-binding protein G(I)/G(S)/G(T) subunit beta-2 OS=Homo sapiens OX=9606 GN=GNB2 PE=1 SV=3	37.331	340	0	278.51	57230000	577230000	57730000	22660000	278260000	226210000	375880000	176150000	106120000	1042	144;208;424;2823;6015;6051;7058;7307;7308;7497;7498;7583;9691;10331;10333;11022;11426;11680;12462;12964	974		237
P62937	Peptidyl-prolyl cis-trans isomerase A;Peptidyl-prolyl cis-trans isomerase A, N-terminally processed	PPIA	sp|P62937|PPIA_HUMAN Peptidyl-prolyl cis-trans isomerase A OS=Homo sapiens OX=9606 GN=PPIA PE=1 SV=2	18.012	165	0	101.33	55540000	55440000	555440000	73010000	27540000	273060000	21030000	210360000	710320000	1049	773;2552;3379;5118;5119;6341;10576;11393;11394;12581;12813;12974	975;976	198	108;149	100
P63244	Guanine nucleotide-binding protein subunit beta-2-like 1;Guanine nucleotide-binding protein subunit beta-2-like 1, N-terminally processed	GNB2L1	sp|P63244|RACK1_HUMAN Receptor of activated protein C kinase 1 OS=Homo sapiens OX=9606 GN=RACK1 PE=1 SV=3	35.076	317	0	126.77	9310000	93310000	55440000	72940000	275470000	172990000	63370000	363920000	163860000	1066	272;1607;1846;2224;3636;4106;5008;5530;8056;8232;9431;11739;13266;13827	980		15
P68104	Elongation factor 1-alpha 1;Putative elongation factor 1-alpha-like 3	EEF1A1;EEF1A1P5	sp|P68104|EF1A1_HUMAN Elongation factor 1-alpha 1 OS=Homo sapiens OX=9606 GN=EEF1A1 PE=1 SV=1;sp|Q5VTE0|EF1A3_HUMAN Putative elongation factor 1-alpha-like 3 OS=Homo sapiens OX=9606 GN=EEF1A1P5 PE=5 SV=1	50.14	462	0	323.31	288660000	182660000	28266000	148610000	250920000	298670000	174730000	375310000	575240000	1073	1683;1684;2286;2588;5398;5434;6136;6137;6322;8329;8735;9014;9015;9564;9565;9706;9871;10408;11079;11498;11499;11529;11530;12304;13491;13492;13882	985;986;987;988;989	203	101;130;200;222;284	410
P78310	Coxsackievirus and adenovirus receptor	CXADR	sp|P78310|CXAR_HUMAN Coxsackievirus and adenovirus receptor OS=Homo sapiens OX=9606 GN=CXADR PE=1 SV=1	40.029	365	0	71.758	69184000	60184000	55440000	0	0	0	0	0	0	1080	8497;8682;10410;11184;11866;12102;12469	990;991		106;201
P78527	DNA-dependent protein kinase catalytic subunit	PRKDC	sp|P78527|PRKDC_HUMAN DNA-dependent protein kinase catalytic subunit OS=Homo sapiens OX=9606 GN=PRKDC PE=1 SV=3	469.08	4128	0	143.67	0	0	0	72940000	58090000	37568000	30140000	60233000	50222000	1087	397;1182;2780;2941;2946;3617;4207;4378;4489;5585;5667;5709;6174;6947;7165;7180;7519;7625;7839;8309;8368;8702;8872;8939;8967;9879;10490;10888;11084;12008;12096;12299;13215;13623;13867	993		3105
P98160	Basement membrane-specific heparan sulfate proteoglycan core protein;Endorepellin;LG3 peptide	HSPG2	sp|P98160|PGBM_HUMAN Basement membrane-specific heparan sulfate proteoglycan core protein OS=Homo sapiens OX=9606 GN=HSPG2 PE=1 SV=4	468.83	4391	0	323.31	121300000	1121300000	111300000	87366000	47806000	40376000	661320000	602330000	669220000	1101	86;105;155;252;253;287;377;401;469;471;472;674;794;806;914;948;949;963;1094;1107;1244;1282;1365;1379;1383;1384;1424;1438;1439;1440;1448;1457;2065;2217;2370;2422;2533;2598;2599;2921;2980;2994;3075;3161;3162;3283;3462;3483;3484;3550;3607;3608;3858;4071;4072;4115;4319;4373;4399;4448;4529;4689;4690;4811;4974;5043;5055;5060;5067;5068;5069;5072;5073;5211;5327;5328;5329;5330;5332;5333;5334;5335;5336;533…	999;1000;1001;1002;1003;1004;1005;1006;1007;1008;1009;1010;1011;1012;1013;1014;1015	211;212;213;214;215;216	89;210;294;554;658;1755;1811;2121;2547;2604;3072;3085;3780;3836;3855;4068;4083	702;712;1079;1483;2686;4069
Q00610	Clathrin heavy chain 1	CLTC	sp|Q00610|CLH1_HUMAN Clathrin heavy chain 1 OS=Homo sapiens OX=9606 GN=CLTC PE=1 SV=5	191.61	1675	0	323.31	89680000	18680000	389680000	663280000	467580000	403370000	368650000	969840000	769700000	1104	31;170;335;455;461;473;548;661;816;871;1005;1204;1287;1520;1521;2155;2328;2394;2428;2563;2597;2725;2726;2891;3010;3011;3097;3098;3290;3305;3515;3545;3546;4411;4412;4423;4456;4834;5022;5023;5103;5195;5441;5824;5825;5977;6212;6221;6270;6685;6716;6801;6883;7021;7022;7230;7442;7518;7737;8012;8013;8512;8959;8982;8983;9043;9825;9921;10006;10008;11097;11130;11137;11677;11898;12170;12171;12240;12404;1240…	1017;1018;1019		572;1457;1459
Q01813	ATP-dependent 6-phosphofructokinase, platelet type	PFKP	sp|Q01813|PFKAP_HUMAN ATP-dependent 6-phosphofructokinase, platelet type OS=Homo sapiens OX=9606 GN=PFKP PE=1 SV=2	85.595	784	0	146.78	55302000	15302000	25302000	89347000	8193000	80364000	139790000	129990000	229970000	1113	510;2635;2849;4077;4182;5475;6218;7636;8388;8438;8818;11511;11733;12418;13462;13650	1020;1021		151;348
Q01974	Tyrosine-protein kinase transmembrane receptor ROR2	ROR2	sp|Q01974|ROR2_HUMAN Tyrosine-protein kinase transmembrane receptor ROR2 OS=Homo sapiens OX=9606 GN=ROR2 PE=1 SV=2	104.76	943	0	17.535	29705000	35221000	24705000	0	0	0	0	0	0	1114	5881;10167;10827;11566;13582	1022		318
Q02809	Procollagen-lysine,2-oxoglutarate 5-dioxygenase 1	PLOD1	sp|Q02809|PLOD1_HUMAN Procollagen-lysine,2-oxoglutarate 5-dioxygenase 1 OS=Homo sapiens OX=9606 GN=PLOD1 PE=1 SV=2	83.549	727	0	170.54	276580000	121300000	476580000	375890000	479380000	305970000	509350000	355570000	395510000	1120	930;992;2931;3727;4486;4487;5127;5369;5744;5745;5760;7078;7797;8087;8233;8255;9237;9629;10924;10925;11956;12451;12457;13597;13627	1024;1025		197;538
Q03405	Urokinase plasminogen activator surface receptor	PLAUR	sp|Q03405|UPAR_HUMAN Urokinase plasminogen activator surface receptor OS=Homo sapiens OX=9606 GN=PLAUR PE=1 SV=1	36.978	335	0	219.98	168792000	68792000	78520000	193920000	403370000	103960000	79554000	74668000	7455000	1125	3837;3842;4356;4391;4392;5940;8225;8226;9113;10406;10816;10954;13645	1026;1027;1028;1029;1030	217	74;179;184;222;255	241
Q04721	Neurogenic locus notch homolog protein 2;Notch 2 extracellular truncation;Notch 2 intracellular domain	NOTCH2	sp|Q04721|NOTC2_HUMAN Neurogenic locus notch homolog protein 2 OS=Homo sapiens OX=9606 GN=NOTCH2 PE=1 SV=3	265.4	2471	0	61.034	5221000	3521000	35221000	5533000	55816000	155315000	0	0	0	1128	1715;2191;3753;6240;7246;8996;10169;10704	1031		46
Q06481	Amyloid-like protein 2	APLP2	sp|Q06481|APLP2_HUMAN Amyloid-like protein 2 OS=Homo sapiens OX=9606 GN=APLP2 PE=1 SV=2	86.955	763	0	110.77	0	0	0	0	0	0	718710000	319200000	519140000	1136	202;1414;2294;2473;8288;8367;8507;9697;9985;10222;10923;12591;12870	1032	220;221	541	157;530
Q07954	Prolow-density lipoprotein receptor-related protein 1;Low-density lipoprotein receptor-related protein 1 85 kDa subunit;Low-density lipoprotein receptor-related protein 1 515 kDa subunit;Low-density lipoprotein receptor-related protein 1 intracellular domain	LRP1	sp|Q07954|LRP1_HUMAN Prolow-density lipoprotein receptor-related protein 1 OS=Homo sapiens OX=9606 GN=LRP1 PE=1 SV=2	504.6	4544	0	154.73	0	0	0	0	0	0	79890000	60997000	69985000	1141	319;604;1106;1257;1385;1673;1701;3383;4521;6425;7235;8058;8275;8276;8392;8764;9168;9881;9967;10347;10455;10482;11488;12817;13403	1033;1034;1035;1036;1037;1038;1039;1040;1041;1042;1043;1044;1045;1046		446;729;1511;1575;1645;1763;1825;2117;2127;2620;3048;3089;3788;3839
Q08380	Galectin-3-binding protein	LGALS3BP	sp|Q08380|LG3BP_HUMAN Galectin-3-binding protein OS=Homo sapiens OX=9606 GN=LGALS3BP PE=1 SV=1	65.33	585	0	323.31	317880000	4178800000	3178800000	38560000	590150000	386640000	3606000000	1701700000	3701100000	1146	37;38;57;58;684;735;736;1050;1051;1202;1203;1498;1499;2829;2909;3537;3538;4272;4459;4838;5292;5797;5798;6035;6036;6037;6613;6648;6786;6787;6875;6929;9899;10115;10269;10426;10902;11053;11054;11076;11521;11673;12017;12286;13032;13624;13797;13874;13875	1047;1048;1049;1050;1051;1052;1053;1054;1055;1056	222;223;224;225;226	33;51;69;125;192;362;398;551;567;580	87;195;350;351;524
Q08431	Lactadherin;Lactadherin short form;Medin	MFGE8	sp|Q08431|MFGM_HUMAN Lactadherin OS=Homo sapiens OX=9606 GN=MFGE8 PE=1 SV=3	43.104	387	0	177.58	0	0	0	0	0	0	176360000	477090000	407010000	1147	405;2494;3169;3315;3316;4723;4943;5365;5627;6877;8621;8694;8778;8950;9045;9046;9056;9507;9969;12060;12203;12204;12205;13062	1057;1058;1059;1060;1061;1062;1063		34;64;165;228;238;325;329
Q08722	Leukocyte surface antigen CD47	CD47	sp|Q08722|CD47_HUMAN Leukocyte surface antigen CD47 OS=Homo sapiens OX=9606 GN=CD47 PE=1 SV=1	35.213	323	0	131.86	0	0	0	29690000	80430000	7707000	0	0	0	1148	1807;1808;2526;4469;4470;8321;10240;10241;11085;11086	1064;1065	227	73;111	100
Q10589	Bone marrow stromal antigen 2	BST2	sp|Q10589|BST2_HUMAN Bone marrow stromal antigen 2 OS=Homo sapiens OX=9606 GN=BST2 PE=1 SV=1	19.769	180	0	66.493	166140000	6610000	54209700	0	0	0	0	0	0	1158	4001;6679;6680;7756;9284	1066;1067		65;92
Q13200	26S proteasome non-ATPase regulatory subunit 2	PSMD2	sp|Q13200|PSMD2_HUMAN 26S proteasome non-ATPase regulatory subunit 2 OS=Homo sapiens OX=9606 GN=PSMD2 PE=1 SV=3	100.2	908	0	284.43	138380000	29902000	9902000	11520000	111540000	710540000	35690000	306160000	396100000	1178	251;1258;1811;2018;2359;3199;3221;3222;3365;3620;3913;6843;6844;7196;7638;8123;8339;8472;8481;8482;8742;9535;10366;10400;10518;11407;11568;12213;12433;12918;13545	1070		378
Q13433	Zinc transporter ZIP6	SLC39A6	sp|Q13433|S39A6_HUMAN Zinc transporter ZIP6 OS=Homo sapiens OX=9606 GN=SLC39A6 PE=1 SV=3	85.046	755	0	64.514	0	0	0	3197000	60477000	30203000	0	0	0	1192	5449;7575;9197;13508;13543;13544	1081;1082;1083;1084		67;266;283;288
Q13443	Disintegrin and metalloproteinase domain-containing protein 9	ADAM9	sp|Q13443|ADAM9_HUMAN Disintegrin and metalloproteinase domain-containing protein 9 OS=Homo sapiens OX=9606 GN=ADAM9 PE=1 SV=1	90.555	819	0	58.272	0	0	0	38392000	69027000	6407000	0	0	0	1195	4265;4819;8792;8795;9625;10918;10919;13837	1085;1086;1087		144;154;381
Q13641	Trophoblast glycoprotein	TPBG	sp|Q13641|TPBG_HUMAN Trophoblast glycoprotein OS=Homo sapiens OX=9606 GN=TPBG PE=1 SV=1	46.031	420	0	73.922	0	0	0	7637000	37987000	137645000	0	0	0	1209	1467;4960;8999;9000;10019;10020;10372;12671	1094;1095;1096;1097;1098		81;124;243;256;275
Q13740	CD166 antigen	ALCAM	sp|Q13740|CD166_HUMAN CD166 antigen OS=Homo sapiens OX=9606 GN=ALCAM PE=1 SV=2	65.102	583	0	287.47	0	0	0	307650000	181160000	377730000	58539000	20617000	50608000	1210	680;1888;2063;2852;3009;3693;5493;6390;6402;6627;7115;7116;7654;8657;8691;8692;9492;9971;10757;10998;11003;11138;11539;11540;12031;12032;12672;12673	1099;1100;1101;1102;1103;1104;1105;1106;1107;1108;1109	230	95;167;173;258;265;306;361;457;466;480;499	367
Q14103	Heterogeneous nuclear ribonucleoprotein D0	HNRNPD	sp|Q14103|HNRPD_HUMAN Heterogeneous nuclear ribonucleoprotein D0 OS=Homo sapiens OX=9606 GN=HNRNPD PE=1 SV=1	38.434	355	0	27.89	0	0	0	0	0	0	54401000	24439000	14434000	1217	2596;2988;3204;5090;8749	1110		163
Q14126	Desmoglein-2	DSG2	sp|Q14126|DSG2_HUMAN Desmoglein-2 OS=Homo sapiens OX=9606 GN=DSG2 PE=1 SV=2	122.29	1118	0	62.408	27287000	97287000	197287000	0	0	0	0	0	0	1220	1157;1962;2162;2961;4429;4550;5107;5290;5955;9214;10710;10987	1116		112
Q14204	Cytoplasmic dynein 1 heavy chain 1	DYNC1H1	sp|Q14204|DYHC1_HUMAN Cytoplasmic dynein 1 heavy chain 1 OS=Homo sapiens OX=9606 GN=DYNC1H1 PE=1 SV=5	532.4	4646	0	323.31	15429700	54029700	5429700	347217000	47656000	417227000	28390000	781080000	281030000	1225	193;463;581;660;668;686;743;1009;1198;1303;1304;1879;2047;2222;2340;2607;2690;2879;2880;2991;3150;3190;3569;3692;3732;3916;4313;4587;4629;4705;4826;4978;5185;5202;5207;5378;5546;5559;5575;5670;5761;6311;6392;6765;6839;6920;6981;7003;7016;7018;7085;7119;7144;7254;7394;7400;7511;7961;8181;8464;8490;8506;8613;8953;9187;9190;9360;9562;9601;9607;9608;9624;9689;10052;10134;10301;10328;10329;10374;10689…	1117		2954
Q14703	Membrane-bound transcription factor site-1 protease	MBTPS1	sp|Q14703|MBTP1_HUMAN Membrane-bound transcription factor site-1 protease OS=Homo sapiens OX=9606 GN=MBTPS1 PE=1 SV=1	117.75	1052	0	33.106	0	0	0	0	0	0	34378000	14400000	54397000	1243	765;766;7999	1122		939
Q14766	Latent-transforming growth factor beta-binding protein 1	LTBP1	sp|Q14766|LTBP1_HUMAN Latent-transforming growth factor beta-binding protein 1 OS=Homo sapiens OX=9606 GN=LTBP1 PE=1 SV=4	186.79	1721	0	45.366	0	0	0	0	0	0	39947000	31997000	61991000	1247	1461;2023;4957;5041;6124;10005;10621;10952;11859;12886;13849	1123		347
Q15043	Zinc transporter ZIP14	SLC39A14	sp|Q15043|S39AE_HUMAN Metal cation symporter ZIP14 OS=Homo sapiens OX=9606 GN=SLC39A14 PE=1 SV=3	54.212	492	0	22.53	29925000	29025000	49025000	0	0	0	0	0	0	1261	726;727;2030;4366;8995	1125;1126;1127		77;87;102
Q15262	Receptor-type tyrosine-protein phosphatase kappa	PTPRK	sp|Q15262|PTPRK_HUMAN Receptor-type tyrosine-protein phosphatase kappa OS=Homo sapiens OX=9606 GN=PTPRK PE=1 SV=2	162.1	1439	0	21.513	0	0	0	69674000	61237000	30687000	0	0	0	1272	899;7315;10441;13562	1130		462
Q15582	Transforming growth factor-beta-induced protein ig-h3	TGFBI	sp|Q15582|BGH3_HUMAN Transforming growth factor-beta-induced protein ig-h3 OS=Homo sapiens OX=9606 GN=TGFBI PE=1 SV=1	74.68	683	0	87.437	168380000	138380000	238380000	19482000	14616000	24485000	545780000	146010000	195980000	1288	116;520;3631;3850;4885;5594;6749;8843;9148;10714;11082;11634;12732;12740;12741;13577;13689	1131;1132;1133		207;272;361
Q15758	Neutral amino acid transporter B(0)	SLC1A5	sp|Q15758|AAAT_HUMAN Neutral amino acid transporter B(0) OS=Homo sapiens OX=9606 GN=SLC1A5 PE=1 SV=2	56.598	541	0	221.1	191450000	121450000	621450000	395840000	197650000	95880000	59200000	50277000	20268000	1291	1463;3133;4219;4368;4369;5189;5190;6406;7182;8863;10234;10235;10336;11036;11204;11205;12609;12865	1134;1135;1136		20;212;368
Q15818	Neuronal pentraxin-1	NPTX1	sp|Q15818|NPTX1_HUMAN Neuronal pentraxin-1 OS=Homo sapiens OX=9606 GN=NPTX1 PE=1 SV=2	47.122	432	0	157.59	326970000	126970000	626970000	0	0	0	0	0	0	1294	764;2000;3406;7036;7678;7679;7680;7707;11767;11872;12822	1137;1138		154;193
Q16394	Exostosin-1	EXT1	sp|Q16394|EXT1_HUMAN Exostosin-1 OS=Homo sapiens OX=9606 GN=EXT1 PE=1 SV=2	86.254	746	0	14.521	0	0	0	0	0	0	9052000	29096000	49091000	1302	2863;3666;3745;4878;5204;8668	1142		330
Q16610	Extracellular matrix protein 1	ECM1	sp|Q16610|ECM1_HUMAN Extracellular matrix protein 1 OS=Homo sapiens OX=9606 GN=ECM1 PE=1 SV=2	60.673	540	0	16.929	0	0	0	0	0	0	45179000	15203000	19200000	1310	2789;4931;9462;11495	1145;1146	232	354;444	445
Q16658	Fascin	FSCN1	sp|Q16658|FSCN1_HUMAN Fascin OS=Homo sapiens OX=9606 GN=FSCN1 PE=1 SV=3	54.529	493	0	23.956	284120000	214120000	144120000	0	0	0	0	0	0	1311	1146;6476;7327;12421;12780;13631;13662	1147		360
Q32P28	Prolyl 3-hydroxylase 1	LEPRE1	sp|Q32P28|P3H1_HUMAN Prolyl 3-hydroxylase 1 OS=Homo sapiens OX=9606 GN=P3H1 PE=1 SV=2	83.393	736	0	20.898	0	0	0	0	0	0	57006000	27048000	7043000	1324	1940;2713;12851;13198	1155;1156		316;540
Q5SZK8	FRAS1-related extracellular matrix protein 2	FREM2	sp|Q5SZK8|FREM2_HUMAN FRAS1-related extracellular matrix protein 2 OS=Homo sapiens OX=9606 GN=FREM2 PE=1 SV=2	351.15	3169	0	198.23	0	0	0	8370000	87172000	46389000	0	0	0	1340	213;1177;1769;2505;3432;3674;4872;5616;6034;8150;8495;10390;12045;12829;12977;13185;13772;13802	1170;1171;1172;1173;1174;1175;1176		1033;1584;1716;1741;2121;2236;2427
Q5T4S7	E3 ubiquitin-protein ligase UBR4	UBR4	sp|Q5T4S7|UBR4_HUMAN E3 ubiquitin-protein ligase UBR4 OS=Homo sapiens OX=9606 GN=UBR4 PE=1 SV=1	573.83	5183	0	131.04	0	0	0	7555000	30903000	37563000	60216000	68320000	48308000	1342	776;973;1093;2603;3012;3106;4087;4798;5033;5109;5945;6029;6087;6943;7342;8635;8647;8970;9047;9231;9336;10171;10204;10205;10727;10846;10984;11656;11910;11922;12113;12790;13381;13408	1177		4674
Q5ZPR3	CD276 antigen	CD276	sp|Q5ZPR3|CD276_HUMAN CD276 antigen OS=Homo sapiens OX=9606 GN=CD276 PE=1 SV=1	57.235	534	0	237.34	5929000	504929000	54929000	118440000	290470000	218490000	0	0	0	1348	1618;1936;2036;2037;4751;9075;9587;9588;10854;11237;12114;13189;13190	1181;1182;1183;1184;1185;1186		91;104;215;309;407;415
Q687X5	Metalloreductase STEAP4	STEAP4	sp|Q687X5|STEA4_HUMAN Metalloreductase STEAP4 OS=Homo sapiens OX=9606 GN=STEAP4 PE=1 SV=1	51.981	459	0	77.838	223580000	123580000	193580000	0	0	0	0	0	0	1350	338;2612;3477;5710;7177;7178;8462;11293;11964;11965	1187;1188		97;323
Q6P4A8	Phospholipase B-like 1;Phospholipase B-like 1 chain A;Phospholipase B-like 1 chain B;Phospholipase B-like 1 chain C	PLBD1	sp|Q6P4A8|PLBL1_HUMAN Phospholipase B-like 1 OS=Homo sapiens OX=9606 GN=PLBD1 PE=1 SV=2	63.254	553	0	69.382	0	0	0	165287000	65893000	75301000	0	0	0	1364	527;4610;5122;6031;7633;7634;8804;12116;13718;13719	1196;1197		71;411
Q6PCB0	von Willebrand factor A domain-containing protein 1	VWA1	sp|Q6PCB0|VWA1_HUMAN von Willebrand factor A domain-containing protein 1 OS=Homo sapiens OX=9606 GN=VWA1 PE=1 SV=1	46.804	445	0	101.41	0	0	0	0	0	0	51816000	81942000	89928000	1368	2495;2934;3879;4518;4970;5976;6910;8381;8714;10059;12309;13031	1200;1201		264;386
Q6PCB8	Embigin	EMB	sp|Q6PCB8|EMB_HUMAN Embigin OS=Homo sapiens OX=9606 GN=EMB PE=1 SV=1	36.881	327	0	20.874	0	0	0	145446000	40868000	45456000	0	0	0	1370	5928;8920;13843;13844	1202;1203		213;218
Q6UVK1	Chondroitin sulfate proteoglycan 4	CSPG4	sp|Q6UVK1|CSPG4_HUMAN Chondroitin sulfate proteoglycan 4 OS=Homo sapiens OX=9606 GN=CSPG4 PE=1 SV=2	250.53	2322	0	30.464	67115000	27115000	20115000	0	0	0	0	0	0	1372	414;722;5944;6977;7901;10389;12164	1205;1206;1207		1131;1202;2075
Q6UXG2	UPF0577 protein KIAA1324	KIAA1324	sp|Q6UXG2|ELAP1_HUMAN Endosome/lysosome-associated apoptosis and autophagy regulator 1 OS=Homo sapiens OX=9606 GN=ELAPOR1 PE=1 SV=2	111.38	1013	0	40.74	0	0	0	32100000	62676000	69113000	0	0	0	1373	6464;8534;8535;8853;10567;10770;11418;11938;11945	1208;1209		672;717
Q6UXI9	Nephronectin	NPNT	sp|Q6UXI9|NPNT_HUMAN Nephronectin OS=Homo sapiens OX=9606 GN=NPNT PE=2 SV=3	61.906	565	0	18.716	0	0	0	23687000	64278000	163700000	0	0	0	1374	3899;4862;12767;13069;13740	1210		273
Q6YHK3	CD109 antigen	CD109	sp|Q6YHK3|CD109_HUMAN CD109 antigen OS=Homo sapiens OX=9606 GN=CD109 PE=1 SV=2	161.69	1445	0	72.681	307151000	37551000	137151000	0	0	0	0	0	0	1375	2808;3490;3501;4176;4438;4984;6759;8336;9054;10784;10862;11203;11258;11259;11824;12520	1211;1212;1213;1214;1215;1216		41;68;247;419;513;1086
Q7KZF4	Staphylococcal nuclease domain-containing protein 1	SND1	sp|Q7KZF4|SND1_HUMAN Staphylococcal nuclease domain-containing protein 1 OS=Homo sapiens OX=9606 GN=SND1 PE=1 SV=1	102	910	0	40.956	0	0	0	0	0	0	2819000	28764000	48759000	1384	407;724;856;2236;2280;3041;6699;7011;8586;12703;12772;13763	1222;1223		281;283
Q7L5N1	COP9 signalosome complex subunit 6	COPS6	sp|Q7L5N1|CSN6_HUMAN COP9 signalosome complex subunit 6 OS=Homo sapiens OX=9606 GN=COPS6 PE=1 SV=1	36.163	327	0	25.567	0	0	0	0	0	0	6601500	166116000	66105000	1389	8540;8862	1224;1225		80;85
Q86VE9	Serine incorporator 5	SERINC5	sp|Q86VE9|SERC5_HUMAN Serine incorporator 5 OS=Homo sapiens OX=9606 GN=SERINC5 PE=2 SV=1	47.009	423	0	44.903	0	0	0	132260000	83950000	182290000	0	0	0	1405	1350;2595;5610;9285;9297;11010;13422;13840	1242		294
Q86YQ8	Copine-8	CPNE8	sp|Q86YQ8|CPNE8_HUMAN Copine-8 OS=Homo sapiens OX=9606 GN=CPNE8 PE=1 SV=2	63.107	564	0	81.073	28560000	128560000	228500000	0	0	0	3582900	2586900	12586400	1418	1217;1616;1698;1802;2477;2998;4150;4446;4815;5837;6828;7025;9194;10279;10446;10771;10845;11136;11545;13433;13458;13721;13722	1247		384
Q8IWA5	Choline transporter-like protein 2	SLC44A2	sp|Q8IWA5|CTL2_HUMAN Choline transporter-like protein 2 OS=Homo sapiens OX=9606 GN=SLC44A2 PE=1 SV=3	80.123	706	0	166.84	0	0	0	97684000	9859000	90705000	0	0	0	1423	837;1431;3864;3912;4640;4677;4678;4679;4895;6089;6481;6482;6504;6691;7536;7854;8648;8727;8728;8760;8893;11301;13686	1249;1250;1251;1252	239	187;200;212;417	184
Q8IWU5	Extracellular sulfatase Sulf-2	SULF2	sp|Q8IWU5|SULF2_HUMAN Extracellular sulfatase Sulf-2 OS=Homo sapiens OX=9606 GN=SULF2 PE=1 SV=1	100.45	870	0	82.035	0	0	0	6918000	13038000	1292100	0	0	0	1428	283;3740;3741;4891;6584;8882;11400;13669;13842	1254;1255;1256;1257;1258;1259;1260		65;112;132;149;171;177;198
Q8N271	Prominin-2	PROM2	sp|Q8N271|PROM2_HUMAN Prominin-2 OS=Homo sapiens OX=9606 GN=PROM2 PE=1 SV=1	91.882	834	0	69.605	0	0	0	5708000	60262000	89721000	0	0	0	1437	671;672;2860;4691;5636;6480;7885;8888;9272;11907	1263;1264;1265;1266;1267		343;352;540;707;725
Q8NBI5	Solute carrier family 43 member 3	SLC43A3	sp|Q8NBI5|S43A3_HUMAN Solute carrier family 43 member 3 OS=Homo sapiens OX=9606 GN=SLC43A3 PE=1 SV=2	54.528	491	0	118.18	278970000	178970000	128560000	0	0	0	0	0	0	1448	1866;2453;2454;2469;2470;2481;2482;3037;3038;4100;4101;11413	1275;1276		56;229
Q8NBP7	Proprotein convertase subtilisin/kexin type 9	PCSK9	sp|Q8NBP7|PCSK9_HUMAN Proprotein convertase subtilisin/kexin type 9 OS=Homo sapiens OX=9606 GN=PCSK9 PE=1 SV=3	74.285	692	0	14.779	0	0	0	0	0	0	69261000	61355000	31344000	1451	436;1354;2369;4634;4635;9953;12467	1280		533
Q8NHP8	Putative phospholipase B-like 2;Putative phospholipase B-like 2 32 kDa form;Putative phospholipase B-like 2 45 kDa form	PLBD2	sp|Q8NHP8|PLBL2_HUMAN Putative phospholipase B-like 2 OS=Homo sapiens OX=9606 GN=PLBD2 PE=1 SV=2	65.471	589	0	19.158	0	0	0	3841000	13969000	19844000	0	0	0	1465	9110;10271;10494;12736	1283;1284		465;515
Q8WTV0	Scavenger receptor class B member 1	SCARB1	sp|Q8WTV0|SCRB1_HUMAN Scavenger receptor class B member 1 OS=Homo sapiens OX=9606 GN=SCARB1 PE=1 SV=1	60.877	552	0	42.516	48120000	15210000	38120000	0	0	0	0	0	0	1477	2962;4954;5298;5451;7800;10782;11090;11632	1290;1291;1292;1293;1294;1295		102;107;108;238;310;330
Q8WUJ3	Cell migration-inducing and hyaluronan-binding protein	CEMIP	sp|Q8WUJ3|CEMIP_HUMAN Cell migration-inducing and hyaluronan-binding protein OS=Homo sapiens OX=9606 GN=CEMIP PE=1 SV=2	153	1361	0	97.02	0	0	0	0	0	0	32919000	93062000	99045000	1479	53;1944;4172;4349;4626;4763;4928;6758;7659;8001;10467;10519;11055;12140;12331;13793	1296;1297;1298;1299		119;165;889;921
Q8WWI5	Choline transporter-like protein 1	SLC44A1	sp|Q8WWI5|CTL1_HUMAN Choline transporter-like protein 1 OS=Homo sapiens OX=9606 GN=SLC44A1 PE=1 SV=1	73.301	657	0	125.53	15953000	15053000	5000000	189250000	111000000	89290000	0	0	0	1486	1489;2319;2498;2499;2787;3086;3198;3232;3237;3838;7734;8184;8977;12695;13699	1301		135
Q92485	Acid sphingomyelinase-like phosphodiesterase 3b	SMPDL3B	sp|Q92485|ASM3B_HUMAN Acid sphingomyelinase-like phosphodiesterase 3b OS=Homo sapiens OX=9606 GN=SMPDL3B PE=1 SV=2	50.813	455	0	86.031	0	0	0	19950000	110970000	329970000	0	0	0	1492	1152;1972;5208;6002;7118;7711;9091;12498;13325;13883	1306;1307		164;343
Q92542	Nicastrin	NCSTN	sp|Q92542|NICA_HUMAN Nicastrin OS=Homo sapiens OX=9606 GN=NCSTN PE=1 SV=2	78.41	709	0	105.37	47007000	57157000	50157000	72759000	53249000	32770000	0	0	0	1495	629;770;857;4200;6346;7590;8616;8887;9120;10016;10398;11189;11904;13240	1308;1309;1310;1311;1312;1313;1314;1315		45;387;417;435;530;562;573;580
Q92626	Peroxidasin homolog	PXDN	sp|Q92626|PXDN_HUMAN Peroxidasin homolog OS=Homo sapiens OX=9606 GN=PXDN PE=1 SV=2	165.27	1479	0	323.31	790370000	71070000	710370000	37434000	377820000	474420000	39460000	794660000	394590000	1502	244;305;371;830;1602;1657;1708;1709;2932;3367;3603;3888;4073;4225;4226;4466;5006;5248;5573;5574;5595;5737;5738;5834;5908;5909;5936;5968;6342;6957;6986;7096;7648;7663;7863;7992;8753;8805;8806;9039;9220;9447;9964;10113;10434;10842;11491;11501;11636;12067;12068;12806;12856;12921;13145;13183;13271;13279;13280;13517;13690;13735	1318;1319;1320;1321;1322;1323;1324;1325	248;249	619;640;730;731;904;1178;1280;1368	960;1146
Q92896	Golgi apparatus protein 1	GLG1	sp|Q92896|GSLG1_HUMAN Golgi apparatus protein 1 OS=Homo sapiens OX=9606 GN=GLG1 PE=1 SV=2	134.55	1179	0	107.43	0	0	0	10530000	194490000	103550000	0	0	0	1512	142;580;741;1503;1798;3276;4335;4746;6796;7123;7441;8002;8539;9579	1328;1329		210;677
Q969P0	Immunoglobulin superfamily member 8	IGSF8	sp|Q969P0|IGSF8_HUMAN Immunoglobulin superfamily member 8 OS=Homo sapiens OX=9606 GN=IGSF8 PE=1 SV=1	65.033	613	0	230.92	597850000	267850000	517850000	59486000	52973000	72497000	19228000	30244000	10242000	1523	1234;1235;2179;3951;4775;5124;5419;6771;7253;7747;7780;7864;8091;8565;8612;10268;10947;10948;11063;13143;13659	1331;1332		327;463
Q99523	Sortilin	SORT1	sp|Q99523|SORT_HUMAN Sortilin OS=Homo sapiens OX=9606 GN=SORT1 PE=1 SV=3	92.067	831	0	78.286	0	0	0	36167000	76874000	70183000	0	0	0	1571	1791;3460;5009;6511;6856;8444;8697;8788;8800	1345;1346;1347		98;162;406
Q99536	Synaptic vesicle membrane protein VAT-1 homolog	VAT1	sp|Q99536|VAT1_HUMAN Synaptic vesicle membrane protein VAT-1 homolog OS=Homo sapiens OX=9606 GN=VAT1 PE=1 SV=2	41.92	393	0	12.252	0	0	0	0	0	0	14279000	64378000	24367000	1572	4825;9461;12001;13239	1348		232
Q99715	Collagen alpha-1(XII) chain	COL12A1	sp|Q99715|COCA1_HUMAN Collagen alpha-1(XII) chain OS=Homo sapiens OX=9606 GN=COL12A1 PE=1 SV=2	333.14	3063	0	323.31	654520000	254520000	54520000	0	0	0	1961000	10978000	19976000	1581	637;1336;1550;1765;1905;1938;1941;2017;2157;2268;2321;3173;3410;3411;3523;3675;4055;4318;4536;4637;5331;5431;5469;5537;5538;5820;5870;5899;5949;5951;5966;6228;6335;6588;7124;7185;7328;7353;7380;7539;7848;8000;8398;8442;8443;8650;8963;9137;9138;9235;9472;9716;10046;10114;10129;10326;10690;10744;10745;10872;10873;10874;11358;11359;11395;11630;11651;11686;11763;11820;12085;12152;12333;12455;12456;12…	1350;1351;1352	252	2528;2571;2679	2523
Q99808	Equilibrative nucleoside transporter 1	SLC29A1	sp|Q99808|S29A1_HUMAN Equilibrative nucleoside transporter 1 OS=Homo sapiens OX=9606 GN=SLC29A1 PE=1 SV=3	50.219	456	0	86.039	0	0	0	38571000	28836000	78577000	0	0	0	1587	390;2464;6974;7015;8118;10983;13374;13375;13519	1355;1356	253	48;272	45
Q99985	Semaphorin-3C	SEMA3C	sp|Q99985|SEM3C_HUMAN Semaphorin-3C OS=Homo sapiens OX=9606 GN=SEMA3C PE=2 SV=2	85.206	751	0	53.207	4232000	42332000	22332000	5005000	50469000	70016000	0	0	0	1596	2558;6560;8633;8634;9050;9646;11135;12552;12642;13246;13247	1360;1361;1362;1363;1364		123;465;466;585;586
Q9BTY2	Plasma alpha-L-fucosidase	FUCA2	sp|Q9BTY2|FUCO2_HUMAN Plasma alpha-L-fucosidase OS=Homo sapiens OX=9606 GN=FUCA2 PE=1 SV=2	54.066	467	0	20.158	0	0	0	0	0	0	35527000	15551000	5548000	1613	529;1800;3373;4868;7468;8218;10906;13612	1367;1368		171;377
Q9BVA1	Tubulin beta-2B chain;Tubulin beta-2A chain	TUBB2B;TUBB2A	sp|Q9BVA1|TBB2B_HUMAN Tubulin beta-2B chain OS=Homo sapiens OX=9606 GN=TUBB2B PE=1 SV=1;sp|Q13885|TBB2A_HUMAN Tubulin beta-2A chain OS=Homo sapiens OX=9606 GN=TUBB2A PE=1 SV=1	49.953	445	0	7.8284	0	0	0	0	0	0	1888000	18837000	38833000	1617	3103;3531;3532;3722;4121;4122;5795;5814;6372;6904;7224;8068;8069;8520;8521;8522;8532;9017;9163;10448;11272;12968;13684	432	76;95;96;208	226	233;321;323;363
Q9C0H2	Protein tweety homolog 3	TTYH3	sp|Q9C0H2|TTYH3_HUMAN Protein tweety homolog 3 OS=Homo sapiens OX=9606 GN=TTYH3 PE=1 SV=3	57.544	523	0	88.492	52112000	82112000	89112000	6524000	65830000	35238000	0	0	0	1641	789;4375;8572;9872;11988;12894;13263	1379;1380		144;351
Q9GZM7	Tubulointerstitial nephritis antigen-like	TINAGL1	sp|Q9GZM7|TINAL_HUMAN Tubulointerstitial nephritis antigen-like OS=Homo sapiens OX=9606 GN=TINAGL1 PE=1 SV=1	52.387	467	0	165.1	0	0	0	0	0	0	38080000	138290000	198270000	1643	166;545;1449;1594;2810;2957;4465;4685;4894;5905;6959;7198;7204;9373;9893;12037;12982;13472;13861	1383;1384		78;161
Q9H0X4	Protein ITFG3	ITFG3	sp|Q9H0X4|F234A_HUMAN Protein FAM234A OS=Homo sapiens OX=9606 GN=FAM234A PE=1 SV=1	59.659	552	0	74.82	8882000	88812000	68812000	649660000	251980000	24710000	0	0	0	1654	2474;4524;9198;10152;10280;10281;13073;13074;13628;13668	1387;1388;1389;1390		116;120;314;389
Q9H4F8	SPARC-related modular calcium-binding protein 1	SMOC1	sp|Q9H4F8|SMOC1_HUMAN SPARC-related modular calcium-binding protein 1 OS=Homo sapiens OX=9606 GN=SMOC1 PE=1 SV=1	48.162	434	0	98.303	82112000	139590000	13959000	0	0	0	0	0	0	1672	2101;3613;5004;6455;9140;9672;11852;11932;13181;13305	1393		214
Q9H5V8	CUB domain-containing protein 1	CDCP1	sp|Q9H5V8|CDCP1_HUMAN CUB domain-containing protein 1 OS=Homo sapiens OX=9606 GN=CDCP1 PE=1 SV=3	92.931	836	0	64.137	0	0	0	0	0	0	1857000	58535000	18532000	1674	3013;4276;4937;5273;5426;7207;7778;7779;7817;9273;10477;11200;11305	1394;1395;1396;1397;1398;1399;1400;1401		39;180;205;339;342;386;477;577
Q9HAV0	Guanine nucleotide-binding protein subunit beta-4	GNB4	sp|Q9HAV0|GBB4_HUMAN Guanine nucleotide-binding protein subunit beta-4 OS=Homo sapiens OX=9606 GN=GNB4 PE=1 SV=3	37.567	340	0	121.33	45910000	454910000	954910000	3488000	13613000	1349000	18164800	8977300	8175900	1685	150;207;424;2823;6016;6054;7307;7501;7583;8390;9098;9674;10331;10332;11023;11427;11428;11429;11680	1406		237
Q9HB63	Netrin-4	NTN4	sp|Q9HB63|NET4_HUMAN Netrin-4 OS=Homo sapiens OX=9606 GN=NTN4 PE=1 SV=2	70.07	628	0	62.191	0	0	0	60252000	67876000	37266000	0	0	0	1688	5031;6448;8732;10429;13514	1407;1408		56;163
Q9HC84	Mucin-5B	MUC5B	sp|Q9HC84|MUC5B_HUMAN Mucin-5B OS=Homo sapiens OX=9606 GN=MUC5B PE=1 SV=3	596.33	5762	0	27.467	0	0	0	107987000	18154000	77991000	0	0	0	1694	311;913;3375;7103;13448;13764	1411;1412;1413		201;4960;5111
Q9HCU4	Cadherin EGF LAG seven-pass G-type receptor 2	CELSR2	sp|Q9HCU4|CELR2_HUMAN Cadherin EGF LAG seven-pass G-type receptor 2 OS=Homo sapiens OX=9606 GN=CELSR2 PE=1 SV=1	317.45	2923	0	169.5	0	0	0	6933000	62508000	21947000	0	0	0	1698	650;2147;2538;3381;3969;3983;4328;4717;4921;5036;5167;7225;7426;7829;8686;12201;12441;13083	1414;1415;1416;1417;1418;1419;1420;1421;1422;1423		1036;1076;1182;1501;1565;1741;1900;2024;2043;2061
Q9HCY8	Protein S100-A14	S100A14	sp|Q9HCY8|S10AE_HUMAN Protein S100-A14 OS=Homo sapiens OX=9606 GN=S100A14 PE=1 SV=1	11.662	104	0	123.56	0	0	0	31125000	414140000	311310000	0	0	0	1699	1956;3064;5223;5224;8784;8785;10185;10186;10393;11118	1424		28
Q9NZM1	Myoferlin	MYOF	sp|Q9NZM1|MYOF_HUMAN Myoferlin OS=Homo sapiens OX=9606 GN=MYOF PE=1 SV=1	234.71	2061	0	129.93	8633000	83633000	56213000	0	0	0	5219000	85350000	25335000	1743	873;895;1601;2057;2298;3370;4169;4946;5654;5720;5877;6183;7300;7840;8793;8964;10694;10723;11937;12536;12762;12800;13300	1439		1207
Q9P265	Disco-interacting protein 2 homolog B	DIP2B	sp|Q9P265|DIP2B_HUMAN Disco-interacting protein 2 homolog B OS=Homo sapiens OX=9606 GN=DIP2B PE=1 SV=3	171.49	1576	0	81.893	0	0	0	8487000	89969000	84205000	0	0	0	1752	532;915;2476;2573;4628;6004;6307;6851;6852;9115;9183;10000;10022;10559;11312;11318;11487;12709	1443		700
Q9P2B2	Prostaglandin F2 receptor negative regulator	PTGFRN	sp|Q9P2B2|FPRP_HUMAN Prostaglandin F2 receptor negative regulator OS=Homo sapiens OX=9606 GN=PTGFRN PE=1 SV=2	98.555	879	0	323.31	373340000	273340000	20000000	140400000	1990000000	1040600000	0	0	0	1755	126;127;171;762;905;919;920;1400;1446;1447;2108;2213;2238;2250;2290;2291;2303;2524;2610;2753;2754;2895;3398;3688;3927;6982;6988;7042;7043;7044;7828;8491;8631;9279;9280;9622;9665;10070;10071;10077;10079;10272;10277;10278;10412;10588;10855;11119;11182;11247;11935;12123;12124;12233;12234;12613;12840;12861;12885;13023;13585;13598;13599;13600;13804;13805	1445;1446;1447;1448;1449;1450;1451;1452;1453;1454	264	286;300;367;383;413;525;526;600;618;691	588
Q9UBX1	Cathepsin F	CTSF	sp|Q9UBX1|CATF_HUMAN Cathepsin F OS=Homo sapiens OX=9606 GN=CTSF PE=1 SV=1	53.365	484	0	13.436	0	0	0	0	0	0	44780000	14803000	1000000	1771	1241;4570;8798;8799;9875;10297;12074	1457		195
Q9UGT4	Sushi domain-containing protein 2	SUSD2	sp|Q9UGT4|SUSD2_HUMAN Sushi domain-containing protein 2 OS=Homo sapiens OX=9606 GN=SUSD2 PE=1 SV=1	90.207	822	0	100.24	0	0	0	299850000	221890000	419890000	0	0	0	1777	971;3338;3958;4592;6924;10339;12149;13565	1459;1460	270	162;494	492
Q9UKU9	Angiopoietin-related protein 2	ANGPTL2	sp|Q9UKU9|ANGL2_HUMAN Angiopoietin-related protein 2 OS=Homo sapiens OX=9606 GN=ANGPTL2 PE=1 SV=1	57.104	493	0	19.515	0	0	0	0	0	0	18456100	8469100	80467600	1795	5622;13107;13747	1470;1471		164;192
Q9UL25	Ras-related protein Rab-21	RAB21	sp|Q9UL25|RAB21_HUMAN Ras-related protein Rab-21 OS=Homo sapiens OX=9606 GN=RAB21 PE=1 SV=3	24.347	225	0	66.569	304306000	62415000	34306000	850214000	86005000	185232000	128102000	208145000	28140000	1799	6;592;4134;4938;5157;13192	1473		193
Q9ULF5	Zinc transporter ZIP10	SLC39A10	sp|Q9ULF5|S39AA_HUMAN Zinc transporter ZIP10 OS=Homo sapiens OX=9606 GN=SLC39A10 PE=1 SV=2	94.131	831	0	83.502	82975000	142975000	40005000	0	0	0	0	0	0	1803	1919;6725;6926;7579;9613	1474		339
Q9Y2E5	Epididymis-specific alpha-mannosidase	MAN2B2	sp|Q9Y2E5|MA2B2_HUMAN Epididymis-specific alpha-mannosidase OS=Homo sapiens OX=9606 GN=MAN2B2 PE=1 SV=4	113.98	1009	0	20.693	0	0	0	0	0	0	186476000	86609000	36594000	1837	1024;1307;10038;13314;13799	1483;1484		748;890
Q9Y3L5	Ras-related protein Rap-2c;Ras-related protein Rap-2a	RAP2C;RAP2A	sp|Q9Y3L5|RAP2C_HUMAN Ras-related protein Rap-2c OS=Homo sapiens OX=9606 GN=RAP2C PE=1 SV=1;sp|P10114|RAP2A_HUMAN Ras-related protein Rap-2a OS=Homo sapiens OX=9606 GN=RAP2A PE=1 SV=1	20.745	183	0	176.28	3073000	30473000	130473000	409550000	443630000	39640000	0	0	0	1851	641;1961;2627;6186;8817;9597;10183;10184;10613;10762;12850;13243	965		74
Q9Y4K0	Lysyl oxidase homolog 2	LOXL2	sp|Q9Y4K0|LOXL2_HUMAN Lysyl oxidase homolog 2 OS=Homo sapiens OX=9606 GN=LOXL2 PE=1 SV=1	86.724	774	0	323.31	34470000	110470000	340470000	17972600	8046600	9974300	601000000	20110000	201270000	1857	533;1036;1444;2777;3298;3512;3644;3645;3924;4028;4029;4802;5091;5111;5112;5183;5184;5724;6010;6011;6012;6115;6213;7183;7184;7188;7631;7855;7856;8807;9079;9304;9558;9559;9670;9911;10089;10536;10953;11167;12307;12308;12310;13199;13859	1486;1487;1488;1489;1490;1491;1492;1493;1494;1495;1496	273;274	141;170;288;293;344;415;438;606;615;642;644	632;743
Q9Y4L1	Hypoxia up-regulated protein 1	HYOU1	sp|Q9Y4L1|HYOU1_HUMAN Hypoxia up-regulated protein 1 OS=Homo sapiens OX=9606 GN=HYOU1 PE=1 SV=1	111.33	999	0	68.929	0	0	0	43220000	3436000	83225000	3680000	136866000	36860000	1858	449;1249;7894;8877;12024;12336;12716;12842;13781	1497;1498		515;830
Q9Y5L3	Ectonucleoside triphosphate diphosphohydrolase 2	ENTPD2	sp|Q9Y5L3|ENTP2_HUMAN Ectonucleoside triphosphate diphosphohydrolase 2 OS=Homo sapiens OX=9606 GN=ENTPD2 PE=1 SV=1	53.665	495	0	79.917	0	0	0	3294000	3392000	32101000	0	0	0	1863	1034;4010;4736;5638;6790;7537	1499;1500	275	129;292	141
Q9Y5X9	Endothelial lipase	LIPG	sp|Q9Y5X9|LIPE_HUMAN Endothelial lipase OS=Homo sapiens OX=9606 GN=LIPG PE=1 SV=1	56.794	500	0	32.401	0	0	0	0	0	0	55692000	95731000	25727000	1864	1223;1523;7968;11192;11903	1501;1502		80;136
Q9Y5Y6	Suppressor of tumorigenicity 14 protein	ST14	sp|Q9Y5Y6|ST14_HUMAN Suppressor of tumorigenicity 14 protein OS=Homo sapiens OX=9606 GN=ST14 PE=1 SV=2	94.769	855	0	138.89	0	0	0	89040000	190800000	18980000	0	0	0	1865	577;2282;3280;3401;3436;4347;5368;5923;8476;10886;11826;12542;13771	1503;1504		109;772
Q9Y624	Junctional adhesion molecule A	F11R	sp|Q9Y624|JAM1_HUMAN Junctional adhesion molecule A OS=Homo sapiens OX=9606 GN=F11R PE=1 SV=1	32.583	299	0	91.771	0	0	0	13580000	132800000	331610000	0	0	0	1867	346;1250;2435;6692;7349;8094;11148	1505		185
Q9Y639	Neuroplastin	NPTN	sp|Q9Y639|NPTN_HUMAN Neuroplastin OS=Homo sapiens OX=9606 GN=NPTN PE=1 SV=2	44.387	398	0	104.05	16640000	785640000	106640000	5370000	54206000	73719000	49109000	64177000	44169000	1868	85;228;229;2113;5998;5999;6356;6468;6583;8681;8828;10344	1506;1507;1508;1509;1510;1511		171;187;197;229;276;284
Q9Y653	G-protein coupled receptor 56;GPR56 N-terminal fragment;GPR56 C-terminal fragment	GPR56	sp|Q9Y653|AGRG1_HUMAN Adhesion G-protein coupled receptor G1 OS=Homo sapiens OX=9606 GN=ADGRG1 PE=1 SV=2	77.737	693	0	64.125	0	0	0	6465000	61027000	30478000	0	0	0	1869	3505;5841;7530;7809;7873;9288;12166;12664	1512;1513;1514;1515		234;303;324;341
Q9Y678	Coatomer subunit gamma-1	COPG1	sp|Q9Y678|COPG1_HUMAN Coatomer subunit gamma-1 OS=Homo sapiens OX=9606 GN=COPG1 PE=1 SV=1	97.717	874	0	121.21	0	0	0	69740000	63322000	162753000	33984000	64082000	6471000	1870	570;740;2738;2868;3054;5662;7514;7628;8913;9185;9357;10266;10522;10999;12351;13188;13413	1516		549
Q9Y6M7	Sodium bicarbonate cotransporter 3	SLC4A7	sp|Q9Y6M7|S4A7_HUMAN Sodium bicarbonate cotransporter 3 OS=Homo sapiens OX=9606 GN=SLC4A7 PE=1 SV=2	136.04	1214	0	22.822	2564000	225364000	25364000	0	0	0	0	0	0	1876	5741;6148;6334;10523	1517		786

## Sheet: Hela-Exo
Sequence	# PSMs	Protein Group Accessions	Modifications	q-Value	PEP	IonScore	Exp Value	Charge	MH+ [Da]	ΔM [ppm]	RT [min]	# Missed Cleavages
NLHQSnTSR	2	P98160	N6(Deamidated)	0	0.0001855	45.84	0.00015246	2	1057.5	0.217148	3.22588	0
NLHQSnTSRAELLVTEAPSKPITVTVEEQR	3	P98160	N6(Deamidated)	0	6.043e-12	53.52	4.93541e-05	4	3348.74	0.399593	26.8015	1
ALVnFTR	1	P98160	N4(Deamidated)	0.004	0.1071	41.91	0.000853524	2	821.451	-0.261392	25.5943	0
VEnGSGPK	1	P98160	N3(Deamidated)	0.001	0.01846	27.83	0.00683987	2	788.378	-0.684968	2.75901	0
GVnVTMPAQPGTPPLSSTQLQIDPSLHEFQLVDLSR	1	P98160	N3(Deamidated)	0	4.405e-08	36.39	0.00243392	3	3873.99	4.54423	46.7552	0
GVnVTMPAQPGTPPLSSTQLQIDPSLHEFQLVDLSRR	1	P98160	N3(Deamidated)	0	1.143e-08	33.38	0.00445422	4	4030.08	3.58113	42.6465	1
SQGLNLHTLLYLGGVEPSVPLSPATnMSAHFR	2	P98160	N26(Deamidated)	0	1.768e-13	89.23	1.67755e-08	3	3407.75	2.47669	42.7026	0
SLTQGSLIVGDLAPVnGTSQGK	2	P98160	N16(Deamidated)	0	3.955e-10	91.7	9.70179e-09	2	2143.13	2.44261	37.2465	0
TRNQELEDNVHISPnGSIITIVGTRPSNHGTYR	1	P98160	N15(Deamidated)	0	2.495e-07	21.21	0.119201	4	3676.85	1.37121	26.6556	1
NQELEDNVHISPnGSIITIVGTRPSNHGTYR	2	P98160	N13(Deamidated)	0	9.813e-10	66.88	3.01521e-06	3	3419.7	2.95855	29.0907	0
IQGEEIVFHDLnLTAHGISHcPTcR	1	P98160	N12(Deamidated); C21(Carbamidomethyl); C24(Carbamidomethyl)	0	6.311e-12	28.82	0.0212576	4	2905.37	0.88429	30.1648	0
SSPGKSQGLnLHTLLYLGGVEPSVPLSPATnMSAHFR	1	P98160	N10(Deamidated); N31(Deamidated)	0	8.514e-09	40.87	0.000883942	4	3864.98	6.08058	38.5098	1
LRLPQVSPADSGEYVcRVEnGSGPK	1	P98160	C16(Carbamidomethyl); N20(Deamidated)	0	1.64e-12	43.77	0.000776554	3	2716.34	2.51711	27.4949	2
eEEIAALVIDnGSGmcK	1	P63261	N-Term(Acetyl); N11(Deamidated); M15(Oxidation); C16(Carbamidomethyl)	0	3.995e-08	44.82	0.000220839	2	1894.84	-0.575221	50.0652	0
eEEIAALVIDnGSGMcK	1	P63261	N-Term(Acetyl); N11(Deamidated); C16(Carbamidomethyl)	0	4.339e-10	67.78	1.49219e-06	2	1878.85	-0.492818	52.3599	0
dDDIAALVVDnGSGMcK	1	P60709	N-Term(Acetyl); N11(Deamidated); C16(Carbamidomethyl)	0	6.215e-07	65.17	2.15903e-06	2	1822.79	1.15415	50.4589	0
TEVSSnHVLIYLDKVSnQTLSLFFTVLQDVPVR	2	P01023	N6(Deamidated); N17(Deamidated)	0	1.411e-09	51.54	4.7699e-05	4	3763.98	0.639995	55.3268	1
SLGNVnFTVSAEALESQELcGTEVPSVPEHGRK	2	P01023	N6(Deamidated); C20(Carbamidomethyl)	0	1.574e-10	100.36	1.36227e-09	4	3542.71	1.99809	35.147	1
VSnQTLSLFFTVLQDVPVR	1	P01023	N3(Deamidated)	0	1.801e-08	67.84	1.72659e-06	3	2164.17	1.58574	54.6419	0
TEVSSNHVLIYLDKVSnQTLSLFFTVLQDVPVR	1	P01023	N17(Deamidated)	0	1.428e-16	105.08	2.03349e-10	3	3763	2.21897	54.6793	1
IITILEEEMnVSVcGLYTYGKPVPGHVTVSIcR	1	P01023	N10(Deamidated); C14(Carbamidomethyl); C32(Carbamidomethyl)	0	9.226e-08	28.26	0.0189585	4	3735.89	2.66115	41.5398	0
ALGFEnATQALGR	4	Q08380	N6(Deamidated)	0	2.382e-07	91.54	1.29068e-08	2	1348.69	0.609234	31.8637	0
EPGSnVTMSVDAEcVPMVR	2	Q08380	N5(Deamidated); C14(Carbamidomethyl)	0	7.983e-11	116.76	1.29681e-11	2	2078.92	1.1627	34.7142	0
YKGLnLTEDTYKPR	3	Q08380	N5(Deamidated)	0	2.715e-08	105.57	4.24318e-10	2	1698.87	2.45555	21.197	1
GLnLTEDTYKPR	2	Q08380	N3(Deamidated)	0	7.652e-07	74.42	5.3308e-07	2	1407.71	0.163542	22.4635	0
IRFPMMLPEELFELQFnLSLYWSHEALFQK	1	Q08380	N17(Deamidated)	0	1.277e-08	30.86	0.0109927	4	3757.89	2.76809	54.5425	1
IRFPMMLPEELFELQFnLSLYWSHEALFQKK	1	Q08380	N17(Deamidated)	0	2.336e-13	43.07	0.000586877	4	3885.97	-0.0873113	53.2938	2
FPMMLPEELFELQFnLSLYWSHEALFQKK	1	Q08380	N15(Deamidated)	0	1.388e-10	29.74	0.0161909	4	3616.79	-0.394988	54.2313	1
AAIPSALDTnSSKSTSSFPcPAGHFnGFR	4	Q08380	N10(Deamidated); C20(Carbamidomethyl); N26(Deamidated)	0	3.817e-11	48.99	0.00014511	3	3026.4	3.08079	30.9984	1
AAIPSALDTnSSKSTSSFPcPAGHFNGFR	2	Q08380	N10(Deamidated); C20(Carbamidomethyl)	0	6.805e-13	100.58	1.17685e-09	3	3025.41	0.663288	29.7879	1
AAIPSALDTnSSK	1	Q08380	N10(Deamidated)	0	2.118e-05	80.07	1.6679e-07	2	1275.64	0.38316	23.0845	0
TVIRPFYLTnSSGVD	4	Q08380	N10(Deamidated)	0	3.892e-06	80.99	1.36939e-07	2	1669.85	1.50518	36.1851	0
ALmLcEGLFVADVTDFEGWKAAIPSALDTnSSK	1	Q08380	M3(Oxidation); C5(Carbamidomethyl); N30(Deamidated)	0	3.758e-12	61.83	1.00062e-05	3	3573.72	2.1602	51.6676	1
HERDAGVVcTnETR	2	Q08380	C9(Carbamidomethyl); N11(Deamidated)	0	5.571e-11	72.13	4.28645e-07	3	1644.74	1.22753	9.10657	1
DAGVVcTnETR	2	Q08380	C6(Carbamidomethyl); N8(Deamidated)	0	7.814e-05	58.42	8.63279e-06	2	1222.54	0.508684	17.0656	0
DAGVVcTnETRSTHTLDLSR	2	Q08380	C6(Carbamidomethyl); N8(Deamidated)	0	8.814e-06	32.79	0.00683822	3	2233.05	0.867681	22.2868	1
ALMLcEGLFVADVTDFEGWKAAIPSALDTnSSK	2	Q08380	C5(Carbamidomethyl); N30(Deamidated)	0	1.128e-13	86.23	3.64495e-08	3	3557.72	-0.323027	53.0097	1
SLVTQYLnATGnRWcSWSLSQAR	1	P08195	N8(Deamidated); N12(Deamidated); C15(Carbamidomethyl)	0	9.974e-08	50.22	0.000132609	3	2700.29	0.827118	39.73	1
SLVTQYLnATGNRWcSWSLSQAR	4	P08195	N8(Deamidated); C15(Carbamidomethyl)	0	1.513e-06	64.18	6.07291e-06	2	2699.3	1.92042	38.6314	1
SLVTQYLnATGNR	2	P08195	N8(Deamidated)	0	7.86e-06	64.81	4.87295e-06	3	1437.73	1.10564	30.9922	0
LLIAGTnSSDLQQILSLLESNK	1	P08195	N7(Deamidated)	0	6.603e-09	72.89	4.7549e-07	3	2358.28	0.514659	54.3375	0
DIENLKDASSFLAEWQnITK	3	P08195	N17(Deamidated)	0	2.152e-11	92.12	1.09863e-08	2	2323.15	0.93461	46.5114	1
DIENLKDASSFLAEWQnITKGFSEDR	2	P08195	N17(Deamidated)	0	1.245e-18	113.29	8.27456e-11	3	3014.44	1.12493	48.2618	2
DASSFLAEWQnITK	1	P08195	N11(Deamidated)	0	5.486e-07	92.27	7.73768e-09	2	1610.77	-0.104578	46.8076	0
DASSFLAEWQnITKGFSEDR	2	P08195	N11(Deamidated)	0	6.34e-09	83.64	5.4713e-08	2	2302.06	0.621617	48.7631	1
KQELSRDnATLQATLHAAR	2	O15230	N8(Deamidated)	0	1.128e-14	69.69	1.55728e-06	3	2124.12	2.41296	18.8814	2
AQQLLAnSTALEEAMLQEQQR	1	O15230	N7(Deamidated)	0	2.953e-13	123.83	6.78959e-12	3	2373.17	0.371304	39.9783	0
IVPLEnGEIVVSLVNGRPGAMnFSYSPLLR	4	O15230	N6(Deamidated); N22(Deamidated)	0	2.204e-06	36.68	0.00167531	3	3243.72	3.90575	50.713	0
LHRLnASIADLQSQLR	3	O15230	N5(Deamidated)	0	8.219e-10	62.01	4.7213e-06	2	1836.01	2.20348	27.7107	1
GVHnASLALSASIGR	2	O15230	N4(Deamidated)	0	5.358e-10	100.4	1.3133e-09	2	1453.78	0.733103	24.7856	0
RLnTTGVSAGcTADLLVGR	1	O15230	N3(Deamidated); C11(Carbamidomethyl)	0	3.151e-08	89.41	2.10774e-08	3	1962.01	2.18682	29.2205	1
IVPLENGEIVVSLVNGRPGAMnFSYSPLLR	2	O15230	N22(Deamidated)	0	2.597e-08	15.58	0.190919	3	3242.73	1.08584	47.6358	0
AVDRTLSELMSQTGHLGLAnASAPSGEQLLR	2	O15230	N20(Deamidated)	0	2.278e-13	79.79	1.64253e-07	3	3223.64	1.91296	38.5696	1
LnTTGVSAGcTADLLVGR	1	O15230	N2(Deamidated); C10(Carbamidomethyl)	0	1.281e-09	152.9	1.01803e-14	2	1805.91	2.30725	34.4618	0
DnATLQATLHAAR	1	O15230	N2(Deamidated)	0	2.912e-06	60.24	1.55183e-05	3	1382.7	0.138123	22.4327	0
LnASIADLQSQLR	1	O15230	N2(Deamidated)	0	2.842e-07	70.19	1.58894e-06	2	1429.77	0.581325	34.5201	0
LnLTSPDLFWLVFR	1	O15230	N2(Deamidated)	0	3.31e-09	94.78	3.89212e-09	2	1721.93	0.991182	55.183	0
DnATLQATLHAARDTLASVFR	1	O15230	N2(Deamidated)	0	3.842e-05	25.69	0.0438383	3	2272.17	0.182609	43.3398	1
LVEAAEAHAQQLGQLALnLSSIILDVNQDRLTQR	2	O15230	N18(Deamidated)	0	1.454e-13	72.99	2.58706e-07	3	3728.99	0.357376	52.1151	1
TQAGFADGAPHYVAFYSnATGVWLYVDDQLQQMKPHR	1	O15230	N18(Deamidated)	0	6.497e-11	41.42	0.000868935	4	4182.98	1.83851	43.7976	0
TLSELMSQTGHLGLAnASAPSGEQLLR	2	O15230	N16(Deamidated)	0	5.906e-10	64.26	6.41204e-06	3	2782.41	2.33623	37.9042	0
LLLGGLPESGTIYnFSGcISNVFVQR	1	O15230	N14(Deamidated); C18(Carbamidomethyl)	0	2.424e-08	77.29	3.35015e-07	2	2842.44	0.0409425	52.3974	0
QGLVDRAQQLLAnSTALEEAMLQEQQR	2	O15230	N13(Deamidated)	0	5.162e-09	64.71	5.88233e-06	3	3041.54	1.91045	47.9596	1
VFDLQQNLGSVnVSTGcAPALQAQTPGLGPR	3	O15230	N12(Deamidated); C17(Carbamidomethyl)	0	5.044e-10	95.64	4.29814e-09	3	3196.62	4.73357	42.2927	0
LVGGPVAGGDPnQTIR	1	O15230	N12(Deamidated)	0	4.427e-09	77.68	2.47382e-07	2	1551.81	0.964815	25.1712	0
FGFNPLEFEnFSWR	1	O15230	N10(Deamidated)	0	1.944e-06	33.68	0.00396407	2	1790.82	0.37048	50.1239	0
cEIcAPGFYGNALLPGncTR	1	O15230	C1(Carbamidomethyl); C4(Carbamidomethyl); N17(Deamidated); C18(Carbamidomethyl)	0	0.0009492	18.26	0.124648	2	2271.01	2.8373	50.7009	0
DIKEAGnITTDGYEILGK	2	Q99715	N7(Deamidated)	0	9.685e-12	82.91	8.49392e-08	2	1937.97	1.23147	33.2035	1
MLEAYnLTEKNFASVQGVSLESGSFPSYSAYR	1	Q99715	N6(Deamidated)	0	2.749e-12	126.93	2.81848e-12	3	3546.68	1.02345	41.1832	1
EAGnITTDGYEILGK	1	Q99715	N4(Deamidated)	0	9.674e-07	82.03	9.11723e-08	2	1581.76	0.387464	33.4802	0
IASAVQKnATSTK	2	P11047	N8(Deamidated)	0	7.362e-08	61.43	9.46075e-06	2	1319.72	1.40491	8.98682	1
QVLSYGQnLSFSFR	1	P11047	N8(Deamidated)	0	1.383e-07	68.13	2.67639e-06	2	1646.82	1.23647	37.3524	0
IASAVQKnATSTKAEAER	4	P11047	N8(Deamidated)	0	7.356e-11	69.65	1.89145e-06	3	1875.98	0.622788	10.4929	2
KYEQAKnISQDLEK	2	P11047	N7(Deamidated)	0	7.573e-09	99.83	1.72107e-09	2	1694.86	1.97381	16.3964	2
KIPAInQTITEANEK	2	P11047	N6(Deamidated)	0	5.482e-11	96.92	3.0587e-09	2	1670.9	-0.0572614	22.9395	1
KIPAInQTITEANEKTR	3	P11047	N6(Deamidated)	0	6.032e-10	79.66	1.29772e-07	3	1928.04	-0.0546737	21.0707	2
TLAGEnQTAFEIEELNR	2	P11047	N6(Deamidated)	0	1.906e-10	118.84	2.18784e-11	2	1935.93	2.38248	34.5645	0
TLAGEnQTAFEIEELNRK	1	P11047	N6(Deamidated)	0	7.344e-09	57.14	3.6321e-05	3	2064.03	1.60746	28.8794	1
RVNDnKTAAEEALR	2	P11047	N5(Deamidated)	0	5.023e-08	70.97	1.49569e-06	2	1587.81	1.25152	13.9668	2
LLNnLTSIK	1	P11047	N4(Deamidated)	0	0.006647	52.68	4.58584e-05	2	1016.6	0.483369	28.574	0
VNDnKTAAEEALR	2	P11047	N4(Deamidated)	0	2.723e-06	92.31	8.69484e-09	3	1431.71	0.195575	15.9158	1
LLnnLTSIK	1	P11047	N3(Deamidated); N4(Deamidated)	0	0.006717	48.99	0.000117981	2	1017.58	0.355854	30.737	0
TAnDTSTEAYNLLLR	2	P11047	N3(Deamidated)	0	9.122e-09	114.94	4.8575e-11	2	1682.83	1.63299	36.1842	0
VnNTLSSQISR	2	P11047	N2(Deamidated)	0	0.0003128	69.72	1.81855e-06	2	1219.63	-0.31187	19.9206	0
nISQDLEK	1	P11047	N1(Deamidated)	0.001	0.01391	25.28	0.039877	2	947.468	0.0083136	21.1604	0
nATSTKAEAER	1	P11047	N1(Deamidated)	0	0.0005472	25.28	0.038691	3	1178.56	-0.702808	4.89064	1
nATSTKAEAERTFAEVTDLDNEVNNMLK	1	P11047	N1(Deamidated)	0	1.745e-10	56.54	3.41602e-05	3	3112.48	2.55792	40.5702	2
DKVFQGNFDnDTHR	1	O43854	N10(Deamidated)	0	1.829e-05	14.19	0.249598	3	1693.76	1.91437	18.7112	1
DKVFQGNFDnDTHRK	1	O43854	N10(Deamidated)	0	0.0047	11.91	0.818095	4	1821.85	-0.237327	15.0553	2
nGGIcTDLVAnYScEcPGEFMGR	1	O43854	N1(Deamidated); C5(Carbamidomethyl); N11(Deamidated); C14(Carbamidomethyl); C16(Carbamidomethyl)	0	4.962e-10	59.6	1.09648e-06	2	2609.04	-1.66056	45.2372	0
NGGIcTDLVAnYScEcPGEFMGR	1	O43854	C5(Carbamidomethyl); N11(Deamidated); C14(Carbamidomethyl); C16(Carbamidomethyl)	0	7.71e-09	48.99	1.89274e-05	2	2608.06	1.66474	38.3753	0
IISAnGcKVDNSSLTGESEPQTR	3	P05023	N5(Deamidated); C7(Carbamidomethyl)	0	1.103e-11	89.33	1.67437e-08	2	2464.17	1.79379	22.4962	1
RVNncSDMcFHQK	2	Q92626	N4(Deamidated); C5(Carbamidomethyl); C9(Carbamidomethyl)	0	3.433e-08	53.85	8.8601e-06	3	1696.7	-0.166647	10.515	1
VNncSDMcFHQK	1	Q92626	N3(Deamidated); C4(Carbamidomethyl); C8(Carbamidomethyl)	0	3.499e-06	48.64	1.36449e-05	3	1540.6	1.15357	14.7299	0
nGDPFVATSIVEAIATVDRAInSTR	1	Q92626	N1(Deamidated); N22(Deamidated)	0	1.549e-07	53.34	8.7128e-05	3	2619.32	-1.22632	55.5713	1
ILcDNADnITRVQSDVFR	2	Q92626	C3(Carbamidomethyl); N8(Deamidated)	0	8.544e-06	43.07	0.000853191	3	2137.04	0.340206	31.5789	1
VYcnLSAAHTFEDLK	1	Q92626	C3(Carbamidomethyl); N4(Deamidated)	0	2.738e-07	61.3	9.00692e-06	3	1768.82	0.424707	28.1828	0
VYcnLSAAHTFEDLKNEIKNPEIR	2	Q92626	C3(Carbamidomethyl); N4(Deamidated)	0	4.52e-16	75.1	5.34621e-07	3	2862.42	2.37822	31.0831	2
SGKPLLPFATGPPTEcMRDEnESPIPcFLAGDHR	1	Q92626	C16(Carbamidomethyl); N21(Deamidated); C27(Carbamidomethyl)	0	2.747e-10	31.54	0.00953979	4	3797.8	6.14241	35.5489	1
HYHSMEVFTHYDLLNLnGTK	3	Q9Y4K0	N17(Deamidated)	0	2.118e-09	75.46	4.11025e-07	2	2420.14	1.03503	30.778	0
HYHSMEVFTHYDLLNLnGTKVAEGHK	1	Q9Y4K0	N17(Deamidated)	0	4.326e-11	48.99	0.000206309	4	3041.46	1.17476	27.2468	1
LGPQVSLDPMKnVTcEnGLPAVVScVPGQVFSPDGPSR	1	Q9Y4K0	N12(Deamidated); C15(Carbamidomethyl); N17(Deamidated); C25(Carbamidomethyl)	0	9.152e-14	92.04	9.12752e-09	3	4010.94	2.41515	46.1813	1
HYHSmEVFTHYDLLNLnGTK	1	Q9Y4K0	M5(Oxidation); N17(Deamidated)	0	3.557e-09	54.26	4.48093e-05	4	2436.13	0.348564	27.6819	0
SESVPPVTDWAWYKITDSEDKALMnGSESR	1	P35613	N25(Deamidated)	0	2.821e-07	45.05	0.000364188	4	3399.57	-0.057404	38.7904	2
ITDSEDKALMnGSESR	4	P35613	N11(Deamidated)	0	1.368e-09	103.54	4.22672e-10	2	1753.79	1.16265	17.8054	1
ALmnGSESR	2	P35613	M3(Oxidation); N4(Deamidated)	0	0.0009502	45.17	0.000147483	2	981.431	0.319433	8.36113	0
SESVPPVTDWAWYKITDSEDKALmnGSESR	1	P35613	M24(Oxidation); N25(Deamidated)	0	4.339e-05	12.63	0.51847	4	3415.57	0.716849	37.2835	2
ITDSEDKALmnGSESR	5	P35613	M10(Oxidation); N11(Deamidated)	0	2.998e-09	102.89	4.7292e-10	2	1769.79	1.19741	16.6984	1
ILLTcSLnDSATEVTGHR	7	P35613	C5(Carbamidomethyl); N8(Deamidated)	0	2.388e-12	123.14	8.3227e-12	3	1987.98	1.33311	28.7397	0
SELHIENLNMEADPGQYRcnGTSSK	2	P35613	C19(Carbamidomethyl); N20(Deamidated)	0	1.258e-07	70.09	5.97489e-07	4	2851.27	1.74355	26.1943	1
cnGTSSKGSDQAIITLR	1	P35613	C1(Carbamidomethyl); N2(Deamidated)	0	6.058e-06	18.99	0.189274	2	1808.88	1.2167	21.4993	1
AGVnFSEFTGVWK	1	O75340	N4(Deamidated)	0	1.125e-05	62.49	6.5382e-06	2	1442.7	0.922877	43.25	0
SGVISDTELQQALSnGTWTPFNPVTVR	2	O75340	N15(Deamidated)	0	4.289e-11	98.72	2.36327e-09	3	2918.46	2.1513	48.5547	0
VPTAnVSVVDLTcRLEKPAKYDDIK	1	P04406	N5(Deamidated); C13(Carbamidomethyl)	0	5.05e-05	10.95	0.815579	4	2832.5	6.30712	29.0438	2
VSDTVVEPYnATLSVHQLVENTDETYcIDNEALYDIcFR	2	P68371;P07437;Q9BUF5	N10(Deamidated); C27(Carbamidomethyl); C37(Carbamidomethyl)	0	1.422e-05	23.29	0.0421932	4	4594.11	4.05318	47.4649	0
VSDTVVEPYnATLSVHQLVENTDETYcIDNEALYDIcFR	2	P68371;P07437;Q9BUF5	N10(Deamidated); C27(Carbamidomethyl); C37(Carbamidomethyl)	0	1.422e-05	23.29	0.0421932	4	4594.11	4.05318	47.4649	0
VTMGQNGnLYFANVLTSDnHSDYIcHAHFPGTR	2	P32004	N8(Deamidated); N19(Deamidated); C25(Carbamidomethyl)	0	1.238e-13	57.79	9.73096e-06	4	3738.67	0.505654	35.974	0
HQMAVKTnGTGR	1	P32004	N8(Deamidated)	0	6.481e-05	58.83	1.70194e-05	2	1300.64	0.594257	8.69351	1
LLFPTnSSSHLVALQGQPLVLEcIAEGFPTPTIK	1	P32004	N6(Deamidated); C23(Carbamidomethyl)	0	1.87e-07	43.55	0.000388582	4	3678.93	-3.14623	51.1592	0
ILTADnQTYMAVQGSTAYLLcK	2	P32004	N6(Deamidated); C21(Carbamidomethyl)	0	4.303e-10	65.75	4.36359e-06	2	2462.19	-1.93347	40.3728	0
FFPYAnGTLGIR	1	P32004	N6(Deamidated)	0	1.108e-05	54.41	4.78161e-05	2	1356.69	-1.41571	37.142	0
VQAVnSQGKGPEPQVTIGYSGEDYPQAIPELEGIEILnSSAVLVK	1	P32004	N5(Deamidated); N38(Deamidated)	0	9.668e-10	64.68	2.85943e-06	3	4726.43	6.30469	47.6427	1
DLQAnDTGR	1	P32004	N5(Deamidated)	0.002	0.06814	29.09	0.00709035	2	990.451	2.57782	12.4182	0
VPGnQTSTTLK	1	P32004	N4(Deamidated)	0	1.922e-06	68.11	2.95144e-06	2	1146.6	-0.099525	15.6041	0
AFGAPVPSVQWLDEDGTTVLQDERFFPYAnGTLGIR	2	P32004	N30(Deamidated)	0	1.798e-10	50.13	0.00014218	4	3967.95	0.194864	51.1521	1
GYnVTYWR	1	P32004	N3(Deamidated)	0.003	0.07012	29.36	0.0070106	2	1059.49	-1.27665	26.8768	0
THnLTDLSPHLR	3	P32004	N3(Deamidated)	0	5.254e-07	71.64	1.23731e-06	3	1404.72	0.462854	21.5193	0
VQWRPQGTRGPWQEQIVSDPFLVVSnTSTFVPYEIK	1	P32004	N26(Deamidated)	0	5.053e-11	34.26	0.003431	4	4190.14	2.25731	43.5291	1
VTMGQNGNLYFANVLTSDnHSDYIcHAHFPGTR	1	P32004	N19(Deamidated); C25(Carbamidomethyl)	0	2.906e-09	36.12	0.00179592	4	3737.69	1.65079	34.088	0
GPWQEQIVSDPFLVVSnTSTFVPYEIK	2	P32004	N17(Deamidated)	0	0.0003117	39.9	0.00161169	2	3081.55	0.882719	53.3778	0
EGGTMALSGISDFGnISATAGEnYSVVSWVPKEGQcnFR	1	P32004	N15(Deamidated); N23(Deamidated); C36(Carbamidomethyl); N37(Deamidated)	0	8.364e-06	17.43	0.149995	4	4138.88	3.23981	46.1327	1
EGGTMALSGISDFGnISATAGEnYSVVSWVPKEGQcNFR	2	P32004	N15(Deamidated); N23(Deamidated); C36(Carbamidomethyl)	0	1.238e-08	43.98	0.000375948	3	4137.9	4.35184	46.0496	1
EGGTMALSGISDFGnISATAGEnYSVVSWVPK	1	P32004	N15(Deamidated); N23(Deamidated)	0	5.199e-11	50.69	0.000106638	3	3246.51	-0.340746	52.1436	0
LVIHSLDYSDQGnYScVASTELDVVESR	1	P32004	N13(Deamidated); C16(Carbamidomethyl)	0	1.117e-10	98.98	1.61886e-09	3	3157.47	1.81281	37.7432	0
GGASLSPQYVSYnQSSYTQWDLQPDTDYEIHLFKER	1	P32004	N13(Deamidated)	0	1.145e-09	35.81	0.00282103	4	4223.96	2.52725	39.4758	1
WYSLGKVPGnQTSTTLK	1	P32004	N10(Deamidated)	0	0.0001048	10.73	1.36513	3	1880.98	0.745051	26.4012	1
GSGPASEFTFSTPEGVPGHPEALHLEcQSnTSLLLR	2	P32004	C27(Carbamidomethyl); N30(Deamidated)	0	8.201e-09	63.2	6.5333e-06	3	3823.83	2.29224	37.4112	0
KKEDALnETR	1	P10909	N7(Deamidated)	0	3.563e-05	63.52	7.9589e-06	2	1204.62	0.710665	7.21494	2
KEDALnETRESETK	1	P10909	N6(Deamidated)	0	2.406e-09	62.92	7.93835e-06	2	1650.79	2.44544	9.14687	2
EIRHnSTGcLR	2	P10909	N5(Deamidated); C9(Carbamidomethyl)	0	0.0009115	20.78	0.0869027	3	1343.65	2.37801	8.85741	1
LAnLTQGEDQYYLR	2	P10909	N3(Deamidated)	0	9.397e-09	115.08	4.03593e-11	2	1684.82	2.64352	31.1098	0
MLnTSSLLEQLNEQFNWVSR	3	P10909	N3(Deamidated)	0	3.773e-10	100.86	1.50945e-09	3	2410.17	0.419396	53.9591	0
HnSTGcLR	1	P10909	N2(Deamidated); C6(Carbamidomethyl)	0.005	0.1446	15.36	0.117884	2	945.421	0.23771	5.22262	0
mLnTSSLLEQLNEQFNWVSR	2	P10909	M1(Oxidation); N3(Deamidated)	0	9.22e-10	118.16	2.45938e-11	2	2426.17	0.329411	53.0354	0
LKELPGVcnETMmALWEEcKPcLK	4	P10909	C8(Carbamidomethyl); N9(Deamidated); M13(Oxidation); C19(Carbamidomethyl); C22(Carbamidomethyl)	0	1.345e-08	34.86	0.00422931	3	2953.36	0.227121	33.721	1
LKELPGVcnETMMALWEEcKPcLK	2	P10909	C8(Carbamidomethyl); N9(Deamidated); C19(Carbamidomethyl); C22(Carbamidomethyl)	0	1.18e-09	55.12	4.44496e-05	4	2937.37	1.3809	35.8379	1
ELPGVcnETmMALWEEcKPcLK	2	P10909	C6(Carbamidomethyl); N7(Deamidated); M10(Oxidation); C17(Carbamidomethyl); C20(Carbamidomethyl)	0	4.659e-07	15.07	0.175812	3	2712.18	-0.0139241	37.7695	0
ELPGVcnETMMALWEEcKPcLK	1	P10909	C6(Carbamidomethyl); N7(Deamidated); C17(Carbamidomethyl); C20(Carbamidomethyl)	0	2.993e-11	56.26	1.4787e-05	3	2696.19	1.722	40.2939	0
KQNNGAFnETLFR	2	P02786	N8(Deamidated)	0	5.665e-09	97.86	2.25062e-09	2	1539.76	1.39791	23.663	1
KQNnGAFnETLFR	3	P02786	N4(Deamidated); N8(Deamidated)	0	5.02e-08	84.7	4.94712e-08	2	1540.74	0.996199	26.7153	1
LVHANFGTKKDFEDLYTPVnGSIVIVR	2	P02786	N20(Deamidated)	0	7.234e-07	36.96	0.00178215	4	3033.61	1.40363	32.7008	2
KDFEDLYTPVnGSIVIVR	2	P02786	N11(Deamidated)	0	2.159e-08	79.07	1.79626e-07	3	2066.08	1.09411	38.2793	1
DFEDLYTPVnGSIVIVR	2	P02786	N10(Deamidated)	0	3.836e-08	60.82	1.45304e-05	3	1937.99	-0.0307096	48.4328	0
LSDTTSQSnSTAKELDSLQTEAESLDNTVK	1	P07942	N9(Deamidated)	0	2.001e-09	56.48	3.1037e-05	3	3213.52	2.6358	35.5892	1
AIKQADEDIQGTQNLLTSIESETAASEETLFnASQR	2	P07942	N32(Deamidated)	0	2.365e-15	101.82	8.87838e-10	3	3909.89	2.40014	46.1923	1
GTnYTVR	1	P07942	N3(Deamidated)	0.005	0.1525	43.07	0.000362483	2	811.394	-0.100514	10.9962	0
TnATKEKMDK	1	P07942	N2(Deamidated)	0.002	0.06002	23.02	0.0641067	2	1166.57	-0.240266	3.34055	2
QSAEDILLKTnATK	1	P07942	N11(Deamidated)	0	3.555e-08	89.49	1.69253e-08	2	1532.82	-0.158826	24.1421	1
AAVPKnVSVAEGK	2	Q9P2B2	N6(Deamidated)	0	2.175e-08	76.08	2.77429e-07	2	1270.7	0.500482	15.9062	1
QRnNSWVK	1	Q9P2B2	N3(Deamidated)	0.001	0.02058	36.16	0.00462417	2	1032.52	0.931299	9.19293	1
LEnWTDASRVDGVVLEKVQEDEFR	1	Q9P2B2	N3(Deamidated)	0	3.023e-06	16.24	0.382671	4	2835.39	2.35804	36.4093	2
VAEAVSSPAGVGVTWLEPDYQVYLnASKVPGFADDPTELAcR	1	Q9P2B2	N25(Deamidated); C41(Carbamidomethyl)	0	2.056e-13	49.09	0.000155371	4	4480.17	0.24896	49.6932	1
VAEAVSSPAGVGVTWLEPDYQVYLnASK	1	Q9P2B2	N25(Deamidated)	0	6.292e-06	30.52	0.0152591	2	2951.47	0.963975	46.8529	0
EAATSLSNPIEIDFQTSGPIFnASVHSDTPSVIR	1	Q9P2B2	N22(Deamidated)	0	1.41e-12	75.76	4.20755e-07	3	3601.76	-0.704799	44.0807	0
EAATSLSNPIEIDFQTSGPIFnASVHSDTPSVIRGDLIK	2	Q9P2B2	N22(Deamidated)	0	1.771e-10	51.65	8.27533e-05	4	4128.08	0.696111	43.3711	1
YSVLIMAEKPVGDLSSPnETK	2	Q9P2B2	N18(Deamidated)	0	1.232e-13	109.06	2.26602e-10	2	2279.15	2.0815	32.4959	0
nVSVAEGK	1	Q9P2B2	N1(Deamidated)	0	0.004175	47.88	0.000277795	2	804.41	0.0252829	11.0007	0
ELDLTcnITTDRADDVRPEVTWSFSR	1	Q9P2B2	C6(Carbamidomethyl); N7(Deamidated)	0	4.066e-06	16.74	0.288097	3	3097.46	0.656695	37.2333	1
YLQTLTTIAAEKnSTIVFPLPIDMLQGIIGAK	1	P27105	N13(Deamidated)	0	3.528e-07	37.35	0.000598251	3	3460.91	1.80548	54.5027	1
IFFVNPAPPYLWPAHKNELMLnSSLMR	2	O00468	N22(Deamidated)	0	1.746e-07	41.97	0.000975233	3	3186.63	1.04965	42.8779	1
LIDNnKTEK	1	P07602	N5(Deamidated)	0	0.001232	16.04	0.450483	2	1075.56	0.34846	8.31828	1
NLEKnSTKQEILAALEK	3	P07602	N5(Deamidated)	0	1.964e-10	88.61	1.29458e-08	3	1930.05	1.48174	25.3209	2
LIDNnKTEKEILDAFDK	1	P07602	N5(Deamidated)	0	7.07e-07	33.56	0.00775377	3	2007.03	0.635665	30.8096	2
TnSTFVQALVEHVKEEcDRLGPGMADIcK	2	P07602	N2(Deamidated); C17(Carbamidomethyl); C28(Carbamidomethyl)	0	4.716e-10	42.97	0.000716619	3	3305.57	3.34732	39.2875	2
TnSTFVQALVEHVKEEcDR	2	P07602	N2(Deamidated); C17(Carbamidomethyl)	0	1.712e-07	65.7	3.71432e-06	3	2263.06	-0.57439	33.7462	1
DVVTAAGDMLKDnATEEEILVYLEK	1	P07602	N13(Deamidated)	0	4.774e-12	98.16	2.55104e-09	3	2767.36	-0.660244	49.6547	1
SLPcDIcKDVVTAAGDMLKDnATEEEILVYLEK	2	P07602	C4(Carbamidomethyl); C7(Carbamidomethyl); N21(Deamidated)	0	6.456e-10	49.7	0.00015162	4	3740.8	1.46302	50.2804	2
TcDWLPKPnMSAScK	2	P07602	C2(Carbamidomethyl); N9(Deamidated); C14(Carbamidomethyl)	0	6.79e-05	35.02	0.00179422	2	1795.78	1.64384	26.4469	0
cGLSQSQGnLSHVDWFSVHK	2	P43121	C1(Carbamidomethyl); N9(Deamidated)	0	1.008e-08	65.51	3.59923e-06	3	2287.06	0.962558	28.5851	0
RPSTAnVTR	1	P0CW18	N6(Deamidated)	0	0.0006221	49.71	0.000131494	2	1002.53	0.156816	8.77805	0
SNWHKGWnWTSGFNK	2	P15328	N8(Deamidated)	0	4.427e-09	66.56	2.51713e-06	3	1849.84	0.490591	24.7506	1
GWnWTSGFNK	1	P15328	N3(Deamidated)	0	0.0005567	43.24	0.000263204	2	1197.53	0.508782	33.1888	0
nAccSTnTSQEAHKDVSYLYR	1	P15328	N1(Deamidated); C3(Carbamidomethyl); C4(Carbamidomethyl); N7(Deamidated)	0	0.0006449	10.33	0.268781	3	2506.06	1.41936	22.2065	1
KNAccSTnTSQEAHK	1	P15328	C4(Carbamidomethyl); C5(Carbamidomethyl); N8(Deamidated)	0	1.461e-06	70.36	3.58975e-07	2	1736.74	1.8265	3.69786	1
KNAccSTnTSQEAHKDVSYLYR	2	P15328	C4(Carbamidomethyl); C5(Carbamidomethyl); N8(Deamidated)	0	8.872e-15	91.08	6.04368e-09	3	2633.18	1.1916	16.6881	2
NAccSTnTSQEAHKDVSYLYR	3	P15328	C3(Carbamidomethyl); C4(Carbamidomethyl); N7(Deamidated)	0	2.17e-09	84.12	1.78139e-08	2	2505.08	2.13474	19.3216	1
HQVSInNTAVMQR	3	P25391	N6(Deamidated)	0	2.138e-06	76.05	2.91768e-07	3	1498.74	1.03171	18.8793	0
KIGnITHSIPAcIGDVTVNSK	2	P25391	N4(Deamidated); C12(Carbamidomethyl)	0	9.028e-13	84.87	4.67576e-08	3	2225.16	1.38889	29.0939	1
YNnGTWYK	1	P25391	N3(Deamidated)	0	0.004228	46.59	6.57841e-05	2	1046.46	0.479954	19.6499	0
QTnESLLILR	1	P25391	N3(Deamidated)	0	0.0001512	82.98	8.08118e-08	2	1187.66	-0.260996	31.8304	0
TInVSNLYVGGIPEGEGTSLLTMR	1	P25391	N3(Deamidated)	0	7.739e-06	79.61	1.71204e-07	2	2522.29	3.68291	46.0075	0
ELATSASQSAVSTLRDVAGLSQELLnTSASLSR	1	P25391	N26(Deamidated)	0	1.778e-08	64.85	4.4682e-06	3	3363.72	-0.319227	50.0631	1
GLFPAILNLASNAHISTnATcGEKGPEMFcK	1	P25391	N18(Deamidated); C21(Carbamidomethyl); C30(Carbamidomethyl)	0	2.151e-08	15.12	0.501404	3	3349.61	2.25658	39.8193	1
SLSPESEWLVTFATTnSSGIILAALGGDVEKR	1	P25391	N16(Deamidated)	0	1.054e-09	41.61	0.000890409	3	3349.73	3.18432	53.9661	1
QIDRDQLMTVLAnVTHLLIR	2	P25391	N13(Deamidated)	0	2.96e-12	66.89	1.37112e-06	3	2350.29	1.32255	51.5646	1
SPGTANVLDVNnSTLMFVGGLGGQIK	1	P25391	N12(Deamidated)	0	0.0002713	30.2	0.0137996	2	2590.33	3.5412	47.0557	0
DVAGLSQELLnTSASLSR	2	P25391	N11(Deamidated)	0	3.585e-10	98.34	2.64531e-09	2	1861.95	1.96445	44.905	0
SPGTANVLDVnNSTLMFVGGLGGQIKK	2	P25391	N11(Deamidated)	0	8.861e-11	95.75	3.3126e-09	3	2718.42	2.89815	40.7143	1
LLSASAHQnVTYHcYQSVAWQDAATGSYDK	1	P20908	N9(Deamidated); C14(Carbamidomethyl)	0	2.142e-06	20.44	0.0957868	4	3372.53	2.94502	27.6333	0
nVTLILDcK	1	P20908	N1(Deamidated); C8(Carbamidomethyl)	0.001	0.01448	40.31	0.00160151	2	1076.56	-0.973937	33.5236	0
nVTLILDcKK	2	P20908	N1(Deamidated); C8(Carbamidomethyl)	0	0.006763	47.26	0.000282837	2	1204.66	1.25817	25.5314	1
DSFKVYcnFTAGGSTcVFPDKK	1	P20908	C7(Carbamidomethyl); N8(Deamidated); C16(Carbamidomethyl)	0	9.259e-13	64.26	2.56857e-06	3	2529.13	-3.09851	30.5681	2
VYcnFTAGGSTcVFPDKK	2	P20908	C3(Carbamidomethyl); N4(Deamidated); C12(Carbamidomethyl)	0	8.064e-11	100.76	5.62438e-10	2	2051.92	-0.233911	26.5213	1
NGVnGTGEnGR	1	P05556	N4(Deamidated); N9(Deamidated)	0	3.926e-05	28.25	0.00478795	2	1076.46	0.691032	8.26155	0
nGVnGTGEnGRK	1	P05556	N1(Deamidated); N4(Deamidated); N9(Deamidated)	0	0.003098	24.86	0.017799	2	1205.54	-1.41351	6.7839	1
LRNPcTSEQncTSPFSYK	2	P05556	C5(Carbamidomethyl); N10(Deamidated); C11(Carbamidomethyl)	0	1.053e-10	113.4	3.01678e-11	3	2189.96	0.773186	21.6109	1
KDTcTQEcSYFnITKVESR	1	P05556	C4(Carbamidomethyl); C8(Carbamidomethyl); N12(Deamidated)	0	7.519e-14	85.58	2.08904e-08	3	2367.06	0.731683	24.5929	2
NPcTSEQncTSPFSYK	1	P05556	C3(Carbamidomethyl); N8(Deamidated); C9(Carbamidomethyl)	0	1.38e-06	35.32	0.000367206	2	1920.78	2.25978	23.257	0
DTcTQEcSYFnITKVESR	2	P05556	C3(Carbamidomethyl); C7(Carbamidomethyl); N11(Deamidated)	0	5.424e-13	139.74	5.04305e-14	2	2238.97	1.81513	30.7742	1
HTGPGILSMANAGPNTnGSQFFIcTAK	3	P62937	N17(Deamidated); C24(Carbamidomethyl)	0	2.925e-13	131.59	9.43059e-13	3	2792.31	-0.279058	37.0613	0
HTGPGILSMANAGPNTnGSQFFIcTAKTEWLDGK	2	P62937	N17(Deamidated); C24(Carbamidomethyl)	0	4.043e-10	40.49	0.0011211	4	3621.72	1.57709	39.9417	1
HTGPGILSmANAGPNTnGSQFFIcTAK	1	P62937	M9(Oxidation); N17(Deamidated); C24(Carbamidomethyl)	0	1.891e-12	100.61	1.22523e-09	3	2808.31	1.7723	33.1959	0
GYYnQSEAGSHTLQR	3	P30508	N4(Deamidated)	0	1.876e-07	94.32	3.236e-09	2	1711.77	3.30965	16.7879	0
IGPGEPLELLcnVSGALPPAGR	1	Q969P0	C11(Carbamidomethyl); N12(Deamidated)	0	1.105e-11	68.74	2.10514e-06	3	2218.16	0.972268	47.771	0
GHTLTLnFTR	2	P11279	N7(Deamidated)	0	0.001151	32.16	0.0111593	2	1160.61	0.626984	23.3833	0
SGPKnMTFDLPSDATVVLnR	1	P11279	N5(Deamidated); N19(Deamidated)	0	2.353e-08	75.71	5.20957e-07	3	2164.06	1.21458	36.7151	1
KDnTTVTR	1	P11279	N3(Deamidated)	0	0.008658	46.39	0.000324905	2	935.479	-0.513037	3.72014	1
DnTTVTR	1	P11279	N2(Deamidated)	0.002	0.0475	25.09	0.0416603	2	807.384	-0.595304	7.8507	0
EnTSDPSLVIAFGR	1	P11279	N2(Deamidated)	0	3.636e-05	36.98	0.00338756	2	1506.74	0.188959	38.2172	0
YSVQLMSFVYnLSDTHLFPnASSK	2	P11279	N11(Deamidated); N20(Deamidated)	0	1.247e-10	62.47	8.94658e-06	3	2750.31	1.69414	49.2171	0
nATRYSVQLMSFVYnLSDTHLFPnASSK	2	P11279	N1(Deamidated); N15(Deamidated); N24(Deamidated)	0	2.914e-12	74.67	5.54438e-07	4	3193.52	1.53897	49.3053	1
nMTFDLPSDATVVLnR	1	P11279	N1(Deamidated); N15(Deamidated)	0	1.458e-08	89.13	1.6983e-08	2	1794.86	0.421692	46.5586	0
SScGKEnTSDPSLVIAFGR	2	P11279	C3(Carbamidomethyl); N7(Deamidated)	0	5.138e-11	85.92	3.64598e-08	2	2025.96	2.44379	29.1001	1
AFnSTLPTmAQMEK	2	P16070	N3(Deamidated); M9(Oxidation)	0	1.447e-05	52.24	4.59717e-05	2	1585.72	-0.500914	26.8757	0
AFnSTLPTMAQMEK	1	P16070	N3(Deamidated)	0	1.829e-05	66.78	2.23537e-06	2	1569.73	1.5426	31.9358	0
TEAADLcKAFnSTLPTMAQMEK	1	P16070	C7(Carbamidomethyl); N11(Deamidated)	0	9.269e-12	73.24	5.31151e-07	3	2458.13	0.491187	36.9684	1
LNPTVTYGnDSFSAK	1	P05362	N9(Deamidated)	0	5.264e-08	75.3	3.7923e-07	2	1614.76	-0.272204	26.9913	0
RDHHGAnFScR	1	P05362	N7(Deamidated); C10(Carbamidomethyl)	0	0.01245	38.21	0.00056628	2	1357.58	1.24205	6.43461	1
AnLTVVLLR	1	P05362	N2(Deamidated)	0	0.004334	65.22	2.49504e-06	2	999.622	2.05621	35.6178	0
AnLTVVLLRGEK	2	P05362	N2(Deamidated)	0	8.999e-07	67.63	1.06139e-06	2	1313.78	0.695234	28.9898	1
AnLTVVLLRGEKELK	1	P05362	N2(Deamidated)	0	5.807e-07	37.53	0.000441509	3	1684	0.44924	28.8054	2
TELDLRPQGLELFEnTSAPYQLQTFVLPATPPQLVSPR	2	P05362	N15(Deamidated)	0	2.379e-09	46.08	0.000151661	3	4267.24	3.24086	53.1355	0
LDERDcPGnWTWPENSQQTPMcQAWGNPLPELK	1	P05362	C6(Carbamidomethyl); N9(Deamidated); C22(Carbamidomethyl)	0	2.777e-10	40.6	0.00047903	3	3955.76	2.88919	43.2856	1
LnSSSQTNSLK	1	Q15818	N2(Deamidated)	0	7.968e-05	75.04	4.79393e-07	2	1179.59	0.762868	13.104	0
LnSSSQTNSLKDLLQSK	3	Q15818	N2(Deamidated)	0	2.935e-08	77.64	2.90135e-07	3	1863.97	-0.0122508	27.8922	1
LnSSSQTNSLKDLLQSKIDELER	1	Q15818	N2(Deamidated)	0	1.305e-11	94.77	5.36817e-09	3	2619.35	-0.125726	36.4397	2
VNTLEEGKGGPRnDTEER	2	Q15818	N13(Deamidated)	0	0.0008416	19.35	0.164345	2	2001.95	1.83223	10.0129	2
LGnLTVTQAILK	1	Q687X5	N3(Deamidated)	0	1.335e-05	74.46	2.36344e-07	2	1271.76	0.590308	34.4659	0
LGnLTVTQAILKK	2	Q687X5	N3(Deamidated)	0	7.323e-08	85.5	6.48228e-09	2	1399.85	1.14721	28.0943	1
DLcGPDAGPIGnATGQADcK	2	Q8NBI5	C3(Carbamidomethyl); N12(Deamidated); C19(Carbamidomethyl)	0	4.025e-11	103.27	1.46003e-10	2	2017.86	2.64249	29.146	0
GHIPYPLPPNYSYGLcPGnGTTKEEK	2	Q8NBI5	C16(Carbamidomethyl); N19(Deamidated)	0	8.694e-09	42.28	0.000789735	3	2890.36	-3.13707	29.5264	1
GHIPYPLPPNYSYGLcPGnGTTKEEKETAEHENR	1	Q8NBI5	C16(Carbamidomethyl); N19(Deamidated)	0	2.803e-11	41.31	0.000983675	4	3856.8	2.40049	25.5103	2
GSQWSDIEEFcnRScEVPTR	2	P08174	C11(Carbamidomethyl); N12(Deamidated); C15(Carbamidomethyl)	0	4.654e-05	44.16	0.000138135	3	2458.04	2.05477	29.441	1
GSQWSDIEEFcnRScEVPTRLNSASLK	2	P08174	C11(Carbamidomethyl); N12(Deamidated); C15(Carbamidomethyl)	0	1.74e-05	14.74	0.354203	3	3171.46	3.57688	30.4005	2
GYYnQSEAGSHTLQWMYGcDLGPDGR	2	Q29960	N4(Deamidated); C19(Carbamidomethyl)	0	2.867e-08	89.06	3.60079e-09	2	2963.24	2.42314	34.7878	0
YVWnRTELMQASLDPSVTHLMGLFEPGDMK	1	P05187	N4(Deamidated)	0	1.575e-07	27.48	0.0292984	4	3466.66	4.48549	47.8057	1
FNQcnTTR	1	P05187	C4(Carbamidomethyl); N5(Deamidated)	0.001	0.02283	14.31	0.122325	2	1041.44	1.02492	8.91829	0
FNQcnTTRGNEVISVMNR	2	P05187	C4(Carbamidomethyl); N5(Deamidated)	0	1.96e-06	40.5	0.00101157	3	2140.99	0.0668139	24.0654	1
DSLSInATNIK	1	P00533	N6(Deamidated)	0	0.002816	39.84	0.00212175	2	1176.61	0.983081	28.0545	0
HFKncTSISGDLHILPVAFR	1	P00533	N4(Deamidated); C5(Carbamidomethyl)	0	8.347e-08	29.53	0.0177173	4	2313.19	2.26382	31.2017	1
GNMYYENSYALAVLSNYDAnKTGLKELPMR	1	P00533	N20(Deamidated)	0	5.228e-05	22.14	0.101111	4	3426.64	2.37655	38.3467	2
TVKEITGFLLIQAWPEnRTDLHAFENLEIIR	1	P00533	N17(Deamidated)	0	2.719e-06	22.46	0.0371742	4	3667.96	1.98527	45.149	2
TKQHGQFSLAVVSLnITSLGLR	2	P00533	N15(Deamidated)	0	4.027e-08	83.96	1.88842e-08	3	2370.32	1.82517	38.2472	1
EITGFLLIQAWPEnRTDLHAFENLEIIR	2	P00533	N14(Deamidated)	0	1.065e-08	40.82	0.000919016	3	3339.74	0.268604	49.25	1
ncTSISGDLHILPVAFR	1	P00533	N1(Deamidated); C2(Carbamidomethyl)	0	9.919e-07	62.16	1.00038e-05	3	1900.96	0.391086	40.3037	0
EFVENSEcIQcHPEcLPQAMnITcTGR	1	P00533	C8(Carbamidomethyl); C11(Carbamidomethyl); C15(Carbamidomethyl); N21(Deamidated); C24(Carbamidomethyl)	0	5.726e-06	12.36	0.101634	3	3281.38	-0.481132	32.6901	0
VcnGIGIGEFKDSLSInATNIK	1	P00533	C2(Carbamidomethyl); N3(Deamidated); N17(Deamidated)	0	8.897e-06	12.88	0.96863	3	2352.18	1.76397	37.2968	1
TcPAGVMGEnNTLVWK	2	P00533	C2(Carbamidomethyl); N10(Deamidated)	0	5.186e-08	75.61	3.59974e-07	2	1777.83	3.51045	32.0794	0
QQMENYPKnnHTASILDR	2	P08962	N9(Deamidated); N10(Deamidated)	0	6.446e-06	62.57	7.35956e-06	4	2161	0.796481	21.3333	1
QQMENYPKNnHTASILDR	4	P08962	N10(Deamidated)	0	7.547e-10	82.05	9.07534e-08	2	2160.02	1.15171	18.7659	1
nnHTASILDR	1	P08962	N1(Deamidated); N2(Deamidated)	0	0.002324	34	0.00342372	3	1142.54	-0.168148	20.2254	0
QQmENYPKNnHTASILDR	1	P08962	M3(Oxidation); N10(Deamidated)	0	5.113e-07	49.04	0.000149686	3	2176.01	1.70682	16.9696	1
NRVPDSccInVTVGcGINFNEK	1	P08962	C7(Carbamidomethyl); C8(Carbamidomethyl); N10(Deamidated); C15(Carbamidomethyl)	0	7.106e-09	72	5.39469e-07	2	2554.15	1.55513	30.1476	1
ccGAAnYTDWEKIPSMSK	2	P08962	C1(Carbamidomethyl); C2(Carbamidomethyl); N6(Deamidated)	0	1.385e-11	88.32	4.63778e-09	2	2118.9	1.54445	29.8699	1
TLFAnGSIYPPNEGFcPcLESGIQnVSTcR	2	Q8WTV0	N5(Deamidated); C16(Carbamidomethyl); C18(Carbamidomethyl); N25(Deamidated); C29(Carbamidomethyl)	0	5.756e-10	66.86	1.3188e-06	3	3390.51	1.14865	44.8671	0
HKSnITFNNnDTVSFLEYR	5	Q8WTV0	N4(Deamidated); N10(Deamidated)	0	1.445e-10	105.32	4.1274e-10	3	2301.08	0.343917	29.8718	1
SnITFNNnDTVSFLEYR	3	Q8WTV0	N2(Deamidated); N8(Deamidated)	0	1.383e-07	78.23	1.44302e-07	2	2035.92	-0.139217	40.4483	0
VDFWHSDQcNMInGTSGQMWPPFMTPESSLEFYSPEAcR	1	Q8WTV0	C9(Carbamidomethyl); N13(Deamidated); C38(Carbamidomethyl)	0	2.373e-07	41.27	9.70383e-05	3	4639.95	1.56712	52.4595	0
VIEEFYnQTWVHR	2	P11166	N7(Deamidated)	0	2.919e-08	86.73	3.82184e-08	2	1721.83	0.949155	30.1257	0
TQDEILFSnSTR	1	Q6YHK3	N9(Deamidated)	0	0.0004573	46.41	0.000247987	2	1411.67	1.2632	27.7787	0
MEAVQKInYTVPQSGTFKIEFPILEDSSELQLK	1	Q6YHK3	N8(Deamidated)	0	7.392e-08	38.17	0.00186696	4	3783.95	1.8174	43.0953	2
GISDnYTLALITYALSSVGSPK	2	Q6YHK3	N5(Deamidated)	0	2.24e-10	112.72	7.72445e-11	3	2271.18	0.5749	55.4488	0
TASnLTVSVLEAEGVFEK	1	Q6YHK3	N4(Deamidated)	0	0.0001857	37.17	0.00306987	2	1894.96	-0.377096	42.5983	0
TASnLTVSVLEAEGVFEKGSFK	1	Q6YHK3	N4(Deamidated)	0	2.573e-10	70.72	1.53772e-06	3	2314.19	2.12435	40.1374	1
HLnGTITAK	1	Q6YHK3	N3(Deamidated)	0	0.0001984	54.86	2.2208e-05	2	955.521	0.682981	10.3216	0
GQLVAVGKQnSTMFSLTPENSWTPK	1	Q6YHK3	N10(Deamidated)	0	1.773e-10	42.97	0.000885681	3	2721.36	-0.0623121	35.4168	1
nVSTNVFFK	1	Q6YHK3	N1(Deamidated)	0.001	0.03451	23.65	0.0440149	2	1056.54	1.71513	32.0141	0
DSKLnNTNIR	3	Q9H4F8	N5(Deamidated)	0	0.005936	62.68	9.52236e-06	3	1175.6	-0.312941	13.8654	1
LnNTNIR	1	Q9H4F8	N2(Deamidated)	0.002	0.05517	16.96	0.257757	2	845.447	-0.179793	11.3258	0
HLVIKDSKLnNTNIR	2	Q9H4F8	N10(Deamidated)	0	9.655e-09	71.16	4.78498e-07	3	1765.99	-2.38462	16.8088	2
TAVncSSDFDAcLITK	3	P13987	N4(Deamidated); C5(Carbamidomethyl); C12(Carbamidomethyl)	0	1.908e-09	112.93	3.03052e-11	2	1802.8	2.99118	31.2169	0
YIHQnYTK	2	Q02809	N5(Deamidated)	0	0.004194	48.44	0.000126749	2	1067.52	0.833515	8.99661	0
SQNDKFnVSLTVK	2	P56199	N7(Deamidated)	0	4.485e-09	111.65	1.0498e-10	2	1480.77	0.62604	23.5254	1
SEnASLVLSSSNQKR	1	P56199	N3(Deamidated)	0	6.055e-05	27.73	0.0315385	3	1620.82	0.115114	18.0231	1
GnLSTEK	1	P56199	N2(Deamidated)	0.002	0.05338	26.13	0.0402239	2	749.367	-0.903932	5.74952	0
YnHTGQVIIYR	2	P56199	N2(Deamidated)	0	2.78e-05	58.86	2.01526e-05	2	1364.7	2.04194	20.1969	0
GnLSTEKFVEEIK	1	P56199	N2(Deamidated)	0	1.442e-05	31.88	0.0105403	3	1494.77	-1.12752	27.0031	1
SIASEPTEKHFFnVSDELALVTIVK	1	P56199	N13(Deamidated)	0	3.174e-06	16.19	0.340217	4	2775.44	-0.797505	41.016	1
nTTFNVESTK	1	P56199	N1(Deamidated)	0	0.003301	50.78	6.39236e-05	2	1141.54	-0.570002	21.1208	0
nTTFNVESTKK	2	P56199	N1(Deamidated)	0	0.0007168	43.96	0.000456033	2	1269.63	0.930253	15.4203	1
nTTWQAGHNFYNVDMSYLK	2	P07858	N1(Deamidated)	0	1.329e-10	98.42	1.13665e-09	3	2290.02	0.614459	35.525	0
nTTWQAGHNFYNVDMSYLKR	4	P07858	N1(Deamidated)	0	3.096e-08	78.07	1.77009e-07	4	2446.13	1.14988	31.0232	1
DQGSAYAnRTALFPDLLAQGnASLR	1	Q5ZPR3	N8(Deamidated); N21(Deamidated)	0	2.625e-11	63.24	8.84461e-06	3	2651.31	1.20544	42.3178	1
VVLGAnGTYScLVR	1	Q5ZPR3	N6(Deamidated); C11(Carbamidomethyl)	0	3.525e-06	76.79	3.12023e-07	2	1509.77	1.17671	30.4525	0
VVLGAnGTYScLVRNPVLQQDAHSSVTITPQR	2	Q5ZPR3	N6(Deamidated); C11(Carbamidomethyl)	0	7.094e-09	47.32	0.000227058	4	3481.79	2.60188	32.504	1
TALFPDLLAQGnASLR	2	Q5ZPR3	N12(Deamidated)	0	2.325e-08	86.76	2.92045e-08	3	1687.9	1.1299	43.4382	0
SYSTTYEERnITGTR	2	Q15758	N10(Deamidated)	0	1.364e-06	51.7	8.24821e-05	2	1778.82	0.659313	18.4249	1
SGDASInVTNLQLSDIGTYQcK	1	P78310	N7(Deamidated); C21(Carbamidomethyl)	0	1.913e-10	130.12	1.40562e-12	2	2385.12	-0.146133	38.7479	0
nASSEYSGTYScTVR	1	P78310	N1(Deamidated); C12(Carbamidomethyl)	0	2.482e-05	39.22	0.000293201	2	1682.7	2.56601	21.7117	0
IILnFTSLDLYR	1	P13497	N4(Deamidated)	0	8.225e-07	86.04	2.42664e-08	2	1468.8	-0.196358	46.9282	0
VWPDGVIPFVIGGnFTGSQR	2	P13497	N14(Deamidated)	0	5.457e-07	61.93	1.10929e-05	2	2147.1	1.34647	51.3315	0
ISVTPGEKIILnFTSLDLYR	2	P13497	N12(Deamidated)	0	3.737e-11	75.07	2.28711e-07	3	2280.25	1.2686	45.7985	1
LHVTLYncSFGR	1	O15031	N7(Deamidated); C8(Carbamidomethyl)	0	0.007266	32.32	0.00738534	3	1467.71	0.671083	27.2591	0
LSHDAnETLPLHLYVK	2	O15031	N6(Deamidated)	0	1.119e-09	58.1	2.22255e-05	3	1850.97	2.60961	27.637	0
ALSnISLR	1	O15031	N4(Deamidated)	0.001	0.02212	55.55	4.86178e-05	2	874.499	-0.258735	24.4988	0
SInVTGQGFSLIQR	1	O15031	N3(Deamidated)	0	1.526e-07	81.57	1.14595e-07	2	1520.81	0.971745	35.2369	0
ALLRTEAGAFEYVPDPTFEnFTGGVKK	1	O15031	N20(Deamidated)	0	3.987e-07	11.91	1.08865	3	2958.49	-0.126755	36.3844	2
EAESLQPMTVVGTDYVFHnDTK	1	O15031	N19(Deamidated)	0	3.259e-09	58.85	1.64851e-05	3	2482.15	1.63702	36.166	0
ncSFQPER	1	O15031	N1(Deamidated); C2(Carbamidomethyl)	0.005	0.1569	10.97	0.28794	2	1038.43	2.11065	17.2317	0
FKLEWLGncSGLNDETYGYKEGKPcIIIK	3	P05026	N8(Deamidated); C9(Carbamidomethyl); C25(Carbamidomethyl)	0	9.677e-06	14.37	0.625167	3	3433.69	1.61901	33.9588	2
FKLEWLGncSGLNDETYGYK	2	P05026	N8(Deamidated); C9(Carbamidomethyl)	0	4.424e-08	76.57	2.04872e-07	2	2395.1	3.03327	36.7336	1
YLQPLLAVQFTnLTMDTEIR	1	P05026	N12(Deamidated)	0	2.16e-09	69.04	1.80871e-06	2	2367.23	0.434838	51.5578	0
VLGFKPKPPKnESLETYPVMK	3	P05026	N11(Deamidated)	0	1.137e-11	50.9	7.55932e-05	3	2403.3	0.53468	24.3564	1
VQEVLnGTEVNLQHLTALVDcR	1	Q9C0H2	N6(Deamidated); C21(Carbamidomethyl)	0	3.159e-10	81.84	9.91774e-08	3	2509.28	1.83198	40.1733	0
TVAGVQDRVWDTAVGLnHTAEPSLQTLER	2	Q9C0H2	N17(Deamidated)	0	1.112e-10	52.65	8.50187e-05	3	3164.61	2.86578	34.9582	1
GPMNQcLVATGTHEPKnQSYMVR	2	Q03405	C6(Carbamidomethyl); N17(Deamidated)	0	9.117e-10	47.88	0.000188184	3	2619.22	1.71928	22.1142	1
AnATIEVK	1	Q9Y639	N2(Deamidated)	0	0.00233	47.74	0.000309612	2	846.456	-0.569324	16.0073	0
nASNMEYR	1	Q9Y639	N1(Deamidated)	0.001	0.02759	29.71	0.00187085	2	985.405	0.679513	14.7463	0
AEDSGEYHcVYHFVSAPKAnATIEVK	2	Q9Y639	C9(Carbamidomethyl); N20(Deamidated)	0	5.643e-18	83.49	5.7755e-08	3	2923.36	0.620654	25.8352	1
IVTSEEVIIRDSPVLPVTLQcnLTSSSHTLTYSYWTK	1	Q9Y639	C21(Carbamidomethyl); N22(Deamidated)	0	1.95e-10	29.48	0.0109902	4	4239.16	1.35236	42.0825	1
GDKnVTmGQSSAR	1	P48960	N4(Deamidated); M7(Oxidation)	0	1.33e-06	53.7	2.75144e-05	2	1367.62	0.412316	4.59688	1
TFKnESENTcQDVDEcQQNPR	2	P48960	N4(Deamidated); C10(Carbamidomethyl); C16(Carbamidomethyl)	0	1.74e-07	62.39	9.22826e-07	3	2600.07	0.981242	16.4834	1
RLSAVNSIFLSHnNTK	1	P48960	N13(Deamidated)	0	1.388e-08	57.37	3.05997e-05	3	1801.96	0.379946	22.1201	1
LSAVNSIFLSHnNTK	2	P48960	N12(Deamidated)	0	7.803e-10	69.29	1.90183e-06	3	1645.85	-0.446223	26.3184	0
nGSLFAFR	1	P04004	N1(Deamidated)	0	0.008765	51.29	6.61287e-05	2	912.457	-0.0583868	34.6144	0
nISDGFDGIPDNVDAALALPAHSYSGR	1	P04004	N1(Deamidated)	0	4.183e-10	54.17	6.31661e-05	3	2773.31	2.34922	44.2341	0
VAnGSSLVVPQGGQGTIDTAVLHLDTNLDIR	1	Q6UVK1	N3(Deamidated)	0	4.164e-10	53.13	5.56936e-05	3	3161.65	1.79082	42.2733	0
AGQPATAFSQQDLLDGAVLYSHnGSLSPR	1	Q6UVK1	N23(Deamidated)	0	5.694e-12	52.98	8.96231e-05	3	3001.47	1.3607	37.9144	0
FLKPYTLEEQKnLTVcPDGALFEQK	2	P54709	N12(Deamidated); C16(Carbamidomethyl)	0	1.409e-12	66.82	3.08835e-06	3	2969.51	3.6397	32.9892	1
NTnSSNnFSR	1	Q9H0X4	N3(Deamidated); N7(Deamidated)	0	0.002026	52.52	1.34342e-05	2	1142.47	0.293841	9.58997	0
YKPDTLAVAVEnGTGTDR	2	Q9H0X4	N12(Deamidated)	0	5.246e-08	62.59	9.19849e-06	2	1907.94	1.80225	25.5923	0
YGEnNSLSVEGFR	1	Q13433	N4(Deamidated)	0	2.595e-07	105.27	2.15446e-10	2	1472.67	0.706246	28.7984	0
YGEnNSLSVEGFRK	2	Q13433	N4(Deamidated)	0	1.042e-08	91.91	8.72849e-09	2	1600.76	0.878943	22.3937	1
LLTSHGMGIQVPLnATEFNYLcPAIINQIDAR	2	Q13433	N14(Deamidated); C22(Carbamidomethyl)	0	2.297e-10	94.87	4.13813e-09	3	3570.82	2.58508	48.2037	0
VVnSTTGPGEHLR	2	P07996	N3(Deamidated)	0	7.699e-07	79.49	1.59132e-07	3	1367.69	0.143459	14.4512	0
GVLMVGnETTYEDGHGSRKnITDLVEGAK	1	Q8IWA5	N7(Deamidated); N20(Deamidated)	0	1.566e-05	24.7	0.0564176	4	3092.49	1.82881	29.4003	2
GVLMVGnETTYEDGHGSR	1	Q8IWA5	N7(Deamidated)	0	7.633e-10	73.89	3.24614e-07	3	1922.86	0.183319	23.6966	0
KnITDLVEGAK	2	Q8IWA5	N2(Deamidated)	0	2.106e-07	89.54	2.14008e-08	2	1188.65	0.851041	23.7297	1
KnITDLVEGAKK	1	Q8IWA5	N2(Deamidated)	0	0.0008168	34.58	0.00421488	3	1316.74	0.758572	19.4413	2
nITDLVEGAK	1	Q8IWA5	N1(Deamidated)	0	0.002596	46.22	0.000540839	2	1060.55	0.492765	33.6087	0
TcNPETFPSSnESR	1	Q8IWA5	C2(Carbamidomethyl); N11(Deamidated)	0	7.153e-08	71.44	1.68682e-07	2	1626.67	1.64495	19.2424	0
AnNSWFQSILR	2	Q92542	N2(Deamidated)	0	0.001432	59.66	1.64378e-05	2	1336.67	2.09972	39.5145	0
TSLELWMHTDPVSQKnESVR	2	Q92542	N16(Deamidated)	0	3.888e-11	63.27	8.10081e-06	3	2358.14	0.294557	27.8908	1
nISGVVLADHSGAFHNK	1	Q92542	N1(Deamidated)	0	9.088e-08	50.8	0.000143479	3	1766.88	-0.128594	24.1166	0
AnTTQPGIVEGGQVLK	1	P06756	N2(Deamidated)	0	5.726e-08	54.29	4.93419e-05	2	1612.86	0.994007	26.297	0
TAADTTGLQPILNQFTPAnISR	2	P06756	N19(Deamidated)	0	3.513e-10	98.67	2.32951e-09	2	2330.2	0.8428	43.4094	0
SLLWTETFMNKENQnHSYSLK	1	P06756	N15(Deamidated)	0	6.723e-07	32.19	0.00908943	4	2571.22	-1.17551	30.566	1
nMTISR	1	P06756	N1(Deamidated)	0.006	0.172	33.87	0.00432765	2	722.35	-0.734168	15.7461	0
LScAFKTEnQTR	2	P06756	C3(Carbamidomethyl); N9(Deamidated)	0	2.26e-05	27.11	0.0208154	2	1455.69	1.86792	14.824	1
SVYAHFPINVVIQEnGSLVEIR	1	P32969	N15(Deamidated)	0	3.391e-07	44.83	0.000458748	3	2485.31	-0.22883	41.8876	0
KNYnNTWTR	2	O75054	N4(Deamidated)	0	0.0001351	47.2	0.000199121	2	1197.57	0.617909	12.6122	1
VQGnSTLLHITDLQAR	2	O75054	N4(Deamidated)	0	3.798e-11	114.89	4.58941e-11	2	1766.94	-1.0966	30.0169	0
NYnNTWTR	1	O75054	N3(Deamidated)	0.001	0.01514	31.71	0.00350755	2	1069.47	0.57712	17.941	0
AEDTAGQTALTVMRPDASLQVDTVVPnATVSEK	1	O75054	N27(Deamidated)	0	4.081e-06	23.48	0.0709018	3	3415.7	2.39949	38.3151	0
DTGELnVTSILDREETPFFLLTGYALDAR	1	Q14126	N6(Deamidated)	0	1.073e-05	24.07	0.0677713	3	3257.62	-1.93144	54.9424	1
FAEInGSALcSYNLKPSEYTTSPK	1	Q8WWI5	N5(Deamidated); C10(Carbamidomethyl)	0	1.761e-10	64.41	4.96273e-06	3	2678.27	1.99227	31.722	0
GAnDSTSAMPEQMK	1	O95084	N3(Deamidated)	0	1.231e-08	94.44	5.75599e-10	2	1467.61	0.298015	19.5711	0
KIIGIFSGHQWVDMnGSPQDFNVAVR	1	O95084	N15(Deamidated)	0	0.0009488	10.71	1.64316	4	2916.44	-0.613276	36.8528	1
EIFVAnGTQGKLTcK	2	O95297	N6(Deamidated); C14(Carbamidomethyl)	0	3.178e-08	71.06	1.23782e-06	2	1666.85	0.00607547	22.4797	1
EIFVAnGTQGK	1	O95297	N6(Deamidated)	0	0.0002495	56.49	3.65753e-05	2	1164.59	0.785169	22.1402	0
VSDTVVEPYnATLSVHQLVENTDETYcIDNEALYDIcFR	2	P68371;P07437;Q9BUF5	N10(Deamidated); C27(Carbamidomethyl); C37(Carbamidomethyl)	0	1.422e-05	23.29	0.0421932	4	4594.11	4.05318	47.4649	0
VQPFnVTQGK	1	P13473	N5(Deamidated)	0	0.00208	42.03	0.000946187	2	1118.58	0.705504	23.0485	0
WQMnFTVR	1	P13473	N4(Deamidated)	0.001	0.02657	32.79	0.00399773	2	1082.51	1.92567	32.0542	0
LnSSTIK	1	P13473	N2(Deamidated)	0.002	0.0643	39.76	0.00159051	2	763.419	-0.524284	12.0036	0
IAVQFGPGFSWIAnFTK	2	P13473	N14(Deamidated)	0	3.785e-09	78.42	2.0359e-07	3	1883.97	0.525287	50.6907	0
YGccPMPnATccSDHLHccPQDTVcDLIQSK	1	P28799	C3(Carbamidomethyl); C4(Carbamidomethyl); N8(Deamidated); C11(Carbamidomethyl); C12(Carbamidomethyl); C18(Carbamidomethyl); C19(Carbamidomethyl); C25(Carbamidomethyl)	0	1.386e-05	16.86	0.0205575	4	3785.49	4.68443	29.5648	0
cLSKEnATTDLLTKLPAHTVGDVK	1	P28799	C1(Carbamidomethyl); N6(Deamidated)	0	5.559e-08	36.61	0.00296851	4	2612.36	1.73537	27.5718	2
EGPYDVVVLPGGNLGAQnLSESAAVKEILKEQENR	1	Q99497	N18(Deamidated)	0	1.062e-05	18.17	0.155453	4	3724.92	5.10359	40.0362	2
SFKVPIQAnETLVGAVINnVSEAMETLTR	1	P43003	N9(Deamidated); N19(Deamidated)	0	1.184e-13	89.3	1.53912e-08	3	3133.62	2.11138	55.1596	1
MDPPcTnTTAASTYLNNPYVR	2	P10619	C5(Carbamidomethyl); N7(Deamidated)	0	2.356e-10	71.63	5.70267e-07	2	2387.07	1.10631	33.9929	0
VLLGnEScTLTLSESTMNTLK	2	P08581	N5(Deamidated); C8(Carbamidomethyl)	0	1.807e-07	73.34	7.60053e-07	2	2312.14	0.819913	39.1875	0
MVINVHEAGRnFTVAcQHR	1	P08581	N11(Deamidated); C16(Carbamidomethyl)	0	7.998e-05	12.04	0.990899	4	2240.08	0.520904	21.572	1
FINFFVGNTInSSYFPDHPLHSISVR	1	P08581	N11(Deamidated)	0	5.521e-09	31.95	0.0114887	4	3009.49	-0.346661	40.9144	0
nFTVAcQHR	1	P08581	N1(Deamidated); C6(Carbamidomethyl)	0	0.003821	24.56	0.0204718	2	1133.52	0.52196	15.5274	0
HVYNnLTEEQK	1	Q9H6B4	N5(Deamidated)	0	3.457e-06	54.55	4.05118e-05	2	1375.65	1.31942	15.007	0
HVYNnLTEEQKGR	2	Q9H6B4	N5(Deamidated)	0	3.274e-07	83.56	7.97404e-08	2	1588.77	1.1995	13.3933	1
SAEFFnYTVR	1	O60568	N6(Deamidated)	0	0.000154	67.59	1.59375e-06	2	1234.58	2.0625	31.1873	0
SEASEGnITVTcR	1	Q29983	N7(Deamidated); C12(Carbamidomethyl)	0	1.199e-05	89.2	6.67257e-09	2	1424.63	0.591689	18.8309	0
AKPQGQWAEDVLGnKTWDRETR	1	Q29983	N14(Deamidated)	0	9.091e-09	32.67	0.00889541	4	2586.27	0.663392	23.9163	2
VcEIHEDnSTR	2	Q29983	C2(Carbamidomethyl); N8(Deamidated)	0	4.528e-06	71.28	2.34591e-07	2	1360.58	0.85178	9.23175	0
GnVTQHVQGHR	2	Q15043	N2(Deamidated)	0	7.931e-06	72.42	8.50602e-07	2	1233.61	0.673761	6.30843	0
KVEVEPLnSTAVHVYWK	1	P10586	N8(Deamidated)	0	0.00194	15.14	0.46848	3	2000.05	0.0480051	28.2787	1
DINSQQELQnITTDTR	1	P10586	N10(Deamidated)	0	6.251e-08	67.97	2.18635e-06	2	1876.89	0.258004	30.8841	0
IVLnFTTMDLYK	1	O43897	N4(Deamidated)	0	1.639e-07	83.1	8.37522e-08	2	1458.75	-0.0884035	43.0535	0
IWPGGVIPYVIGGnFTGSQR	1	O43897	N14(Deamidated)	0	0.0004036	11.46	1.13605	2	2119.1	3.34969	47.5114	0
GFQDVEAQAATcnHTVMALMASLDAEKAQGQK	1	Q10589	C12(Carbamidomethyl); N13(Deamidated)	0	1.052e-07	17.28	0.234771	4	3421.59	2.89412	39.0748	1
DVncSVMGPQEK	1	P53634	N3(Deamidated); C4(Carbamidomethyl)	0	0.004407	10.32	0.301914	2	1364.58	0.394187	21.5404	0
VTTYcnETMTGWVHDVLGR	1	P53634	C5(Carbamidomethyl); N6(Deamidated)	0	8.86e-10	91.42	7.10291e-09	3	2240.02	2.06692	38.7695	0
TVLTPATnHMGnVTFTIPANR	1	P01024	N8(Deamidated); N12(Deamidated)	0	0.001364	27.97	0.0276087	2	2257.14	5.72298	31.6773	0
TVLTPATNHMGnVTFTIPANR	1	P01024	N12(Deamidated)	0	2.353e-07	55.01	5.22153e-05	3	2256.15	0.745021	31.7338	0
VVVLPTnnSVSGELILEELEVFKNHAPITTMK	1	Q99985	N7(Deamidated); N8(Deamidated)	0	0.0002712	14.62	0.182926	3	3523.89	7.20118	46.7965	1
VIIPEKSQnFSALKK	2	P14384	N9(Deamidated)	0	8.674e-05	40.8	0.000390929	4	1702.97	0.657081	21.5686	2
TVAQnYSSVTHLHSIGK	1	P14384	N5(Deamidated)	0	4.155e-09	59.69	1.76671e-05	3	1842.93	-0.273036	21.0464	0
ELLLHLIDYLVTSDGKDPEITNLInSTR	2	P14384	N25(Deamidated)	0	9.524e-15	69.99	8.72006e-07	3	3183.69	2.32715	52.4616	1
NFPDAFEYNnVSRQPETVAVMK	1	P14384	N10(Deamidated)	0	1.374e-05	26.47	0.0339263	3	2557.21	1.54229	33.3517	1
SPVQEnSSDLNK	1	Q9NY35	N6(Deamidated)	0	3.547e-06	74.61	3.00967e-07	2	1318.61	0.788312	14.8621	0
YnGTVGLWR	1	Q9NY35	N2(Deamidated)	0	0.00339	52.29	7.14143e-05	2	1066.53	0.34947	28.8395	0
VGSTnVSTLVNVHFAPR	1	Q96J84	N5(Deamidated)	0	5.036e-09	78.15	1.9751e-07	3	1798.94	0.0216798	31.2761	0
IDGGPVILLQAGTPHnLTcR	1	Q96J84	N16(Deamidated); C19(Carbamidomethyl)	0	5.236e-10	48.41	0.000242996	3	2133.11	0.693968	34.817	0
AVLPcVLLnYSGIVQWTK	2	Q96J84	C5(Carbamidomethyl); N9(Deamidated)	0	1.493e-07	60.6	1.11483e-05	2	2062.11	1.44708	50.1455	0
LIFnITASVPLPDERnDTLEWENQQR	1	Q4LDE5	N4(Deamidated); N16(Deamidated)	0	1.758e-06	44.64	0.000628711	3	3100.53	0.941251	45.8849	1
nISDcKAQcK	1	Q4LDE5	N1(Deamidated); C5(Carbamidomethyl); C9(Carbamidomethyl)	0	9.646e-05	42.16	0.000343596	2	1224.53	-0.25632	8.32943	1
SVcLEnGTWTSPPIcR	1	Q4LDE5	C3(Carbamidomethyl); N6(Deamidated); C15(Carbamidomethyl)	0	2.209e-06	62.72	4.91799e-06	2	1877.85	-1.50946	32.7828	0
MDKSDAVSHTGnYTcEVTELTR	1	Q08722	N12(Deamidated); C15(Carbamidomethyl)	0	1.132e-14	95.23	2.21938e-09	3	2515.11	0.848497	25.0242	1
LLSTANYnTSHYNNDLWQIFENPVDWKEK	4	O00469	N8(Deamidated)	0	0.001939	15.2	0.409203	4	3540.68	2.63427	41.5973	1
FLRYncSIESPR	1	O00469	N5(Deamidated); C6(Carbamidomethyl)	0	7.551e-06	35.66	0.00350421	3	1542.74	-0.24948	22.7508	1
YncSIESPR	1	O00469	N2(Deamidated); C3(Carbamidomethyl)	0	0.0003867	44.73	0.000132922	2	1126.48	0.38256	17.5562	0
LTHLHEGLPVKnGTR	1	O00469	N12(Deamidated)	0	7.253e-05	55.46	4.05336e-05	4	1672.91	0.0653611	14.8179	1
InTTADEKDPTNPFRFPNIGVEK	1	O14672	N2(Deamidated)	0	1.389e-05	18.51	0.241693	4	2604.29	-0.397718	31.6525	2
nISQVLEK	1	O14672	N1(Deamidated)	0.001	0.01717	39.93	0.00191563	2	931.509	-0.872465	26.3443	0
LATIAnFSALGLEPGR	1	O76082	N6(Deamidated)	0	1.076e-09	128.69	2.2174e-12	2	1630.88	-0.409129	42.8809	0
nHTVPLR	1	O76082	N1(Deamidated)	0.005	0.1544	21.44	0.0506045	2	837.458	0.0644458	13.2033	0
cATPHGDnASLEATFVKR	2	P23142	C1(Carbamidomethyl); N8(Deamidated)	0	7.18e-11	62.28	8.40018e-06	3	1974.94	1.72092	20.8229	1
IVnETLYENTK	1	P19075	N3(Deamidated)	0	4.235e-05	69.96	1.36249e-06	2	1324.66	1.20268	22.3383	0
NLMIDIQKDTAVEGEEIEVncTAMASKPATTIR	2	Q9BY67	N20(Deamidated); C21(Carbamidomethyl)	0	1.444e-10	65.26	5.19751e-06	4	3649.79	2.4888	35.4086	1
DVTVIEGEVATIScQVnKSDDSVIQLLNPNR	1	Q9BY67	C14(Carbamidomethyl); N17(Deamidated)	0	3.319e-08	59.87	1.48891e-05	3	3414.71	1.01397	50.4759	1
NWQLTEEDFGnTSGR	1	P30825	N11(Deamidated)	0	4.671e-07	54.26	1.91236e-05	2	1754.77	2.19017	32.0121	0
LcLNnDTK	1	P30825	C2(Carbamidomethyl); N5(Deamidated)	0.001	0.0146	53.39	3.80258e-05	2	978.457	0.427441	16.2674	0
LAFQNMnGSEYFVK	1	Q13421	N7(Deamidated)	0	1.671e-08	91.17	9.81529e-09	2	1648.77	0.733351	34.5217	0
IQSFLGGAPTEDLKALSQQnVSMDLATFMK	1	Q13421	N20(Deamidated)	0	1.063e-08	53.43	7.85319e-05	3	3241.61	-0.132603	47.3064	1
LTGSDVNLLAENLLSPEDMVLFHnLTQPR	1	P01130	N24(Deamidated)	0	1.079e-11	77.89	2.70654e-07	3	3237.65	0.620567	53.4293	0
AKGnGSSQPGTAR	1	Q9UL25	N4(Deamidated)	0.001	0.0329	33.51	0.00612777	2	1231.6	0.668928	2.97493	1
KDnITAHNISWR	1	Q9Y6M7	N3(Deamidated)	0	3.203e-05	26.71	0.0289028	3	1455.73	-0.444299	18.6969	1
SnLTVLR	1	P18084	N2(Deamidated)	0.002	0.05235	41.06	0.00115948	2	803.462	-0.268387	22.2086	0
VLHnGTLAELQGLPHIR	2	Q13641	N4(Deamidated)	0	1.425e-08	43.49	0.000353694	3	1869.03	-0.573608	28.7133	0
RPPLAELAALnLSGSRLDEVR	1	Q13641	N11(Deamidated)	0	5.078e-05	21.41	0.0415593	4	2278.25	0.691391	34.194	1
nLTEVPTDLPAYVR	1	Q13641	N1(Deamidated)	0	0.01211	18.08	0.280074	2	1588.83	2.71905	39.7662	0
ELLLDFAnSSAELTGcLVR	1	Q86WC4	N8(Deamidated); C16(Carbamidomethyl)	0	3.242e-06	45.41	0.000507861	2	2109.05	0.308848	49.8692	0
AAGnTSESQScAR	1	Q86WC4	N4(Deamidated); C11(Carbamidomethyl)	0	1.997e-07	81.63	1.64896e-08	2	1339.56	0.840742	4.38363	0
DYnSSREDSLQDAWDYVQAQVK	1	P27701	N3(Deamidated)	0	1.472e-09	63	3.60855e-06	3	2618.17	1.56246	41.315	1
DTGKDAVncTYKNEDDcVVR	1	P05106	N8(Deamidated); C9(Carbamidomethyl); C17(Carbamidomethyl)	0	1.434e-10	63.14	2.30512e-06	3	2360.02	2.02544	18.565	2
YKVPAEILAnTSDNAGFcIPEGNcLGSGVLnVSIcK	1	Q14108	N10(Deamidated); C18(Carbamidomethyl); C24(Carbamidomethyl); N31(Deamidated); C35(Carbamidomethyl)	0	3.509e-07	51.94	8.54046e-05	3	3869.85	3.8689	44.7658	1
NKANIQFGDnGTTISAVSNK	2	Q14108	N10(Deamidated)	0	1.446e-07	28.03	0.0276234	3	2080.03	1.69493	23.4082	1
TMVFPVMYLnESVHIDKETASR	2	Q14108	N10(Deamidated)	0	2.054e-09	50.79	0.000146311	3	2568.25	1.48214	36.5492	1
TTnSSAADPR	1	Q9UHN6	N3(Deamidated)	0	0.0003943	62.47	3.539e-06	2	1020.46	0.587153	6.30001	0
TLnSSGLPFGSYTFEKDFSR	1	Q9UHN6	N3(Deamidated)	0	6.113e-08	52.87	8.10774e-05	3	2254.06	-1.28107	37.1053	1
LRPHFLSVcNPDFSQIncSEGYIQNYR	1	O14495	C9(Carbamidomethyl); N17(Deamidated); C18(Carbamidomethyl)	0	5.12e-12	94.3	5.07146e-09	3	3315.54	3.0576	32.973	0
VYKTYnGTNPDAASR	2	O60637	N6(Deamidated)	0	6.889e-06	64.16	4.8539e-06	2	1657.79	2.19487	14.4191	1
ATLITFLcDRDAGVGFPEYQEEDnSTYNFR	1	P11717	C8(Carbamidomethyl); N24(Deamidated)	0	2.993e-10	55.78	2.15356e-05	3	3529.59	1.73803	43.694	1
LNPGnYTAR	1	P08069	N5(Deamidated)	0	0.001451	54.82	4.87822e-05	2	1006.5	-0.101852	18.3849	0
TnASVPSIPLDVLSASnSSSQLIVK	1	P08069	N2(Deamidated); N17(Deamidated)	0	6.42e-07	40.98	0.00100148	2	2529.34	5.45439	47.3914	0
EAGnHTSGAGLVQINK	2	P20645	N4(Deamidated)	0	4.976e-07	74.76	5.86512e-07	2	1596.8	2.64916	19.0641	0
LASPPSQGEVPPGPLPEAVLALYnSTR	2	P01137	N24(Deamidated)	0	2.176e-07	58.14	2.18683e-05	2	2761.45	1.91031	48.4801	0
DMnQTLGDnITVK	1	Q8TCT8	N3(Deamidated); N9(Deamidated)	0	3.513e-06	41.44	0.000728561	2	1450.67	0.0482548	31.6203	0
YFYNnQTK	1	P10646	N5(Deamidated)	0.001	0.04162	35.33	0.00203697	2	1078.48	0.61145	17.6902	0
GSLSYLnVTRK	1	P07339	N7(Deamidated)	0	0.000552	29.13	0.0136231	2	1238.67	0.320266	21.6576	1
YYKGSLSYLnVTR	1	P07339	N10(Deamidated)	0	0.011	26.54	0.0342711	3	1564.8	1.18613	25.1383	1
cnYSIRVER	1	P00736	C1(Carbamidomethyl); N2(Deamidated)	0.009	0.2426	12.73	0.608002	3	1197.57	-0.588138	17.4952	1
YEQLQnETR	1	P11117	N6(Deamidated)	0	0.0004678	51.97	5.36855e-05	2	1181.55	1.58802	15.2418	0
YHGFLnTSYHR	1	P11117	N6(Deamidated)	0	7.329e-06	49.4	9.7019e-05	3	1395.64	-0.25573	18.585	0
DLGPTLAnSTHHNVR	1	P04062	N8(Deamidated)	0	1.711e-05	59.1	2.17142e-05	3	1632.81	0.794652	18.2052	0
nKTYFSPR	1	O95274	N1(Deamidated)	0.002	0.04876	22.71	0.0468822	2	1013.51	0.377332	15.7537	1
SNAPLVnVTLYYEALcGGcR	1	P13284	N7(Deamidated); C16(Carbamidomethyl); C19(Carbamidomethyl)	0	2.331e-10	76.66	2.66481e-07	2	2258.05	-1.81246	46.3735	0
GnSTLSVPK	1	Q9NUN5	N2(Deamidated)	0	0.002077	73.36	7.28882e-07	2	903.479	0.439367	17.945	0
NPVGLIGAEnATGETDPSHSK	1	P43251	N10(Deamidated)	0	3.412e-10	72.5	8.60382e-07	3	2095	1.72526	24.4279	0
SVNPnDTcLAScVK	1	O95857	N5(Deamidated); C8(Carbamidomethyl); C12(Carbamidomethyl)	0	9.761e-05	67.1	1.09191e-06	2	1565.69	0.963526	22.7479	0
VTGLncTTNHPINPK	2	P08648	N5(Deamidated); C6(Carbamidomethyl)	0	1.324e-05	55.05	4.86105e-05	3	1666.82	0.488146	17.9778	0
QYnSTGDYR	1	O43657	N3(Deamidated)	0	9.476e-05	66.31	4.79462e-07	2	1104.46	0.238085	13.323	0
ESLNLWYDcTWNnDTK	1	P54852	C9(Carbamidomethyl); N13(Deamidated)	0	2.693e-07	65.83	1.0318e-06	2	2059.88	3.62732	39.4249	0
LSGnLTLLR	1	Q9UIW2	N4(Deamidated)	0	0.0001087	65.59	2.98142e-06	2	987.583	-0.439415	29.9421	0
DLGAIVYcVGVKDFnETQLAR	2	Q9H6X2	C8(Carbamidomethyl); N15(Deamidated)	0	2.77e-11	52.71	9.40323e-05	3	2369.18	1.11491	42.2487	1
VLnASTLALALANLnGSR	1	O75462	N3(Deamidated); N15(Deamidated)	0	6.189e-07	62.41	7.29128e-06	3	1799.99	-0.510349	50.6461	0
FVGTPEVnQTTLYQR	1	P01033	N8(Deamidated)	0	7.135e-07	56.09	3.57983e-05	2	1753.88	1.56579	29.7601	0
SHnRSEEFLIAGK	2	P01033	N3(Deamidated)	0	0.00235	29.37	0.0189602	2	1488.75	1.14184	18.019	1
RIFPSGnVTSVLELSSNPAHR	1	Q9P273	N7(Deamidated)	0	3.937e-07	22.93	0.0774183	3	2282.19	-0.343456	31.5038	1
GVFITnETGQPLIGK	1	P10253	N6(Deamidated)	0	3.398e-05	57.54	2.74868e-05	2	1574.85	1.58174	34.471	0
VLEAVnGTDAR	1	O60487	N6(Deamidated)	0	0.00036	55.34	4.82485e-05	2	1145.58	-0.104626	19.9218	0
SWPAVGncSSALR	1	P02790	N7(Deamidated); C8(Carbamidomethyl)	0	5.951e-06	55.31	2.7972e-05	2	1405.65	-0.478085	26.8719	0
YHQPGHEAVTSAVDQLQQEFHccGSnNSQDWR	2	P48509	C22(Carbamidomethyl); C23(Carbamidomethyl); N26(Deamidated)	0	2.06e-12	49.4	3.32965e-05	4	3786.61	2.59738	29.148	0
ASQnITYHcK	1	P02461	N4(Deamidated); C9(Carbamidomethyl)	0	3.735e-05	52.91	4.42605e-05	2	1222.56	3.23631	9.17299	0
RnASAVVLYNEER	1	Q8NC42	N2(Deamidated)	0	3.523e-07	52	0.000102215	2	1521.77	0.972647	20.1039	1
nASAVVLYNEER	1	Q8NC42	N1(Deamidated)	0	0.002357	16.76	0.298371	2	1365.66	-0.22343	27.8214	0
AKnNTVTPGGKPNK	1	P18077	N3(Deamidated)	0	0.002779	30.16	0.0107467	2	1426.77	0.600918	4.64645	1
LALnLTLR	1	P55268	N4(Deamidated)	0	0.006005	50.57	5.0866e-05	2	914.567	-0.316336	33.8935	0
TFnASGVKPQR	2	Q8IZP9	N3(Deamidated)	0	0.001171	45.36	0.000522474	2	1205.63	1.0122	14.8322	0
nGTQVHGTITGVDVSMNTHLK	1	P62314	N1(Deamidated)	0	1.945e-11	50.04	0.000168441	3	2210.09	0.871508	25.9806	0
nSTSIYFK	1	P19256	N1(Deamidated)	0	0.007249	49.4	0.000137778	2	960.468	0.407787	24.967	0
RRGnISAVAVR	1	Q9Y4D7	N4(Deamidated)	0	0.0004434	47.9	0.000175155	3	1199.7	-1.18374	12.5086	2
LVSGnLTDR	1	Q6UY14	N5(Deamidated)	0.002	0.04729	20.91	0.129754	2	975.511	0.322453	19.1414	0
MLnASIVASFVELPLASIVSLHASScGGR	1	P17813	N3(Deamidated); C26(Carbamidomethyl)	0	7.326e-10	47.44	0.000269551	3	2987.53	-0.240851	54.4758	0
SIVYScEWPLYMWPFQKPnYTEIR	1	P06280	C6(Carbamidomethyl); N19(Deamidated)	0	1.937e-10	46.43	0.000333302	3	3108.47	3.44381	47.2826	0
RnQSLSLLYK	1	Q06481	N2(Deamidated)	0	0.008534	20.16	0.109877	2	1222.68	0.462696	22.4387	1
LSALDNLLnHSSMFLK	1	Q9Y4L1	N9(Deamidated)	0	8.624e-09	44.98	0.000551188	3	1803.93	0.832608	41.5813	0
AVLVNnITTGER	1	Q8NBJ4	N6(Deamidated)	0	0.001667	12.4	1.04442	2	1287.69	1.12819	25.2125	0
LQQDVLQFQKnQTNLER	1	Q8NBJ4	N11(Deamidated)	0	1.974e-06	44.08	0.000709376	3	2103.09	1.27393	26.1285	1
YSLnVTYNYPVHYFDGR	1	Q9NV96	N4(Deamidated)	0	6.517e-09	42.62	0.000582572	3	2108.97	0.592704	34.8888	0
LnDTVGVTKK	1	Q16787	N2(Deamidated)	0	0.003718	29.21	0.0164931	2	1075.6	2.15216	13.5144	1
FnGSVSFFR	1	P55083	N2(Deamidated)	0	0.001645	40.77	0.0010511	2	1061.51	0.743918	32.3129	0
nVScLWcNTNK	1	P53801	N1(Deamidated); C4(Carbamidomethyl); C7(Carbamidomethyl)	0	3.753e-05	40.03	0.000352556	2	1396.6	0.343156	28.6077	0
TFAnGSLAFR	1	Q8WWB7	N4(Deamidated)	0	0.0011	39.13	0.00119736	2	1084.54	1.61876	29.4313	0
IAPASnVSHTVVLRPLK	3	P43308	N6(Deamidated)	0	5.795e-05	26.98	0.00521163	2	1803.05	2.15335	23.4041	0
NLnMSR	1	Q5W064	N3(Deamidated)	0.004	0.1154	36.89	0.0024148	2	735.346	0.343224	12.7054	0
InSTADLDFIQQAISYSSFPFWMGLSR	1	P78380	N2(Deamidated)	0	3.561e-08	36.6	0.00342385	3	3095.49	1.10466	56.7385	0
GIcnSSDVR	1	O75882	C3(Carbamidomethyl); N4(Deamidated)	0	0.006197	28.09	0.00908146	2	1008.44	0.286342	13.9729	0
ELKLnASLPALLLIR	1	Q15904	N5(Deamidated)	0	0.001343	35.89	0.000257022	3	1665.03	0.936072	45.5778	1
KFnnLKFnYTK	1	Q6ZP82	N3(Deamidated); N4(Deamidated); N8(Deamidated)	0.001	0.01461	35.29	0.00517652	2	1419.71	-1.11608	20.7107	2
LTILYLFnNSLASLPGEALADLPSLEFLR	2	Q86UN3	N8(Deamidated)	0	0.0003623	26.78	0.0111244	3	3191.73	1.67807	56.8124	0
VTQnLTLIEESLTSEFIHDIDRELK	1	P36955	N4(Deamidated)	0	2.699e-07	33.23	0.00696366	4	2944.52	1.88597	49.5803	1
KGYFYIPPLATHTIcDRnHTWLPVSDDAcYR	1	P15529	C15(Carbamidomethyl); N18(Deamidated); C29(Carbamidomethyl)	0	3.092e-10	25.75	0.03286	4	3767.77	-1.20063	33.8876	2
GYFYIPPLATHTIcDRnHTWLPVSDDAcYR	1	P15529	C14(Carbamidomethyl); N17(Deamidated); C28(Carbamidomethyl)	0	2.914e-07	13.83	0.52785	4	3639.68	0.299706	37.7628	1
LWnFTMNAK	1	Q86SQ4	N3(Deamidated)	0	0.004061	24.15	0.0355747	2	1125.54	0.582451	33.1238	0
nATTPLWR	1	O75954	N1(Deamidated)	0.001	0.01607	31.68	0.00967865	2	959.494	-0.628682	27.8298	0
VWnSTFIEDYRDFDRVR	1	P26006	N3(Deamidated)	0	0.001146	12.69	0.855849	4	2219.05	-0.568511	33.5034	2
nITIVTGAPR	1	P26006	N1(Deamidated)	0	0.002753	30.48	0.0085955	2	1042.59	0.206953	28.1051	0
GLSPGnYSVR	1	P06213	N6(Deamidated)	0.001	0.01439	29.94	0.0148031	2	1050.52	0.623524	21.5238	0
LVQAEYWHDPIKEDVYRnHSIFLADINQER	1	P50897	N18(Deamidated)	0	2.421e-07	20.16	0.144574	4	3699.83	3.25154	32.7168	2
IAnETR	1	P08236	N3(Deamidated)	0.009	0.2423	25.23	0.0475367	2	704.356	-1.34225	4.60856	0
IAnETRYPHSVAK	1	P08236	N3(Deamidated)	0	0.0009924	22.67	0.0857096	2	1486.77	1.24696	13.1966	1
GGGDPWTnGSGLALcQR	1	Q9GZU1	N8(Deamidated); C15(Carbamidomethyl)	0	0.0002685	22.49	0.0403001	2	1746.79	1.0043	32.2918	0
TTLVDNNTWnNSHIALVGK	2	Q8TCJ2	N10(Deamidated)	0	7.481e-05	21.3	0.121204	3	2098.06	0.113189	30.7821	0
MFSncSK	1	P78536	N4(Deamidated); C5(Carbamidomethyl)	0.001	0.02523	10.85	0.0820295	2	874.343	-0.303185	10.9263	0
AcTEAEFAcHSYnEcVALEYR	2	P98160	C2(Carbamidomethyl); C9(Carbamidomethyl); N13(Deamidated); C15(Carbamidomethyl)	0	1.124e-09	106.34	2.55501e-11	2	2581.04	-0.908299	28.3371	0
QKDnGcFR	2	P01023	N4(Deamidated); C6(Carbamidomethyl)	0	0.002723	37.75	0.000931736	2	1025.45	0.352942	6.39864	1
IISAnGcK	1	P05023	N5(Deamidated); C7(Carbamidomethyl)	0	0.001344	56.06	3.60465e-05	2	863.429	-0.265984	10.1926	0
IISAnGcKVDNSSLTGESEPQTR	3	P05023	N5(Deamidated); C7(Carbamidomethyl)	0	1.103e-11	89.33	1.67437e-08	2	2464.17	1.79379	22.4962	1
RVNncSDMcFHQK	2	Q92626	N4(Deamidated); C5(Carbamidomethyl); C9(Carbamidomethyl)	0	3.433e-08	53.85	8.8601e-06	3	1696.7	-0.166647	10.515	1
VNncSDMcFHQK	1	Q92626	N3(Deamidated); C4(Carbamidomethyl); C8(Carbamidomethyl)	0	3.499e-06	48.64	1.36449e-05	3	1540.6	1.15357	14.7299	0
nAccSTnTSQEAHKDVSYLYR	1	P15328	N1(Deamidated); C3(Carbamidomethyl); C4(Carbamidomethyl); N7(Deamidated)	0	0.0006449	10.33	0.268781	3	2506.06	1.41936	22.2065	1
KNAccSTnTSQEAHK	1	P15328	C4(Carbamidomethyl); C5(Carbamidomethyl); N8(Deamidated)	0	1.461e-06	70.36	3.58975e-07	2	1736.74	1.8265	3.69786	1
KNAccSTnTSQEAHKDVSYLYR	2	P15328	C4(Carbamidomethyl); C5(Carbamidomethyl); N8(Deamidated)	0	8.872e-15	91.08	6.04368e-09	3	2633.18	1.1916	16.6881	2
NAccSTnTSQEAHKDVSYLYR	3	P15328	C3(Carbamidomethyl); C4(Carbamidomethyl); N7(Deamidated)	0	2.17e-09	84.12	1.78139e-08	2	2505.08	2.13474	19.3216	1
LRNPcTSEQncTSPFSYK	2	P05556	C5(Carbamidomethyl); N10(Deamidated); C11(Carbamidomethyl)	0	1.053e-10	113.4	3.01678e-11	3	2189.96	0.773186	21.6109	1
NPcTSEQncTSPFSYK	1	P05556	C3(Carbamidomethyl); N8(Deamidated); C9(Carbamidomethyl)	0	1.38e-06	35.32	0.000367206	2	1920.78	2.25978	23.257	0
AIHYALnccGLAGGVEQFISDIcPK	3	P21926	N7(Deamidated); C8(Carbamidomethyl); C9(Carbamidomethyl); C23(Carbamidomethyl)	0	1.765e-12	118.38	1.88048e-11	3	2794.31	3.07965	44.3951	0
mEVMNLMEQPIKVTEWQQTYTYDSGIHSGAnTcVPSVSSK	2	P14923	N-Term(Acetyl); N31(Deamidated); C33(Carbamidomethyl)	0	6.401e-05	15.28	0.311307	3	4589.13	7.47921	46.6557	1
FNQcnTTR	1	P05187	C4(Carbamidomethyl); N5(Deamidated)	0.001	0.02283	14.31	0.122325	2	1041.44	1.02492	8.91829	0
FNQcnTTRGNEVISVMNR	2	P05187	C4(Carbamidomethyl); N5(Deamidated)	0	1.96e-06	40.5	0.00101157	3	2140.99	0.0668139	24.0654	1
GPMNQcLVATGTHEPKnQSYMVR	2	Q03405	C6(Carbamidomethyl); N17(Deamidated)	0	9.117e-10	47.88	0.000188184	3	2619.22	1.71928	22.1142	1
TFKnESENTcQDVDEcQQNPR	2	P48960	N4(Deamidated); C10(Carbamidomethyl); C16(Carbamidomethyl)	0	1.74e-07	62.39	9.22826e-07	3	2600.07	0.981242	16.4834	1
FQSSAVmALQEAcEAYLVGLFEDTnLcAIHAK	1	P68431	M7(Oxidation); C13(Carbamidomethyl); N25(Deamidated); C27(Carbamidomethyl)	0	8.007e-10	41.19	0.00109487	3	3603.7	5.53718	50.6155	0
FQSSAVMALQEAcEAYLVGLFEDTnLcAIHAK	1	P68431	C13(Carbamidomethyl); N25(Deamidated); C27(Carbamidomethyl)	0	2.673e-12	63.31	6.32323e-06	4	3587.71	7.62829	51.6582	0

## Sheet: MCF-7-Exo
Sequence	# PSMs	Protein Group Accessions	Modifications	q-Value	PEP	IonScore	Exp Value	Charge	MH+ [Da]	ΔM [ppm]	RT [min]	# Missed Cleavages
RHEGLPGLAVQWGAIGDVGILVETMSTnDTIVSGTLPQR	2	P49327	N28(Deamidated)	0	8.483e-14	89.4	9.98894e-09	4	4089.12	2.9846	50.6998	1
HEGLPGLAVQWGAIGDVGILVETMSTnDTIVSGTLPQR	1	P49327	N27(Deamidated)	0	2.529e-06	23.45	0.0433782	3	3933.04	8.1306	54.0599	0
dDDIAALVVDnGSGMcK	1	P60709	N-Term(Acetyl); N11(Deamidated); C16(Carbamidomethyl)	0	2.251e-08	57.04	1.35422e-05	2	1822.78	0.350517	49.6907	0
eEEIAALVIDnGSGMcK	1	P63261	N-Term(Acetyl); N11(Deamidated); C16(Carbamidomethyl)	0	1.532e-10	37.83	0.0016152	2	1878.85	1.45631	52.6392	0
LnTTGVSAGcTADLLVGR	2	O15230	N2(Deamidated); C10(Carbamidomethyl)	0	3.149e-16	155.36	5.71956e-15	2	1805.91	1.15814	34.2861	0
VFDLQQNLGSVnVSTGcAPALQAQTPGLGPR	3	O15230	N12(Deamidated); C17(Carbamidomethyl)	0	2.496e-11	124.72	5.71702e-12	2	3196.62	3.15301	42.3904	0
AQQLLAnSTALEEAMLQEQQR	1	O15230	N7(Deamidated)	0	7.471e-13	113.21	7.92699e-11	3	2373.18	1.6058	39.9112	0
RLnTTGVSAGcTADLLVGR	2	O15230	N3(Deamidated); C11(Carbamidomethyl)	0	5.254e-09	101.89	1.16486e-09	3	1962.01	0.413639	29.1424	1
LVEAAEAHAQQLGQLALnLSSIILDVNQDR	2	O15230	N18(Deamidated)	0	2.217e-09	98.4	1.17803e-09	3	3230.72	4.58986	54.1057	0
DnATLQATLHAAR	1	O15230	N2(Deamidated)	0	1.42e-06	96.84	3.39503e-09	2	1382.7	0.611338	22.278	0
LnLTSPDLFWLVFR	2	O15230	N2(Deamidated)	0	3.345e-09	89.54	1.22846e-08	2	1721.93	-0.568435	55.2289	0
GVHnASLALSASIGR	2	O15230	N4(Deamidated)	0	3.24e-08	84.12	5.32479e-08	2	1453.78	0.229296	24.5893	0
KQELSRDnATLQATLHAAR	3	O15230	N8(Deamidated)	0	3.089e-16	80	1.455e-07	3	2124.12	1.20612	18.9458	2
LnASIADLQSQLR	1	O15230	N2(Deamidated)	0	4.814e-07	79.97	1.67151e-07	2	1429.77	0.410569	34.3351	0
LVGGPVAGGDPnQTIR	1	O15230	N12(Deamidated)	0	1.033e-09	77.89	2.29202e-07	2	1551.82	1.83011	25.0236	0
LHRLnASIADLQSQLR	3	O15230	N5(Deamidated)	0	2.837e-11	74.84	2.57555e-07	2	1836.01	1.33915	27.4857	1
TLSELMSQTGHLGLAnASAPSGEQLLR	3	O15230	N16(Deamidated)	0	4.21e-13	73.7	7.33717e-07	3	2782.41	1.67815	37.7405	0
LLLGGLPESGTIYnFSGcISNVFVQR	1	O15230	N14(Deamidated); C18(Carbamidomethyl)	0	2.773e-08	71.92	1.11185e-06	2	2842.45	2.27411	52.6345	0
VWQGHAnASFcPHGYGcR	3	O15230	N7(Deamidated); C11(Carbamidomethyl); C17(Carbamidomethyl)	0	8.693e-10	66.69	6.32153e-07	2	2104.89	1.84483	19.7048	0
GInASSMAWAR	1	O15230	N3(Deamidated)	0	0.0003698	64.62	3.79658e-06	2	1164.55	0.411696	28.043	0
AVDRTLSELMSQTGHLGLAnASAPSGEQLLR	2	O15230	N20(Deamidated)	0	2.751e-13	63.82	6.53553e-06	4	3223.64	1.70052	38.4334	1
cEIcAPGFYGNALLPGncTR	2	O15230	C1(Carbamidomethyl); C4(Carbamidomethyl); N17(Deamidated); C18(Carbamidomethyl)	0	1.777e-09	58.71	9.6229e-06	2	2271	1.86978	38.4152	0
TQAGFADGAPHYVAFYSnATGVWLYVDDQLQQMKPHR	1	O15230	N18(Deamidated)	0	3.474e-11	52.98	6.04201e-05	4	4182.98	0.32102	43.7628	0
LVEAAEAHAQQLGQLALnLSSIILDVNQDRLTQR	2	O15230	N18(Deamidated)	0	1.412e-14	52.39	2.39358e-05	3	3729.01	5.75869	52.2429	1
GInASSmAWAR	1	O15230	N3(Deamidated); M7(Oxidation)	0	1.305e-05	46.59	0.000196256	2	1180.54	0.577385	22.1111	0
cDVcAEGFTGFPScYPTPSSSnDTR	1	O15230	C1(Carbamidomethyl); C4(Carbamidomethyl); C14(Carbamidomethyl); N22(Deamidated)	0	6.833e-06	43.19	4.78597e-05	2	2813.11	0.475569	36.4012	0
IVPLENGEIVVSLVNGRPGAMnFSYSPLLR	1	O15230	N22(Deamidated)	0	1.868e-07	39	0.000881248	3	3242.73	1.87637	47.6499	0
TLSELmSQTGHLGLAnASAPSGEQLLR	1	O15230	M6(Oxidation); N16(Deamidated)	0	2.054e-08	38.71	0.00228796	3	2798.39	-1.77072	33.2129	0
IVPLENGEIVVSLVnGRPGAMnFSYSPLLR	6	O15230	N15(Deamidated); N22(Deamidated)	0	7.686e-08	38.59	0.00115528	4	3243.71	2.03878	48.6978	0
LnLTSPDLFWLVFRYVNR	1	O15230	N2(Deamidated)	0	3.774e-05	36.71	0.00227169	3	2254.2	0.276167	54.089	1
IVPLEnGEIVVSLVnGRPGAMnFSYSPLLR	4	O15230	N6(Deamidated); N15(Deamidated); N22(Deamidated)	0	6.059e-07	34.32	0.00384621	3	3244.7	1.41933	52.1763	0
cRPnVTGR	1	O15230	C1(Carbamidomethyl); N4(Deamidated)	0.003	0.1135	24.45	0.0484545	2	960.469	0.998891	8.57253	0
YSVLIMAEKPVGDLSSPnETK	2	Q9P2B2	N18(Deamidated)	0	1.681e-10	97.76	3.04002e-09	2	2279.15	1.86726	32.4432	0
VAEAVSSPAGVGVTWLEPDYQVYLnASK	2	Q9P2B2	N25(Deamidated)	0	9.627e-09	88.29	2.49063e-08	3	2951.48	3.25484	46.7903	0
YIISLDQDSVVKLEnWTDASRVDGVVLEK	1	Q9P2B2	N15(Deamidated)	0	3.089e-16	83.99	5.20727e-08	3	3292.7	1.86644	43.2783	2
YSVLImAEKPVGDLSSPnETK	2	Q9P2B2	M6(Oxidation); N18(Deamidated)	0	4.752e-12	80.92	1.46446e-07	3	2295.14	0.340893	29.2087	0
LEnWTDASRVDGVVLEKVQEDEFR	2	Q9P2B2	N3(Deamidated)	0	1.614e-13	77.76	2.69666e-07	3	2835.38	1.82462	36.2927	2
EAATSLSNPIEIDFQTSGPIFnASVHSDTPSVIR	2	Q9P2B2	N22(Deamidated)	0	3.089e-16	76.52	3.68806e-07	3	3601.77	1.73541	44.0619	0
YIISLDQDSVVKLEnWTDASR	2	Q9P2B2	N15(Deamidated)	0	7.968e-13	73.16	9.39549e-07	2	2453.22	-0.807268	42.4532	1
AAVPKnVSVAEGK	2	Q9P2B2	N6(Deamidated)	0	1.056e-10	72.56	5.87903e-07	2	1270.7	1.269	15.927	1
ELDLTcnITTDR	1	Q9P2B2	C6(Carbamidomethyl); N7(Deamidated)	0	1.096e-07	63.36	4.29025e-06	2	1451.67	0.217267	30.9548	0
YSVLIMAEKPVGDLSSPnETKYIISLDQDSVVK	2	Q9P2B2	N18(Deamidated)	0	9.441e-11	62.82	6.63443e-06	3	3639.87	0.208873	41.0559	1
LEnWTDASRVDGVVLEK	1	Q9P2B2	N3(Deamidated)	0	8.3e-10	58.72	2.34984e-05	2	1931.97	0.883319	31.5794	1
QRnnSWVK	1	Q9P2B2	N3(Deamidated); N4(Deamidated)	0	0.0005595	54.37	5.81296e-05	2	1033.51	0.0966464	9.70324	1
EAATSLSNPIEIDFQTSGPIFnASVHSDTPSVIRGDLIK	1	Q9P2B2	N22(Deamidated)	0	1.809e-11	51.85	7.87022e-05	4	4128.08	1.28752	43.3621	1
LEnWTDASR	1	Q9P2B2	N3(Deamidated)	0	0.00176	36	0.00187136	2	1092.5	0.20129	21.6662	0
QRnNSWVK	1	Q9P2B2	N3(Deamidated)	0	0.003168	31.43	0.013058	2	1032.52	0.103722	9.19876	1
YSVLIMAEKPVGDLSSPnETKYIISLDQDSVVKLEnWTDASR	1	Q9P2B2	N18(Deamidated); N36(Deamidated)	0	9.626e-09	29.2	0.012203	4	4713.37	3.50114	45.246	2
VAEAVSSPAGVGVTWLEPDYQVYLnASKVPGFADDPTELAcR	1	Q9P2B2	N25(Deamidated); C41(Carbamidomethyl)	0	4.264e-09	24.02	0.0509217	3	4480.16	-0.388339	49.7233	1
AAVPKnVSVAEGKELDLTcnITTDR	1	Q9P2B2	N6(Deamidated); C19(Carbamidomethyl); N20(Deamidated)	0	2.431e-06	18.28	0.281585	3	2703.35	1.53299	28.8117	2
ELDLTcnITTDRADDVRPEVTWSFSR	1	Q9P2B2	C6(Carbamidomethyl); N7(Deamidated)	0	1.772e-07	16.88	0.282035	3	3097.45	0.538465	37.1627	1
nVSVAEGK	1	Q9P2B2	N1(Deamidated)	0.001	0.04733	30.34	0.0157661	2	804.41	-0.202344	10.9197	0
nNSWVK	1	Q9P2B2	N1(Deamidated)	0.007	0.2314	23.54	0.0584217	2	748.363	0.430583	16.7688	0
DASSFLAEWQnITKGFSEDR	2	P08195	N11(Deamidated)	0	1.397e-11	103.21	6.23176e-10	2	2302.07	1.89425	48.809	1
LLIAGTnSSDLQQILSLLESNK	1	P08195	N7(Deamidated)	0	8.084e-10	100.55	8.19375e-10	3	2358.28	0.437015	54.3578	0
DIENLKDASSFLAEWQnITKGFSEDR	2	P08195	N17(Deamidated)	0	3.089e-16	99.83	1.83026e-09	3	3014.45	2.52201	48.3089	2
DIENLKDASSFLAEWQnITK	6	P08195	N17(Deamidated)	0	1.811e-10	95.81	4.84168e-09	3	2323.14	-0.174628	46.4926	1
DASSFLAEWQnITK	2	P08195	N11(Deamidated)	0	6.854e-11	92.45	7.30976e-09	2	1610.77	0.880611	46.7703	0
SLVTQYLnATGnR	2	P08195	N8(Deamidated); N12(Deamidated)	0	1.488e-08	85.59	4.00284e-08	2	1438.72	0.197117	33.2749	0
SLVTQYLnATGNR	2	P08195	N8(Deamidated)	0	9.445e-08	74.73	4.74481e-07	2	1437.73	0.117363	31.3792	0
GFSEDRLLIAGTnSSDLQQILSLLESNK	1	P08195	N13(Deamidated)	0	2.702e-10	73.16	6.5696e-07	3	3049.57	0.98252	52.6132	1
LLIAGTnSSDLQQILSLLESnKDLLLTSSYLSDSGSTGEHTK	1	P08195	N7(Deamidated); N21(Deamidated)	0	0.002046	18.63	0.105558	4	4451.29	7.24368	59.2346	1
NRVPDSccInVTVGcGINFNEK	21	P08962	C7(Carbamidomethyl); C8(Carbamidomethyl); N10(Deamidated); C15(Carbamidomethyl)	0	8.565e-10	106.22	2.02964e-10	3	2554.15	-0.505226	34.1785	1
QQmENYPKNnHTASILDR	6	P08962	M3(Oxidation); N10(Deamidated)	0	7.056e-08	91.56	8.51844e-09	2	2176.01	2.35813	16.8939	1
QQMENYPKnnHTASILDR	7	P08962	N9(Deamidated); N10(Deamidated)	0	1.385e-05	85.67	3.57745e-08	4	2161	0.00565046	21.0888	1
ccGAAnYTDWEK	2	P08962	C1(Carbamidomethyl); C2(Carbamidomethyl); N6(Deamidated)	0	2.388e-07	83.04	4.95416e-09	2	1475.56	1.43547	23.6306	0
QQMENYPKNnHTASILDR	5	P08962	N10(Deamidated)	0	8.978e-10	80.84	1.24445e-07	2	2160.02	2.39501	18.7991	1
ccGAAnYTDWEKIPSMSK	3	P08962	C1(Carbamidomethyl); C2(Carbamidomethyl); N6(Deamidated)	0	2.091e-10	77.97	5.02702e-08	2	2118.9	1.89011	29.8435	1
NnHTASILDRMQADFK	4	P08962	N2(Deamidated)	0	1.079e-07	69.5	1.57083e-06	2	1861.89	1.61151	26.981	1
ccGAAnYTDWEKIPSmSK	3	P08962	C1(Carbamidomethyl); C2(Carbamidomethyl); N6(Deamidated); M16(Oxidation)	0	1.667e-13	61.84	2.1603e-06	3	2134.89	1.56411	26.4881	1
QQmENYPKnnHTASILDR	2	P08962	M3(Oxidation); N9(Deamidated); N10(Deamidated)	0	8.969e-09	59.36	1.2283e-05	3	2177	1.11397	19.8815	1
nnHTASILDR	4	P08962	N1(Deamidated); N2(Deamidated)	0	4.17e-05	56.38	2.05979e-05	2	1142.54	0.377825	20.3252	0
NnHTASILDR	5	P08962	N2(Deamidated)	0	1.867e-07	54.23	4.04002e-05	2	1141.56	-0.470996	15.324	0
VPDSccInVTVGcGINFNEK	1	P08962	C5(Carbamidomethyl); C6(Carbamidomethyl); N8(Deamidated); C13(Carbamidomethyl)	0	8.471e-10	31.75	0.00417715	2	2284.01	1.74215	35.5516	0
TLAGEnQTAFEIEELNR	2	P11047	N6(Deamidated)	0	6.754e-09	119.01	2.04105e-11	2	1935.93	1.56277	34.3853	0
TAnDTSTEAYNLLLR	2	P11047	N3(Deamidated)	0	3.129e-06	107.26	2.53708e-10	3	1682.82	0.681992	36.0232	0
IASAVQKnATSTK	2	P11047	N8(Deamidated)	0	6.439e-11	100.8	1.35162e-09	2	1319.72	2.05239	8.96975	1
VAAAnVSVTQPESTGDPNnMTLLAEEAR	3	P11047	N5(Deamidated); N19(Deamidated)	0	1.305e-13	100.28	1.32665e-09	3	2887.36	-1.23237	37.2208	0
AKVAAAnVSVTQPESTGDPNnMTLLAEEAR	1	P11047	N7(Deamidated); N21(Deamidated)	0	2.197e-15	99.08	1.86628e-09	3	3086.5	3.13507	32.0553	1
KIPAInQTITEANEK	2	P11047	N6(Deamidated)	0	2.774e-09	96.67	3.17535e-09	2	1670.9	0.381079	22.6839	1
TLAGEnQTAFEIEELNRK	1	P11047	N6(Deamidated)	0	7.635e-08	84.54	6.38082e-08	3	2064.03	0.542911	28.8686	1
VNDnKTAAEEALR	2	P11047	N4(Deamidated)	0	4.663e-07	82.86	7.78998e-08	2	1431.71	0.652593	15.9836	1
KYEQAKnISQDLEK	3	P11047	N7(Deamidated)	0	1.778e-09	81.75	1.09943e-07	2	1694.87	3.91844	16.4651	2
VnNTLSSQISR	1	P11047	N2(Deamidated)	0	0.0003094	81.08	1.3803e-07	2	1219.63	0.488835	20.13	0
VAAAnVSVTQPESTGDPNnMTLLAEEARK	1	P11047	N5(Deamidated); N19(Deamidated)	0	1.29e-12	72.08	1.06234e-06	3	3015.47	2.50403	31.8711	1
RVNDnKTAAEEALR	2	P11047	N5(Deamidated)	0	1.045e-08	71.97	1.13089e-06	2	1587.81	1.40528	13.8635	2
IASAVQKnATSTKAEAER	3	P11047	N8(Deamidated)	0	1.094e-10	70.32	1.69536e-06	3	1875.98	0.329972	10.5322	2
QVLSYGQnLSFSFR	1	P11047	N8(Deamidated)	0	3.107e-06	69.33	2.00108e-06	2	1646.82	0.717592	37.3341	0
KIPAInQTITEANEKTR	1	P11047	N6(Deamidated)	0	1.343e-13	65.06	3.47756e-06	3	1928.05	1.36987	20.9715	2
nATSTKAEAER	2	P11047	N1(Deamidated)	0	3.373e-06	56.81	2.77237e-05	2	1178.56	-0.277097	4.97141	1
YEQAKnISQDLEK	1	P11047	N6(Deamidated)	0	1e-06	54.89	5.01105e-05	3	1566.77	0.684779	19.0345	1
IPAInQTITEANEK	1	P11047	N5(Deamidated)	0	7.213e-11	54.13	5.35118e-05	2	1542.8	0.649631	27.3415	0
LLnnLTSIK	2	P11047	N3(Deamidated); N4(Deamidated)	0	0.0001769	52.43	5.34333e-05	2	1017.58	0.535796	31.8376	0
LLNnLTSIK	1	P11047	N4(Deamidated)	0	0.004341	49.12	0.000104092	2	1016.6	0.243215	28.5414	0
RVnDnKTAAEEALR	1	P11047	N3(Deamidated); N5(Deamidated)	0	3.969e-07	26.86	0.0384307	3	1588.79	0.776749	15.6834	2
nISQDLEK	1	P11047	N1(Deamidated)	0.001	0.02108	27.81	0.021939	2	947.468	0.26599	21.1239	0
VQGnSTLLHITDLQAR	2	O75054	N4(Deamidated)	0	6.718e-09	109.19	1.6991e-10	2	1766.94	-0.405746	29.9672	0
TLTLVENKPIQLncSVK	1	O75054	N13(Deamidated); C14(Carbamidomethyl)	0	3.488e-16	98.05	1.64509e-09	2	1958.06	0.633862	28.3253	0
LSQAQGnLSVLETR	2	O75054	N7(Deamidated)	0	1.521e-08	92.45	1.12348e-08	2	1516.8	0.355644	27.7331	0
AEDTAGQTALTVMRPDASLQVDTVVPnATVSEK	1	O75054	N27(Deamidated)	0	4.492e-11	75.93	4.04603e-07	3	3415.7	1.64899	38.1187	0
RAEDTAGQTALTVMRPDASLQVDTVVPnATVSEK	2	O75054	N28(Deamidated)	0	3.267e-16	67.69	2.48515e-06	4	3571.8	1.81666	34.2222	1
LTVLQASPQDTGnYScHVEEWLPSPQK	1	O75054	N13(Deamidated); C16(Carbamidomethyl)	0	4.519e-09	34.07	0.00632663	3	3085.46	1.62118	36.269	0
LTVLQASPQDTGnYScHVEEWLPSPQKEWYR	2	O75054	N13(Deamidated); C16(Carbamidomethyl)	0	7.739e-16	32.72	0.00652169	3	3719.74	0.299159	36.97	1
KNYnNTWTR	3	O75054	N4(Deamidated)	0	0.005548	25.15	0.0319239	2	1197.57	0.719841	12.1657	1
SSISVEVASnASVILEGEDLR	1	O75054	N10(Deamidated)	0	1.355e-05	23.98	0.0675907	2	2176.1	-0.723384	55.7006	0
RAEDTAGQTALTVmRPDASLQVDTVVPnATVSEK	1	O75054	M14(Oxidation); N28(Deamidated)	0	3.732e-05	12.49	0.873638	4	3587.79	0.844207	31.1632	1
NYnNTWTR	2	O75054	N3(Deamidated)	0.001	0.02706	35.84	0.00136823	2	1069.47	1.03368	17.9313	0
QcnGTSMcWcVNTAGVR	2	P16422	C2(Carbamidomethyl); N3(Deamidated); C8(Carbamidomethyl); C10(Carbamidomethyl)	0	4.43e-10	122.45	5.97296e-13	2	2001.81	1.9639	28.8096	0
FITSILYENNVITIDLVQnSSQK	15	P16422	N19(Deamidated)	0	2.16e-08	101.73	9.4e-10	3	2640.38	0.28757	50.1045	0
AEMnGSKLGR	2	P16422	N4(Deamidated)	0	0.0001922	54.46	4.94173e-05	2	1063.52	0.0488005	10.0469	1
FITSILYEnNVITIDLVQnSSQKTQnDVDIADVAYYFEKDVK	2	P16422	N9(Deamidated); N19(Deamidated); N26(Deamidated)	0	6.517e-06	16.74	0.22031	4	4856.42	4.77494	52.5133	2
AEMnGSK	1	P16422	N4(Deamidated)	0.001	0.04078	43.53	0.000201842	2	737.314	0.146337	2.22142	0
FITSILYEnNVITIDLVQnSSQK	2	P16422	N9(Deamidated); N19(Deamidated)	0.002	0.06338	23.11	0.0637691	2	2641.39	9.55583	57.5017	0
RAnTSALAVPSPVSNSASAR	2	P55268	N3(Deamidated)	0	8.869e-09	82.26	1.01327e-07	2	1957.01	1.67184	22.7795	1
AQAALDKAnASR	2	P55268	N9(Deamidated)	0	9.884e-09	68.92	2.30178e-06	2	1216.63	1.39816	8.95105	1
cAPNFWnLTSGHGcQPcAcHPSR	2	P55268	C1(Carbamidomethyl); N7(Deamidated); C14(Carbamidomethyl); C17(Carbamidomethyl); C19(Carbamidomethyl)	0	3.22e-11	63.81	4.99093e-07	3	2715.11	0.409576	24.9997	0
AnTSALAVPSPVSNSASAR	2	P55268	N2(Deamidated)	0	4.878e-06	60.85	1.17581e-05	3	1800.91	-0.198762	27.8333	0
DRLALnLTLR	2	P55268	N6(Deamidated)	0	0.001609	56.32	2.66014e-05	3	1185.69	-0.708275	30.9589	1
nTSAASTAQLVEATEELRR	2	P55268	N1(Deamidated)	0	4.951e-06	55.83	4.38843e-05	3	2048.03	0.506412	31.5961	1
LALnLTLR	1	P55268	N4(Deamidated)	0.001	0.01973	56.17	1.40097e-05	2	914.567	0.55124	33.7272	0
FDVnTSAVQVLIEHIGNLDR	1	Q00610	N4(Deamidated)	0	0.005646	14.38	0.547131	2	2241.17	9.95021	47.2584	0
IISAnGcKVDNSSLTGESEPQTR	3	P05023	N5(Deamidated); C7(Carbamidomethyl)	0	2.415e-10	79.53	1.62687e-07	3	2464.17	1.56541	21.6497	1
cVEESGSAHcVcPMLTcPEAnATK	1	O00468	C1(Carbamidomethyl); C10(Carbamidomethyl); C12(Carbamidomethyl); C17(Carbamidomethyl); N21(Deamidated)	0	4.752e-16	82.89	7.71065e-09	3	2709.11	1.24917	24.1554	0
cVEESGSAHcVcPMLTcPEAnATKVcGSDGVTYGNEcQLK	1	O00468	C1(Carbamidomethyl); C10(Carbamidomethyl); C12(Carbamidomethyl); C17(Carbamidomethyl); N21(Deamidated); C26(Carbamidomethyl); C37(Carbamidomethyl)	0	6.747e-15	58.82	2.42757e-06	4	4476.87	0.968431	28.5483	1
GPTFAPLPPVAPLHcAQTPYGccQDnITAAR	1	O00468	C15(Carbamidomethyl); C22(Carbamidomethyl); C23(Carbamidomethyl); N26(Deamidated)	0	1.457e-15	58.65	1.80807e-05	3	3381.59	1.20804	35.8493	0
IFFVNPAPPYLWPAHKNELMLnSSLMR	2	O00468	N22(Deamidated)	0	2.67e-12	49.1	0.000188846	3	3186.63	1.04965	42.9655	1
NELMLnSSLMR	1	O00468	N6(Deamidated)	0	0.0001824	47.51	0.000222661	2	1308.63	0.188402	32.9056	0
nELMLnSSLMR	1	O00468	N1(Deamidated); N6(Deamidated)	0	0.0003186	41.49	0.000769892	2	1309.61	-0.376511	41.442	0
NELmLnSSLMR	1	O00468	M4(Oxidation); N6(Deamidated)	0	0.0001722	33.27	0.00560463	2	1324.63	1.076	30.3598	0
KDTcTQEcSYFnITK	1	P05556	C4(Carbamidomethyl); C8(Carbamidomethyl); N12(Deamidated)	0	6.271e-13	120.23	3.79367e-12	2	1895.82	1.45126	22.8962	1
NPcTSEQncTSPFSYK	1	P05556	C3(Carbamidomethyl); N8(Deamidated); C9(Carbamidomethyl)	0	4.879e-14	117.06	1.96789e-12	2	1920.77	0.289655	22.9716	0
DTcTQEcSYFnITKVESR	2	P05556	C3(Carbamidomethyl); C7(Carbamidomethyl); N11(Deamidated)	0	1.842e-09	102.76	2.43645e-10	2	2238.97	1.70609	30.706	1
KEnSSEIcSNNGEcVcGQcVcR	1	P05556	N3(Deamidated); C8(Carbamidomethyl); C14(Carbamidomethyl); C16(Carbamidomethyl); C19(Carbamidomethyl); C21(Carbamidomethyl)	0	8.622e-14	102.65	5.41963e-11	3	2648.03	1.8258	17.7627	1
LRNPcTSEQncTSPFSYK	2	P05556	C5(Carbamidomethyl); N10(Deamidated); C11(Carbamidomethyl)	0	5.51e-10	102.13	4.04151e-10	3	2189.96	0.773186	21.3789	1
KEnSSEIcSNnGEcVcGQcVcR	2	P05556	N3(Deamidated); C8(Carbamidomethyl); N11(Deamidated); C14(Carbamidomethyl); C16(Carbamidomethyl); C19(Carbamidomethyl); C21(Carbamidomethyl)	0	3.089e-16	99.51	1.11679e-10	3	2649.01	0.785572	19.3134	1
ScGEcIQAGPNcGWcTnSTFLQEGMPTSAR	1	P05556	C2(Carbamidomethyl); C5(Carbamidomethyl); C12(Carbamidomethyl); C15(Carbamidomethyl); N17(Deamidated)	0	6.513e-09	96.81	3.23096e-10	3	3377.38	2.23788	37.2853	0
KDTcTQEcSYFnITKVESR	2	P05556	C4(Carbamidomethyl); C8(Carbamidomethyl); N12(Deamidated)	0	6.123e-14	92.95	3.85313e-09	3	2367.06	0.96375	24.3309	2
cHEGnGTFEcGAcR	2	P05556	C1(Carbamidomethyl); N5(Deamidated); C10(Carbamidomethyl); C13(Carbamidomethyl)	0	6.313e-13	79.4	1.14543e-08	2	1655.6	2.01955	13.2254	0
SYcKnGVnGTGEnGR	1	P05556	C3(Carbamidomethyl); N5(Deamidated); N8(Deamidated); N13(Deamidated)	0	3.965e-07	71.08	2.22252e-07	2	1615.67	1.57271	9.85493	1
nGVnGTGENGR	2	P05556	N1(Deamidated); N4(Deamidated)	0	4.101e-07	66.53	6.00294e-07	2	1076.46	-0.216165	9.18623	0
nGVnGTGEnGR	1	P05556	N1(Deamidated); N4(Deamidated); N9(Deamidated)	0	4.59e-05	64.31	5.56021e-07	2	1077.44	0.457116	10.2196	0
nGVnGTGEnGRK	5	P05556	N1(Deamidated); N4(Deamidated); N9(Deamidated)	0	3.368e-05	40.98	0.000474807	2	1205.54	0.409128	7.44173	1
NKnVTNR	1	P05556	N3(Deamidated)	0	0.001624	29.98	0.0196905	2	846.443	0.384589	0.0282363	1
NGVnGTGENGR	1	P05556	N4(Deamidated)	0	4.851e-06	29.38	0.00409476	2	1075.48	0.0173487	6.0951	0
AQYEDIAnRSR	1	P05787	N8(Deamidated)	0	0.004866	35.02	0.00358843	2	1323.63	0.28761	17.9485	1
HEEGHMLncTcFGQGR	3	P02751	N8(Deamidated); C9(Carbamidomethyl); C11(Carbamidomethyl)	0	6.885e-11	96.71	2.2397e-10	2	1933.78	1.93414	19.0716	0
DQcIVDDITYNVnDTFHK	2	P02751	C3(Carbamidomethyl); N13(Deamidated)	0	5.437e-09	96.46	1.71717e-09	2	2197.97	1.12869	36.8825	0
LDAPTNLQFVnETDSTVLVR	1	P02751	N11(Deamidated)	0	2.929e-09	80.28	1.76262e-07	2	2233.13	0.0205647	41.2578	0
RHEEGHMLncTcFGQGR	3	P02751	N9(Deamidated); C10(Carbamidomethyl); C12(Carbamidomethyl)	0	3.519e-10	61.62	1.7905e-06	2	2089.88	1.53412	16.254	1
RHEEGHmLncTcFGQGR	2	P02751	M7(Oxidation); N9(Deamidated); C10(Carbamidomethyl); C12(Carbamidomethyl)	0	1.473e-12	52.75	1.51302e-05	3	2105.87	0.626664	13.6235	1
GGNSNGALcHFPFLYnNHnYTDcTSEGR	1	P02751	C9(Carbamidomethyl); N16(Deamidated); N19(Deamidated); C23(Carbamidomethyl)	0	4.269e-09	49.14	2.55988e-05	3	3204.32	1.13678	31.77	0
ESKPLTAQQTTKLDAPTNLQFVnETDSTVLVR	1	P02751	N23(Deamidated)	0	1.223e-08	46.63	0.000208579	4	3545.84	1.21042	33.2403	1
LDAPTnLQFVnETDSTVLVR	1	P02751	N6(Deamidated); N11(Deamidated)	0	1.925e-05	43.56	0.000817229	3	2234.14	9.38183	41.4999	0
DQcIVDDITYNVnDTFHKR	2	P02751	C3(Carbamidomethyl); N13(Deamidated)	0	1.866e-06	33.43	0.00456211	4	2354.07	0.34886	32.2836	1
mLnTSSLLEQLNEQFNWVSR	2	P10909	M1(Oxidation); N3(Deamidated)	0	8.641e-10	118.12	2.38193e-11	2	2426.17	1.7382	53.1475	0
MLnTSSLLEQLNEQFNWVSR	2	P10909	N3(Deamidated)	0	5.805e-10	117.77	3.09987e-11	2	2410.18	2.07103	53.9927	0
LAnLTQGEDQYYLR	2	P10909	N3(Deamidated)	0	1.555e-08	115.06	4.08575e-11	2	1684.82	0.0352099	31.0629	0
MLnTSSLLEQLnEQFNWVSR	1	P10909	N3(Deamidated); N12(Deamidated)	0	1.268e-11	84.46	5.55049e-08	2	2411.15	-0.21103	50.9868	0
KEDALnETRESETK	3	P10909	N6(Deamidated)	0	8.058e-09	78.98	1.99828e-07	2	1650.78	1.63203	9.18212	2
LKELPGVcnETMMALWEEcKPcLK	3	P10909	C8(Carbamidomethyl); N9(Deamidated); C19(Carbamidomethyl); C22(Carbamidomethyl)	0	3.089e-16	73.07	7.02773e-07	3	2937.37	0.824447	35.8131	1
KKEDALnETR	3	P10909	N7(Deamidated)	0	4.24e-07	70.88	1.57192e-06	2	1204.62	0.507995	7.06963	2
EDALnETR	1	P10909	N5(Deamidated)	0	0.004724	68.18	1.03397e-06	2	948.427	0.0645455	14.4725	0
EDALnETRESETK	2	P10909	N5(Deamidated)	0	7.237e-07	67.37	1.46585e-06	2	1522.69	0.486179	14.49	1
KEDALnETR	2	P10909	N6(Deamidated)	0	2.176e-05	61.22	9.4009e-06	2	1076.52	0.567788	8.90975	1
LKELPGVcnETmMALWEEcKPcLK	3	P10909	C8(Carbamidomethyl); N9(Deamidated); M12(Oxidation); C19(Carbamidomethyl); C22(Carbamidomethyl)	0	1.872e-12	50.88	0.000105339	4	2953.37	0.615228	31.6993	1
EIRHnSTGcLR	2	P10909	N5(Deamidated); C9(Carbamidomethyl)	0	8.444e-06	47.54	0.000155935	3	1343.64	-2.80044	8.80819	1
ELPGVcnETMmALWEEcKPcLK	2	P10909	C6(Carbamidomethyl); N7(Deamidated); M11(Oxidation); C17(Carbamidomethyl); C20(Carbamidomethyl)	0	1.911e-09	46.77	0.000119915	3	2712.19	3.15914	37.5667	0
ELPGVcnETMMALWEEcKPcLK	2	P10909	C6(Carbamidomethyl); N7(Deamidated); C17(Carbamidomethyl); C20(Carbamidomethyl)	0	2.522e-13	41.82	0.000407748	3	2696.19	1.17871	40.3369	0
HnSTGcLR	2	P10909	N2(Deamidated); C6(Carbamidomethyl)	0	0.004382	21.58	0.0281485	2	945.421	0.366828	5.30729	0
EPGSnVTMSVDAEcVPMVR	1	Q08380	N5(Deamidated); C14(Carbamidomethyl)	0	3.089e-16	115.47	1.70275e-11	2	2078.92	1.04526	34.506	0
YKGLnLTEDTYKPR	3	Q08380	N5(Deamidated)	0	3.705e-13	102.97	8.37738e-10	2	1698.87	1.30589	21.0623	1
ALGFEnATQALGR	2	Q08380	N6(Deamidated)	0	6.102e-10	91.42	1.40977e-08	2	1348.69	1.51434	31.8866	0
AAIPSALDTnSSK	1	Q08380	N10(Deamidated)	0	0.0001097	79.92	1.73161e-07	2	1275.64	0.765932	22.8838	0
TVIRPFYLTnSSGVD	3	Q08380	N10(Deamidated)	0	8.938e-08	74.68	5.838e-07	2	1669.84	0.627951	35.2964	0
ALMLcEGLFVADVTDFEGWKAAIPSALDTnSSK	1	Q08380	C5(Carbamidomethyl); N30(Deamidated)	0	1.871e-11	74.44	5.54014e-07	3	3557.73	3.17673	53.1639	1
GLnLTEDTYKPR	2	Q08380	N3(Deamidated)	0	1.755e-06	72.54	8.49708e-07	2	1407.71	0.336973	22.3133	0
IRFPMMLPEELFELQFnLSLYWSHEALFQK	2	Q08380	N17(Deamidated)	0	7.275e-15	71.19	1.02264e-06	3	3757.88	1.13125	54.6023	1
DAGVVcTnETR	1	Q08380	C6(Carbamidomethyl); N8(Deamidated)	0	0.0003627	55.99	1.43508e-05	2	1222.54	0.908083	17.0722	0
FPMMLPEELFELQFnLSLYWSHEALFQKK	1	Q08380	N15(Deamidated)	0	2.786e-11	49.98	0.000154209	4	3616.79	0.0100248	54.2379	1
HERDAGVVcTnETR	2	Q08380	C9(Carbamidomethyl); N11(Deamidated)	0	2.276e-09	48.73	9.31075e-05	3	1644.74	0.11425	9.15858	1
IRFPMMLPEELFELQFnLSLYWSHEALFQKK	1	Q08380	N17(Deamidated)	0	1.937e-15	47.48	0.000211699	4	3885.98	1.42051	53.4084	2
KQNNGAFnETLFR	2	P02786	N8(Deamidated)	0	1.491e-09	93.31	6.2299e-09	2	1539.76	0.842961	23.4746	1
DFEDLYTPVnGSIVIVR	2	P02786	N10(Deamidated)	0	3.669e-08	92.75	8.83923e-09	2	1937.98	-0.590666	48.3818	0
KQNnGAFnETLFR	3	P02786	N4(Deamidated); N8(Deamidated)	0	1.198e-07	89.94	1.54115e-08	2	1540.74	-0.112998	26.5111	1
KDFEDLYTPVnGSIVIVR	2	P02786	N11(Deamidated)	0	1.3e-08	88.64	1.95585e-08	3	2066.08	0.296491	38.1159	1
LNLSEnYTLSISNAR	1	Q13740	N6(Deamidated)	0	2.555e-11	101.71	1.18042e-09	2	1695.86	1.2524	33.1507	0
TVNSLnVSAISIPEHDEADEISDENR	1	Q13740	N6(Deamidated)	0	2.77e-12	98.71	1.70251e-09	3	2855.32	-0.560359	33.6437	0
IIISPEEnVTLTcTAENQLER	3	Q13740	N8(Deamidated); C13(Carbamidomethyl)	0	1.409e-13	85.73	5.09208e-08	2	2431.21	1.70497	37.3508	0
LGDcISEDSYPDGnITWYR	1	Q13740	C4(Carbamidomethyl); N14(Deamidated)	0	1.965e-12	81.79	3.07931e-08	2	2261.97	1.83153	37.5331	0
KLGDcISEDSYPDGnITWYR	2	Q13740	C5(Carbamidomethyl); N15(Deamidated)	0	1.588e-11	77.71	1.33853e-07	2	2390.07	3.87876	32.6857	1
EGDnITLK	1	Q13740	N4(Deamidated)	0	0.00583	72.61	7.29208e-07	2	890.447	-0.0185279	18.8232	0
NAIKEGDnITLK	2	Q13740	N8(Deamidated)	0	0.0004287	69.19	2.13291e-06	3	1316.71	0.583084	18.2774	1
nATVVWMKDNIR	2	Q13740	N1(Deamidated)	0	3.805e-05	57.13	3.44683e-05	2	1447.74	0.819939	27.5539	1
TIIcHVEGFPKPAIQWTITGSGSVInQTEESPYInGR	1	Q13740	C4(Carbamidomethyl); N26(Deamidated); N35(Deamidated)	0	3.384e-10	55.84	3.53134e-05	4	4102.04	5.07369	39.5439	0
nATGDYK	1	Q13740	N1(Deamidated)	0	0.008	44.66	0.000109433	2	769.336	0.070203	6.86143	0
nAIKEGDnITLK	1	Q13740	N1(Deamidated); N8(Deamidated)	0	1.821e-07	43.74	0.00076503	2	1317.69	0.865299	23.0316	1
nATVVWMK	1	Q13740	N1(Deamidated)	0	0.0121	42.62	0.000981894	2	949.481	-0.609682	29.2149	0
RnATGDYK	1	Q13740	N2(Deamidated)	0	0.0001994	42.56	0.00045202	2	925.438	0.20675	4.16899	1
DRLnLSENYTLSISNAR	2	Q13740	N4(Deamidated)	0	1.802e-05	40.6	0.00138919	3	1966.98	0.970571	31.2331	1
LGDcISEDSYPDGnITWYRnGK	1	Q13740	C4(Carbamidomethyl); N14(Deamidated); N20(Deamidated)	0	1.957e-13	39.99	0.000506164	3	2562.11	1.3917	32.6796	1
SVQYDDVPEYKDRLNLSEnYTLSISNAR	2	Q13740	N19(Deamidated)	0	6.241e-05	25.4	0.0448467	3	3290.59	2.71252	32.4279	2
TVNSLnVSAISIPEHDEADEISDENREK	2	Q13740	N6(Deamidated)	0	5.699e-11	24.09	0.054007	4	3112.46	1.26716	29.9717	1
InTTADEKDPTNPFR	2	O14672	N2(Deamidated)	0	5.936e-10	104.49	4.64099e-10	2	1719.82	1.65096	22.489	1
EGIcNGFTALcPASDPKPnFTDcNR	1	O14672	C4(Carbamidomethyl); C11(Carbamidomethyl); N19(Deamidated); C23(Carbamidomethyl)	0	2.362e-11	68.76	5.38834e-07	3	2842.23	1.30899	32.701	0
EGIcnGFTALcPASDPKPnFTDcNR	3	O14672	C4(Carbamidomethyl); N5(Deamidated); C11(Carbamidomethyl); N19(Deamidated); C23(Carbamidomethyl)	0	2.191e-11	65.6	7.57413e-07	3	2843.21	1.43481	34.6789	0
InTTADEKDPTNPFRFPNIGVEK	3	O14672	N2(Deamidated)	0	3.551e-08	61.17	1.33671e-05	3	2604.3	1.22455	31.6	2
IRInTTADEKDPTNPFR	2	O14672	N4(Deamidated)	0	1.281e-06	59.33	2.26361e-05	4	1989	0.0591178	23.5074	2
nISQVLEKK	2	O14672	N1(Deamidated)	0	0.001491	44.28	0.000475894	2	1059.61	0.846521	20.6915	1
nISQVLEK	1	O14672	N1(Deamidated)	0	0.007999	36.25	0.00391277	2	931.51	0.241424	26.1895	0
nISFMVK	1	O14672	N1(Deamidated)	0.002	0.06159	32.05	0.00464682	2	839.434	0.674406	30.8572	0
GcSSSTSVLLTLDNNVVnGSSPAIR	1	P07996	C2(Carbamidomethyl); N18(Deamidated)	0	5.806e-09	113.46	8.24995e-11	2	2549.27	5.5495	38.7915	0
NKGcSSSTSVLLTLDNNVVnGSSPAIR	1	P07996	C4(Carbamidomethyl); N20(Deamidated)	0	7.414e-11	94.25	6.74628e-09	3	2791.4	3.48126	32.5878	1
VVnSTTGPGEHLR	2	P07996	N3(Deamidated)	0	1.687e-05	83.37	6.32853e-08	3	1367.69	0.0095799	14.3494	0
VScPIMPcSnATVPDGEccPR	2	P07996	C3(Carbamidomethyl); C8(Carbamidomethyl); N10(Deamidated); C18(Carbamidomethyl); C19(Carbamidomethyl)	0	5.641e-11	64.12	6.19612e-07	2	2407.99	2.58093	29.0736	0
KVScPIMPcSnATVPDGEccPR	2	P07996	C4(Carbamidomethyl); C9(Carbamidomethyl); N11(Deamidated); C19(Carbamidomethyl); C20(Carbamidomethyl)	0	1.906e-13	50.13	3.15416e-05	3	2536.08	0.303608	24.23	1
NKGcSSSTSVLLTLDnNVVnGSSPAIR	2	P07996	C4(Carbamidomethyl); N16(Deamidated); N20(Deamidated)	0	1.57e-05	42.14	0.00115774	3	2792.37	0.592237	33.3929	1
HNDPFAPGGTVVAASDSATDPFASVFGnESFGGGFADFSTLSK	1	P42566	N28(Deamidated)	0	9.021e-06	23.88	0.0386751	3	4279.97	8.03026	52.2248	0
VNncSDMcFHQK	2	Q92626	N3(Deamidated); C4(Carbamidomethyl); C8(Carbamidomethyl)	0	9.955e-09	74.75	3.34172e-08	2	1540.6	2.46968	14.7275	0
ILcDNADnITR	1	Q92626	C3(Carbamidomethyl); N8(Deamidated)	0	1.283e-06	67.42	1.67549e-06	2	1305.61	0.839832	22.257	0
VYcnLSAAHTFEDLK	1	Q92626	C3(Carbamidomethyl); N4(Deamidated)	0	8.59e-08	61.81	7.84417e-06	3	1768.82	0.114152	28.0807	0
RVNncSDMcFHQK	3	Q92626	N4(Deamidated); C5(Carbamidomethyl); C9(Carbamidomethyl)	0	6.881e-10	41.72	0.000141325	3	1696.7	1.23629	10.4971	1
GVLMVGnETTYEDGHGSR	3	Q8IWA5	N7(Deamidated)	0	9.299e-14	99.3	8.75299e-10	2	1922.86	0.98386	23.5013	0
GVLmVGnETTYEDGHGSR	1	Q8IWA5	M4(Oxidation); N7(Deamidated)	0	2.463e-11	90.07	5.70726e-09	3	1938.85	1.35641	21.5403	0
KnITDLVEGAK	2	Q8IWA5	N2(Deamidated)	0	6.134e-06	89.51	2.15492e-08	2	1188.65	0.748344	23.5203	1
KnITDLVEGAKK	1	Q8IWA5	N2(Deamidated)	0	3.701e-07	83.74	5.19882e-08	2	1316.74	0.212547	19.5477	2
GVLMVGnETTYEDGHGSRK	3	Q8IWA5	N7(Deamidated)	0	4.634e-13	69.52	1.32348e-06	2	2050.95	1.93457	20.0622	1
TcNPETFPSSnESR	2	Q8IWA5	C2(Carbamidomethyl); N11(Deamidated)	0	5.917e-07	61.49	1.52559e-06	2	1626.67	0.744433	19.3154	0
nITDLVEGAK	1	Q8IWA5	N1(Deamidated)	0	0.004989	54.31	7.87697e-05	2	1060.55	0.607866	33.4366	0
GVLMVGnETTYEDGHGSRKnITDLVEGAK	2	Q8IWA5	N7(Deamidated); N20(Deamidated)	0	4.74e-10	53.79	6.8942e-05	3	3092.49	1.22132	29.3446	2
GVLmVGnETTYEDGHGSRKnITDLVEGAK	1	Q8IWA5	M4(Oxidation); N7(Deamidated); N20(Deamidated)	0	1.411e-11	42.24	0.000907494	3	3108.48	1.82986	28.0233	2
nITDLVEGAKK	1	Q8IWA5	N1(Deamidated)	0	0.008758	17.39	0.344716	3	1188.65	0.0438284	26.5612	1
QcnQTSVcWcVNSVGVR	3	P09758	C2(Carbamidomethyl); N3(Deamidated); C8(Carbamidomethyl); C10(Carbamidomethyl)	0	9.701e-14	124.83	1.33185e-12	2	2054.89	1.38265	29.7317	0
QcnQTSVcWcVnSVGVR	1	P09758	C2(Carbamidomethyl); N3(Deamidated); C8(Carbamidomethyl); C10(Carbamidomethyl); N12(Deamidated)	0	8.789e-09	112.21	1.7434e-11	2	2055.87	0.72534	31.3935	0
HRPTAGAFnHSDLDAELR	3	P09758	N9(Deamidated)	0	4.663e-10	72.15	9.69164e-07	2	2007.97	1.7456	19.9553	0
HRPTAGAFnHSDLDAELRR	3	P09758	N9(Deamidated)	0	7.858e-09	40.61	0.00174227	4	2164.06	0.119498	18.3552	1
IISKncTSYGVLDISK	2	P16671	N5(Deamidated); C6(Carbamidomethyl)	0	4.633e-15	97.74	2.32209e-09	2	1798.93	1.42134	26.1619	1
NYIVPILWLnETGTIGDEK	1	P16671	N10(Deamidated)	0	2.402e-06	92.62	1.01745e-08	3	2176.12	1.24624	50.7539	0
QFWIFDVQNPQEVMMnSSNIQVK	5	P16671	N16(Deamidated)	0	3.98e-08	84.29	5.99551e-08	3	2783.31	-0.749052	49.7046	0
ncTSYGVLDISK	1	P16671	N1(Deamidated); C2(Carbamidomethyl)	0	2.492e-05	72.04	4.6888e-07	2	1357.63	0.875124	32.002	0
RNYIVPILWLnETGTIGDEK	2	P16671	N11(Deamidated)	0	8.288e-10	69.44	1.64387e-06	2	2332.22	2.14344	42.7205	1
VFnGKDnISK	2	P16671	N3(Deamidated); N7(Deamidated)	0	4.79e-06	57.04	3.16315e-05	2	1123.56	0.436879	14.9556	1
VFNGKDnISK	2	P16671	N7(Deamidated)	0	7.862e-05	56.6	3.8614e-05	2	1122.58	0.334945	13.0671	1
ELLWGYRDPFLSLVPYPVTTTVGLFYPYnnTADGVYK	1	P16671	N29(Deamidated); N30(Deamidated)	0	1.797e-08	53.86	4.68711e-05	3	4271.15	5.76492	54.6622	1
nLSYWESHcDMInGTDAASFPPFVEK	2	P16671	N1(Deamidated); C9(Carbamidomethyl); N13(Deamidated)	0	1.372e-13	52.37	2.11491e-05	3	3017.3	1.18746	45.007	0
NYIVPILWLnETGTIGDEKANmFR	1	P16671	N10(Deamidated); M22(Oxidation)	0	1.813e-09	42.01	0.0010796	3	2811.41	1.01843	45.1061	1
ELLWGYRDPFLSLVPYPVTTTVGLFYPYnNTADGVYK	2	P16671	N29(Deamidated)	0	7.026e-06	33.27	0.00553398	4	4270.16	3.6065	54.7038	1
nATQHTAGYFGSDVK	2	Q9HCU4	N1(Deamidated)	0	6.96e-14	107.95	1.45094e-10	2	1596.73	1.07164	19.8835	0
GNELSLVLLnASTGELK	2	Q9HCU4	N10(Deamidated)	0	1.947e-13	102.13	8.29735e-10	2	1758.95	0.321162	43.3669	0
FGSVLGnYScAAQGTQGGSKK	2	Q9HCU4	N7(Deamidated); C10(Carbamidomethyl)	0	3.404e-15	91.94	8.22059e-09	2	2117.99	1.31697	22.3952	1
DTDAPGGHILnVSLSVGQPPGPGGGPPFLPSEDLQER	1	Q9HCU4	N11(Deamidated)	0	4.105e-12	90.35	1.51763e-08	3	3708.83	3.31747	46.0699	0
GFDPDcnKTSGEcHcK	2	Q9HCU4	C6(Carbamidomethyl); N7(Deamidated); C13(Carbamidomethyl); C15(Carbamidomethyl)	0	9.951e-12	69.37	1.15337e-07	2	1912.73	1.11654	9.37283	1
LHGLHLSnITVGGIPGPAGGVAR	2	Q9HCU4	N8(Deamidated)	0	5.052e-15	64.14	2.79472e-06	3	2194.21	1.40694	30.748	0
LQRnESGLDSGR	2	Q9HCU4	N4(Deamidated)	0	9.049e-08	50.4	0.000117649	3	1332.65	0.118557	9.72333	1
GWLPPNLFncTSITFSELK	1	Q9HCU4	N9(Deamidated); C10(Carbamidomethyl)	0	0.0005062	36.62	0.00375655	2	2225.1	3.71382	50.2614	0
HIDMADFIANnGTVPGcPAKK	1	Q9HCU4	N11(Deamidated); C17(Carbamidomethyl)	0	9.739e-11	34.09	0.00633656	3	2257.08	1.51856	28.8645	1
VInQTTcENLLPQQITPR	2	Q9Y5Y6	N3(Deamidated); C7(Carbamidomethyl)	0	2.429e-09	117.96	2.48731e-11	2	2126.1	3.10077	32.9855	0
ITNENFVDAYENSnSTEFVSLASK	2	Q9Y5Y6	N14(Deamidated)	0	2.865e-15	114.38	3.97582e-11	2	2680.23	2.264	39.1859	0
SLTQGSLIVGDLAPVnGTSQGK	1	P98160	N16(Deamidated)	0	4.185e-16	78.07	2.25355e-07	2	2143.13	1.64519	37.2496	0
IQGEEIVFHDLnLTAHGISHcPTcR	2	P98160	N12(Deamidated); C21(Carbamidomethyl); C24(Carbamidomethyl)	0	1.33e-15	62.1	1.0328e-05	3	2905.38	1.85527	30.2206	0
SQGLNLHTLLYLGGVEPSVPLSPATnMSAHFR	1	P98160	N26(Deamidated)	0	1.668e-14	59.16	1.77761e-05	4	3407.75	1.59513	42.7774	0
NLHQSnTSRAELLVTEAPSKPITVTVEEQR	1	P98160	N6(Deamidated)	0	3.604e-08	46.2	0.000275866	4	3348.73	-1.64176	26.6507	1
ALVnFTR	1	P98160	N4(Deamidated)	0.004	0.1266	42.06	0.000768541	2	821.452	0.853131	25.5596	0
SYSTTYEERnITGTR	2	Q15758	N10(Deamidated)	0	8.216e-10	45.86	0.000322975	2	1778.82	1.07106	18.4096	1
ITDSEDKALMnGSESR	2	P35613	N11(Deamidated)	0	2.913e-12	135.94	2.49589e-13	2	1753.79	1.92829	18.2845	1
ILLTcSLnDSATEVTGHR	2	P35613	C5(Carbamidomethyl); N8(Deamidated)	0	3.243e-16	132.85	8.89742e-13	2	1987.98	2.69077	28.9785	0
ITDSEDKALmnGSESR	1	P35613	M10(Oxidation); N11(Deamidated)	0	4.005e-10	91.3	7.00538e-09	2	1769.79	0.576642	15.1759	1
ALMnGSESR	1	P35613	N4(Deamidated)	0	5.585e-05	73.49	4.38759e-07	2	965.436	0.557842	14.3962	0
ALmnGSESR	3	P35613	M3(Oxidation); N4(Deamidated)	0	0.00648	39.42	0.000554296	2	981.431	-0.0537064	8.75057	0
LNLQTSTSIPnVTEMK	1	P17301	N11(Deamidated)	0	4.649e-08	86.59	3.81548e-08	2	1776.91	0.461447	33.5791	0
TnMSLGLILTR	1	P17301	N2(Deamidated)	0	6.281e-08	85.24	3.78521e-08	2	1219.67	0.307705	38.6771	0
TAScSnVTcWLK	1	P17301	C4(Carbamidomethyl); N6(Deamidated); C9(Carbamidomethyl)	0	9.774e-06	73.84	2.62285e-07	2	1427.63	2.15643	28.9835	0
AnYTGQIVLYSVNENGnITVIQAHR	1	P17301	N2(Deamidated); N17(Deamidated)	0	2.351e-09	72.71	9.59076e-07	3	2776.4	1.97007	36.946	0
TnmSLGLILTR	1	P17301	N2(Deamidated); M3(Oxidation)	0	2.682e-05	71.6	1.01699e-06	2	1235.67	0.566137	33.5599	0
MPMNAALGEPSKATVSInDSVSDLPK	1	Q5SZK8	N18(Deamidated)	0	8.923e-15	107.38	2.79699e-10	3	2673.32	1.95714	32.9894	1
ADSFnLSLSDMSQEWR	1	Q5SZK8	N5(Deamidated)	0	2.004e-08	93.68	2.50701e-09	2	1886.83	1.46155	42.9005	0
ATVSInDSVSDLPK	1	Q5SZK8	N6(Deamidated)	0	6.69e-10	91.11	1.3708e-08	2	1446.73	1.46903	29.119	0
LVLGTPQSNSPFGAAVGEQnETLIR	2	Q5SZK8	N20(Deamidated)	0	1.522e-10	88.59	2.07535e-08	2	2599.35	4.27508	39.9363	0
FTITQVPIHGHLLFnNTRPVMVFTK	1	Q5SZK8	N15(Deamidated)	0	1.379e-10	56.15	1.85636e-05	3	2911.57	1.16788	35.4756	0
YSDYDKTGSIcASENInDTLTR	1	Q5SZK8	C11(Carbamidomethyl); N17(Deamidated)	0	4.141e-06	27.8	0.0112852	3	2524.12	1.40002	27.0989	1
YYKGSLSYLnVTR	1	P07339	N10(Deamidated)	0	7.348e-08	67.27	2.90624e-06	2	1564.8	1.15571	24.9258	1
GSLSYLnVTR	1	P07339	N7(Deamidated)	0	0.0001777	58.42	1.78411e-05	2	1110.58	0.906151	27.2609	0
GSLSYLnVTRK	2	P07339	N7(Deamidated)	0	0.0001343	53.79	4.65881e-05	2	1238.67	0.320266	21.4394	1
nGTSFDIHYGSGSLSGYLSQDTVSVPcQSASSASALGGVK	1	P07339	N1(Deamidated); C27(Carbamidomethyl)	0	0.0003549	14.56	0.376191	3	3992.85	-0.0398709	40.5062	0
TAVncSSDFDAcLITK	11	P13987	N4(Deamidated); C5(Carbamidomethyl); C12(Carbamidomethyl)	0	2.515e-08	112.92	2.85883e-11	2	1802.8	2.04322	31.8884	0
DVVTAAGDMLKDnATEEEILVYLEK	2	P07602	N13(Deamidated)	0	1.869e-13	88.72	2.2357e-08	3	2767.36	-0.72641	49.774	1
NLEKnSTKQEILAALEK	3	P07602	N5(Deamidated)	0	4.862e-09	86.4	2.26796e-08	2	1930.05	0.951109	25.1709	2
TnSTFVQALVEHVKEEcDR	2	P07602	N2(Deamidated); C17(Carbamidomethyl)	0	9.335e-10	70.19	1.32571e-06	3	2263.07	-0.412569	33.5943	1
TcDWLPKPnMSAScK	2	P07602	C2(Carbamidomethyl); N9(Deamidated); C14(Carbamidomethyl)	0	2.101e-10	65.67	1.51771e-06	2	1795.78	-0.123535	26.3151	0
SLPcDIcKDVVTAAGDMLKDnATEEEILVYLEK	2	P07602	C4(Carbamidomethyl); C7(Carbamidomethyl); N21(Deamidated)	0	8.891e-13	50.81	0.000120328	4	3740.8	0.745114	50.3043	2
TnSTFVQALVEHVK	1	P07602	N2(Deamidated)	0	1.636e-06	50.73	0.000144543	3	1573.82	0.548895	33.17	0
LIDNnKTEKEILDAFDK	2	P07602	N5(Deamidated)	0	2.854e-08	49.12	0.00021492	3	2007.03	0.270736	30.704	2
LIDNnKTEK	2	P07602	N5(Deamidated)	0	0.003592	36.8	0.0038443	3	1075.56	-0.91248	8.44801	1
TnSTFVQALVEHVKEEcDRLGPGMADIcK	2	P07602	N2(Deamidated); C17(Carbamidomethyl); C28(Carbamidomethyl)	0	3.289e-11	33.29	0.00661027	3	3305.57	3.23654	39.2077	2
TAADTTGLQPILNQFTPAnISR	2	P06756	N19(Deamidated)	0	2.39e-12	97.3	3.17486e-09	2	2330.2	1.47143	43.4341	0
LScAFKTEnQTR	2	P06756	C3(Carbamidomethyl); N9(Deamidated)	0	3.124e-08	77.06	2.10564e-07	2	1455.69	1.1132	14.7968	1
AnTTQPGIVEGGQVLK	2	P06756	N2(Deamidated)	0	4.331e-11	66.11	3.02459e-06	2	1612.86	1.44812	26.1562	0
ISSLQTTEKnDTVAGQGERDHLITK	1	P06756	N10(Deamidated)	0	4.215e-06	19.97	0.171682	4	2742.39	0.610897	19.3909	2
ENQnHSYSLK	1	P06756	N4(Deamidated)	0.001	0.01906	47.06	0.000115121	3	1220.56	0.655053	9.80741	0
VVLGAnGTYScLVR	2	Q5ZPR3	N6(Deamidated); C11(Carbamidomethyl)	0	2.306e-07	95.77	4.22436e-09	2	1509.77	0.287327	30.4162	0
TALFPDLLAQGnASLR	2	Q5ZPR3	N12(Deamidated)	0	1.274e-11	86.89	3.02874e-08	3	1687.9	-0.280352	43.4011	0
VIEEFYnQTWVHR	2	P11166	N7(Deamidated)	0	3.836e-10	83.73	7.43493e-08	2	1721.83	1.37453	30.1325	0
DINSQQELQnITTDTR	2	P10586	N10(Deamidated)	0	2.783e-09	103.31	6.39323e-10	2	1876.89	1.10351	30.7826	0
KVEVEPLnSTAVHVYWK	3	P10586	N8(Deamidated)	0	1.21e-14	103	7.24216e-10	3	2000.05	1.87901	28.1197	1
nVSIGIVGKDLEFTIYDDDDVSPFLEGLEERPQR	1	P25786	N1(Deamidated)	0	0.00136	11.33	0.975474	3	3866.93	9.04252	46.3822	1
LDMSQnVSLVTAELSK	2	Q99808	N6(Deamidated)	0	2.783e-15	138.34	2.88713e-13	2	1735.88	1.90802	42.0915	0
LDmSQnVSLVTAELSK	1	Q99808	M3(Oxidation); N6(Deamidated)	0	4.278e-08	101.91	1.10475e-09	2	1751.88	2.21505	35.1661	0
GYYnQSEAGSHTVQR	2	P01892	N4(Deamidated)	0	8.011e-10	97.12	1.0966e-09	2	1697.75	1.41038	14.6088	0
EQInITLDHR	2	Q02809	N4(Deamidated)	0	7.206e-05	56.27	3.29287e-05	3	1239.63	-0.410966	22.4494	0
YIHQnYTK	2	Q02809	N5(Deamidated)	0	0.002343	44.22	0.000348167	2	1067.52	0.0330663	9.00247	0
MDKSDAVSHTGnYTcEVTELTR	2	Q08722	N12(Deamidated); C15(Carbamidomethyl)	0	1.673e-13	95.14	2.26585e-09	3	2515.11	0.848497	24.7826	1
mDKSDAVSHTGnYTcEVTELTR	1	Q08722	M1(Oxidation); N12(Deamidated); C15(Carbamidomethyl)	0	3.089e-16	85.95	1.5754e-08	3	2531.11	2.1046	23.6873	1
SDAVSHTGnYTcEVTELTR	2	Q08722	N9(Deamidated); C12(Carbamidomethyl)	0	8.833e-14	83.66	2.79842e-08	3	2140.95	1.74055	26.1514	0
GRDIYTFDGALnKSTVPTDFSSAK	1	Q08722	N12(Deamidated)	0	8.573e-09	57.95	3.02212e-05	3	2591.26	0.0424868	30.2747	2
DIYTFDGALnKSTVPTDFSSAK	1	Q08722	N10(Deamidated)	0	5.268e-08	41.95	0.00102441	3	2378.14	1.0861	37.2813	1
SDAVSHTGnYTcEVTELTREGETIIELK	1	Q08722	N9(Deamidated); C12(Carbamidomethyl)	0	3.042e-08	38.75	0.00194694	4	3153.49	0.325307	38.4645	1
GnSTHGcSSEETFLIDcR	2	Q03405	N2(Deamidated); C7(Carbamidomethyl); C17(Carbamidomethyl)	0	8.739e-11	82.95	1.11538e-08	2	2070.85	1.2695	24.2329	0
GPMNQcLVATGTHEPKnQSYMVR	2	Q03405	C6(Carbamidomethyl); N17(Deamidated)	0	3.089e-16	58.17	1.78314e-05	3	2619.22	1.50955	21.8465	1
GPmNQcLVATGTHEPKnQSYMVR	1	Q03405	M3(Oxidation); C6(Carbamidomethyl); N17(Deamidated)	0	1.388e-07	13.43	0.460751	4	2635.21	0.437107	20.2093	1
nQSYMVR	1	Q03405	N1(Deamidated)	0.002	0.07144	32.89	0.00282724	2	898.409	0.0475732	17.8409	0
SAEFFnYTVR	1	O60568	N6(Deamidated)	0	9.237e-06	68.68	1.26033e-06	2	1234.57	-0.0139013	31.1146	0
EQYIHEnYSR	2	O60568	N7(Deamidated)	0	4.499e-05	50.44	4.69898e-05	2	1339.59	0.287478	15.696	0
YDTEHLHPDLWQIFDNPVDWKEQYIHEnYSR	1	O60568	N28(Deamidated)	0	1.419e-13	40.75	0.000879258	4	3988.84	4.88239	38.7855	1
LSAVNSIFLSHnNTK	3	P48960	N12(Deamidated)	0	8.97e-09	108.94	2.09974e-10	2	1645.86	0.637388	26.135	0
TFKnESENTcQDVDEcQQNPR	2	P48960	N4(Deamidated); C10(Carbamidomethyl); C16(Carbamidomethyl)	0	3.73e-15	95.35	5.1055e-10	3	2600.07	2.6714	16.4719	1
WcPQNSScVnATAcR	1	P48960	C2(Carbamidomethyl); C8(Carbamidomethyl); N10(Deamidated); C14(Carbamidomethyl)	0	8.105e-08	76.39	3.21461e-08	2	1811.73	2.02596	20.6466	0
GDKnVTMGQSSAR	2	P48960	N4(Deamidated)	0	1.055e-06	59.11	1.06787e-05	2	1351.63	0.177293	8.88017	1
GDKnVTmGQSSAR	1	P48960	N4(Deamidated); M7(Oxidation)	0	0.00107	25.01	0.0236625	2	1367.62	1.30489	4.72467	1
VLSLPLnSSAVVncSVHGLPTPALR	4	P50895	N7(Deamidated); N13(Deamidated); C14(Carbamidomethyl)	0	3.898e-10	66.87	2.06617e-06	2	2603.39	1.97347	41.0662	0
TQnFTLLVQGSPELK	2	P50895	N3(Deamidated)	0	4.188e-07	65.92	3.9786e-06	2	1675.9	3.12432	36.7504	0
DIVGnLTELESEDIQIEALLMR	2	Q92896	N5(Deamidated)	0	5.214e-15	85.01	6.13648e-08	2	2502.27	1.54294	56.4552	0
GnITEYQcHQYITK	2	Q92896	N2(Deamidated); C8(Carbamidomethyl)	0	2.003e-07	76.5	1.76859e-07	2	1755.8	1.95548	20.307	0
GYMVScLVDHRGnITEYQcHQYITK	1	Q92896	C6(Carbamidomethyl); N13(Deamidated); C19(Carbamidomethyl)	0	1.452e-08	30.51	0.00849187	4	3073.4	2.40648	26.6273	1
DMVTYFMnLSQANAQGTPR	3	Q92485	N8(Deamidated)	0	1.163e-11	95.11	3.08319e-09	3	2144.97	0.30642	48.3622	0
ATLSLKDMVTYFMnLSQANAQGTPR	2	Q92485	N14(Deamidated)	0	5.385e-05	32.1	0.0116536	4	2758.35	0.0577817	52.1234	1
NQFPAGSNNIYNQIAELWKPWLSnESIALFK	1	Q92485	N24(Deamidated)	0	7.623e-11	28.34	0.0197849	3	3593.82	3.80549	53.746	0
VLHnGTLAELQGLPHIR	3	Q13641	N4(Deamidated)	0	1.601e-14	89.7	8.08997e-09	3	1869.04	0.699975	28.6414	0
HLDLSnNSLVSLTYVSFR	1	Q13641	N6(Deamidated)	0	1.118e-11	78.96	2.20445e-07	3	2066.06	0.785386	41.8302	0
nLTHLESLHLEDNALK	3	Q13641	N1(Deamidated)	0	2.132e-09	74.65	6.52973e-07	2	1847.95	1.54063	30.2021	0
nLTEVPTDLPAYVR	1	Q13641	N1(Deamidated)	0	8.325e-06	67.84	3.07498e-06	2	1588.82	0.260478	39.6558	0
RPPLAELAALnLSGSR	2	Q13641	N11(Deamidated)	0	1.17e-10	59.91	8.72903e-06	2	1665.93	1.05887	33.0667	0
RPPLAELAALnLSGSRLDEVR	2	Q13641	N11(Deamidated)	0	7.1e-12	54.78	1.99596e-05	3	2278.25	0.563342	34.0225	1
cVNRnLTEVPTDLPAYVR	4	Q13641	C1(Carbamidomethyl); N5(Deamidated)	0	3.035e-09	32.75	0.00992754	3	2118.07	2.54209	31.2228	1
GcFDGnVTLTAAnVTVSLPVR	1	O95274	C2(Carbamidomethyl); N6(Deamidated); N13(Deamidated)	0	1.01e-10	113.21	8.16575e-11	2	2193.09	1.79195	44.3495	0
EAcQGTSPPVVScYnASDHVYK	2	O95274	C3(Carbamidomethyl); C13(Carbamidomethyl); N15(Deamidated)	0	5.389e-12	68.79	6.87074e-07	3	2470.07	0.548191	23.6487	0
ALDPAGnESAYPPNGVEcYScVGLSR	1	O95274	N7(Deamidated); C18(Carbamidomethyl); C21(Carbamidomethyl)	0	8.519e-13	68.57	8.61771e-07	3	2784.23	1.18698	34.5183	0
cNAKLnLTSR	2	O95274	C1(Carbamidomethyl); N6(Deamidated)	0	5.232e-05	57.96	3.01517e-05	2	1177.6	-0.533984	15.1605	1
EAcQGTSPPVVScYnASDHVYKGcFDGnVTLTAAnVTVSLPVR	1	O95274	C3(Carbamidomethyl); C13(Carbamidomethyl); N15(Deamidated); C24(Carbamidomethyl); N28(Deamidated); N35(Deamidated)	0	9.93e-07	48.05	0.000173126	4	4644.15	4.32232	39.7992	1
ALDPAGnESAYPPnGVEcYScVGLSR	1	O95274	N7(Deamidated); N14(Deamidated); C18(Carbamidomethyl); C21(Carbamidomethyl)	0	1.666e-07	33.91	0.00217447	2	2785.22	2.52555	35.8303	0
nKTYFSPR	1	O95274	N1(Deamidated)	0	0.001496	28.36	0.0129105	2	1013.51	0.0160006	15.7392	1
ALESSAPNLQLETSDVLAnVTYLKGELPAWAAR	1	Q8N271	N19(Deamidated)	0	3.089e-16	86.22	2.31618e-08	3	3528.83	1.94325	49.179	1
KnISIHQAYQQcK	2	Q8N271	N2(Deamidated); C12(Carbamidomethyl)	0	1.529e-10	81.07	1.18026e-07	2	1618.8	0.719119	13.1581	1
ALESSAPNLQLETSDVLAnVTYLK	1	Q8N271	N19(Deamidated)	0	8.237e-12	71.72	1.22145e-06	3	2577.33	-0.83094	46.2826	0
ILRnVSEcFLAR	2	Q8N271	N4(Deamidated); C8(Carbamidomethyl)	0	1.2e-08	52.44	8.38141e-05	3	1478.77	-2.45903	26.7062	1
GVPEANFSSMVQEEnSTFnALPALAAMQTSSVVQELKK	3	Q8N271	N15(Deamidated); N19(Deamidated)	0	3.789e-14	47.94	0.000220151	3	4054.97	1.33106	50.8805	1
nVSEcFLAR	1	Q8N271	N1(Deamidated); C5(Carbamidomethyl)	0	0.003525	44.72	0.000306931	2	1096.51	-0.128132	28.6945	0
SSVYPLLAAVGSLGQVLQVSVHHLQTLnATVVELQAGQQDLEPAIR	1	Q8N271	N28(Deamidated)	0	7.22e-10	42.37	0.000144857	4	4850.61	0.874215	54.7848	0
nISIHQAYQQcK	1	Q8N271	N1(Deamidated); C11(Carbamidomethyl)	0	8.6e-05	19.49	0.134953	3	1490.71	0.280095	18.394	0
MDPPcTnTTAASTYLNNPYVR	2	P10619	C5(Carbamidomethyl); N7(Deamidated)	0	1.568e-08	84.65	2.70787e-08	2	2387.06	0.0835435	33.8581	0
AQPGTMSnGTETR	2	Q9UGT4	N8(Deamidated)	0	6.192e-05	48.77	7.63252e-05	2	1350.6	0.195043	11.2329	0
SELVnETR	1	Q9UGT4	N5(Deamidated)	0	0.006788	44.31	0.000526367	2	948.464	0.318737	15.2962	0
DcVEcLLLHSGKPDnQTcHSLcR	2	P18084	C2(Carbamidomethyl); C5(Carbamidomethyl); N15(Deamidated); C18(Carbamidomethyl); C22(Carbamidomethyl)	0	7.747e-16	68.06	9.92599e-07	3	2800.23	2.44536	25.3065	0
NVMDKnGDAYGFYnNSVK	1	Q6P4A8	N6(Deamidated); N14(Deamidated)	0	1.455e-05	19.94	0.0395425	3	2037.88	-1.30008	26.7144	1
DYGSQEDFTQVWnTTMK	2	O60635	N13(Deamidated)	0	6.066e-15	119.26	3.73517e-12	2	2050.87	-0.127163	41.5857	0
KDYGSQEDFTQVWnTTMK	2	O60635	N14(Deamidated)	0	7.11e-12	90.8	6.6957e-09	3	2178.97	1.02292	32.0166	1
ccGVSnYTDWFEVYnATR	3	O14817	C1(Carbamidomethyl); C2(Carbamidomethyl); N6(Deamidated); N15(Deamidated)	0	9.22e-12	95.1	4.48093e-10	2	2243.9	0.441983	43.5579	0
YYIQNGIQSFMQnYSSIDVLLHQSR	1	P78527	N13(Deamidated)	0	3.454e-07	38.08	0.00257512	3	3005.45	2.80415	46.8526	0
DYnSSREDSLQDAWDYVQAQVK	2	P27701	N3(Deamidated)	0	3.025e-09	80.27	6.71902e-08	3	2618.17	1.49252	41.169	1
YncTATNHIGTR	2	O15394	N2(Deamidated); C3(Carbamidomethyl)	0	1.773e-07	89.89	6.7693e-09	2	1408.63	0.827995	13.7556	0
DKLVLPAKnTTNLK	2	O15394	N9(Deamidated)	0	3.287e-07	60.43	5.02682e-06	2	1555.91	1.87382	19.9924	2
FISnQTIYYSWEGNPInIScDVK	2	O15394	N4(Deamidated); N17(Deamidated); C20(Carbamidomethyl)	0	2.715e-07	52.98	5.84061e-05	2	2750.26	-0.294977	45.0361	0
LVLPAKnTTNLK	2	O15394	N7(Deamidated)	0	0.0002018	52.3	3.50362e-05	2	1312.79	1.45545	20.7078	1
SHGVQTMVVLNNLEPnTTYEIR	1	O15394	N16(Deamidated)	0	7.439e-06	52.21	0.000108812	2	2516.26	6.25233	33.8602	0
SFnATAERGEEMTFScR	1	O15394	N3(Deamidated); C16(Carbamidomethyl)	0	5.357e-06	47.47	5.99853e-05	3	1993.84	0.660159	24.1327	1
KMILEIAPTSDNDFGRYncTATNHIGTR	1	O15394	N18(Deamidated); C19(Carbamidomethyl)	0	4.609e-07	14.09	0.649253	4	3196.52	0.425118	28.0624	2
EGFSAnYSVLQSSVSEDFK	1	O14786	N6(Deamidated)	0	3.107e-11	105.89	2.61497e-10	2	2094.95	1.25595	39.3164	0
GPEcSQnYTTPSGVIK	1	O14786	C4(Carbamidomethyl); N7(Deamidated)	0	1.544e-09	74.16	4.0673e-07	2	1738.8	3.03854	23.0357	0
IGYSNnGSDWK	1	O14786	N6(Deamidated)	0	2.337e-05	53.93	1.65876e-05	2	1241.54	0.421685	21.2596	0
RGPEcSQnYTTPSGVIK	2	O14786	C5(Carbamidomethyl); N8(Deamidated)	0	6.494e-07	53.15	7.18996e-05	2	1894.9	2.11986	19.7489	1
nISGVVLADHSGAFHNK	3	Q92542	N1(Deamidated)	0	2.741e-09	88.65	2.14922e-08	2	1766.89	1.88256	23.898	0
TSLELWMHTDPVSQKnESVR	2	Q92542	N16(Deamidated)	0	3.089e-16	77.8	2.90428e-07	3	2358.14	0.99339	27.7311	1
SYLGDGPLQHYIAVSSPTnTTYVVQYALAnLTGTVVnLTR	1	Q92542	N19(Deamidated); N30(Deamidated); N37(Deamidated)	0	1.063e-13	74.54	4.11326e-07	3	4300.17	0.996233	55.233	0
LLYGFLIKAnNSWFQSILR	1	Q92542	N10(Deamidated)	0	2.031e-09	44.81	0.000262644	3	2284.25	0.400021	48.7847	1
DGYEPcVNEGMcVTYHnGTGYcK	1	Q04721	C6(Carbamidomethyl); C12(Carbamidomethyl); N17(Deamidated); C22(Carbamidomethyl)	0	4.58e-14	66.21	2.38765e-07	3	2712.05	0.882098	27.5629	0
NVISNInETSVILDWSWPLDTGGRK	2	P29320	N7(Deamidated)	0	3.412e-09	76.5	3.69389e-07	3	2815.43	1.21946	47.7798	1
GTnVTISSLKPDTIYVFQIR	2	P29320	N3(Deamidated)	0	5.819e-11	57.66	1.62826e-05	3	2253.21	0.709749	39.2819	0
MSVcTDnVTDLR	1	Q6UXG2	C4(Carbamidomethyl); N7(Deamidated)	0	2.965e-05	100.74	4.00584e-10	2	1411.62	0.640035	26.7718	0
TFNYnFSALANTVTLAGGPSFTSK	3	Q6UXG2	N5(Deamidated)	0	9.301e-07	74.85	5.31929e-07	3	2509.22	0.0511304	48.0346	0
MSVcTDnVTDLRIPEGESGFSK	1	Q6UXG2	C4(Carbamidomethyl); N7(Deamidated)	0	1.904e-07	64.96	3.30324e-06	3	2443.11	0.115152	32.3586	1
KMSVcTDnVTDLRIPEGESGFSK	1	Q6UXG2	C5(Carbamidomethyl); N8(Deamidated)	0	2.229e-07	33.12	0.00704479	3	2571.21	1.29658	28.4122	2
MYnGSVPFEER	1	P22413	N3(Deamidated)	0	6.77e-05	68.38	5.08239e-07	2	1329.58	0.744439	27.2255	0
cSFYKnNTK	1	P22413	C1(Carbamidomethyl); N6(Deamidated)	0	0.0002726	47.38	0.000102374	2	1162.52	0.263075	9.22099	1
nLScREPNQHFKPYLK	1	P22413	N1(Deamidated); C4(Carbamidomethyl)	0	0.0005979	13.24	0.879719	3	2032.01	0.310635	18.2449	1
MnASFSLK	1	P22413	N2(Deamidated)	0.001	0.01639	45.82	0.000217309	2	898.434	0.0213978	24.8315	0
ALKQYnSTGDYR	2	O43657	N6(Deamidated)	0	3.363e-05	65.56	2.59903e-06	3	1416.68	-0.0421136	14.2997	1
QYnSTGDYR	1	O43657	N3(Deamidated)	0	0.01322	58.11	3.01325e-06	2	1104.46	0.901234	13.312	0
KLLLSInVTNTR	2	P26006	N7(Deamidated)	0	6.129e-05	89.44	4.94868e-09	3	1372.82	1.55157	27.916	1
SLDAYPILNQAQALEnHTEVQFQK	1	P26006	N16(Deamidated)	0	3.385e-10	73.59	8.15979e-07	3	2758.37	2.04804	38.4475	0
LRPIIISMnYSLPLR	1	P26006	N9(Deamidated)	0	1.917e-12	70.88	3.71545e-07	3	1787.02	0.0387214	38.3095	0
AHcVWLEcPIPDAPVVTnVTVK	2	P26006	C3(Carbamidomethyl); C8(Carbamidomethyl); N18(Deamidated)	0	8.161e-09	41.58	0.00116069	3	2506.25	2.81981	37.5791	0
VWnSTFIEDYRDFDR	1	P26006	N3(Deamidated)	0	9.454e-05	27.06	0.0125945	3	1963.88	-0.954297	35.8847	1
SGEDAHEALLTLVVPPALLLSSVRPPGAcQAnETIFcELGnPFKR	1	P26006	C29(Carbamidomethyl); N32(Deamidated); C37(Carbamidomethyl); N41(Deamidated)	0	1.867e-05	24.99	0.0253565	4	4876.5	6.29283	52.0953	1
TGAVYLcPLTAHKDDcERMnITVK	2	P26006	C7(Carbamidomethyl); C16(Carbamidomethyl); N20(Deamidated)	0	1.202e-09	21.3	0.125652	4	2793.34	0.997761	26.0592	2
VWnSTFIEDYRDFDRVR	2	P26006	N3(Deamidated)	0	6.18e-05	13.28	0.763578	3	2219.06	1.63795	33.3487	2
MnITVK	1	P26006	N2(Deamidated)	0.003	0.1007	36.26	0.00300472	2	706.38	-0.876241	18.8603	0
AFSnSSYVLNPTTGELVFDPLSASDTGEYScEAR	2	Q9Y624	N4(Deamidated); C31(Carbamidomethyl)	0	1.931e-09	98.29	1.12671e-09	3	3685.65	1.05864	49.2227	0
AKGnGSSQPGTAR	1	Q9UL25	N4(Deamidated)	0	0.001385	26.61	0.0299034	2	1231.6	-0.322222	3.44634	1
GETASLLcnISVR	1	Q969P0	C8(Carbamidomethyl); N9(Deamidated)	0	2.129e-08	87.79	3.01078e-08	2	1420.71	0.779848	32.42	0
IGPGEPLELLcnVSGALPPAGR	1	Q969P0	C11(Carbamidomethyl); N12(Deamidated)	0	1.248e-09	67.54	2.77511e-06	3	2218.16	1.55011	47.8603	0
KLWADTTcGQnATELYcFYSENTDLTcR	1	Q9HB63	C8(Carbamidomethyl); N11(Deamidated); C17(Carbamidomethyl); C27(Carbamidomethyl)	0	1.908e-11	94.43	1.35217e-09	3	3418.47	0.458467	38.8393	1
YFATncSATFGLEDDVVKK	2	Q9HB63	N5(Deamidated); C6(Carbamidomethyl)	0	2.062e-15	92.14	7.3924e-09	3	2166.01	0.575269	31.3386	1
nGSGAVFPVAGADVQTLR	1	O00391	N1(Deamidated)	0	6.614e-10	59.73	1.70263e-05	2	1759.9	1.84389	37.5207	0
nGSVSRVPVLMESR	1	O00391	N1(Deamidated)	0	5.099e-07	51.14	0.000138059	3	1531.79	0.804261	25.8279	1
EAESLQPMTVVGTDYVFHnDTK	1	O15031	N19(Deamidated)	0	5.78e-15	83.35	5.66417e-08	3	2482.14	0.0878685	36.0564	0
ALSnISLR	1	O15031	N4(Deamidated)	0	0.003144	57.77	2.93276e-05	2	874.499	0.0204424	24.3289	0
VVFLSPAVPEEPEAYnLTVLIEMDGHR	1	O15031	N16(Deamidated)	0	1.046e-10	50.95	0.000141019	3	3026.52	1.25142	49.316	0
GGLnLTAVTVAAENnHTVAFLGTSDGR	1	O15031	N4(Deamidated); N15(Deamidated)	0	2.299e-08	49.01	0.000214781	3	2687.32	-4.36064	41.2038	0
ScVAVTSAQPQnMSR	1	O15031	C2(Carbamidomethyl); N12(Deamidated)	0	3.525e-05	43.42	0.000411764	2	1636.74	0.986411	20.5507	0
LSHDAnETLPLHLYVK	1	O15031	N6(Deamidated)	0	5.49e-05	37.46	0.00277286	4	1850.96	-0.0686046	27.4245	0
ncSFQPER	1	O15031	N1(Deamidated); C2(Carbamidomethyl)	0	0.003657	31.61	0.0025884	2	1038.43	0.700021	17.187	0
nVTIcVPDFGQDLYR	1	Q86VE9	N1(Deamidated); C5(Carbamidomethyl)	0	2.972e-06	71.45	8.66534e-07	2	1797.85	0.0125421	45.1366	0
YAAVnITTNQAAPSEVPTLR	1	P54753	N5(Deamidated)	0	8.01e-07	85.48	5.60616e-08	2	2117.09	3.01843	32.8718	0
HLLEnSTASVSEAERK	2	P42892	N5(Deamidated)	0	2.742e-11	90.64	1.46706e-08	3	1771.88	0.285711	17.5836	1
LLGGGDEEAIRPQMQQILDFETALAnITIPQEK	1	P42892	N26(Deamidated)	0	5.982e-14	61.8	8.42384e-06	3	3639.86	1.3057	53.063	0
AcMnETR	1	P42892	C2(Carbamidomethyl); N4(Deamidated)	0	0.00197	43.05	7.18403e-05	2	882.344	-0.198811	7.84595	0
LLGGGDEEAIRPQMQQILDFETALAnITIPQEKR	1	P42892	N26(Deamidated)	0	3.87e-09	40.48	0.000837166	4	3795.96	0.802273	48.5642	1
nSSVEAFKR	1	P42892	N1(Deamidated)	0	0.001219	37.24	0.00206735	2	1038.52	0.268472	14.5811	1
AcMnETRIEELR	2	P42892	C2(Carbamidomethyl); N4(Deamidated)	0	0.006753	29.53	0.0116444	3	1522.7	0.177689	21.4444	1
FFnFSWR	1	P42892	N3(Deamidated)	0.001	0.02399	42.43	0.000331458	2	1004.46	-1.10005	38.9298	0
YVHNHNTYTNNEncSSPSWQAQHESR	2	Q8IWU5	N13(Deamidated); C14(Carbamidomethyl)	0	3.243e-16	93.56	1.07936e-09	3	3161.32	2.2128	13.9691	0
HGSDYSKDYLTDLITnDSVSFFR	1	Q8IWU5	N16(Deamidated)	0	2.374e-09	62.84	5.74596e-06	4	2681.24	0.844762	41.9744	1
YLNEYnGSYVPPGWKEWVGLLK	1	Q8IWU5	N6(Deamidated)	0	1.411e-09	50.71	0.000147333	3	2613.31	1.39217	44.0578	1
FYnYTLcR	1	Q8IWU5	N3(Deamidated); C7(Carbamidomethyl)	0	0.01372	46.31	0.000178921	2	1137.5	0.512129	26.0073	0
FKLEWLGncSGLNDETYGYK	2	P05026	N8(Deamidated); C9(Carbamidomethyl)	0	1.056e-15	102.91	4.83539e-10	2	2395.1	2.42167	36.7089	1
YLQPLLAVQFTnLTMDTEIR	1	P05026	N12(Deamidated)	0	3.994e-13	62.84	7.17594e-06	2	2367.23	1.05364	51.6281	0
VLGFKPKPPKnESLETYPVMK	3	P05026	N11(Deamidated)	0	6.08e-07	47.19	0.000176661	2	2403.3	1.22598	24.1016	1
YLQPLLAVQFTnLTMDTEIRIEcK	1	P05026	N12(Deamidated); C23(Carbamidomethyl)	0	3.813e-08	29.7	0.0186444	3	2897.47	-3.34807	48.3017	1
VLGFKPKPPKnESLETYPVmK	2	P05026	N11(Deamidated); M20(Oxidation)	0	2.882e-09	29	0.0129669	3	2419.29	-0.41965	22.148	1
FKLEWLGncSGLNDETYGYKEGKPcIIIK	1	P05026	N8(Deamidated); C9(Carbamidomethyl); C25(Carbamidomethyl)	0	8.462e-10	13.57	0.734034	4	3433.68	0.281943	33.8301	2
YKPDTLAVAVEnGTGTDR	2	Q9H0X4	N12(Deamidated)	0	1.082e-11	86.86	3.24549e-08	3	1907.93	-0.476098	25.4219	0
SDPHWESMLnATTR	1	Q9H0X4	N10(Deamidated)	0	6.477e-07	55.11	1.57243e-05	3	1645.73	-0.663973	28.531	0
NTnSSNnFSR	1	Q9H0X4	N3(Deamidated); N7(Deamidated)	0	0.004572	53.73	9.95561e-06	2	1142.47	-1.94996	9.64856	0
VTGSGGPFKSDPHWESMLnATTR	2	Q9H0X4	N19(Deamidated)	0	4.591e-07	31.88	0.00969708	4	2476.16	0.642253	29.0715	1
SDPHWESMLnATTRR	2	Q9H0X4	N10(Deamidated)	0	0.003496	23.58	0.042976	4	1801.83	0.512396	24.7141	1
nHSIFLADINQER	2	P50897	N1(Deamidated)	0	2.064e-05	61.74	9.37838e-06	3	1557.76	-1.13507	29.4893	0
FLnDSIVDPVDSEWFGFYR	1	P50897	N3(Deamidated)	0	1.021e-05	40.3	0.00109191	2	2307.06	1.08301	54.1427	0
LVQAEYWHDPIKEDVYRnHSIFLADINQER	1	P50897	N18(Deamidated)	0	1.308e-08	18.04	0.244191	4	3699.82	1.40391	32.6384	2
AFnSTLPTMAQMEK	1	P16070	N3(Deamidated)	0	5.651e-08	63.45	5.10597e-06	2	1569.73	2.32025	31.923	0
AFnSTLPTmAQMEK	1	P16070	N3(Deamidated); M9(Oxidation)	0	4.729e-06	45.99	0.000193861	2	1585.72	0.653798	26.7515	0
HKSnITFNNnDTVSFLEYR	2	Q8WTV0	N4(Deamidated); N10(Deamidated)	0	2.115e-09	108	2.2981e-10	3	2301.08	1.61709	29.935	1
SnITFNNnDTVSFLEYR	1	Q8WTV0	N2(Deamidated); N8(Deamidated)	0	6.055e-07	87.23	1.58957e-08	2	2035.92	-1.39834	40.4401	0
TLFAnGSIYPPNEGFcPcLESGIQnVSTcR	1	Q8WTV0	N5(Deamidated); C16(Carbamidomethyl); C18(Carbamidomethyl); N25(Deamidated); C29(Carbamidomethyl)	0	2.222e-12	64.26	2.62481e-06	3	3390.52	2.7688	44.9655	0
VDFWHSDQcnMInGTSGQMWPPFMTPESSLEFYSPEAcR	1	Q8WTV0	C9(Carbamidomethyl); N10(Deamidated); N13(Deamidated); C38(Carbamidomethyl)	0	4.454e-06	24.1	0.00564115	3	4640.95	5.43175	52.6412	0
RSDSVILNVLYGPDAPTISPLnTSYR	1	P06731	N22(Deamidated)	0	3.63e-11	60.48	1.29828e-05	3	2849.47	1.53676	43.91	1
TLTLFnVTR	1	P06731	N6(Deamidated)	0	0.0003849	53.15	4.16388e-05	2	1065.6	1.71118	34.4559	0
nMTFDLPSDATVVLnR	1	P11279	N1(Deamidated); N15(Deamidated)	0	1.378e-07	73.8	5.83617e-07	2	1794.86	1.44186	46.6191	0
SScGKEnTSDPSLVIAFGR	1	P11279	C3(Carbamidomethyl); N7(Deamidated)	0	1.473e-08	62.78	7.56575e-06	3	2025.96	2.70829	29.082	1
nATRYSVQLMSFVYnLSDTHLFPnASSK	2	P11279	N1(Deamidated); N15(Deamidated); N24(Deamidated)	0	1.335e-12	59.07	1.98827e-05	3	3193.53	3.51173	49.4288	1
YSVQLMSFVYnLSDTHLFPnASSK	1	P11279	N11(Deamidated); N20(Deamidated)	0	9.963e-12	56.4	3.58521e-05	3	2750.31	3.4917	49.3229	0
KDnTTVTR	1	P11279	N3(Deamidated)	0	1.284e-05	50.69	0.000120287	2	935.479	-0.0563236	4.11698	1
GHTLTLnFTR	2	P11279	N7(Deamidated)	0	0.009065	41.27	0.00136973	3	1160.61	0.431337	23.1546	0
DnTTVTR	1	P11279	N2(Deamidated)	0	0.00434	29	0.0171843	2	807.385	0.841023	8.06294	0
LLSTANYnTSHYNNDLWQIFENPVDWK	4	O00469	N8(Deamidated)	0	2.134e-09	74.11	5.29825e-07	3	3283.54	1.26368	46.7233	0
LTHLHEGLPVKnGTR	3	O00469	N12(Deamidated)	0	2.664e-05	55.75	3.79153e-05	4	1672.91	-0.44542	14.8939	1
EAInITLDHK	1	O00469	N4(Deamidated)	0	0.002465	46.91	0.000198612	3	1154.6	-0.81855	22.5484	0
YncSIESPR	1	O00469	N2(Deamidated); C3(Carbamidomethyl)	0	0.0009214	46.39	9.06979e-05	2	1126.48	0.274196	17.5877	0
LLSTANYnTSHYNNDLWQIFENPVDWKEK	4	O00469	N8(Deamidated)	0	1.27e-06	31.51	0.0095706	4	3540.67	-0.192802	41.6206	1
LLnLTNPEASTSVLMAVTHTLTQYPFDFR	1	Q9Y5L3	N3(Deamidated)	0	5.056e-12	80.83	1.06559e-07	3	3280.67	3.24074	54.3357	0
LLnLTNPEASTSVLmAVTHTLTQYPFDFR	1	Q9Y5L3	N3(Deamidated); M15(Oxidation)	0	6.21e-05	10.99	1.21414	3	3296.65	-0.416499	53.7562	0
YHQPGHEAVTSAVDQLQQEFHccGSnNSQDWR	4	P48509	C22(Carbamidomethyl); C23(Carbamidomethyl); N26(Deamidated)	0	1.857e-13	35.64	0.000709534	4	3786.61	0.856569	29.086	0
RYHQPGHEAVTSAVDQLQQEFHccGSnNSQDWR	1	P48509	C23(Carbamidomethyl); C24(Carbamidomethyl); N27(Deamidated)	0	1.797e-11	30.72	0.00216043	4	3942.71	0.129902	26.8572	1
TWnQSIALR	1	P12259	N3(Deamidated)	0	0.001857	44.63	0.000652543	2	1089.57	-0.00377701	27.4546	0
LGQGcFGEVWMGTWnGTTK	1	P07947	C5(Carbamidomethyl); N15(Deamidated)	0	6.072e-07	52.47	4.13355e-05	2	2129.94	1.21899	41.5137	0
YVInGTYAnETKLK	2	Q6PCB8	N4(Deamidated); N9(Deamidated)	0	1.804e-10	81.35	1.30809e-07	2	1615.82	1.7595	24.0422	1
YVInGTYAnETK	1	Q6PCB8	N4(Deamidated); N9(Deamidated)	0	9.637e-05	64.03	3.6176e-06	2	1374.64	1.33077	23.9733	0
SGVISDTELQQALSnGTWTPFNPVTVR	2	O75340	N15(Deamidated)	0	2.634e-14	111.99	1.09407e-10	2	2918.46	3.09701	48.5822	0
LLLVDFSSQALFQDKnSSQVLGEK	2	Q9Y653	N16(Deamidated)	0	6.903e-09	72.89	6.55406e-07	3	2667.39	1.81598	42.6251	1
VAnLTEPVVLTFQHQLQPK	1	Q9Y653	N3(Deamidated)	0	1.308e-09	59.6	8.49771e-06	3	2163.18	0.237306	36.3929	0
nVTLQcVFWVEDPTLSSPGHWSSAGcETVRR	2	Q9Y653	N1(Deamidated); C6(Carbamidomethyl); C26(Carbamidomethyl)	0	5.226e-12	46.6	0.000255968	4	3576.67	0.779285	39.6909	1
FMGDMVSFEEDRInATVWK	2	Q9Y653	N14(Deamidated)	0	4.871e-10	31.63	0.0070081	3	2276.04	1.58338	39.7883	1
SEASEGnITVTcR	1	Q29983	N7(Deamidated); C12(Carbamidomethyl)	0	3.477e-06	86.87	1.16158e-08	2	1424.63	-0.265166	18.912	0
VcEIHEDnSTR	2	Q29983	C2(Carbamidomethyl); N8(Deamidated)	0	6.03e-07	72.09	2.28666e-07	2	1360.58	1.39009	9.30943	0
AKPQGQWAEDVLGnKTWDRETR	2	Q29983	N14(Deamidated)	0	6.719e-10	59.74	1.90574e-05	3	2586.28	2.34416	23.6914	2
AKPQGQWAEDVLGnKTWDR	1	Q29983	N14(Deamidated)	0	7.44e-16	53.47	8.34342e-05	3	2200.08	0.755369	26.2216	1
FTcYMEHSGnHSTHPVPSGK	1	Q29983	C3(Carbamidomethyl); N10(Deamidated)	0	1.043e-07	17.08	0.0940245	4	2273.97	1.19257	14.8128	0
TVPPMVnVTR	1	Q29983	N7(Deamidated)	0.001	0.018	28.81	0.0154539	2	1114.59	1.43237	25.7208	0
GnHTKDFLTYK	2	Q86UK0	N2(Deamidated)	0	5.33e-08	69.75	1.39821e-06	3	1324.65	0.142075	17.2396	1
VnMSKYDAAR	1	Q86UK0	N2(Deamidated)	0	0.0001477	49.59	0.000120341	2	1155.55	0.189597	15.6684	1
LLKQnSTSEDIRR	3	Q86UK0	N5(Deamidated)	0	8.773e-05	36.32	0.00355852	4	1560.83	-0.437312	13.0272	2
GnLTYGYVTILnGSDIR	1	P08648	N2(Deamidated); N12(Deamidated)	0	6.855e-10	83.94	6.29687e-08	2	1857.93	1.356	42.2692	0
HPGnFSSLScDYFAVnQSR	1	P08648	N4(Deamidated); C10(Carbamidomethyl); N16(Deamidated)	0	1.319e-08	69.72	4.79968e-07	3	2187.94	0.650903	32.7309	0
NLnNSQSDVVSFR	1	P08648	N3(Deamidated)	0	3.553e-05	62.42	7.04539e-06	2	1480.7	1.29678	25.9674	0
VTGLncTTNHPINPK	3	P08648	N5(Deamidated); C6(Carbamidomethyl)	0	1.503e-05	60.98	1.27679e-05	3	1666.82	-1.59906	17.9182	0
AILLYIFSInGTTEENLDR	1	O00186	N10(Deamidated)	0	4.074e-06	37.26	0.00293173	2	2183.13	2.33341	52.585	0
GcVLLSYLnETVTVSASLESVRGnR	1	P01023	C2(Carbamidomethyl); N9(Deamidated); N24(Deamidated)	0	1.086e-05	15.95	0.404015	3	2726.39	7.91173	45.0504	1
VQEVLnGTEVNLQHLTALVDcR	1	Q9C0H2	N6(Deamidated); C21(Carbamidomethyl)	0	1.057e-13	91	1.20341e-08	3	2509.27	0.44552	40.0983	0
VWDTAVGLnHTAEPSLQTLER	1	Q9C0H2	N9(Deamidated)	0	4.871e-10	68.38	2.83888e-06	3	2338.17	0.385692	33.7646	0
TVAGVQDRVWDTAVGLnHTAEPSLQTLER	1	Q9C0H2	N17(Deamidated)	0	1.798e-09	49.48	0.000178661	4	3164.6	1.95505	34.6887	1
NAAEIVQYGVKnNTTFLEcAPK	2	Q99985	N12(Deamidated); C19(Carbamidomethyl)	0	1.927e-08	62.79	1.02836e-05	3	2468.21	0.708754	31.4631	1
VVVLPTnNSVSGELILEELEVFK	2	Q99985	N7(Deamidated)	0	1.03e-05	55.81	1.88944e-05	2	2529.37	1.53777	53.976	0
NnTTFLEcAPK	1	Q99985	N2(Deamidated); C8(Carbamidomethyl)	0	0.0002293	52.47	4.47329e-05	2	1295.59	0.183984	24.8514	0
LATIAnFSALGLEPGR	2	O76082	N6(Deamidated)	0	3.033e-10	137.03	3.2497e-13	2	1630.88	-0.633677	42.8675	0
nHTVPLR	1	O76082	N1(Deamidated)	0	0.01024	47.63	0.000121672	2	837.458	-0.154199	13.074	0
VPDAAnLSSAWR	1	O76082	N6(Deamidated)	0	4.386e-06	45.17	0.000358824	2	1287.63	0.0969757	30.9507	0
VPDAAnLSSAWRnHTVPLR	2	O76082	N6(Deamidated); N13(Deamidated)	0	6.577e-07	31.38	0.0136095	3	2106.08	2.55729	30.1016	1
ISEEFLKnISASAR	2	P52569	N8(Deamidated)	0	9.344e-12	73.25	5.98536e-07	2	1565.82	1.03065	29.2497	1
FGnLSLYLDNHYcTASATAAAAR	1	Q9HC84	N3(Deamidated); C13(Carbamidomethyl)	0	2.393e-12	64.92	3.73644e-06	3	2488.16	1.1251	33.7423	0
YAnQTcGLcGDFNGLPAFNEFYAHNAR	1	Q9HC84	N3(Deamidated); C6(Carbamidomethyl); C9(Carbamidomethyl)	0	1.304e-08	63.96	1.36609e-06	3	3108.34	2.03364	39.0282	0
AFGQFFSPGEVIYnKTDR	1	Q9HC84	N14(Deamidated)	0	3.821e-10	58.96	2.06468e-05	3	2077	0.813341	34.5541	1
GncTYVLMR	1	Q9HC84	N2(Deamidated); C3(Carbamidomethyl)	0	0.007789	41.63	0.000371017	2	1114.5	0.967298	24.6802	0
DIEcQAESFPnWTLAQVGQK	1	Q9HC84	C4(Carbamidomethyl); N11(Deamidated)	0	0.003649	27.65	0.0197559	2	2322.08	4.12499	43.5723	0
VVTQnSSSGnVTHEK	2	P43007	N5(Deamidated); N10(Deamidated)	0	9.25e-11	76.86	2.10184e-07	2	1588.75	1.42671	9.11292	0
HLYTTTGGETDFTnVTSLR	1	Q99523	N14(Deamidated)	0	6.449e-15	85.17	3.66427e-08	3	2114.01	1.11605	29.7657	0
LAnNTHQHVFDDLR	5	Q99523	N3(Deamidated)	0	8.944e-09	71.12	1.06244e-06	2	1680.81	1.50622	20.1433	0
VFGSQnLTTVK	1	Q9Y4L1	N6(Deamidated)	0	0.000318	77.2	2.49615e-07	2	1194.64	0.608829	24.6613	0
LSALDNLLnHSSMFLK	1	Q9Y4L1	N9(Deamidated)	0	3.982e-08	44.68	0.00057529	3	1803.93	-0.385434	41.5456	0
EAGnHTSGAGLVQINK	2	P20645	N4(Deamidated)	0	3.313e-06	73.1	7.32219e-07	2	1596.8	1.50246	19.1657	0
LnETHIFnGSNWIMLIYK	1	P20645	N2(Deamidated); N8(Deamidated)	0	4.098e-07	62.97	8.68017e-06	3	2195.08	-0.320286	48.6559	0
GYYnQSEAGSHTLQR	1	P30508	N4(Deamidated)	0	9.479e-14	94.5	2.94495e-09	2	1711.77	1.74079	16.7865	0
IAVQFGPGFSWIAnFTK	2	P13473	N14(Deamidated)	0	1.019e-06	73	7.19204e-07	2	1883.97	0.402836	50.8279	0
VQPFnVTQGK	1	P13473	N5(Deamidated)	0	0.004959	44.74	0.000540538	2	1118.58	-0.16753	22.8506	0
VASVININPnTTHSTGScR	1	P13473	N10(Deamidated); C18(Carbamidomethyl)	0	1.391e-10	44.1	0.000564115	3	2028.98	0.560936	22.2067	0
LnSSTIK	1	P13473	N2(Deamidated)	0.001	0.02866	38.48	0.00214987	2	763.419	-1.40373	11.99	0
WQMnFTVR	1	P13473	N4(Deamidated)	0.001	0.01685	28.76	0.0109762	2	1082.51	1.8129	32.0987	0
NKANIQFGDnGTTISAVSNK	1	Q14108	N10(Deamidated)	0	1.908e-08	90.05	1.7448e-08	3	2080.03	0.462506	23.228	1
YKVPAEILAnTSDNAGFcIPEGNcLGSGVLnVSIcK	1	Q14108	N10(Deamidated); C18(Carbamidomethyl); C24(Carbamidomethyl); N31(Deamidated); C35(Carbamidomethyl)	0	2.437e-08	86.81	2.8766e-08	3	3869.85	2.0709	44.8614	1
ANIQFGDnGTTISAVSNK	1	Q14108	N8(Deamidated)	0	7.427e-10	66.47	3.88856e-06	2	1837.89	0.143988	28.9393	0
TMVFPVMYLnESVHIDKETASR	1	Q14108	N10(Deamidated)	0	1.388e-09	43.26	0.000802507	4	2568.25	1.16796	36.5145	1
VVAnGTGTQGQLK	1	P08236	N4(Deamidated)	0	3.352e-09	86.55	3.88398e-08	2	1273.67	0.105982	15.4193	0
ITIAInNTLTPTTLPPGTIQYLTDTSKYPK	1	P08236	N6(Deamidated)	0	5.644e-11	49.99	5.11176e-05	3	3276.77	3.20086	43.4231	1
IAnETRYPHSVAK	1	P08236	N3(Deamidated)	0	5.022e-05	37.21	0.00349798	2	1486.76	-1.79092	12.9619	1
IAnETR	2	P08236	N3(Deamidated)	0.001	0.03427	27.79	0.0263651	2	704.357	-0.735675	4.69167	0
YGEnNSLSVEGFRK	2	Q13433	N4(Deamidated)	0	2.064e-07	88.77	1.71234e-08	2	1600.76	1.33649	22.2355	1
LLTSHGMGIQVPLnATEFNYLcPAIINQIDAR	1	Q13433	N14(Deamidated); C22(Carbamidomethyl)	0	1.969e-09	77.24	2.51103e-07	3	3570.81	-0.0813944	48.2402	0
LNPTVTYGnDSFSAK	1	P05362	N9(Deamidated)	0	4.356e-07	81.32	9.48207e-08	2	1614.76	-0.423397	26.885	0
AnLTVVLLR	1	P05362	N2(Deamidated)	0	0.00082	50.28	4.87532e-05	2	999.62	0.529758	35.496	0
SFScSATLEVAGQLIHKnQTR	2	P05362	C4(Carbamidomethyl); N18(Deamidated)	0	2.088e-11	46.15	0.000493815	3	2348.17	1.58755	28.7135	1
RDHHGAnFScR	1	P05362	N7(Deamidated); C10(Carbamidomethyl)	0	7.46e-06	40.57	0.00035957	3	1357.58	0.0407368	6.53569	1
AnLTVVLLRGEK	2	P05362	N2(Deamidated)	0	3.3e-05	30.91	0.00506851	3	1313.78	0.127507	29.0317	1
VMIEPSGPIHVPKGnGTILK	2	Q6UXI9	N15(Deamidated)	0	8.39e-08	68.7	1.18709e-06	3	2088.15	0.277223	27.5129	1
GnGTILK	1	Q6UXI9	N2(Deamidated)	0.002	0.06454	35.42	0.00752145	2	703.398	-0.653183	14.3181	0
nTTWQAGHNFYNVDMSYLK	1	P07858	N1(Deamidated)	0	5.157e-07	57.54	1.39196e-05	3	2290.02	0.614459	35.3308	0
YVQDQVAAPFQLSnHTGR	1	Q14766	N14(Deamidated)	0	2.112e-13	53.18	8.22235e-05	3	2031.99	0.555008	27.6979	0
GSQWSDIEEFcnRScEVPTR	1	P08174	C11(Carbamidomethyl); N12(Deamidated); C15(Carbamidomethyl)	0	1.574e-08	24.4	0.0123447	3	2458.04	1.68231	29.5141	1
HYHSMEVFTHYDLLNLnGTK	1	Q9Y4K0	N17(Deamidated)	0	4.778e-09	56.38	3.31408e-05	4	2420.14	0.469082	30.6725	0
DVEcGEGHFcHDnQTccR	1	P28799	C4(Carbamidomethyl); C10(Carbamidomethyl); N13(Deamidated); C16(Carbamidomethyl); C17(Carbamidomethyl)	0	9.42e-09	64.11	3.87231e-07	2	2281.81	1.32238	14.4247	0
cLSKEnATTDLLTKLPAHTVGDVK	2	P28799	C1(Carbamidomethyl); N6(Deamidated)	0	3.527e-10	46.26	0.000311118	4	2612.36	0.613905	27.3726	2
YGccPMPnATccSDHLHccPQDTVcDLIQSK	2	P28799	C3(Carbamidomethyl); C4(Carbamidomethyl); N8(Deamidated); C11(Carbamidomethyl); C12(Carbamidomethyl); C18(Carbamidomethyl); C19(Carbamidomethyl); C25(Carbamidomethyl)	0	5.95e-08	21.51	0.00704644	3	3785.48	1.80189	29.5908	0
KYPScGGLLQSPIDLHSDILQYDASLTPLEFQGYnLSANK	2	O43570	C5(Carbamidomethyl); N35(Deamidated)	0	8.909e-14	61.88	8.20523e-06	4	4454.19	1.8561	45.836	1
GTnYTVR	1	P07942	N3(Deamidated)	0.006	0.1817	43.06	0.000271871	2	811.394	-1.00319	10.9389	0
VAYSnDSANWTEYQDPR	1	Q08431	N5(Deamidated)	0	1.725e-08	107.03	7.82703e-11	2	2016.86	1.90402	28.2175	0
nNSIPDK	2	Q08431	N1(Deamidated)	0	0.01047	41.86	0.000270426	2	788.379	0.101903	10.1386	0
nFSScSAEDFEKLTLNK	1	Q13443	N1(Deamidated); C5(Carbamidomethyl)	0	6.5e-07	77.45	1.78088e-07	3	1990.91	-0.575507	33.2342	1
DASINIENMQFIHnGTYIcDVK	1	O95297	N14(Deamidated); C19(Carbamidomethyl)	0	4.776e-09	86.8	2.31912e-08	3	2583.19	1.04686	38.7212	0
EIFVAnGTQGK	1	O95297	N6(Deamidated)	0	8.129e-06	55.95	4.1799e-05	2	1164.59	0.261078	22.008	0
SPIVTHcnVSTVNK	2	Q9UN76	C7(Carbamidomethyl); N8(Deamidated)	0	3.567e-11	82.15	8.2897e-08	2	1556.78	2.32535	16.4699	0
APQHVVNHLPPYTnVSLK	1	Q15262	N14(Deamidated)	0	2.615e-06	10.11	1.38449	3	2015.07	-0.0254737	22.8127	0
GnTSGVLVVLTK	1	Q6P4Q7	N2(Deamidated)	0	3.64e-05	68.63	1.3983e-06	2	1188.69	1.77269	32.022	0
DLVVQQLVnVSR	1	Q6P4Q7	N9(Deamidated)	0	1.521e-05	61.29	8.61902e-06	2	1370.77	1.04984	39.0952	0
GAnDSTSAMPEQMK	1	O95084	N3(Deamidated)	0	5.792e-07	90.06	1.72599e-09	2	1467.61	1.21295	19.8154	0
DGTPLSDGQSnHTVSSK	1	Q13308	N11(Deamidated)	0	4.267e-08	84.02	3.4278e-08	2	1730.79	3.41843	15.8405	0
SAnASFNIK	1	Q13308	N3(Deamidated)	0	0.004856	55.74	2.56018e-05	2	952.474	0.725891	19.777	0
RQDVnITVATVPSWLK	1	Q13308	N5(Deamidated)	0	0.004635	51.84	8.67393e-05	2	1828	1.52396	34.963	1
ATVFAnGSLLLTQVRPR	1	Q13308	N6(Deamidated)	0	7.087e-06	40.17	0.000668321	3	1844.04	0.643668	34.46	0
QHTVTTTTKGEnFTETDVK	3	P04156	N12(Deamidated)	0	1.276e-11	92.8	9.36781e-09	2	2138.03	2.44131	15.9461	1
YPNQVYYRPMDEYSNQNNFVHDcVnITIK	1	P04156	C23(Carbamidomethyl); N25(Deamidated)	0	5.482e-08	14.03	0.349899	4	3622.65	3.0178	32.0574	0
IAQLRPEDLAGLAALQELDVSnLSLQALPGDLSGLFPR	1	Q6EMK4	N22(Deamidated)	0	2.584e-10	71.03	2.64268e-07	3	4002.15	-0.995784	55.0447	0
LPASLAEYTVTQLRPnATYSVcVMPLGPGR	1	Q6EMK4	N16(Deamidated); C22(Carbamidomethyl)	0	4.868e-13	37.23	0.00255466	3	3262.67	3.81196	42.9297	0
LHEITnETFR	2	Q6EMK4	N6(Deamidated)	0	0.0005416	25.85	0.032632	2	1260.62	0.433772	20.2471	0
LINDYVKnGTR	2	P01011	N8(Deamidated)	0	0.0005796	60.99	1.27385e-05	2	1293.68	1.18631	18.6588	1
YTGnASALFILPDQDKMEEVEAMLLPETLKR	1	P01011	N4(Deamidated)	0	2.171e-06	23.72	0.0645422	3	3523.78	3.26979	49.7869	2
VIDGTPcDQnGTAIcVSGQcK	1	Q6ZMP0	C7(Carbamidomethyl); N10(Deamidated); C15(Carbamidomethyl); C20(Carbamidomethyl)	0	3.408e-08	78.31	8.33774e-08	2	2281	2.61273	25.5116	0
VVEIPEGATKInITEMYK	2	Q6ZMP0	N12(Deamidated)	0	5.089e-08	53.57	6.43928e-05	3	2036.07	2.06331	33.931	1
InITEMYK	1	Q6ZMP0	N2(Deamidated)	0	0.001904	52.82	4.33589e-05	2	1012.5	0.907603	29.2838	0
nLSTcFSSGDLFTAHnFSEQSR	1	Q15043	N1(Deamidated); C5(Carbamidomethyl); N16(Deamidated)	0	2.623e-10	78.31	7.15718e-08	3	2507.08	-0.00407565	38.26	0
GnVTQHVQGHR	2	Q15043	N2(Deamidated)	0	2.217e-07	66.92	3.01805e-06	2	1233.61	0.475854	6.33407	0
LnQTEPVAGNYYPVNTR	1	O00754	N2(Deamidated)	0	1.576e-11	83.51	7.68757e-08	2	1936.94	1.57643	28.001	0
TPLVQEVHQnFSAWcSQVVR	1	O00754	N10(Deamidated); C15(Carbamidomethyl)	0	2.037e-15	57.18	3.45523e-05	3	2386.16	0.738233	35.3839	0
FLKPYTLEEQKnLTVcPDGALFEQK	2	P54709	N12(Deamidated); C16(Carbamidomethyl)	0	7.172e-15	66.23	3.56157e-06	3	2969.51	3.26973	32.9505	1
KLHVGYLQPLVAVQVSFAPnNTGK	1	P54709	N20(Deamidated)	0	7.216e-07	13.25	0.317011	3	2581.41	-2.85932	34.791	1
IYVLDGTQnDTAFVFPR	1	Q9NRN5	N9(Deamidated)	0	3.033e-08	118.05	2.5068e-11	2	1956.97	-0.678412	43.4389	0
DLQGNPIAnATISVEGIDHDVTSAK	1	P16870	N9(Deamidated)	0	2.794e-13	79.88	1.86585e-07	3	2566.27	1.2767	39.5371	0
GnETIVNLIHSTR	2	P16870	N2(Deamidated)	0	5.873e-07	58.37	2.00126e-05	3	1454.76	-1.51522	27.7249	0
DLQGnPIAnATISVEGIDHDVTSAKDGDYWR	1	P16870	N5(Deamidated); N9(Deamidated)	0	3.767e-09	39.75	0.00172658	3	3359.6	9.1552	40.8621	1
ELLIFLAQYLcNEYQKGnETIVNLIHSTR	1	P16870	C11(Carbamidomethyl); N18(Deamidated)	0	3.099e-06	17.03	0.296238	4	3480.78	-0.191859	52.8329	1
NWQLTEEDFGnTSGR	1	P30825	N11(Deamidated)	0	1.866e-08	73.15	2.49349e-07	2	1754.77	2.1206	31.9892	0
LcLNnDTK	1	P30825	C2(Carbamidomethyl); N5(Deamidated)	0.001	0.02008	53.04	4.12172e-05	2	978.456	0.115546	16.2858	0
DSPVLPVTLQcnLTSSSHTLTYSYWTK	1	Q9Y639	C11(Carbamidomethyl); N12(Deamidated)	0	9.579e-14	60.27	1.64452e-05	3	3099.5	-0.354877	42.8771	0
AnATIEVK	1	Q9Y639	N2(Deamidated)	0	0.01028	40.41	0.00174703	2	846.457	0.656488	16.0814	0
nASNMEYR	1	Q9Y639	N1(Deamidated)	0	0.005684	29.94	0.00177434	2	985.404	0.0601216	14.7749	0
KKEnGMPMDIVnTSGR	1	Q9Y639	N4(Deamidated); N12(Deamidated)	0	3.442e-07	26.58	0.0300008	3	1778.84	0.18753	22.1661	2
IVTSEEVIIRDSPVLPVTLQcnLTSSSHTLTYSYWTK	1	Q9Y639	C21(Carbamidomethyl); N22(Deamidated)	0	8.966e-07	23.29	0.0407868	4	4239.17	4.57749	42.2192	1
SPVQEnSSDLNK	1	Q9NY35	N6(Deamidated)	0	1.614e-06	83.29	4.07868e-08	2	1318.61	0.880887	14.9508	0
YnGTVGLWR	1	Q9NY35	N2(Deamidated)	0	0.002312	32.32	0.00709227	2	1066.53	0.120559	28.8565	0
DLGPTLAnSTHHNVR	3	P04062	N8(Deamidated)	0	2.789e-12	79.55	2.06307e-07	2	1632.81	1.9243	18.2429	0
YHQcYnGSGMDYR	2	Q01974	C4(Carbamidomethyl); N6(Deamidated)	0	4.428e-06	57.94	1.60313e-06	3	1651.63	0.262715	16.6044	0
VIGnGSFGVVYQAK	1	P49841	N4(Deamidated)	0	3.716e-08	46.17	0.000323672	2	1439.75	0.176507	31.7053	0
DMnQTLGDnITVK	1	Q8TCT8	N3(Deamidated); N9(Deamidated)	0	3.694e-05	61.86	6.64661e-06	2	1450.67	0.973875	31.6303	0
GGAEAMLVVNnSVLFPPSGnRSEFPDVK	2	Q8TCT8	N11(Deamidated); N20(Deamidated)	0	1.678e-12	60.73	1.70324e-05	3	2933.45	3.42609	41.7284	1
LQFDDnGTYTcQVK	1	O60487	N6(Deamidated); C11(Carbamidomethyl)	0	6.639e-06	90.98	3.87027e-09	2	1689.74	0.619367	26.5131	0
VLEAVnGTDAR	1	O60487	N6(Deamidated)	0	5.314e-06	69.12	1.89816e-06	2	1145.58	0.215047	20.0752	0
nNTIVNELVR	2	P10253	N1(Deamidated)	0	0.0003125	52.68	8.30846e-05	2	1172.63	0.497835	32.5687	0
QVVEnMTR	1	P10253	N5(Deamidated)	0	0.009603	41.84	0.000700461	2	977.472	-0.0765628	16.4245	0
VTVLGVATAPQQVLSnGVPVSnFTYSPDTK	1	P10253	N16(Deamidated); N22(Deamidated)	0	3.845e-10	32.73	0.00677335	3	3091.59	1.64409	46.3246	0
VTVLGVATAPQQVLSNGVPVSnFTYSPDTK	1	P10253	N22(Deamidated)	0	3.012e-05	18.31	0.152736	3	3090.6	1.52846	45.2844	0
IILnFTSLDLYR	1	P13497	N4(Deamidated)	0	2.198e-05	80.63	8.95242e-08	2	1468.8	0.219185	46.8877	0
LnGSITSPGWPK	1	P13497	N2(Deamidated)	0	1.695e-06	69.88	1.42894e-06	2	1257.65	0.736079	28.5876	0
LcDEGHGLEVEIncTR	2	P25445	C2(Carbamidomethyl); N13(Deamidated); C14(Carbamidomethyl)	0	9.128e-10	86.65	1.28682e-08	2	1902.83	1.06617	25.1426	0
nGTQVHGTITGVDVSMNTHLK	1	P62314	N1(Deamidated)	0	8.181e-15	81.83	1.11545e-07	3	2210.09	0.871508	25.8957	0
LKGEAEYQEIRNPnGTVTVISR	2	Q15223	N14(Deamidated)	0	6.79e-10	55.13	4.72629e-05	3	2475.29	1.73064	22.8342	2
ESQLnLTVMAKPTNWIEGTQAVLR	1	Q15223	N5(Deamidated)	0	2.71e-12	45.44	0.000361485	3	2700.42	5.07242	42.682	0
ADANPPATEYHWTTLnGSLPK	1	Q15223	N16(Deamidated)	0	5.294e-09	44.44	0.000523435	3	2284.09	1.13616	30.6287	0
ILAPAYFILGGnQSGEGcVITR	1	Q13510	N12(Deamidated); C18(Carbamidomethyl)	0	6.829e-09	61.68	1.17502e-05	2	2337.19	0.257809	45.2823	0
VQcSPGHFYnTTTHR	3	Q9NQ36	C3(Carbamidomethyl); N10(Deamidated)	0	1.627e-11	72.36	3.60074e-07	2	1805.8	1.41097	15.2487	0
LQLSNGnMTLTLLSVKR	1	P40199	N7(Deamidated)	0	4.134e-07	59.87	7.05814e-06	3	1889.05	1.08641	34.7532	1
ATVMFEcDKGFYLDGSDTIVcDSnSTWDPPVPK	1	P15529	C7(Carbamidomethyl); C21(Carbamidomethyl); N24(Deamidated)	0	2.386e-09	64.75	1.87581e-06	3	3752.65	2.66603	43.0018	1
nHTWLPVSDDAcYR	1	P15529	N1(Deamidated); C12(Carbamidomethyl)	0	5.665e-06	47.41	8.6237e-05	3	1734.75	-0.690874	29.6483	0
KGYFYIPPLATHTIcDRnHTWLPVSDDAcYR	1	P15529	C15(Carbamidomethyl); N18(Deamidated); C29(Carbamidomethyl)	0	2.553e-13	23.3	0.0626765	4	3767.78	0.872877	33.7169	2
GYFYIPPLATHTIcDRnHTWLPVSDDAcYR	1	P15529	C14(Carbamidomethyl); N17(Deamidated); C28(Carbamidomethyl)	0	8.463e-08	16.64	0.290472	3	3639.69	3.13742	37.6297	1
TcIMEASTDFLPGLNFSncSR	1	Q13444	C2(Carbamidomethyl); N18(Deamidated); C19(Carbamidomethyl)	0	1.4e-06	43.98	0.00021397	2	2421.06	2.922	45.367	0
TcIMEASTDFLPGLnFSNcSRR	2	Q13444	C2(Carbamidomethyl); N15(Deamidated); C19(Carbamidomethyl)	0	0.000492	24.86	0.0320056	3	2577.17	4.78245	39.1879	1
AGPnGTLFVADAYK	1	Q9HDC9	N4(Deamidated)	0	1.248e-13	105.43	4.63997e-10	2	1424.71	0.37696	31.6625	0
TGALTVQnTTQLR	1	Q14517	N8(Deamidated)	0	8.275e-07	96.36	4.03455e-09	2	1403.75	0.964872	23.6046	0
QVYnLTVR	1	Q14517	N4(Deamidated)	0	0.006912	36.67	0.00237882	2	993.537	0.273158	23.3269	0
LSWAKPQPLnETAPSNLWK	1	Q14703	N10(Deamidated)	0	2.183e-09	59.52	1.71439e-05	3	2181.14	1.44045	32.6755	0
IQcTLSNPLFnTTSSIILTTcIPSSGHSR	1	P19256	C3(Carbamidomethyl); N11(Deamidated); C21(Carbamidomethyl)	0	2.124e-12	73.81	6.67537e-07	3	3206.59	1.93873	42.7143	0
RnSTSIYFK	1	P19256	N2(Deamidated)	0	0.007142	31.76	0.00916859	2	1116.57	0.200448	17.2125	1
nSTSIYFK	1	P19256	N1(Deamidated)	0.001	0.05737	49.52	0.000134024	2	960.468	0.534881	24.8295	0
SQnDTVTPDVWYTSKPK	2	Q9BTY2	N3(Deamidated)	0	7.315e-08	67.05	2.63318e-06	2	1966.94	1.82588	25.649	0
ATGTAHFFNFLLnTTDYR	2	Q13275	N13(Deamidated)	0	8.339e-10	57.58	2.33067e-05	3	2090	-0.267814	39.4648	0
IDSTGnVTNELR	1	O75882	N6(Deamidated)	0	5.449e-06	86.84	3.06381e-08	2	1319.64	0.214654	23.3219	0
GIcnSSDVR	1	O75882	C3(Carbamidomethyl); N4(Deamidated)	0	0.001763	32.99	0.0029387	2	1008.44	0.346867	13.9139	0
HLnGTITAK	1	Q6YHK3	N3(Deamidated)	0	2.24e-06	55.96	1.72389e-05	2	955.521	0.682981	10.3431	0
FLVTAPGIIRPGGnVTIGVELLEHcPSQVTVK	2	Q6YHK3	N14(Deamidated); C25(Carbamidomethyl)	0	4.049e-11	36.29	0.00111608	3	3402.85	1.29521	41.2798	0
GNPYSDLGnHTTcR	2	Q4KMQ2	N9(Deamidated); C13(Carbamidomethyl)	0	3.902e-07	71.56	1.95505e-07	2	1592.68	0.988564	17.3356	0
LnITcESSKK	1	Q4KMQ2	N2(Deamidated); C5(Carbamidomethyl)	0	0.0002564	30.84	0.0136807	2	1180.59	1.20253	13.034	1
YnSTIQESLHR	2	Q9BYE2	N2(Deamidated)	0	1.535e-05	72.25	8.75623e-07	2	1348.65	0.196019	18.4165	0
LKVPLDLNAFDVQASPNEGFVNQnITIFYR	1	Q12891	N24(Deamidated)	0	1.158e-10	78.01	2.01609e-07	3	3423.76	1.79459	48.5342	1
TYnGTNPDAASR	1	O60637	N3(Deamidated)	0	4.256e-07	76.63	8.90807e-08	2	1267.56	0.675656	13.065	0
nQSVPLSccR	1	O60637	N1(Deamidated); C8(Carbamidomethyl); C9(Carbamidomethyl)	0	0.004127	42.34	0.000245047	2	1221.54	1.07181	20.399	0
GRPnITHAVPK	2	P09529	N4(Deamidated)	0	1.016e-05	46.77	0.000277699	3	1190.66	0.2129	14.041	0
SAAGLPIAPcGAIANSLFnDSFSLWHQR	1	Q3MIR4	C10(Carbamidomethyl); N19(Deamidated)	0	4.16e-11	66.91	3.63612e-06	3	3001.46	-1.65438	47.6046	0
SLVDIDLSSLRDPAGIFELVEVVGnGTYGQVYK	1	O95819	N25(Deamidated)	0	0.0001558	28.75	0.0160023	3	3554.84	3.02353	54.8607	1
SDLNPAnGSYPFQALR	1	Q8NHP8	N7(Deamidated)	0	1.027e-06	56.57	3.27135e-05	2	1750.84	1.09717	35.8041	0
SIVYScEWPLYMWPFQKPnYTEIR	1	P06280	C6(Carbamidomethyl); N19(Deamidated)	0	2.839e-11	24.28	0.0509486	3	3108.46	0.027301	47.2966	0
NYFHYnQSYPPTYNVK	1	P38571	N6(Deamidated)	0	3.556e-07	35.49	0.00241527	3	2035.92	0.846236	25.9547	0
NLnMSR	1	P38571	N3(Deamidated)	0.004	0.1438	29.44	0.0138222	2	735.345	-0.569798	12.5042	0
NLnmSR	1	P38571	N3(Deamidated); M4(Oxidation)	0.005	0.1562	13.28	0.288985	2	751.337	-3.94416	4.88267	0
IVASDSGKPSLnQTALVR	1	Q9HC56	N12(Deamidated)	0	3.93e-09	68.15	1.84496e-06	3	1857.01	1.15967	23.4796	0
YIISPInGTVYLSEKDPVNTK	1	Q9HC56	N7(Deamidated)	0	7.607e-10	38.65	0.00161703	3	2352.24	3.28441	34.7512	1
THnLTDLSPHLR	1	P32004	N3(Deamidated)	0	2.697e-09	66.09	4.42866e-06	3	1404.72	-0.12372	21.3666	0
LLFPTnSSSHLVALQGQPLVLEcIAEGFPTPTIK	1	P32004	N6(Deamidated); C23(Carbamidomethyl)	0	7.746e-11	36.85	0.00154904	3	3678.95	0.955261	51.4373	0
FFPYAnGTLGIR	1	P32004	N6(Deamidated)	0	0.001485	30.6	0.010408	2	1356.69	-1.14578	37.1808	0
TLnSSGLPFGSYTFEKDFSR	1	Q9UHN6	N3(Deamidated)	0	2.569e-07	43.82	0.000703347	3	2254.07	1.56209	37.0794	1
NnISLVK	1	Q9UHN6	N2(Deamidated)	0.001	0.05273	60.37	1.41882e-05	2	788.451	0.0814813	19.6209	0
TTnSSAADPR	1	Q9UHN6	N3(Deamidated)	0.004	0.1278	28.35	0.00965037	2	1020.46	-0.908134	6.3654	0
VncSVYVQLEK	1	O43688	N2(Deamidated); C3(Carbamidomethyl)	0	2.004e-08	80.91	9.60989e-08	2	1339.66	0.475234	26.7647	0
FLVNVGQFnLSGALGTR	1	P01266	N9(Deamidated)	0	1.445e-09	85.25	4.06012e-08	2	1793.96	0.934837	45.2481	0
AFMnGSALEHVVEFGLDYPEGMAVDWLGK	1	O75581	N4(Deamidated)	0	2.289e-06	18.37	0.192848	3	3183.49	1.86712	54.0469	0
nGSLFAFR	1	P04004	N1(Deamidated)	0	0.002168	48.15	0.000136267	2	912.458	0.209177	34.5323	0
THAnGSIKR	1	Q07954	N4(Deamidated)	0.003	0.1058	29.97	0.0095155	2	984.523	0.542742	3.22891	1
QSTHSIYMFFnTSELR	1	P01137	N11(Deamidated)	0	2.783e-10	70.79	9.29555e-07	3	1961.91	-0.478978	34.6158	0
LASPPSQGEVPPGPLPEAVLALYnSTR	1	P01137	N24(Deamidated)	0	1.659e-10	30.54	0.0124956	3	2761.44	0.932928	48.5465	0
YSnNSWR	1	P01137	N3(Deamidated)	0.002	0.07827	19.8	0.0261782	2	927.396	0.348597	15.018	0
SVNPnDTcLAScVK	2	O95857	N5(Deamidated); C8(Carbamidomethyl); C12(Carbamidomethyl)	0	0.0003895	61.58	3.89214e-06	2	1565.7	1.04149	22.5438	0
QGSGnTTVTR	1	O15440	N5(Deamidated)	0	0.0001745	76.1	3.43659e-07	2	1021.49	0.334057	6.91001	0
LRAnQSWEDSNTDLVPAPAVR	1	Q99988	N4(Deamidated)	0	3.137e-06	74.34	7.04967e-07	3	2340.16	1.49342	30.5453	1
ncScQcEDNRGPK	1	P26012	N1(Deamidated); C2(Carbamidomethyl); C4(Carbamidomethyl); C6(Carbamidomethyl)	0	3.238e-05	13.1	0.0488619	3	1625.61	0.884048	5.95974	1
DLNEDDHHHEcLnVTQLLK	2	Q9ULF5	C11(Carbamidomethyl); N13(Deamidated)	0	7.325e-09	47.73	0.000186364	3	2331.07	2.55286	29.0881	0
nTTEVVNTMcGYK	1	O95858	N1(Deamidated); C10(Carbamidomethyl)	0	3.011e-05	62.09	2.81197e-06	2	1517.66	0.930302	26.6589	0
NAnATTLSYLVTGLKPnTLYEFSVMVTK	1	Q92859	N3(Deamidated); N17(Deamidated)	0	3.035e-11	72.31	6.93237e-07	3	3077.6	8.42413	49.2337	0
FnHTQTIQQK	1	Q92823	N2(Deamidated)	0	8.211e-09	71.53	1.04406e-06	2	1245.62	0.574093	9.65322	0
SNAPLVnVTLYYEALcGGcR	1	P13284	N7(Deamidated); C16(Carbamidomethyl); C19(Carbamidomethyl)	0	3.273e-11	71.49	8.86972e-07	2	2258.06	-0.623136	46.4328	0
TGAFSMPEVNVDYnASSETLR	1	Q7Z7D3	N14(Deamidated)	0	9.686e-09	71.18	8.26856e-07	2	2289.04	3.26958	37.7425	0
AAGnTSESQScAR	1	Q86WC4	N4(Deamidated); C11(Carbamidomethyl)	0	2.61e-06	68.81	2.69621e-07	2	1339.55	0.293977	4.57587	0
FVnDTKDKR	1	P78536	N3(Deamidated)	0	2.64e-06	53.35	6.77388e-05	2	1123.57	0.433732	5.49537	2
cQEAInATcK	1	P78536	C1(Carbamidomethyl); N6(Deamidated); C9(Carbamidomethyl)	0	7.204e-07	36.51	0.000882261	2	1195.51	0.809339	13.4815	0
NnLTTYK	1	P48740	N2(Deamidated)	0.002	0.0636	61.14	5.76848e-06	2	854.426	0.529694	14.7459	0
LRPHFLSVcnPDFSQIncSEGYIQNYR	1	O14495	C9(Carbamidomethyl); N10(Deamidated); N17(Deamidated); C18(Carbamidomethyl)	0	1.448e-13	66.15	3.28806e-06	3	3316.54	7.02961	32.9337	0
YSLnVTYNYPVHYFDGR	1	Q9NV96	N4(Deamidated)	0	1.275e-11	65.04	3.14895e-06	3	2108.97	-1.7515	34.6117	0
SAEGTFFInKTEIEDFPR	1	P06865	N9(Deamidated)	0	4.002e-10	64.59	4.29207e-06	3	2102.01	0.323359	35.1283	1
SAEGTFFInKTEIEDFPRFPHR	1	P06865	N9(Deamidated)	0	8.588e-06	18.29	0.234979	4	2639.29	-1.12373	32.2106	2
KDnITAHNISWR	1	Q9Y6M7	N3(Deamidated)	0	2.283e-06	49.5	0.000158205	3	1455.73	0.499068	18.6526	1
MWDnLTcWPATPR	1	P32241	N4(Deamidated); C7(Carbamidomethyl)	0	8.802e-08	63.35	2.24255e-06	2	1648.73	0.541167	39.4875	0
LDSFGPINPTLnTTYSFLTTFFK	1	P07686	N12(Deamidated)	0	9.915e-06	43.53	0.000767443	2	2625.32	2.57191	55.4862	0
MTPNLLHLAPENFYISHSPnSTAGPScTLLEEAFRR	1	P07686	N20(Deamidated); C27(Carbamidomethyl)	0	1.767e-08	16.9	0.313407	4	4071.98	1.75586	39.3246	1
EASQnITYIcK	1	P05997	N5(Deamidated); C10(Carbamidomethyl)	0	8.48e-08	60.3	8.30596e-06	2	1327.62	1.22494	22.2279	0
LNPGnYTAR	1	P08069	N5(Deamidated)	0	0.001852	46.59	0.000324535	2	1006.5	0.0800716	18.4145	0
TnASVPSIPLDVLSASnSSSQLIVK	1	P08069	N2(Deamidated); N17(Deamidated)	0	4.569e-06	30.34	0.0127146	2	2529.34	2.26912	47.442	0
NLnVTSLGFR	1	P21860	N3(Deamidated)	0	0.0003357	43.04	0.00080448	2	1121.6	0.127561	33.5323	0
nVTHLLQQELTEAQK	1	Q10589	N1(Deamidated)	0	4.61e-11	58.96	1.6581e-05	2	1752.92	2.04805	34.3185	0
SFDDHFQHLLnDSER	1	P35052	N11(Deamidated)	0	9.466e-09	45.35	0.000176504	2	1860.81	-0.15938	28.3822	0
IcPQGYTccTSEMEENLAnRSHAELETALR	1	P35052	C2(Carbamidomethyl); C8(Carbamidomethyl); C9(Carbamidomethyl); N19(Deamidated)	0	5.55e-09	33.24	0.00184954	4	3541.55	1.26894	31.1947	1
EEQFnSTYR	1	P01861	N5(Deamidated)	0	0.005084	57.83	4.20281e-06	2	1174.5	0.319406	18.1054	0
TKPREEQFnSTYR	1	P01861	N9(Deamidated)	0.001	0.01948	13.62	0.543138	3	1656.8	-0.389956	11.059	1
HTGNVVITncSAAHSR	2	Q8NES3	N9(Deamidated); C10(Carbamidomethyl)	0	1.871e-08	51.24	8.83157e-05	3	1724.81	0.127811	12.827	0
GLSPGnYSVR	1	P06213	N6(Deamidated)	0	0.001969	56.44	3.27995e-05	2	1050.52	0.391124	21.3981	0
LNAInITSALDR	1	O43556	N5(Deamidated)	0	1.294e-05	54.75	5.45994e-05	2	1301.71	0.534174	36.0211	0
GGSYVALTDGLGnLTIIIETMSHK	1	P54803	N13(Deamidated)	0	2.708e-13	54.68	6.24649e-05	3	2491.28	0.792106	52.9193	0
GFnATYHVR	1	Q7Z4F1	N3(Deamidated)	0	0.002077	52	7.76078e-05	2	1065.51	0.0288758	17.4759	0
FISPFTQFnITR	1	Q8IZP7	N9(Deamidated)	0	2.702e-05	51.02	0.000108718	2	1471.76	0.453397	41.4916	0
DcScIPQnLSSGFGHATAGK	1	Q96BD0	C2(Carbamidomethyl); C4(Carbamidomethyl); N8(Deamidated)	0	6.526e-09	50.92	5.9064e-05	3	2107.92	-0.16653	28.2114	0
SWPAVGncSSALR	1	P02790	N7(Deamidated); C8(Carbamidomethyl)	0	6.295e-05	50.72	8.38755e-05	2	1405.65	0.564024	26.7323	0
AInDTAAR	1	Q02487	N3(Deamidated)	0	0.01151	50.56	0.000104604	2	832.416	-0.398025	9.35289	0
AnYTILK	1	Q02487	N2(Deamidated)	0.001	0.05372	16.08	0.161526	2	823.456	-0.56388	22.3487	0
LSGnLTLLR	1	Q9UIW2	N4(Deamidated)	0	0.005321	50.52	7.89569e-05	2	987.584	1.10565	29.9505	0
ADGTVNQIEGEATPVnLTEPAKLEVK	1	P05090	N16(Deamidated)	0	2.255e-10	49.44	0.000197947	3	2724.4	0.432176	33.5303	1
RnQSLSLLYK	1	Q06481	N2(Deamidated)	0	0.0003184	40.79	0.000791997	2	1222.68	0.862049	22.2612	1
TSADLDRETVPEYnLSITAR	1	Q9UN70	N14(Deamidated)	0	1.871e-11	45.58	0.000484215	3	2252.1	-0.0662675	30.4283	1
nVScLWcNTNK	1	P53801	N1(Deamidated); C4(Carbamidomethyl); C7(Carbamidomethyl)	0	0.0001446	47.23	7.00167e-05	2	1396.6	0.692778	28.5953	0
VWcLGnETR	1	Q9Y6N7	C3(Carbamidomethyl); N6(Deamidated)	0	0.001037	36.2	0.00227889	2	1135.52	0.167298	24.8147	0
SLVnSSDK	1	Q92187	N4(Deamidated)	0	0.005483	44.55	0.000478776	2	850.415	0.194696	10.6408	0
MYnGSccR	1	Q9BXC0	N3(Deamidated); C6(Carbamidomethyl); C7(Carbamidomethyl)	0	0.001818	25.94	0.0025408	2	1048.36	0.362911	9.39009	0
LWnFTMNAK	1	Q86SQ4	N3(Deamidated)	0	0.004728	30.39	0.00813561	2	1125.54	-0.176733	33.0252	0
EANEVANQILnLTADGQnLTSAnITNIVEQVKR	1	Q86SQ4	N11(Deamidated); N18(Deamidated); N23(Deamidated)	0	4.355e-08	24.21	0.054242	3	3583.81	0.289711	48.9911	1
VGHEDSDWTAFSYSnASFTQLLSFGK	1	Q86SQ4	N15(Deamidated)	0	3.439e-06	21.67	0.0738635	3	2895.32	3.60095	47.6847	0
GFnASYIR	1	Q86SQ4	N3(Deamidated)	0.001	0.05677	28.34	0.00872001	2	928.452	0.110805	23.3702	0
SHnRSEEFLIAGK	1	P01033	N3(Deamidated)	0	1.844e-07	43.94	0.00065996	2	1488.75	1.22383	17.9869	1
nATTPLWR	1	O75954	N1(Deamidated)	0.001	0.04094	42.66	0.000883461	2	959.495	0.770777	27.6614	0
LLPVQFLcPnISVAYR	1	P07949	C8(Carbamidomethyl); N10(Deamidated)	0	8.549e-07	42.55	0.000661526	2	1891.02	2.64916	46.6212	0
VFPQVnVTK	1	P54802	N6(Deamidated)	0	0.002562	36.39	0.00371976	2	1032.57	0.91476	25.486	0
ELKLnASLPALLLIR	1	Q15904	N5(Deamidated)	0	2.68e-05	34.53	0.000352371	3	1665.03	-0.713496	45.5452	1
NMQIAnHTLK	1	P12821	N6(Deamidated)	0	4.436e-06	34.28	0.00363919	2	1170.59	0.883987	16.8574	0
GWnWTSGFNK	1	P15328	N3(Deamidated)	0	7.178e-05	34.26	0.0020811	2	1197.53	0.508782	33.1598	0
FTFTSHTPGEHQIcLHSnSTK	1	Q9BVK6	C14(Carbamidomethyl); N18(Deamidated)	0	4.182e-13	27.89	0.0168244	3	2430.12	1.53278	20.2278	0
GFQWVTGDNnTSYSR	2	P07204	N10(Deamidated)	0	1.381e-07	32.71	0.00246466	2	1732.76	1.37655	30.0518	0
SnFTLTAAR	1	Q68D85	N2(Deamidated)	0	0.0004322	32.19	0.00640186	2	981.5	0.0206814	22.8761	0
KLnVTTAWK	1	Q9BZM5	N3(Deamidated)	0	0.001205	28.74	0.0152372	2	1061.6	3.59221	21.0091	1
FNPnISWQPIPVHTVPITEDR	1	P11117	N4(Deamidated)	0	2.754e-08	27.27	0.0309374	3	2461.26	2.89957	37.8892	0
LDPVSLQTLQTWnTSYPKR	1	Q99784	N13(Deamidated)	0	1.532e-06	26.68	0.0413457	3	2248.16	0.147098	35.8868	1
LISnATR	1	Q96NI6	N4(Deamidated)	0	0.01193	26.15	0.042223	2	775.43	-0.685877	13.1646	0
LHNQLLPnVTTVER	1	Q14390	N8(Deamidated)	0	0.0006154	25.69	0.032238	2	1634.88	-2.2102	27.1107	0
nISGHIYNQnVSQK	1	Q9P0T7	N1(Deamidated); N10(Deamidated)	0	0.0001947	25.65	0.0306304	2	1603.77	1.555	19.5128	0
nTTYcSK	1	Q9NPH3	N1(Deamidated); C5(Carbamidomethyl)	0.001	0.01722	21.09	0.00776194	2	874.361	-0.197656	5.47674	0
LQPVRGnETLR	2	Q99500	N7(Deamidated)	0	0.006138	16.99	0.163989	2	1283.71	1.6363	16.1808	1
LSRnETQVDGAR	1	Q9NYQ6	N4(Deamidated)	0	3.384e-05	22.13	0.0946081	2	1346.67	0.720606	9.7323	1
HNIIPIFAVTnYSYSYYEK	1	P16144	N11(Deamidated)	0	8.307e-07	16.1	0.423437	3	2323.13	1.388	39.8879	0
NnLcPSGSNIISNLFKEDcHQK	10	P60033	N2(Deamidated); C4(Carbamidomethyl); C19(Carbamidomethyl)	0	4.565e-08	39.65	0.00131155	4	2576.19	0.574453	34.7979	1
IISAnGcKVDNSSLTGESEPQTR	3	P05023	N5(Deamidated); C7(Carbamidomethyl)	0	2.415e-10	79.53	1.62687e-07	3	2464.17	1.56541	21.6497	1
cVEESGSAHcVcPMLTcPEAnATKVcGSDGVTYGNEcQLK	1	O00468	C1(Carbamidomethyl); C10(Carbamidomethyl); C12(Carbamidomethyl); C17(Carbamidomethyl); N21(Deamidated); C26(Carbamidomethyl); C37(Carbamidomethyl)	0	6.747e-15	58.82	2.42757e-06	4	4476.87	0.968431	28.5483	1
NPcTSEQncTSPFSYK	1	P05556	C3(Carbamidomethyl); N8(Deamidated); C9(Carbamidomethyl)	0	4.879e-14	117.06	1.96789e-12	2	1920.77	0.289655	22.9716	0
LRNPcTSEQncTSPFSYK	2	P05556	C5(Carbamidomethyl); N10(Deamidated); C11(Carbamidomethyl)	0	5.51e-10	102.13	4.04151e-10	3	2189.96	0.773186	21.3789	1
mREcISIHVGQAGVQIGnAcWELYcLEHGIQPDGQMPSDK	1	Q71U36;Q9BQE3	M1(Oxidation); C4(Carbamidomethyl); N18(Deamidated); C20(Carbamidomethyl); C25(Carbamidomethyl)	0	0.000227	12.18	0.544807	4	4601.1	5.43295	36.6281	1
VNncSDMcFHQK	2	Q92626	N3(Deamidated); C4(Carbamidomethyl); C8(Carbamidomethyl)	0	9.955e-09	74.75	3.34172e-08	2	1540.6	2.46968	14.7275	0
RVNncSDMcFHQK	3	Q92626	N4(Deamidated); C5(Carbamidomethyl); C9(Carbamidomethyl)	0	6.881e-10	41.72	0.000141325	3	1696.7	1.23629	10.4971	1
mREcISIHVGQAGVQIGnAcWELYcLEHGIQPDGQMPSDK	1	Q71U36;Q9BQE3	M1(Oxidation); C4(Carbamidomethyl); N18(Deamidated); C20(Carbamidomethyl); C25(Carbamidomethyl)	0	0.000227	12.18	0.544807	4	4601.1	5.43295	36.6281	1
AIHYALnccGLAGGVEQFISDIcPK	6	P21926	N7(Deamidated); C8(Carbamidomethyl); C9(Carbamidomethyl); C23(Carbamidomethyl)	0	2.644e-10	108.31	1.90366e-10	2	2794.31	3.23736	44.4048	0
AcTEAEFAcHSYnEcVALEYR	1	P98160	C2(Carbamidomethyl); C9(Carbamidomethyl); N13(Deamidated); C15(Carbamidomethyl)	0	1.126e-07	31.56	0.000733144	3	2581.04	0.434398	28.3609	0
GPMNQcLVATGTHEPKnQSYMVR	2	Q03405	C6(Carbamidomethyl); N17(Deamidated)	0	3.089e-16	58.17	1.78314e-05	3	2619.22	1.50955	21.8465	1
GPmNQcLVATGTHEPKnQSYMVR	1	Q03405	M3(Oxidation); C6(Carbamidomethyl); N17(Deamidated)	0	1.388e-07	13.43	0.460751	4	2635.21	0.437107	20.2093	1
TFKnESENTcQDVDEcQQNPR	2	P48960	N4(Deamidated); C10(Carbamidomethyl); C16(Carbamidomethyl)	0	3.73e-15	95.35	5.1055e-10	3	2600.07	2.6714	16.4719	1
FQSSAVMALQEAcEAYLVGLFEDTnLcAIHAK	1	P68431	C13(Carbamidomethyl); N25(Deamidated); C27(Carbamidomethyl)	0	8.575e-06	13.7	0.550288	4	3587.7	4.29389	52.8411	0
LNEASFQPPPGVnIcDVNWK	1	Q16563	N13(Deamidated); C15(Carbamidomethyl)	0	6.582e-07	47.72	0.000281458	2	2286.09	0.932188	39.4199	0
HPVnEcAPYQR	1	Q3MIR4	N4(Deamidated); C6(Carbamidomethyl)	0	3.28e-05	45.82	0.000153164	2	1371.61	1.2155	13.5878	0
NLnccGFR	1	O95857	N3(Deamidated); C4(Carbamidomethyl); C5(Carbamidomethyl)	0	0.006581	25.72	0.00763563	2	1041.42	0.0139851	18.768	0

## Sheet: MDA-MB-231-Exo
Sequence	# PSMs	Protein Group Accessions	Modifications	q-Value	PEP	IonScore	Exp Value	Charge	MH+ [Da]	ΔM [ppm]	RT [min]	# Missed Cleavages
LDAPTNLQFVnETDSTVLVR	10	P02751	N11(Deamidated)	0	2.979e-10	104.91	5.98886e-10	3	2233.14	0.369854	42.969	0
DQcIVDDITYNVnDTFHK	3	P02751	C3(Carbamidomethyl); N13(Deamidated)	0	2.375e-13	100.51	6.58009e-10	3	2197.97	0.678271	38.2971	0
ESKPLTAQQTTKLDAPTNLQFVnETDSTVLVR	2	P02751	N23(Deamidated)	0	8.094e-16	99.34	1.071e-09	3	3545.85	3.98553	35.0051	1
HEEGHmLncTcFGQGR	2	P02751	M6(Oxidation); N8(Deamidated); C9(Carbamidomethyl); C11(Carbamidomethyl)	0	2.235e-12	98.93	1.40732e-10	2	1949.77	2.58543	16.9432	0
GGNSnGALcHFPFLYNNHnYTDcTSEGR	6	P02751	N5(Deamidated); C9(Carbamidomethyl); N19(Deamidated); C23(Carbamidomethyl)	0	4.446e-13	89.74	2.22956e-09	3	3204.33	4.56536	32.2443	0
DQcIVDDITYNVnDTFHKR	3	P02751	C3(Carbamidomethyl); N13(Deamidated)	0	1.047e-12	80.84	1.04253e-07	2	2354.08	4.87164	34.1287	1
LDAPTnLQFVnETDSTVLVR	1	P02751	N6(Deamidated); N11(Deamidated)	0	4.374e-07	76.36	4.40448e-07	3	2234.14	7.82464	44.096	0
RHEEGHMLncTcFGQGR	3	P02751	N9(Deamidated); C10(Carbamidomethyl); C12(Carbamidomethyl)	0	3.821e-11	76.29	6.10905e-08	2	2089.88	3.05278	18.0448	1
HEEGHMLncTcFGQGR	3	P02751	N8(Deamidated); C9(Carbamidomethyl); C11(Carbamidomethyl)	0	2.337e-12	75.37	3.48483e-08	2	1933.78	2.50226	20.3071	0
GGNSNGALcHFPFLYNNHnYTDcTSEGR	2	P02751	C9(Carbamidomethyl); N19(Deamidated); C23(Carbamidomethyl)	0	7.054e-16	69.32	2.22205e-07	3	3203.34	2.16827	30.6643	0
GGNSnGALcHFPFLYNnHnYTDcTSEGR	4	P02751	N5(Deamidated); C9(Carbamidomethyl); N17(Deamidated); N19(Deamidated); C23(Carbamidomethyl)	0	1.677e-08	62.14	6.72036e-07	3	3205.31	3.76195	36.1439	0
RHEEGHmLncTcFGQGR	3	P02751	M7(Oxidation); N9(Deamidated); C10(Carbamidomethyl); C12(Carbamidomethyl)	0	2.786e-13	60.29	2.66591e-06	3	2105.87	0.887513	15.1377	1
GGNSNGALcHFPFLYNnHnYTDcTSEGRR	5	P02751	C9(Carbamidomethyl); N17(Deamidated); N19(Deamidated); C23(Carbamidomethyl)	0	1.047e-13	24	0.0101517	4	3360.43	4.3175	28.9484	1
GGNSnGALcHFPFLYNnHnYTDcTSEGRR	1	P02751	N5(Deamidated); C9(Carbamidomethyl); N17(Deamidated); N19(Deamidated); C23(Carbamidomethyl)	0	1.527e-06	20.75	0.0168279	4	3361.41	1.15468	32.0394	1
NSITLTnLTPGTEYVVSIVALnGREESPLLIGQQSTVSDVPR	1	P02751	N7(Deamidated); N22(Deamidated)	0	0.0002068	14.17	0.189498	3	4470.36	8.10673	48.9574	1
EPGSnVTMSVDAEcVPMVR	2	Q08380	N5(Deamidated); C14(Carbamidomethyl)	0	1.936e-13	113.38	3.16847e-11	2	2078.92	2.68936	36.0485	0
TVIRPFYLTnSSGVD	5	Q08380	N10(Deamidated)	0	2.385e-07	94.58	5.93915e-09	2	1669.85	3.11344	37.4328	0
IRFPMMLPEELFELQFnLSLYWSHEALFQKK	2	Q08380	N17(Deamidated)	0	2.535e-16	93.79	4.99307e-09	3	3885.97	-0.0995576	54.5117	2
ALGFEnATQALGR	9	Q08380	N6(Deamidated)	0	5.545e-10	91.54	1.2556e-08	2	1348.69	2.14791	32.7962	0
YKGLnLTEDTYKPR	6	Q08380	N5(Deamidated)	0	1.333e-09	82.86	8.59227e-08	2	1698.87	1.09033	22.9631	1
AAIPSALDTnSSK	3	Q08380	N10(Deamidated)	0	4.213e-05	80.01	1.736e-07	2	1275.65	4.11518	24.7632	0
IRFPMMLPEELFELQFnLSLYWSHEALFQK	11	Q08380	N17(Deamidated)	0	4.793e-13	77.35	2.43902e-07	3	3757.89	3.95732	57.3513	1
FPMMLPEELFELQFnLSLYWSHEALFQK	4	Q08380	N15(Deamidated)	0	2.535e-16	71.08	1.23213e-06	3	3488.7	1.32618	56.8399	0
GLnLTEDTYKPR	8	Q08380	N3(Deamidated)	0	3.489e-06	70.05	1.59157e-06	2	1407.71	2.15799	23.9821	0
HERDAGVVcTnETR	3	Q08380	C9(Carbamidomethyl); N11(Deamidated)	0	2.37e-10	67.99	1.10404e-06	2	1644.74	-0.0631215	12.5565	1
DAGVVcTnETR	6	Q08380	C6(Carbamidomethyl); N8(Deamidated)	0	2.741e-06	64.34	2.13515e-06	2	1222.54	0.109284	19.7269	0
ALMLcEGLFVADVTDFEGWKAAIPSALDTnSSK	1	Q08380	C5(Carbamidomethyl); N30(Deamidated)	0	1.813e-14	59.43	1.73318e-05	3	3557.72	-0.0142239	54.1265	1
FPMMLPEELFELQFnLSLYWSHEALFQKK	7	Q08380	N15(Deamidated)	0	2.535e-16	50.46	0.000137173	3	3616.79	0.705638	55.3483	1
AAIPSALDTnSSKSTSSFPcPAGHFnGFR	2	Q08380	N10(Deamidated); C20(Carbamidomethyl); N26(Deamidated)	0	1.756e-12	46.95	0.00023514	4	3026.4	2.39066	32.599	1
EPGSnVTmSVDAEcVPMVR	2	Q08380	N5(Deamidated); M8(Oxidation); C14(Carbamidomethyl)	0	1.546e-05	42.38	0.000312172	2	2094.92	2.88188	33.3554	0
FPmMLPEELFELQFnLSLYWSHEALFQKK	2	Q08380	M3(Oxidation); N15(Deamidated)	0	6.242e-12	40.53	0.00139848	4	3632.78	-0.337592	54.7474	1
SNcRHERDAGVVcTnETR	2	Q08380	C3(Carbamidomethyl); C13(Carbamidomethyl); N15(Deamidated)	0	5.486e-06	39.78	0.000583839	4	2161.95	0.528737	11.881	2
IRFPMmLPEELFELQFnLSLYWSHEALFQK	2	Q08380	M6(Oxidation); N17(Deamidated)	0	9.145e-12	32.43	0.00817214	4	3773.88	0.99856	55.221	1
FPmMLPEELFELQFnLSLYWSHEALFQK	2	Q08380	M3(Oxidation); N15(Deamidated)	0	9.66e-12	28.71	0.0205244	3	3504.69	0.820528	56.5702	0
DAGVVcTnETRSTHTLDLSR	1	Q08380	C6(Carbamidomethyl); N8(Deamidated)	0	0.0003001	15.24	0.405452	3	2233.05	1.35967	23.8761	1
dDDIAALVVDnGSGMcK	2	P60709	N-Term(Acetyl); N11(Deamidated); C16(Carbamidomethyl)	0	2.128e-08	64.93	2.3299e-06	2	1822.79	2.42656	52.2576	0
eEEIAALVIDnGSGMcK	2	P63261	N-Term(Acetyl); N11(Deamidated); C16(Carbamidomethyl)	0	1.714e-11	45.16	0.00028955	2	1878.85	0.156892	53.6644	0
NKGcSSSTSVLLTLDNNVVnGSSPAIR	2	P07996	C4(Carbamidomethyl); N20(Deamidated)	0	2.535e-16	135.73	4.74459e-13	2	2791.39	1.75872	34.2643	1
GcSSSTSVLLTLDNNVVnGSSPAIR	2	P07996	C2(Carbamidomethyl); N18(Deamidated)	0	1.437e-12	126.62	4.09409e-12	2	2549.26	2.1976	40.2592	0
GcSSSTSVLLTLDNnVVnGSSPAIR	2	P07996	C2(Carbamidomethyl); N15(Deamidated); N18(Deamidated)	0	4.462e-10	98.08	2.78518e-09	2	2550.25	6.16679	41.3287	0
NKGcSSSTSVLLTLDnNVVnGSSPAIR	2	P07996	C4(Carbamidomethyl); N16(Deamidated); N20(Deamidated)	0	1.488e-09	88.96	2.49033e-08	2	2792.38	1.4495	35.2587	1
VScPImPcSnATVPDGEccPR	1	P07996	C3(Carbamidomethyl); M6(Oxidation); C8(Carbamidomethyl); N10(Deamidated); C18(Carbamidomethyl); C19(Carbamidomethyl)	0	4.184e-10	82.07	6.19398e-09	2	2423.98	2.84875	26.5756	0
VVnSTTGPGEHLR	4	P07996	N3(Deamidated)	0	4.094e-08	80.66	1.33147e-07	3	1367.69	1.41531	16.3105	0
KVScPIMPcSnATVPDGEccPR	2	P07996	C4(Carbamidomethyl); C9(Carbamidomethyl); N11(Deamidated); C19(Carbamidomethyl); C20(Carbamidomethyl)	0	3.219e-13	74.77	1.16699e-07	2	2536.08	2.93218	25.538	1
VVnSTTGPGEHLRnALWHTGNTPGQVR	2	P07996	N3(Deamidated); N14(Deamidated)	0	2.535e-16	72.75	9.13121e-07	3	2900.44	1.74702	24.6889	1
KVScPImPcSnATVPDGEccPR	1	P07996	C4(Carbamidomethyl); M7(Oxidation); C9(Carbamidomethyl); N11(Deamidated); C19(Carbamidomethyl); C20(Carbamidomethyl)	0	9.742e-11	66.35	6.95218e-07	3	2552.07	0.620089	23.0541	1
VScPIMPcSnATVPDGEccPR	2	P07996	C3(Carbamidomethyl); C8(Carbamidomethyl); N10(Deamidated); C18(Carbamidomethyl); C19(Carbamidomethyl)	0	1.123e-10	49.88	1.64483e-05	3	2407.99	1.94167	29.8802	0
cEcKPGYAGNGIIcGEDTDLDGWPNENLVcVAnATYHcKK	1	P07996	C1(Carbamidomethyl); C3(Carbamidomethyl); C14(Carbamidomethyl); C30(Carbamidomethyl); N33(Deamidated); C38(Carbamidomethyl)	0	8.593e-12	27.51	0.00541128	4	4587.01	7.27401	35.0422	1
SLTQGSLIVGDLAPVnGTSQGK	2	P98160	N16(Deamidated)	0	7.323e-15	93.91	5.75117e-09	2	2143.13	2.10086	38.5933	0
SQGLNLHTLLYLGGVEPSVPLSPATnMSAHFR	2	P98160	N26(Deamidated)	0	2.202e-15	83.3	6.50152e-08	3	3407.75	2.79909	44.6138	0
NLHQSnTSRAELLVTEAPSKPITVTVEEQR	2	P98160	N6(Deamidated)	0	2.535e-16	75	3.11484e-07	3	3348.75	2.79125	28.2508	1
IQGEEIVFHDLnLTAHGISHcPTcR	2	P98160	N12(Deamidated); C21(Carbamidomethyl); C24(Carbamidomethyl)	0	4.228e-14	72.96	8.44727e-07	3	2905.38	1.91829	31.7953	0
VEnGSGPK	1	P98160	N3(Deamidated)	0	0.0009072	44.26	0.000155614	2	788.379	0.0117997	5.36461	0
GVnVTMPAQPGTPPLSSTQLQIDPSLHEFQLVDLSR	1	P98160	N3(Deamidated)	0	4.609e-11	34.41	0.00412957	3	3873.98	1.80284	48.2015	0
NLHQSnTSR	1	P98160	N6(Deamidated)	0	1.486e-05	30.13	0.00611421	2	1057.5	-0.0137172	5.94088	0
SLTQGSLIVGDLAPVnGTSQGKFQGLDLnEELYLGGYPDYGAIPK	1	P98160	N16(Deamidated); N29(Deamidated)	0	6.882e-05	27.4	0.0174691	3	4697.39	7.47869	50.5131	1
FDQPDDFKGVnVTMPAQPGTPPLSSTQLQIDPSLHEFQLVDLSR	1	P98160	N11(Deamidated)	0	4.115e-09	22.18	0.0696142	4	4866.41	2.48621	48.5534	1
NQELEDNVHISPnGSIITIVGTRPSnHGTYR	1	P98160	N13(Deamidated); N26(Deamidated)	0	3.03e-05	19.12	0.194102	4	3420.69	3.18362	32.4425	0
nQELEDNVHISPnGSIITIVGTRPSnHGTYR	1	P98160	N1(Deamidated); N13(Deamidated); N26(Deamidated)	0	5.927e-05	17.4	0.285693	4	3421.69	8.06812	33.5082	0
NQELEDNVHISPnGSIITIVGTRPSNHGTYR	3	P98160	N13(Deamidated)	0	1.657e-07	15.87	0.383056	4	3419.7	2.15146	30.5686	0
cVASNAYGVAQSVVnLSVHGPPTVSVLPEGPVWVK	1	P98160	C1(Carbamidomethyl); N15(Deamidated)	0	5.002e-05	13.18	0.444776	3	3618.89	8.93957	53.6731	0
TRNQELEDNVHISPnGSIITIVGTRPSNHGTYR	1	P98160	N15(Deamidated)	0	6.625e-07	10.86	1.24693	4	3676.85	2.5	27.9512	1
ALVnFTR	1	P98160	N4(Deamidated)	0.001	0.05442	42.07	0.000822651	2	821.452	-0.0384871	26.723	0
LnTTGVSAGcTADLLVGR	1	O15230	N2(Deamidated); C10(Carbamidomethyl)	0	9.617e-14	132.81	1.02887e-12	2	1805.91	1.29333	35.7276	0
AQQLLAnSTALEEAMLQEQQR	2	O15230	N7(Deamidated)	0	3.982e-15	119.57	1.84381e-11	2	2373.18	1.7915	41.4093	0
VFDLQQNLGSVnVSTGcAPALQAQTPGLGPR	2	O15230	N12(Deamidated); C17(Carbamidomethyl)	0	9.103e-13	112.25	9.56038e-11	2	3196.62	4.14588	43.731	0
LVEAAEAHAQQLGQLALnLSSIILDVNQDR	2	O15230	N18(Deamidated)	0	1.441e-12	107.09	1.6221e-10	3	3230.72	4.47651	55.1196	0
GVHnASLALSASIGR	2	O15230	N4(Deamidated)	0	5.084e-12	96.61	3.13222e-09	2	1453.78	1.57278	26.116	0
TLSELMSQTGHLGLAnASAPSGEQLLR	1	O15230	N16(Deamidated)	0	2.535e-16	96.38	3.80889e-09	2	2782.41	2.45074	39.6965	0
DnATLQATLHAAR	1	O15230	N2(Deamidated)	0	1.618e-08	95.21	4.94133e-09	2	1382.7	0.081635	23.457	0
LLLGGLPESGTIYnFSGcISNVFVQR	2	O15230	N14(Deamidated); C18(Carbamidomethyl)	0	2.026e-13	89	2.24718e-08	3	2842.44	-0.0711519	53.4685	0
LnLTSPDLFWLVFR	1	O15230	N2(Deamidated)	0	7.653e-11	87.47	2.11291e-08	2	1721.93	-0.00130105	56.4699	0
KQELSRDnATLQATLHAAR	2	O15230	N8(Deamidated)	0	1.954e-14	84.81	4.72428e-08	3	2124.12	1.55094	20.548	2
RLnTTGVSAGcTADLLVGR	1	O15230	N3(Deamidated); C11(Carbamidomethyl)	0	8.271e-10	84.05	7.0839e-08	3	1962.01	-0.0529886	30.5276	1
LnASIADLQSQLR	1	O15230	N2(Deamidated)	0	1.808e-08	79.88	1.75277e-07	2	1429.77	0.325191	35.623	0
VWQGHAnASFcPHGYGcR	2	O15230	N7(Deamidated); C11(Carbamidomethyl); C17(Carbamidomethyl)	0	1.503e-11	64.63	8.78092e-07	3	2104.89	0.765557	20.9671	0
GInASSMAWAR	1	O15230	N3(Deamidated)	0	6.536e-06	64.47	3.89427e-06	2	1164.55	1.04063	28.9157	0
FGFNPLEFEnFSWR	1	O15230	N10(Deamidated)	0	1.236e-08	54.08	3.61528e-05	2	1790.82	0.506809	51.5796	0
LHRLnASIADLQSQLR	2	O15230	N5(Deamidated)	0	8.068e-12	53.68	3.21411e-05	2	1836.01	1.80456	29.1453	1
TQAGFADGAPHYVAFYSnATGVWLYVDDQLQQMKPHR	1	O15230	N18(Deamidated)	0	2.535e-16	53.03	5.6742e-05	4	4182.97	-0.846286	45.3034	0
LVEAAEAHAQQLGQLALnLSSIILDVNQDRLTQR	2	O15230	N18(Deamidated)	0	8.435e-10	52.69	2.47604e-05	4	3729	1.87597	53.6215	1
IVPLEnGEIVVSLVNGRPGAMnFSYSPLLR	3	O15230	N6(Deamidated); N22(Deamidated)	0	1.565e-07	40.36	0.000722553	3	3243.72	3.45415	51.2915	0
IVPLEnGEIVVSLVnGRPGAMnFSYSPLLR	1	O15230	N6(Deamidated); N15(Deamidated); N22(Deamidated)	0	1.043e-08	26.12	0.0266334	3	3244.69	-0.61223	53.1619	0
AVDRTLSELMSQTGHLGLAnASAPSGEQLLR	1	O15230	N20(Deamidated)	0	3.149e-07	21.43	0.114033	4	3223.64	1.39759	40.4884	1
IVPLENGEIVVSLVNGRPGAMnFSYSPLLR	1	O15230	N22(Deamidated)	0	1.737e-10	18.46	0.101931	3	3242.73	2.6669	49.1132	0
LRNPcTSEQncTSPFSYK	2	P05556	C5(Carbamidomethyl); N10(Deamidated); C11(Carbamidomethyl)	0	5.444e-15	108.5	9.32275e-11	3	2189.96	0.773186	22.9649	1
NPcTSEQncTSPFSYK	1	P05556	C3(Carbamidomethyl); N8(Deamidated); C9(Carbamidomethyl)	0	6.885e-11	106.62	2.50437e-11	2	1920.78	1.56071	24.5089	0
KDTcTQEcSYFnITKVESR	3	P05556	C4(Carbamidomethyl); C8(Carbamidomethyl); N12(Deamidated)	0	2.535e-16	103.67	3.30743e-10	3	2367.06	1.96937	25.8067	2
DTcTQEcSYFnITKVESR	2	P05556	C3(Carbamidomethyl); C7(Carbamidomethyl); N11(Deamidated)	0	5.504e-13	102.88	2.39581e-10	2	2238.97	2.46938	31.9474	1
KEnSSEIcSNNGEcVcGQcVcR	2	P05556	N3(Deamidated); C8(Carbamidomethyl); C14(Carbamidomethyl); C16(Carbamidomethyl); C19(Carbamidomethyl); C21(Carbamidomethyl)	0	1.032e-14	99.67	1.07639e-10	2	2648.03	2.70675	18.8144	1
KEnSSEIcSNnGEcVcGQcVcR	2	P05556	N3(Deamidated); C8(Carbamidomethyl); N11(Deamidated); C14(Carbamidomethyl); C16(Carbamidomethyl); C19(Carbamidomethyl); C21(Carbamidomethyl)	0	2.13e-14	92.45	5.67505e-10	3	2649.01	1.40767	19.7441	1
KDTcTQEcSYFnITK	2	P05556	C4(Carbamidomethyl); C8(Carbamidomethyl); N12(Deamidated)	0	5.006e-13	91.79	2.88064e-09	2	1895.82	2.48148	24.8281	1
NGVnGTGEnGR	1	P05556	N4(Deamidated); N9(Deamidated)	0	2.796e-06	82.05	1.99595e-08	2	1076.46	0.577632	8.90933	0
ScGEcIQAGPNcGWcTnSTFLQEGMPTSAR	1	P05556	C2(Carbamidomethyl); C5(Carbamidomethyl); C12(Carbamidomethyl); C15(Carbamidomethyl); N17(Deamidated)	0	2.428e-09	80.72	1.18612e-08	3	3377.38	0.828286	38.3902	0
DTcTQEcSYFnITK	1	P05556	C3(Carbamidomethyl); C7(Carbamidomethyl); N11(Deamidated)	0	3.418e-09	77.62	2.68122e-08	2	1767.72	2.03941	32.2105	0
cHEGnGTFEcGAcR	2	P05556	C1(Carbamidomethyl); N5(Deamidated); C10(Carbamidomethyl); C13(Carbamidomethyl)	0	1.243e-08	67.77	1.66713e-07	2	1655.6	2.38821	14.5075	0
SYcKnGVnGTGEnGRK	4	P05556	C3(Carbamidomethyl); N5(Deamidated); N8(Deamidated); N13(Deamidated)	0	1.202e-11	66.63	9.55989e-07	3	1743.76	0.0497941	9.51443	2
nGVnGTGEnGR	2	P05556	N1(Deamidated); N4(Deamidated); N9(Deamidated)	0	1.031e-05	63.72	6.36929e-07	2	1077.44	0.117228	10.7801	0
SYcKnGVnGTGEnGR	2	P05556	C3(Carbamidomethyl); N5(Deamidated); N8(Deamidated); N13(Deamidated)	0	3.216e-07	62.56	1.49749e-06	3	1615.67	0.317746	12.747	1
SYcKnGVnGTGENGR	2	P05556	C3(Carbamidomethyl); N5(Deamidated); N8(Deamidated)	0	2.877e-06	54.93	9.31962e-06	2	1614.68	-0.463069	11.6689	1
nGVnGTGEnGRK	1	P05556	N1(Deamidated); N4(Deamidated); N9(Deamidated)	0	3.13e-06	52.2	3.58523e-05	2	1205.54	0.307871	8.75014	1
NGVnGTGEnGRK	2	P05556	N4(Deamidated); N9(Deamidated)	0	9.925e-06	47.27	0.000137812	3	1204.56	0.0242591	7.7635	1
KNKnVTNR	1	P05556	N4(Deamidated)	0	0.0002348	45.64	0.000365683	2	974.538	0.27213	3.1122	2
NGVnGTGENGRK	2	P05556	N4(Deamidated)	0	9.677e-07	39.83	0.00108152	2	1203.57	-0.0853369	6.38898	1
SYcKnGVnGTGENGRK	1	P05556	C3(Carbamidomethyl); N5(Deamidated); N8(Deamidated)	0	0.0001349	11.42	0.504775	3	1742.78	0.999547	8.95064	2
NKnVTNR	1	P05556	N3(Deamidated)	0.001	0.03033	34.01	0.00778495	2	846.443	0.456697	3.49954	1
nKnVTNR	1	P05556	N1(Deamidated); N3(Deamidated)	0.001	0.05076	32.7	0.00802863	2	847.427	0.231586	4.12119	1
VETGVLKPGMVVTFAPVnVTTEVK	1	P68104	N18(Deamidated)	0	1.025e-10	56.48	1.73177e-05	3	2516.37	1.26958	40.4802	0
DGnASGTTLLEALDcILPPTRPTDKPLR	1	P68104	N3(Deamidated); C15(Carbamidomethyl)	0	1.07e-07	25.35	0.03851	4	3022.56	1.49532	48.6745	0
KDGnASGTTLLEALDcILPPTRPTDKPLR	1	P68104	N4(Deamidated); C16(Carbamidomethyl)	0	1.282e-05	16.89	0.217946	4	3150.65	-0.347501	42.1508	1
TLAGEnQTAFEIEELNR	2	P11047	N6(Deamidated)	0	5.25e-11	118.98	2.00461e-11	2	1935.93	1.49971	35.8116	0
IASAVQKnATSTK	2	P11047	N8(Deamidated)	0	8.582e-11	109.5	1.48106e-10	2	1319.72	0.664934	12.5086	1
TAnDTSTEAYNLLLR	1	P11047	N3(Deamidated)	0	1.157e-09	108.69	2.02811e-10	2	1682.83	1.99568	37.9364	0
KYEQAKnISQDLEK	3	P11047	N7(Deamidated)	0	1.872e-12	103.41	7.57021e-10	2	1694.87	3.7744	18.0912	2
KIPAInQTITEANEK	2	P11047	N6(Deamidated)	0	7.563e-10	96.33	3.30589e-09	2	1670.9	1.6961	24.7114	1
RVNDnKTAAEEALR	2	P11047	N5(Deamidated)	0	2.332e-12	95.05	5.31433e-09	2	1587.81	3.86542	15.356	2
YEQAKnISQDLEK	1	P11047	N6(Deamidated)	0	4.682e-11	94.41	5.59665e-09	2	1566.77	0.732317	20.1479	1
VNDnKTAAEEALR	2	P11047	N4(Deamidated)	0	7.454e-10	89.18	1.78756e-08	2	1431.71	0.823116	17.1309	1
TLAGEnQTAFEIEELNRK	2	P11047	N6(Deamidated)	0	8.279e-12	87.12	3.75561e-08	2	2064.03	2.82638	30.2459	1
KIPAInQTITEAnEK	1	P11047	N6(Deamidated); N13(Deamidated)	0	1.217e-09	67.3	2.84899e-06	2	1671.88	1.83681	25.4114	1
IASAVQKnATSTKAEAER	2	P11047	N8(Deamidated)	0	6.011e-12	67.27	2.98124e-06	3	1875.98	1.40363	14.2185	2
VAAAnVSVTQPESTGDPNnMTLLAEEARK	1	P11047	N5(Deamidated); N19(Deamidated)	0	2.269e-10	56.23	4.16906e-05	3	3015.46	2.07898	33.3848	1
LLNnLTSIK	1	P11047	N4(Deamidated)	0	0.0005458	52.3	5.00517e-05	2	1016.6	0.363292	29.9182	0
LLnnLTSIK	1	P11047	N3(Deamidated); N4(Deamidated)	0	0.0005528	48.01	0.000188959	2	1017.58	1.4355	32.8954	0
nISQDLEK	1	P11047	N1(Deamidated)	0	0.002606	24.73	0.0489624	2	947.467	-1.21565	21.601	0
LVSnHSLHETSSVFVDSLTK	2	P21333	N4(Deamidated)	0	1.974e-13	78.64	2.41404e-07	3	2201.11	2.36941	29.8453	0
nELMLnSSLMR	1	O00468	N1(Deamidated); N6(Deamidated)	0	1.709e-05	36.41	0.00239988	2	1309.61	0.0895436	42.5105	0
NELMLnSSLMR	1	O00468	N6(Deamidated)	0	4.268e-05	36.08	0.00350178	2	1308.63	1.12121	34.5605	0
cVEESGSAHcVcPMLTcPEAnATK	1	O00468	C1(Carbamidomethyl); C10(Carbamidomethyl); C12(Carbamidomethyl); C17(Carbamidomethyl); N21(Deamidated)	0	5.704e-08	34.44	0.000593586	3	2709.11	2.46577	25.5489	0
NELmLnSSLMR	1	O00468	M4(Oxidation); N6(Deamidated)	0	8.633e-06	34.29	0.00443146	2	1324.63	1.16816	31.4462	0
IFFVNPAPPYLWPAHKNELMLnSSLMR	2	O00468	N22(Deamidated)	0	7.062e-09	27.88	0.0253356	4	3186.63	1.29442	44.7877	1
SLDAYPILNQAQALEnHTEVQFQK	2	P26006	N16(Deamidated)	0	2.644e-13	103.56	7.97404e-10	2	2758.38	2.87162	40.2883	0
VWnSTFIEDYR	1	P26006	N3(Deamidated)	0	1.618e-06	77.92	1.21884e-07	2	1430.66	1.38036	36.0595	0
LRPIIISMnYSLPLR	3	P26006	N9(Deamidated)	0	5.689e-12	77.04	8.50097e-08	3	1787.03	0.448577	40.3477	0
KLLLSInVTNTR	2	P26006	N7(Deamidated)	0	1.996e-07	67.06	7.57636e-07	2	1372.82	0.850004	29.7216	1
AHcVWLEcPIPDAPVVTnVTVK	2	P26006	C3(Carbamidomethyl); C8(Carbamidomethyl); N18(Deamidated)	0	1.186e-10	60.72	1.453e-05	2	2506.26	3.45836	39.4931	0
LLLSInVTNTR	1	P26006	N6(Deamidated)	0	0.0003963	51.18	6.21094e-05	2	1244.72	1.32919	36.0534	0
VWnSTFIEDYRDFDR	2	P26006	N3(Deamidated)	0	9.505e-08	43.23	0.000375515	2	1963.89	1.9118	37.805	1
nITIVTGAPR	1	P26006	N1(Deamidated)	0	0.0007704	42.02	0.000832177	2	1042.59	0.792372	28.7259	0
DKLRPIIISMnYSLPLR	2	P26006	N11(Deamidated)	0	1.505e-10	41.56	0.000384028	3	2030.15	0.949927	38.7334	1
RnITLAYTLEADRDR	1	P26006	N2(Deamidated)	0	1.988e-10	40.69	0.00130951	3	1807.93	0.273057	25.329	2
DDcERMnITVK	1	P26006	C3(Carbamidomethyl); N7(Deamidated)	0	0.0001294	36.98	0.00109244	2	1381.61	-0.626528	21.3735	1
ARVWnSTFIEDYR	1	P26006	N5(Deamidated)	0	3.606e-05	34	0.00577255	3	1657.8	0.560029	31.0863	1
nITLAYTLEADRDR	2	P26006	N1(Deamidated)	0	2.638e-07	30.77	0.0144055	3	1651.83	0.659127	33.3704	1
VWnSTFIEDYRDFDRVR	2	P26006	N3(Deamidated)	0	1.12e-06	28.89	0.0209823	3	2219.05	0.977831	35.2496	2
nITLAYTLEADRDRRPPR	1	P26006	N1(Deamidated)	0	1.122e-05	28.72	0.0181273	3	2158.14	-0.0517316	25.4418	2
SLDAYPILNQAQALEnHTEVQFQKEcGPDNK	1	P26006	N16(Deamidated); C26(Carbamidomethyl)	0	6.12e-10	27.7	0.0235207	4	3558.68	1.06153	37.3742	1
ARVWnSTFIEDYRDFDR	1	P26006	N5(Deamidated)	0	2.501e-06	27.58	0.0231321	3	2191.03	2.76814	33.6783	2
TGAVYLcPLTAHKDDcERMnITVK	1	P26006	C7(Carbamidomethyl); C16(Carbamidomethyl); N20(Deamidated)	0	1.06e-10	24.06	0.0665533	4	2793.34	0.997761	27.387	2
SLDAYPILNQAQALEnHTEVQFQKEcGPDNKcESNLQMR	1	P26006	N16(Deamidated); C26(Carbamidomethyl); C32(Carbamidomethyl)	0	5.768e-10	21.58	0.0834029	4	4577.13	3.36137	35.8541	2
LRPIIISmnYSLPLR	1	P26006	M8(Oxidation); N9(Deamidated)	0	4.398e-05	14.66	0.16073	3	1803.02	-0.323407	36.247	0
mnITVK	1	P26006	M1(Oxidation); N2(Deamidated)	0.002	0.06163	40.3	0.000643945	2	722.374	-2.09781	14.6465	0
MnITVK	1	P26006	N2(Deamidated)	0.007	0.2507	34.57	0.00443408	2	706.38	-0.876241	20.1024	0
MAVTFIGnSTAIQELFKR	1	P07437	N8(Deamidated)	0	2.306e-09	57.76	2.69666e-05	3	2027.07	1.12256	46.3548	1
TnSTFVQALVEHVKEEcDR	3	P07602	N2(Deamidated); C17(Carbamidomethyl)	0	1.629e-13	92.68	7.93081e-09	2	2263.07	2.4522	35.5784	1
DVVTAAGDMLKDnATEEEILVYLEK	2	P07602	N13(Deamidated)	0	2.535e-16	92.33	9.99991e-09	3	2767.36	0.266082	51.3328	1
NLEKnSTKQEILAALEK	3	P07602	N5(Deamidated)	0	6.835e-12	91.99	6.00791e-09	2	1930.05	1.96306	26.8069	2
nSTKQEILAALEK	2	P07602	N1(Deamidated)	0	3.203e-10	91.72	1.08686e-08	2	1445.79	0.962135	29.9155	1
TcDWLPKPnMSAScK	2	P07602	C2(Carbamidomethyl); N9(Deamidated); C14(Carbamidomethyl)	0	1.027e-11	83.18	2.6927e-08	2	1795.79	2.11967	27.3524	0
LIDNnKTEKEILDAFDK	5	P07602	N5(Deamidated)	0	3.359e-12	78.63	2.38533e-07	2	2007.03	1.91961	32.4169	2
TnSTFVQALVEHVK	2	P07602	N2(Deamidated)	0	8.072e-09	59.87	1.67953e-05	2	1573.83	2.3026	35.0661	0
LIDNnKTEK	2	P07602	N5(Deamidated)	0	0.0001412	58.02	3.5654e-05	2	1075.56	0.575449	9.081	1
NLEKnSTK	1	P07602	N5(Deamidated)	0	0.002016	56.56	3.74257e-05	2	934.483	-1.41649	5.96785	1
SLPcDIcKDVVTAAGDMLKDnATEEEILVYLEK	2	P07602	C4(Carbamidomethyl); C7(Carbamidomethyl); N21(Deamidated)	0	2.486e-14	52.77	7.53034e-05	4	3740.81	2.89883	51.992	2
TcDWLPKPnmSAScK	2	P07602	C2(Carbamidomethyl); N9(Deamidated); M10(Oxidation); C14(Carbamidomethyl)	0	2.186e-06	48.24	5.84877e-05	2	1811.78	2.14518	24.4784	0
TnSTFVQALVEHVKEEcDRLGPGMADIcK	2	P07602	N2(Deamidated); C17(Carbamidomethyl); C28(Carbamidomethyl)	0	6.262e-13	44.25	0.000511139	3	3305.57	1.90711	41.4489	2
SLPcDIcKDVVTAAGDmLKDnATEEEILVYLEK	1	P07602	C4(Carbamidomethyl); C7(Carbamidomethyl); M17(Oxidation); N21(Deamidated)	0	5.091e-11	32.64	0.00767749	4	3756.79	-0.503969	47.1766	2
DVVTAAGDMLKDnATEEEILVYLEKTcDWLPKPnMSAScK	1	P07602	N13(Deamidated); C27(Carbamidomethyl); N34(Deamidated); C39(Carbamidomethyl)	0	3.886e-08	26.44	0.0226986	4	4544.12	-0.272108	52.496	2
LIDnnKTEK	1	P07602	N4(Deamidated); N5(Deamidated)	0	0.003224	26.15	0.0423443	2	1076.55	1.36196	10.4359	1
VYcnLSAAHTFEDLK	2	Q92626	C3(Carbamidomethyl); N4(Deamidated)	0	1.391e-09	87.69	2.16174e-08	2	1768.82	2.1231	29.4853	0
VNncSDMcFHQK	2	Q92626	N3(Deamidated); C4(Carbamidomethyl); C8(Carbamidomethyl)	0	2.227e-09	76.78	2.09397e-08	2	1540.6	1.04345	16.0446	0
ILcDNADnITR	1	Q92626	C3(Carbamidomethyl); N8(Deamidated)	0	4.231e-05	62.9	4.74397e-06	2	1305.61	1.02682	23.2247	0
QGEHLSnSTSAFSTR	1	Q92626	N7(Deamidated)	0	2.088e-07	55.25	2.64206e-05	3	1622.74	0.875193	19.257	0
RVNncSDMcFHQK	2	Q92626	N4(Deamidated); C5(Carbamidomethyl); C9(Carbamidomethyl)	0	3.879e-07	47.56	3.77084e-05	3	1696.7	0.912539	14.3244	1
VYcnLSAAHTFEDLKNEIKNPEIR	4	Q92626	C3(Carbamidomethyl); N4(Deamidated)	0	1.106e-08	38.3	0.00263281	4	2862.41	0.2199	32.5752	2
LSDTTSQSnSTAKELDSLQTEAESLDNTVK	1	P07942	N9(Deamidated)	0	1.686e-15	99.98	1.46674e-09	3	3213.53	5.25685	36.9136	1
QSAEDILLKTnATK	2	P07942	N11(Deamidated)	0	1.436e-11	90.29	1.52939e-08	2	1532.82	-0.0791882	25.477	1
VnASTTEPnSTVEQSALMR	1	P07942	N2(Deamidated); N9(Deamidated)	0	3.075e-11	86.22	2.44751e-08	2	2036.95	2.49542	28.8874	0
LSDTTSQSnSTAK	1	P07942	N9(Deamidated)	0	2.466e-09	84.97	3.00907e-08	2	1340.62	1.7032	9.44881	0
MEMPSTPQQLQnLTEDIR	1	P07942	N12(Deamidated)	0	9.129e-10	82.98	6.67138e-08	2	2132	0.853322	41.4209	0
MEMPSTPQQLQnLTEDIRER	1	P07942	N12(Deamidated)	0	2.081e-08	42.28	0.00086368	3	2417.15	1.94125	37.4069	1
TnATKEK	1	P07942	N2(Deamidated)	0	0.004639	29.21	0.0184723	2	792.41	0.346384	0.675651	1
GTnYTVR	1	P07942	N3(Deamidated)	0.001	0.04024	43.11	0.000273645	2	811.392	-2.65809	13.8921	0
YYKGSLSYLnVTR	2	P07339	N10(Deamidated)	0	1.63e-09	66.68	3.47949e-06	2	1564.8	-1.34061	26.5197	1
GSLSYLnVTR	1	P07339	N7(Deamidated)	0	0.0001027	59.85	1.19041e-05	2	1110.58	2.22514	28.2205	0
GSLSYLnVTRK	2	P07339	N7(Deamidated)	0	6.747e-06	57.42	2.00153e-05	2	1238.67	0.0246183	23.1747	1
HYHSMEVFTHYDLLNLnGTK	4	Q9Y4K0	N17(Deamidated)	0	1.574e-15	75.37	4.37055e-07	3	2420.14	2.2148	32.7177	0
LGPQVSLDPMKnVTcEnGLPAVVScVPGQVFSPDGPSR	1	Q9Y4K0	N12(Deamidated); C15(Carbamidomethyl); N17(Deamidated); C25(Carbamidomethyl)	0	1.265e-15	68.19	2.27558e-06	3	4010.93	0.771695	47.6657	1
HYHSmEVFTHYDLLNLnGTK	2	Q9Y4K0	M5(Oxidation); N17(Deamidated)	0	1.862e-11	62.42	7.30315e-06	4	2436.14	2.85397	29.5227	0
NGGIcTDLVAnYScEcPGEFMGR	1	O43854	C5(Carbamidomethyl); N11(Deamidated); C14(Carbamidomethyl); C16(Carbamidomethyl)	0	1.571e-12	89.91	1.6335e-09	2	2608.07	3.34971	39.7924	0
nGGIcTDLVAnYScEcPGEFMGR	1	O43854	N1(Deamidated); C5(Carbamidomethyl); N11(Deamidated); C14(Carbamidomethyl); C16(Carbamidomethyl)	0	5.674e-09	56.98	2.70604e-06	2	2609.05	3.20532	46.4862	0
DKVFQGNFDnDTHRK	1	O43854	N10(Deamidated)	0	1.205e-10	34.46	0.0044404	3	1821.86	2.14867	16.6385	2
VAYSNDSAnWTEYQDPR	1	Q08431	N9(Deamidated)	0	1.372e-11	111.69	2.84609e-11	2	2016.86	2.63032	28.5524	0
FELLGcELnGcANPLGLKnNSIPDK	2	Q08431	C6(Carbamidomethyl); N9(Deamidated); C11(Carbamidomethyl); N19(Deamidated)	0	2.623e-14	82.06	9.9568e-08	3	2775.34	1.22744	42.9044	1
nNSIPDKQITASSSYK	4	Q08431	N1(Deamidated)	0	1.743e-07	59.05	1.78588e-05	3	1753.86	0.514811	20.8548	1
nNSIPDK	1	Q08431	N1(Deamidated)	0.005	0.1443	36.35	0.000961719	2	788.378	-0.362609	12.5585	0
GYYnQSEAGSHTVQR	2	P01892	N4(Deamidated)	0	2.574e-10	100.05	5.98075e-10	2	1697.76	2.56079	15.5552	0
TIGTKPVAHIDQFTADMLGSAELAEEVNLnGSGK	2	P50991	N30(Deamidated)	0	3.033e-12	47.76	0.000264641	3	3514.75	2.73476	42.5146	0
VYcnFTAGGSTcVFPDKK	2	P20908	C3(Carbamidomethyl); N4(Deamidated); C12(Carbamidomethyl)	0	1.427e-13	105.51	2.05269e-10	2	2051.92	2.14572	27.3886	1
KnVTLILDcK	1	P20908	N2(Deamidated); C9(Carbamidomethyl)	0	5.611e-08	89.52	1.68088e-08	2	1204.66	0.346189	24.857	1
nVTLILDcK	1	P20908	N1(Deamidated); C8(Carbamidomethyl)	0	0.0009127	52.48	0.0001144	2	1076.57	1.86078	35.1552	0
nVTLILDcKK	1	P20908	N1(Deamidated); C8(Carbamidomethyl)	0	0.001748	40.04	0.0014912	2	1204.66	1.05551	26.8429	1
IISAnGcKVDNSSLTGESEPQTR	1	P05023	N5(Deamidated); C7(Carbamidomethyl)	0	5.11e-12	73.51	6.39517e-07	3	2464.16	0.302192	23.6146	1
EVPLSALTNILSAQLISHWKGnMTR	1	P05121	N22(Deamidated)	0	1.983e-12	57.89	1.39797e-05	3	2780.49	5.0003	48.7495	1
EVPLSALTNILSAQLISHWKGnmTR	2	P05121	N22(Deamidated); M23(Oxidation)	0	2.848e-11	50.67	8.61323e-05	3	2796.48	2.44676	47.6457	1
FnYTEFTTPDGHYYDILELPYHGDTLSMFIAAPYEK	2	P05121	N2(Deamidated)	0	8.027e-11	21.28	0.0655364	4	4259.96	2.69054	53.226	0
GnMTRLPR	1	P05121	N2(Deamidated)	0.002	0.05762	25.9	0.0480664	2	945.492	-1.67889	15.8027	1
nTTWQAGHNFYNVDMSYLK	2	P07858	N1(Deamidated)	0	9.072e-12	93.85	3.52343e-09	3	2290.03	3.25306	36.8969	0
nTTWQAGHNFYNVDMSYLKR	3	P07858	N1(Deamidated)	0	1.083e-10	78.86	1.5342e-07	3	2446.13	1.75421	32.3291	1
GTWSTAESGAEcTNWnSSALAQKPYSGR	2	P00750	C12(Carbamidomethyl); N16(Deamidated)	0	1.099e-14	109.26	7.58892e-11	3	3017.34	2.48199	29.2206	0
YSSEFcSTPAcSEGNSDcYFGnGSAYR	1	P00750	C6(Carbamidomethyl); C11(Carbamidomethyl); C18(Carbamidomethyl); N22(Deamidated)	0	3.952e-08	72.03	6.2513e-08	2	3074.16	2.98441	31.5963	0
KGnYSER	1	P04908;P20671	N3(Deamidated)	0	0.004026	34.56	0.0019422	2	854.4	-0.549424	5.41743	1
nDTSGEYKK	1	P08133	N1(Deamidated)	0	0.0006287	35.22	0.0010371	2	1042.47	-1.03441	7.44119	1
KGnYSER	1	P04908;P20671	N3(Deamidated)	0	0.004026	34.56	0.0019422	2	854.4	-0.549424	5.41743	1
KALAAAGYDVEKnNSR	2	P10412;P16403	N13(Deamidated)	0	6.305e-16	114.61	6.2788e-11	2	1707.87	1.01188	16.1602	2
ALAAAGYDVEKnNSR	2	P10412;P16403	N12(Deamidated)	0	1.187e-10	87.04	2.9358e-08	2	1579.77	1.63437	19.0948	1
LTScATnASIcGDEAR	1	Q07954	C4(Carbamidomethyl); N7(Deamidated); C11(Carbamidomethyl)	0	3.461e-12	103.7	1.51436e-10	2	1726.74	0.396857	20.8433	0
FGTcSQLcnNTK	1	Q07954	C4(Carbamidomethyl); C8(Carbamidomethyl); N9(Deamidated)	0	1.317e-06	86.29	6.81394e-09	2	1430.61	1.8801	19.3444	0
GSKDnATDSVPLR	2	Q07954	N5(Deamidated)	0	6.084e-08	83.97	6.43391e-08	2	1360.67	1.86074	17.7657	1
WTGHnVTVVQR	1	Q07954	N5(Deamidated)	0	4.777e-09	69.88	1.26446e-06	2	1297.67	0.21528	19.6505	0
DGTcIGnSSR	1	Q07954	C4(Carbamidomethyl); N7(Deamidated)	0	1.074e-05	59.21	3.3586e-06	2	1067.44	0.272784	13.076	0
MHLnGSNVQVLHR	3	Q07954	N4(Deamidated)	0	1.541e-08	56.31	4.35024e-05	3	1505.76	-0.420612	21.088	0
RMHLnGSNVQVLHR	3	Q07954	N5(Deamidated)	0	2.759e-05	48.21	0.000265019	4	1661.87	1.4196	19.171	1
nSTTLVMHMK	2	Q07954	N1(Deamidated)	0	9.968e-06	46.99	0.000260982	2	1162.56	0.375742	22.5002	0
LYWVDAFYDRIETILLnGTDRK	1	Q07954	N17(Deamidated)	0	3.472e-14	43.48	0.000717993	3	2702.38	0.472144	52.7715	2
LHKDnTTcYEFKK	2	Q07954	N5(Deamidated); C8(Carbamidomethyl)	0	3.627e-10	42.26	0.000683436	3	1684.8	-0.591734	13.9879	2
AVnSScR	1	Q07954	N3(Deamidated); C6(Carbamidomethyl)	0	0.001733	37.83	0.00060982	2	794.345	-1.89994	5.09493	0
RGSKDnATDSVPLR	1	Q07954	N6(Deamidated)	0	0.0001043	33.24	0.00820439	2	1516.78	4.37537	14.9542	2
THAnGSIKR	1	Q07954	N4(Deamidated)	0	0.003567	29.08	0.0116797	2	984.522	0.0467846	6.3153	1
cnASSQFLcSSGR	1	Q07954	C1(Carbamidomethyl); N2(Deamidated); C9(Carbamidomethyl)	0	7.136e-06	21.91	0.0148159	2	1474.6	-0.0605605	23.162	0
MLnTSSLLEQLNEQFNWVSR	3	P10909	N3(Deamidated)	0	5.24e-10	93.06	8.84816e-09	3	2410.17	0.267452	54.9041	0
LAnLTQGEDQYYLR	2	P10909	N3(Deamidated)	0	1.226e-09	83.56	5.72721e-08	2	1684.82	1.48427	32.1385	0
KEDALnETRESETK	2	P10909	N6(Deamidated)	0	2.356e-12	74.59	5.47369e-07	2	1650.78	1.48413	12.4793	2
mLnTSSLLEQLNEQFNWVSR	1	P10909	M1(Oxidation); N3(Deamidated)	0	3.077e-11	65.19	4.69172e-06	2	2426.17	1.43632	54.1481	0
LKELPGVcnETMMALWEEcKPcLK	2	P10909	C8(Carbamidomethyl); N9(Deamidated); C19(Carbamidomethyl); C22(Carbamidomethyl)	0	2.535e-16	57.02	2.999e-05	3	2937.38	2.38286	37.6601	1
KEDALnETR	1	P10909	N6(Deamidated)	0	8.291e-06	52.91	6.37044e-05	2	1076.52	0.681181	10.8681	1
KKEDALnETR	2	P10909	N7(Deamidated)	0	5.146e-05	49.35	0.000223579	3	1204.62	0.5475	8.97981	2
ELPGVcnETMMALWEEcKPcLK	2	P10909	C6(Carbamidomethyl); N7(Deamidated); C17(Carbamidomethyl); C20(Carbamidomethyl)	0	3.407e-09	40.43	0.000588726	2	2696.2	2.76832	41.9659	0
EIRHnSTGcLR	1	P10909	N5(Deamidated); C9(Carbamidomethyl)	0	0.000608	39.02	0.0010777	3	1343.65	-0.279345	11.2591	1
HnSTGcLR	1	P10909	N2(Deamidated); C6(Carbamidomethyl)	0	0.006698	33.19	0.00220677	2	945.422	1.27065	8.73912	0
LKELPGVcnETmMALWEEcKPcLK	3	P10909	C8(Carbamidomethyl); N9(Deamidated); M12(Oxidation); C19(Carbamidomethyl); C22(Carbamidomethyl)	0	1.337e-08	30.86	0.0106236	3	2953.37	0.723112	35.4081	1
EDALnETRESETK	1	P10909	N5(Deamidated)	0	5.281e-05	17.92	0.134799	3	1522.69	0.557516	15.3144	1
KYQTLncSVNVNcVNIR	2	P23229	N6(Deamidated); C7(Carbamidomethyl); C13(Carbamidomethyl)	0	1.912e-13	95.49	4.7458e-09	2	2083.01	2.54092	26.0914	1
YQTLncSVNVNcVNIR	1	P23229	N5(Deamidated); C6(Carbamidomethyl); C12(Carbamidomethyl)	0	5.186e-10	91.72	9.11883e-09	2	1954.91	1.14599	30.3789	0
VTcEPQKEINSLnLTESHNSR	2	P23229	C3(Carbamidomethyl); N13(Deamidated)	0	2.855e-16	88.15	2.13587e-08	3	2457.17	1.9307	22.8806	1
QLScVANQnGSQADcELGNPFKR	1	P23229	C4(Carbamidomethyl); N9(Deamidated); C15(Carbamidomethyl)	0	1.81e-13	76.92	2.06284e-07	3	2594.18	1.48653	27.2652	1
AnHSGAVVLLK	2	P23229	N2(Deamidated)	0	1.219e-07	65.16	1.98113e-06	2	1109.63	-0.65289	21.1445	0
SRLWnSTFLEEYSK	2	P23229	N5(Deamidated)	0	6.553e-08	62.32	8.4697e-06	3	1760.85	1.48246	34.6816	1
LSAVNSIFLSHnNTK	3	P48960	N12(Deamidated)	0	3.768e-11	102.65	8.55619e-10	2	1645.86	2.71409	27.601	0
TFKnESENTcQDVDEcQQNPR	3	P48960	N4(Deamidated); C10(Carbamidomethyl); C16(Carbamidomethyl)	0	3.593e-10	73.81	7.27844e-08	2	2600.07	2.74699	17.4617	1
GDKnVTMGQSSAR	2	P48960	N4(Deamidated)	0	1.025e-06	73.27	4.2388e-07	3	1351.63	-0.532586	10.7781	1
WcPQNSScVnATAcR	1	P48960	C2(Carbamidomethyl); C8(Carbamidomethyl); N10(Deamidated); C14(Carbamidomethyl)	0	1.374e-09	71.96	8.27834e-08	2	1811.73	0.880536	21.3957	0
WcPQnSScVnATAcR	1	P48960	C2(Carbamidomethyl); N5(Deamidated); C8(Carbamidomethyl); N10(Deamidated); C14(Carbamidomethyl)	0	1.457e-08	55.65	2.71625e-06	2	1812.71	0.404691	23.0738	0
RLSAVNSIFLSHnNTK	2	P48960	N13(Deamidated)	0	7.481e-09	39.29	0.00196071	3	1801.96	0.989634	24.2308	1
KALAAAGYDVEKnNSR	2	P10412;P16403	N13(Deamidated)	0	6.305e-16	114.61	6.2788e-11	2	1707.87	1.01188	16.1602	2
ALAAAGYDVEKnNSR	2	P10412;P16403	N12(Deamidated)	0	1.187e-10	87.04	2.9358e-08	2	1579.77	1.63437	19.0948	1
AINQGNYGWQAGnHSAFWGMTLDEGIR	2	Q9GZM7	N13(Deamidated)	0	1.956e-13	83.9	3.82937e-08	2	2994.36	1.0723	40.3926	0
GNVISSHGNPILLnSSIPEDPSIK	2	P21589	N14(Deamidated)	0	5.669e-14	93.72	6.47545e-09	2	2489.29	2.08386	34.2251	0
IKLDnYSTQELGK	2	P21589	N5(Deamidated)	0	2.094e-10	92.36	8.42108e-09	2	1509.78	0.9035	24.9808	1
cVnASR	1	P21589	C1(Carbamidomethyl); N3(Deamidated)	0.002	0.07781	31.12	0.00652915	2	707.314	0.00454227	5.91178	0
TASIKPEVALLDTQDMEnMSDDDGWEFVNLGDQQSFGIK	2	O00410	N18(Deamidated)	0	0.01049	26.03	0.0241976	3	4345.01	7.80064	49.9176	0
VTTYcnETMTGWVHDVLGR	2	P53634	C5(Carbamidomethyl); N6(Deamidated)	0	7.956e-13	110.32	9.24322e-11	2	2240.01	1.69145	40.7667	0
DVncSVMGPQEK	1	P53634	N3(Deamidated); C4(Carbamidomethyl)	0	6.736e-07	56.95	6.86245e-06	2	1364.58	0.0363621	21.7563	0
DVncSVMGPQEKK	2	P53634	N3(Deamidated); C4(Carbamidomethyl)	0	8.887e-06	36.29	0.00173873	2	1492.68	-1.1112	17.5455	1
EQInITLDHR	2	Q02809	N4(Deamidated)	0	2.421e-06	76.59	3.09185e-07	2	1239.63	-0.178554	23.6803	0
YIHQnYTK	2	Q02809	N5(Deamidated)	0	0.008814	39.86	0.000944977	3	1067.52	-0.494105	12.1693	0
YncSIR	1	Q02809	N2(Deamidated); C3(Carbamidomethyl)	0.007	0.2191	27.3	0.00661041	2	813.356	0.553971	14.5006	0
AQAALDKAnASR	2	P55268	N9(Deamidated)	0	1.252e-05	80.18	1.88043e-07	3	1216.63	0.0325862	12.0788	1
AnTSALAVPSPVSNSASAR	1	P55268	N2(Deamidated)	0	1.192e-07	56.16	3.49839e-05	2	1800.91	1.90996	28.6959	0
LALnLTLR	1	P55268	N4(Deamidated)	0	0.002165	43.53	0.000257293	2	914.568	0.617977	35.5112	0
RAnTSALAVPSPVSNSASAR	2	P55268	N3(Deamidated)	0	4.594e-09	43.19	0.000825142	3	1957.01	2.03923	24.7032	1
DIENLKDASSFLAEWQnITK	2	P08195	N17(Deamidated)	0	2.546e-13	91.42	1.29078e-08	3	2323.15	0.692368	48.2659	1
SLVTQYLnATGNR	1	P08195	N8(Deamidated)	0	6.913e-08	86.23	3.51392e-08	2	1437.73	1.13622	32.2232	0
ATDVLnKTILFSYGTK	2	P26022	N6(Deamidated)	0	1.441e-10	71.12	1.1397e-06	3	1771.95	0.803371	35.4371	1
ATDVLnKTILFSYGTKR	1	P26022	N6(Deamidated)	0	6.34e-07	15.66	0.29745	3	1928.05	1.94918	30.7398	2
cLSKEnATTDLLTKLPAHTVGDVK	2	P28799	C1(Carbamidomethyl); N6(Deamidated)	0	1.385e-14	71.8	8.98543e-07	3	2612.36	1.71716	28.9285	2
cLSKEnATTDLLTK	2	P28799	C1(Carbamidomethyl); N6(Deamidated)	0	1.575e-10	69.76	1.68034e-06	2	1594.8	1.55136	23.181	1
DVEcGEGHFcHDnQTccRDNR	1	P28799	C4(Carbamidomethyl); C10(Carbamidomethyl); N13(Deamidated); C16(Carbamidomethyl); C17(Carbamidomethyl)	0	4.929e-08	25.55	0.00277952	3	2666.99	1.47733	14.1134	1
EnATTDLLTK	1	P28799	N2(Deamidated)	0	9.843e-05	24.59	0.05995	2	1106.56	1.04479	25.5912	0
DVEcGEGHFcHDnQTccR	1	P28799	C4(Carbamidomethyl); C10(Carbamidomethyl); N13(Deamidated); C16(Carbamidomethyl); C17(Carbamidomethyl)	0	3.062e-07	22.68	0.00538233	3	2281.82	4.71353	15.3651	0
YGccPMPnATccSDHLHccPQDTVcDLIQSK	2	P28799	C3(Carbamidomethyl); C4(Carbamidomethyl); N8(Deamidated); C11(Carbamidomethyl); C12(Carbamidomethyl); C18(Carbamidomethyl); C19(Carbamidomethyl); C25(Carbamidomethyl)	0	5.57e-09	19.78	0.0104947	3	3785.48	2.2856	30.8114	0
LNLQTSTSIPnVTEMK	1	P17301	N11(Deamidated)	0	4.513e-10	91.52	1.27902e-08	2	1776.91	1.28582	34.8471	0
TnMSLGLILTR	1	P17301	N2(Deamidated)	0	1.95e-07	85.34	3.47974e-08	2	1219.67	1.30855	40.8156	0
QAFDQILQDRnHSSYLGYSVAAISTGESTHFVAGAPR	1	P17301	N11(Deamidated)	0	2.187e-14	60.66	1.3057e-05	4	3994.96	5.81824	37.6459	1
YFFnVSDEAALLEK	1	P17301	N4(Deamidated)	0	2.912e-08	33.88	0.0062003	2	1646.8	1.52634	45.1873	0
HNIIPIFAVTnYSYSYYEK	1	P16144	N11(Deamidated)	0	4.028e-11	54.87	5.75102e-05	2	2323.13	2.75997	41.8498	0
ENYAELLEDAFLKnVTAQIcIDKK	1	P12109	N14(Deamidated); C20(Carbamidomethyl)	0	7.21e-11	88.03	2.89613e-08	3	2826.42	0.330482	49.6722	2
RnFTAADWGQSR	1	P12109	N2(Deamidated)	0	1.779e-08	48.81	0.000147305	2	1409.67	7.51246	21.9255	1
ITDSEDKALMnGSESR	2	P35613	N11(Deamidated)	0	1.491e-12	121.11	7.43483e-12	2	1753.79	2.2067	19.4532	1
ILLTcSLnDSATEVTGHR	2	P35613	C5(Carbamidomethyl); N8(Deamidated)	0	1.06e-10	91.09	1.33044e-08	2	1987.98	3.36621	30.3094	0
ALMnGSESR	1	P35613	N4(Deamidated)	0	0.001671	55.24	2.93242e-05	2	965.436	0.557842	15.4872	0
RnQSLSLLYK	1	Q06481	N2(Deamidated)	0	2.12e-06	45.54	0.000263895	2	1222.68	1.56092	23.8945	1
KQEEFDVANnGSSQANK	2	P29144	N10(Deamidated)	0	2.732e-16	136.24	2.02031e-13	2	1866.85	2.73337	16.5175	1
GTQLMnGTSMSSPNAcGGIALILSGLK	2	P29144	N6(Deamidated); C16(Carbamidomethyl)	0	1.406e-05	39.05	0.00194767	2	2679.31	-0.800735	50.2553	0
LnYSLPTGQWVGVQLPR	1	P24821	N2(Deamidated)	0	1.396e-08	82.69	7.21282e-08	2	1929.03	1.86081	44.5969	0
LLETVEYnISGAER	1	P24821	N8(Deamidated)	0	4.989e-05	31.36	0.0112595	2	1594.8	1.90651	34.543	0
nLTVPGSLR	1	P24821	N1(Deamidated)	0.001	0.02729	29.2	0.0111811	2	957.537	0.390025	29.166	0
ccGAAnYTDWEKIPSMSK	2	P08962	C1(Carbamidomethyl); C2(Carbamidomethyl); N6(Deamidated)	0	2.161e-11	90.5	3.2085e-09	2	2118.91	5.69237	31.0429	1
QQMENYPKNnHTASILDR	4	P08962	N10(Deamidated)	0	2.894e-10	79.71	1.58755e-07	2	2160.02	1.03869	20.1995	1
NRVPDSccInVTVGcGINFNEK	2	P08962	C7(Carbamidomethyl); C8(Carbamidomethyl); N10(Deamidated); C15(Carbamidomethyl)	0	7.269e-14	76.52	1.89417e-07	3	2554.15	1.78883	31.517	1
QQmENYPKNnHTASILDR	4	P08962	M3(Oxidation); N10(Deamidated)	0	1.347e-08	70.93	9.84827e-07	2	2176.02	3.1435	18.7512	1
QQMENYPKnnHTASILDR	1	P08962	N9(Deamidated); N10(Deamidated)	0	4.23e-09	69.27	1.59119e-06	4	2161	0.457554	22.3437	1
ccGAAnYTDWEKIPSmSK	1	P08962	C1(Carbamidomethyl); C2(Carbamidomethyl); N6(Deamidated); M16(Oxidation)	0	2.498e-08	19.47	0.0372833	3	2134.89	1.39257	27.5603	1
nnHTASILDR	2	P08962	N1(Deamidated); N2(Deamidated)	0	0.0004073	19.03	0.111898	2	1142.54	0.591506	20.4495	0
RQQLPGnATDWIWAGLDPDTDYDVALVPESNVR	1	Q6PCB0	N7(Deamidated)	0	2.535e-16	83.93	6.63504e-08	3	3712.8	2.81936	51.0733	1
ncTTLQGLAPGTAYLVTVTAAFR	1	Q6PCB0	N1(Deamidated); C2(Carbamidomethyl)	0	2.984e-13	83.1	7.66504e-08	2	2426.24	2.4363	54.1879	0
AFnSTLPTMAQMEK	1	P16070	N3(Deamidated)	0	1.271e-08	66.72	2.4048e-06	2	1569.73	2.47578	32.8852	0
AFnSTLPTmAQMEK	1	P16070	N3(Deamidated); M9(Oxidation)	0	0.0001426	31.21	0.0059033	2	1585.73	2.34737	27.6057	0
GVVDSDDLPLnVSR	1	P14625	N11(Deamidated)	0	3.712e-07	66.38	4.02752e-06	2	1486.74	0.734663	35.1386	0
HNnDTQHIWESDSNEFSVIADPR	1	P14625	N3(Deamidated)	0	5.975e-13	61.67	4.62923e-06	3	2712.2	3.46395	33.5901	0
GAnDSTSAMPEQMK	1	O95084	N3(Deamidated)	0	1.062e-09	98.56	2.50768e-10	2	1467.61	0.963424	20.1905	0
GAnDSTSAMPEQmK	1	O95084	N3(Deamidated); M13(Oxidation)	0	3.956e-06	48.47	2.27573e-05	2	1483.61	1.41844	15.3261	0
DGGRGAnDSTSAMPEQMK	1	O95084	N7(Deamidated)	0	5.457e-10	45.74	8.53395e-05	2	1852.79	3.07478	18.7616	1
TASVSInQTEPPKVR	2	P29317	N7(Deamidated)	0	2.575e-09	89.81	1.49917e-08	2	1627.87	0.744064	21.1415	1
TASVSInQTEPPK	1	P29317	N7(Deamidated)	0	3.032e-07	59.83	1.42469e-05	2	1372.7	0.426329	20.9929	0
VVAnGTGTQGQLK	1	P08236	N4(Deamidated)	0	3.309e-08	96.73	3.25918e-09	2	1273.68	1.35191	16.4492	0
IAnETRYPHSVAK	1	P08236	N3(Deamidated)	0	5.729e-09	60.51	1.41828e-05	2	1486.77	1.57537	14.5557	1
ITIAInNTLTPTTLPPGTIQYLTDTSKYPK	1	P08236	N6(Deamidated)	0	3.725e-09	35.07	0.00166477	3	3276.76	0.295105	44.9155	1
GLPSLTSVSWnISVPR	1	Q9H5V8	N11(Deamidated)	0	5.55e-13	123.11	6.69454e-12	2	1713.92	1.11184	44.2484	0
IGTFcSnGTVSR	1	Q9H5V8	C5(Carbamidomethyl); N7(Deamidated)	0	7.506e-08	84.55	2.56049e-08	2	1299.6	0.711223	21.6232	0
TcSSnLTLTSGSK	1	Q9H5V8	C2(Carbamidomethyl); N5(Deamidated)	0	8.111e-09	80.57	6.66521e-08	2	1356.63	0.607612	19.8183	0
ESnITVLIK	1	Q9H5V8	N3(Deamidated)	0	3.376e-05	65.14	2.86294e-06	2	1017.58	0.531865	31.3832	0
nVSGFSIANR	1	Q9H5V8	N1(Deamidated)	0	0.0001489	52.81	6.96389e-05	2	1065.53	0.800936	27.7972	0
LQFQVLVQHPQnESNK	2	Q9H5V8	N12(Deamidated)	0	1.969e-10	52.49	9.41275e-05	2	1909.98	3.13946	27.6269	0
LQQHTHEKPcnTSFSYLVASAIPSQDLYFGSFcPGGSIK	1	Q9H5V8	C10(Carbamidomethyl); N11(Deamidated); C33(Carbamidomethyl)	0	2.138e-11	47.28	0.000203904	4	4373.07	1.5157	41.1804	0
LQFQVLVQHPQnESNKIYVVDLSNER	1	Q9H5V8	N12(Deamidated)	0	6.788e-09	24.46	0.0476268	4	3098.6	1.75652	35.7755	1
QnISVTLR	1	Q9H5V8	N2(Deamidated)	0.002	0.06383	46.37	0.000416368	2	931.524	3.51801	24.2082	0
VnVTVEDER	1	P13726	N2(Deamidated)	0	0.0001275	61.28	8.78784e-06	2	1061.51	0.149501	19.2436	0
nNTFLSLR	2	P13726	N1(Deamidated)	0	0.005215	46.77	0.000307152	2	965.507	1.83969	32.8754	0
RnNTFLSLR	3	P13726	N2(Deamidated)	0	0.0003468	45.29	0.000332776	2	1121.61	1.434	24.1258	1
nGSGAVFPVAGADVQTLR	1	O00391	N1(Deamidated)	0	1.056e-08	43.69	0.000709754	2	1759.9	1.35836	38.9319	0
nGSVSRVPVLMESR	1	O00391	N1(Deamidated)	0	0.0001728	23.02	0.0870553	3	1531.79	1.1031	27.0794	1
HLLEnSTASVSEAERK	2	P42892	N5(Deamidated)	0	7.183e-13	81.82	1.12459e-07	3	1771.88	1.00909	19.333	1
LLGGGDEEAIRPQMQQILDFETALAnITIPQEK	1	P42892	N26(Deamidated)	0	6.216e-12	75.53	3.41476e-07	3	3639.88	5.33013	54.0464	0
LGGWnITGPWAK	1	P42892	N5(Deamidated)	0	1.227e-08	66.31	3.20421e-06	2	1300.67	1.67959	39.5366	0
nSSVEAFKR	1	P42892	N1(Deamidated)	0	0.000138	61.31	9.98467e-06	2	1038.52	-2.08238	15.7703	1
AcMnETR	1	P42892	C2(Carbamidomethyl); N4(Deamidated)	0	0.002445	55.44	4.14351e-06	2	882.344	0.00871028	9.0728	0
DYYLnKTENEK	1	P42892	N5(Deamidated)	0	4.993e-05	48.44	0.000107414	2	1417.65	2.26959	18.4483	1
FFnFSWR	1	P42892	N3(Deamidated)	0	0.00395	35.8	0.00172283	2	1004.46	0.905165	41.0795	0
HLLEnSTASVSEAER	1	P42892	N5(Deamidated)	0	1.76e-06	27.19	0.0207219	2	1643.79	0.87269	21.6409	0
AcMnETRIEELR	1	P42892	C2(Carbamidomethyl); N4(Deamidated)	0.001	0.02806	20.08	0.0976839	3	1522.7	0.478316	22.9317	1
AQDPSEVLTMLTnETGFEISSSDATVK	1	Q12905	N13(Deamidated)	0	8.095e-07	45.5	0.00043544	3	2871.37	7.51878	51.6391	0
GHAYSVTGAEEVESnGSLQK	2	P17655	N15(Deamidated)	0	7.208e-12	114.92	3.3016e-11	3	2063.95	-1.09561	21.5951	0
GIQLYDGPINIQncTFR	1	Q8WUJ3	N13(Deamidated); C14(Carbamidomethyl)	0	1.362e-10	82.43	9.34368e-08	2	2009.98	1.64568	40.3219	0
LNNAWQScPHNnVTGIAFEDVPITSR	1	Q8WUJ3	C8(Carbamidomethyl); N12(Deamidated)	0	1.411e-12	61.57	1.02752e-05	3	2941.39	-0.223361	36.2286	0
HILIDNGGELHAGSALcPFQGnFTIILYGR	1	Q8WUJ3	C17(Carbamidomethyl); N22(Deamidated)	0	7.782e-10	31.97	0.00937113	3	3284.67	3.9654	46.2935	0
TPLVQEVHQnFSAWcSQVVR	2	O00754	N10(Deamidated); C15(Carbamidomethyl)	0	1.884e-11	73.78	7.62204e-07	2	2386.16	1.53681	36.802	0
LnQTEPVAGNYYPVNTR	1	O00754	N2(Deamidated)	0	7.869e-10	72.75	9.31702e-07	2	1936.94	1.7655	28.7018	0
VGATAAVYSAAILEYLTAEVLELAGnASK	1	P0C0S5	N26(Deamidated)	0	1.274e-08	51.99	5.84981e-05	3	2896.54	6.03027	59.4957	0
MYnGSVPFEER	1	P22413	N3(Deamidated)	0	2.516e-06	68.28	5.42367e-07	2	1329.58	2.30523	27.9972	0
cSFYKnNTK	1	P22413	C1(Carbamidomethyl); N6(Deamidated)	0	1.929e-05	47.43	9.8491e-05	2	1162.52	0.473085	12.5341	1
IILnFTSLDLYR	1	P13497	N4(Deamidated)	0	1.49e-08	81.72	6.96531e-08	2	1468.81	0.302293	48.7585	0
LnGSITSPGWPK	1	P13497	N2(Deamidated)	0	1.32e-06	70.98	1.08128e-06	2	1257.65	1.22139	29.6326	0
VWPDGVIPFVIGGnFTGSQR	1	P13497	N14(Deamidated)	0	7.767e-08	64.22	6.37676e-06	3	2147.09	-1.36035	52.9358	0
VIEEFYnQTWVHR	2	P11166	N7(Deamidated)	0	1.453e-10	91.6	1.21416e-08	2	1721.83	1.44542	31.3641	0
MDPPcTnTTAASTYLNNPYVR	2	P10619	C5(Carbamidomethyl); N7(Deamidated)	0	9.286e-13	77.01	1.89114e-07	2	2387.07	3.56093	35.0205	0
FYATnDTEVAQSNFEALQDFFR	1	P10619	N5(Deamidated)	0	1.041e-08	74.39	3.14787e-07	2	2614.18	3.19447	51.5347	0
EAGnITTDGYEILGK	1	Q99715	N4(Deamidated)	0	8.521e-11	87.84	2.409e-08	2	1581.77	0.696158	34.884	0
NLQVYnATSNSLTVK	1	Q99715	N6(Deamidated)	0	8.766e-07	50.94	0.000134901	2	1652.85	0.818039	29.3764	0
LSALDNLLnHSSMFLK	2	Q9Y4L1	N9(Deamidated)	0	3.307e-10	98.31	2.39064e-09	2	1803.94	3.95282	43.5372	0
VFGSQnLTTVK	1	Q9Y4L1	N6(Deamidated)	0	1.977e-06	77.38	2.39481e-07	2	1194.64	0.813193	25.855	0
GYYnQSEAGSHTLQR	1	P30464;Q9TNN7;P30508;P30466;Q95604	N4(Deamidated)	0	6.789e-12	101.03	6.86308e-10	2	1711.77	3.16703	17.4112	0
InTTADEKDPTNPFRFPNIGVEK	2	O14672	N2(Deamidated)	0	1.021e-10	53.71	7.42669e-05	3	2604.3	3.33381	33.6762	2
nISQVLEK	1	O14672	N1(Deamidated)	0	0.001306	42.18	0.000998812	2	931.51	0.765606	27.1385	0
EGIcnGFTALcPASDPKPnFTDcNR	1	O14672	C4(Carbamidomethyl); N5(Deamidated); C11(Carbamidomethyl); N19(Deamidated); C23(Carbamidomethyl)	0	1.603e-07	41.31	0.000203391	3	2843.21	1.306	36.5746	0
LDMSQnVSLVTAELSK	1	Q99808	N6(Deamidated)	0	9.698e-13	110.66	1.70514e-10	2	1735.88	1.55641	43.7248	0
FKLEWLGncSGLNDETYGYK	3	P05026	N8(Deamidated); C9(Carbamidomethyl)	0	2.857e-10	91.22	7.09787e-09	3	2395.1	2.72185	38.515	1
YLQPLLAVQFTnLTMDTEIR	1	P05026	N12(Deamidated)	0	2.813e-10	76.08	3.74838e-07	2	2367.22	-0.905899	53.0116	0
VLGFKPKPPKnESLETYPVmK	2	P05026	N11(Deamidated); M20(Oxidation)	0	2.315e-13	54.13	4.05685e-05	3	2419.3	2.15365	24.4092	1
VLGFKPKPPKnESLETYPVMK	3	P05026	N11(Deamidated)	0	5.265e-12	50.97	7.27849e-05	3	2403.3	1.98227	25.942	1
VASVININPnTTHSTGScR	2	P13473	N10(Deamidated); C18(Carbamidomethyl)	0	1.581e-09	86.02	3.67551e-08	2	2028.98	1.04887	23.7611	0
IAVQFGPGFSWIAnFTK	1	P13473	N14(Deamidated)	0	7.701e-08	54.35	5.47251e-05	3	1883.97	0.136522	52.5158	0
YETTnKTYK	2	P13473	N5(Deamidated)	0	6.853e-05	49.23	0.000118205	2	1148.55	1.20164	9.60093	1
WQMnFTVR	1	P13473	N4(Deamidated)	0	0.002048	34.43	0.0027404	2	1082.51	1.92567	33.1647	0
VQPFnVTQGK	1	P13473	N5(Deamidated)	0	0.001353	30.5	0.0134579	2	1118.58	0.596375	23.8735	0
LnSSTIK	1	P13473	N2(Deamidated)	0.001	0.02662	47.93	0.000242402	2	763.419	-0.364384	14.24	0
GYYnQSEAGSHTIQR	1	P30464;Q9TNN7;P30508;P30466;Q95604	N4(Deamidated)	0	6.789e-12	101.03	6.86308e-10	2	1711.77	3.16703	17.4112	0
LDSFGPINPTLnTTYSFLTTFFK	2	P07686	N12(Deamidated)	0	2.686e-11	103.64	7.37436e-10	3	2625.32	1.79959	56.5012	0
MTPNLLHLAPENFYISHSPnSTAGPScTLLEEAFRR	1	P07686	N20(Deamidated); C27(Carbamidomethyl)	0	1.022e-11	15.61	0.413558	4	4071.97	1.03639	41.4168	1
GYYnQSEAGSHTWQR	2	P30479	N4(Deamidated)	0	6.831e-10	93.1	1.66525e-09	2	1784.77	1.86876	19.6612	0
GYYnQSEAGSHTLQR	1	P30464;Q9TNN7;P30508;P30466;Q95604	N4(Deamidated)	0	6.789e-12	101.03	6.86308e-10	2	1711.77	3.16703	17.4112	0
RYHQPGHEAVTSAVDQLQQEFHccGSnNSQDWR	2	P48509	C23(Carbamidomethyl); C24(Carbamidomethyl); N27(Deamidated)	0	8.251e-11	42.54	0.00015044	4	3942.71	0.625278	28.4371	1
GcPEDAAVcAVDKnGSK	2	P11717	C2(Carbamidomethyl); C9(Carbamidomethyl); N14(Deamidated)	0	1.35e-11	79.89	5.74365e-08	2	1778.77	3.22819	19.1924	1
HGNLYDLKPLGLnDTIVSAGEYTYYFR	2	P11717	N13(Deamidated)	0	4.343e-13	63.63	7.28298e-06	3	3120.54	1.16326	44.1898	0
MnFTGGDTcHK	1	P11717	N2(Deamidated); C9(Carbamidomethyl)	0	1.037e-05	58.4	2.09589e-06	2	1268.5	0.364641	16.0557	0
TnITLVcKPGDLESAPVLR	1	P11717	N2(Deamidated); C7(Carbamidomethyl)	0	5.327e-07	46.05	0.000322807	2	2084.11	2.12739	34.3555	0
IKTnITLVcKPGDLESAPVLR	1	P11717	N4(Deamidated); C9(Carbamidomethyl)	0	5.288e-09	29.7	0.00530402	3	2325.29	2.57314	31.6537	1
mnFTGGDTcHK	1	P11717	M1(Oxidation); N2(Deamidated); C9(Carbamidomethyl)	0	9.238e-07	26.57	0.00219771	2	1284.5	1.27777	12.0767	0
EGFSAnYSVLQSSVSEDFK	1	O14786	N6(Deamidated)	0	1.887e-11	94.75	3.24916e-09	2	2094.95	2.07171	41.0362	0
GPEcSQnYTTPSGVIK	1	O14786	C4(Carbamidomethyl); N7(Deamidated)	0	1.23e-11	65.08	3.13561e-06	2	1738.8	2.3365	24.4883	0
IGYSNnGSDWK	1	O14786	N6(Deamidated)	0	1.37e-06	55.32	1.2485e-05	2	1241.54	-0.0699215	22.1232	0
RGPEcSQnYTTPSGVIK	2	O14786	C5(Carbamidomethyl); N8(Deamidated)	0	4.213e-09	54.08	5.54994e-05	2	1894.9	1.47566	20.759	1
DLGPTLAnSTHHNVR	4	P04062	N8(Deamidated)	0	9.762e-12	88.92	2.35949e-08	2	1632.81	2.22334	19.7514	0
DYnSSREDSLQDAWDYVQAQVK	2	P27701	N3(Deamidated)	0	9.475e-11	78.04	1.03644e-07	3	2618.17	0.793157	43.1151	1
DYnSSR	1	P27701	N3(Deamidated)	0.001	0.04382	16.39	0.0229071	2	742.299	-1.01202	5.65282	0
EGDnITLK	1	Q13740	N4(Deamidated)	0	0.003096	72.84	6.55195e-07	2	890.446	-0.635428	19.8166	0
NAIKEGDnITLK	1	Q13740	N8(Deamidated)	0	2.902e-07	61.34	1.30009e-05	2	1316.71	1.33497	19.9095	1
IIISPEEnVTLTcTAENQLER	1	Q13740	N8(Deamidated); C13(Carbamidomethyl)	0	3.958e-07	39.32	0.0023273	2	2431.21	2.80958	38.819	0
RnATGDYK	1	Q13740	N2(Deamidated)	0.001	0.04043	19.4	0.0935745	2	925.437	-0.0570614	7.22047	1
GYYnQSEAGSHTLQR	1	P30464;Q9TNN7;P30508;P30466;Q95604	N4(Deamidated)	0	6.789e-12	101.03	6.86308e-10	2	1711.77	3.16703	17.4112	0
DFEDLYTPVnGSIVIVR	1	P02786	N10(Deamidated)	0	7.342e-10	51.19	0.000131917	2	1937.99	-0.149748	49.9579	0
KQNNGAFnETLFR	1	P02786	N8(Deamidated)	0	0.0005002	20.76	0.112068	2	1539.76	0.842961	25.4948	1
KQnNGAFnETLFR	2	P02786	N3(Deamidated); N8(Deamidated)	0	0.003087	11.35	1.07359	3	1540.74	0.710173	27.8091	1
GPMNQcLVATGTHEPKnQSYMVR	2	Q03405	C6(Carbamidomethyl); N17(Deamidated)	0	1.304e-14	61.52	8.0335e-06	3	2619.21	0.670653	23.6066	1
nQSYMVR	1	Q03405	N1(Deamidated)	0	0.006966	42.38	0.000286158	2	898.41	1.2025	18.7107	0
GcGYLPGcPGSnGFHNnDTFHFLK	1	Q03405	C2(Carbamidomethyl); C8(Carbamidomethyl); N12(Deamidated); N17(Deamidated)	0	9.146e-05	11.33	0.242948	4	2698.15	1.40582	35.231	0
LTGSDVNLLAENLLSPEDMVLFHnLTQPR	1	P01130	N24(Deamidated)	0	2.535e-16	100.7	1.39161e-09	3	3237.65	0.281236	54.503	0
GYYnQSEAGSHTLQR	1	P30464;Q9TNN7;P30508;P30466;Q95604	N4(Deamidated)	0	6.789e-12	101.03	6.86308e-10	2	1711.77	3.16703	17.4112	0
GYYnQSEAGSHTLQSMYGcDVGPDGR	1	Q04826	N4(Deamidated); C19(Carbamidomethyl)	0	4.461e-12	62.53	1.08902e-06	3	2850.18	2.15498	28.9756	0
HLYTTTGGETDFTnVTSLR	1	Q99523	N14(Deamidated)	0	2.501e-13	105.8	3.27468e-10	2	2114.01	2.53712	31.1571	0
LAnNTHQHVFDDLR	4	Q99523	N3(Deamidated)	0	3.095e-11	78.06	2.07899e-07	2	1680.81	0.198952	21.4069	0
SScGKEnTSDPSLVIAFGR	2	P11279	C3(Carbamidomethyl); N7(Deamidated)	0	2.175e-13	84.23	5.17274e-08	2	2025.96	1.6605	30.5003	1
SGPKnMTFDLPSDATVVLnR	1	P11279	N5(Deamidated); N19(Deamidated)	0	6.334e-09	61.42	1.44582e-05	3	2164.06	2.22992	38.4886	1
YSVQLMSFVYnLSDTHLFPnASSK	3	P11279	N11(Deamidated); N20(Deamidated)	0	1.053e-13	58.01	2.47465e-05	3	2750.31	1.29468	51.0429	0
GHTLTLnFTR	2	P11279	N7(Deamidated)	0	0.008731	50.96	0.000143901	3	1160.6	-1.46187	25.4134	0
KDnTTVTR	1	P11279	N3(Deamidated)	0	0.0001383	49.25	0.000167579	2	935.479	-0.0563236	6.85871	1
nMTFDLPSDATVVLnR	1	P11279	N1(Deamidated); N15(Deamidated)	0	1.479e-05	24.61	0.0525828	2	1794.86	3.68621	48.2497	0
SGPKnmTFDLPSDATVVLnR	1	P11279	N5(Deamidated); M6(Oxidation); N19(Deamidated)	0	0.0002373	15.6	0.526058	3	2180.06	1.24242	35.5235	1
NNVITLnITGK	1	P16278	N7(Deamidated)	0	1.292e-05	48.45	0.000190043	2	1187.67	2.0002	31.6004	0
TVLTPATNHMGnVTFTIPANR	1	P01024	N12(Deamidated)	0	3.279e-07	47.87	0.000275169	3	2256.15	1.80008	33.2276	0
YPHNHHVVnNTLEGncSSK	3	P15586	N9(Deamidated); N15(Deamidated); C16(Carbamidomethyl)	0	9.745e-14	75.47	1.95816e-07	3	2208.98	2.59461	14.99	0
TPMTnSSIQFLDNAFR	1	P15586	N5(Deamidated)	0	2.846e-08	69.65	1.32781e-06	2	1842.87	0.679172	42.9814	0
GPGIKPnQTSK	1	P15586	N7(Deamidated)	0	4.617e-07	52.96	5.1847e-05	2	1127.61	0.387839	10.1182	0
MLVANIDLGPTILDIAGYDLnKTQMDGMSLLPILR	1	P15586	N21(Deamidated)	0	7.218e-06	19.14	0.0993477	3	3816.02	4.17789	56.4547	1
GASnLTWR	1	P15586	N4(Deamidated)	0.002	0.0687	28.31	0.0205123	2	905.448	0.0233029	22.5028	0
AKLDAFFALEGFPTEPnSSSR	2	P08294	N17(Deamidated)	0	2.965e-11	65.74	4.78701e-06	2	2285.11	2.19056	43.0174	1
LDAFFALEGFPTEPnSSSR	1	P08294	N15(Deamidated)	0	2.642e-07	50.4	0.000130874	2	2085.98	4.04297	49.2143	0
MDKSDAVSHTGnYTcEVTELTR	2	Q08722	N12(Deamidated); C15(Carbamidomethyl)	0	2.535e-16	107.98	1.21008e-10	3	2515.11	2.37734	25.9887	1
SDAVSHTGnYTcEVTELTR	2	Q08722	N9(Deamidated); C12(Carbamidomethyl)	0	7.165e-10	66.57	1.42089e-06	3	2140.95	1.14187	27.1438	0
KnASNMEYR	1	Q9Y639	N2(Deamidated)	0	0.0001128	53.42	2.13844e-05	2	1113.5	1.47899	10.3208	1
AnATIEVK	1	Q9Y639	N2(Deamidated)	0	0.0031	45.63	0.000511495	2	846.456	-1.00197	17.1706	0
DSPVLPVTLQcnLTSSSHTLTYSYWTK	1	Q9Y639	C11(Carbamidomethyl); N12(Deamidated)	0	1.473e-08	44.68	0.000588906	3	3099.5	0.354033	44.601	0
KKEnGMPMDIVnTSGR	1	Q9Y639	N4(Deamidated); N12(Deamidated)	0	0.0006512	14.07	0.585654	2	1778.85	3.35176	24.4965	2
AKGnGSSQPGTAR	1	Q9UL25	N4(Deamidated)	0	8.703e-08	78.05	2.13862e-07	2	1231.6	0.272468	4.88845	1
GnGSSQPGTAR	1	Q9UL25	N2(Deamidated)	0	6.489e-05	52.96	2.42796e-05	2	1032.47	0.689322	6.56424	0
WSFSnGTSWR	1	Q99519	N5(Deamidated)	0	0.0004976	26.24	0.012003	2	1228.54	1.52975	32.5772	0
VnLTLR	1	Q99519	N2(Deamidated)	0.006	0.1886	41.31	0.00124254	2	716.431	0.78774	24.2212	0
EQYIHEnYSR	2	O60568	N7(Deamidated)	0	4.315e-07	61.45	4.22525e-06	2	1339.59	1.65435	16.7613	0
SAEFFnYTVR	1	O60568	N6(Deamidated)	0	0.0002722	51.79	5.33084e-05	2	1234.58	1.56812	32.2952	0
FDVSAMEKnASNLVK	2	P61812	N9(Deamidated)	0	1.3e-13	98.34	2.24229e-09	2	1653.82	0.748946	34.5209	1
LTSPPEDYPEPEEVPPEVISIYnSTR	1	P61812	N23(Deamidated)	0	1.841e-06	59.54	1.70651e-05	2	2959.42	3.99302	44.558	0
ISLHcPccTFVPSNNYIIPnKSEELEAR	2	P61812	C5(Carbamidomethyl); C7(Carbamidomethyl); C8(Carbamidomethyl); N20(Deamidated)	0	3.588e-08	43.89	0.000583897	4	3349.57	2.54056	32.6929	1
SYLGDGPLQHYIAVSSPTnTTYVVQYALAnLTGTVVnLTR	1	Q92542	N19(Deamidated); N30(Deamidated); N37(Deamidated)	0	1.696e-11	98.02	1.83792e-09	3	4300.17	0.314938	56.3575	0
TSLELWMHTDPVSQKnESVR	1	Q92542	N16(Deamidated)	0	6.54e-11	50.98	0.00014324	3	2358.14	1.69222	29.5691	1
nISGVVLADHSGAFHNK	2	Q92542	N1(Deamidated)	0	2.023e-06	34.06	0.00636085	3	1766.88	-0.0249619	25.5545	0
RPnQSQPLPPSSLQR	1	Q92542	N3(Deamidated)	0	0.0001539	17.29	0.290222	3	1705.9	-0.126619	20.2887	0
TAVncSSDFDAcLITK	2	P13987	N4(Deamidated); C5(Carbamidomethyl); C12(Carbamidomethyl)	0	1.663e-09	100.94	4.22824e-10	2	1802.8	1.9078	32.3793	0
SYSTTYEERnITGTR	2	Q15758	N10(Deamidated)	0	1.662e-08	48.14	0.000195664	2	1778.82	2.37492	19.6852	1
HTGPGILSMANAGPNTnGSQFFIcTAK	1	P62937	N17(Deamidated); C24(Carbamidomethyl)	0	1.367e-08	56.86	2.84367e-05	2	2792.31	0.0317732	39.0647	0
VDnITDQFcnASVVDPAcVR	1	O15118	N3(Deamidated); C9(Carbamidomethyl); N10(Deamidated); C18(Carbamidomethyl)	0	3.606e-12	97.12	1.66916e-09	2	2282.01	3.06485	40.2382	0
NYKNPnLTISFTAER	1	O15118	N6(Deamidated)	0	1.357e-08	53.28	7.23637e-05	2	1768.89	2.22239	27.9706	1
NYFHYnQSYPPTYNVK	2	P38571	N6(Deamidated)	0	3.131e-10	80	7.95e-08	2	2035.92	-0.466243	26.9456	0
NLnMSR	1	P38571	N3(Deamidated)	0.008	0.2587	31.36	0.00844466	2	735.346	1.09024	14.5962	0
ncTSISGDLHILPVAFR	2	P00533	N1(Deamidated); C2(Carbamidomethyl)	0	2.336e-12	85.43	4.55404e-08	2	1900.96	0.976095	42.1362	0
TcPAGVMGEnNTLVWK	2	P00533	C2(Carbamidomethyl); N10(Deamidated)	0	5.359e-08	56.88	2.68702e-05	2	1777.83	1.45058	33.5029	0
DSLSInATNIK	1	P00533	N6(Deamidated)	0	0.0002626	40.67	0.00169265	2	1176.61	0.360598	28.6892	0
EITGFLLIQAWPEnRTDLHAFENLEIIR	1	P00533	N14(Deamidated)	0	2.744e-11	35.09	0.00325229	3	3339.75	4.43538	51.2108	1
VKNVFnETK	1	P09603	N6(Deamidated)	0	5.297e-05	57.53	1.91615e-05	2	1079.57	-0.140476	16.5849	1
TVSnDSFFNFFAPPEVPESGDLDDDAEAILAADFEIGHFLR	2	P55209	N4(Deamidated)	0	0.009587	10.73	0.866411	3	4516.1	5.09114	56.6846	0
SVYAHFPINVVIQEnGSLVEIR	2	P32969	N15(Deamidated)	0	6.581e-10	58.34	2.00047e-05	3	2485.31	1.02365	43.9495	0
nVTHLLQQELTEAQK	1	Q10589	N1(Deamidated)	0	1.012e-10	85.93	3.61207e-08	2	1752.92	1.63022	35.7335	0
HRPTAGAFnHSDLDAELR	3	P09758	N9(Deamidated)	0	3.09e-15	84.82	5.02655e-08	3	2007.96	-0.51044	21.3617	0
HRPTAGAFnHSDLDAELRR	2	P09758	N9(Deamidated)	0	2.535e-16	54.4	7.27971e-05	4	2164.06	0.232314	20.0138	1
SFDDHFQHLLnDSER	2	P35052	N11(Deamidated)	0	1.005e-11	69.68	6.83555e-07	2	1860.82	2.59583	30.1785	0
IcPQGYTccTSEMEENLAnRSHAELETALR	1	P35052	C2(Carbamidomethyl); C8(Carbamidomethyl); C9(Carbamidomethyl); N19(Deamidated)	0	8.624e-08	10.5	0.3565	3	3541.55	1.60019	32.3413	1
LLFPTnSSSHLVALQGQPLVLEcIAEGFPTPTIK	2	P32004	N6(Deamidated); C23(Carbamidomethyl)	0	1.223e-10	77.61	1.23967e-07	3	3678.95	1.45297	52.7455	0
THnLTDLSPHLR	2	P32004	N3(Deamidated)	0	7.963e-07	63.32	7.9848e-06	3	1404.72	-0.710295	23.1278	0
DLQAnDTGR	1	P32004	N5(Deamidated)	0	0.0006348	48.32	8.31857e-05	2	990.45	1.4686	13.5268	0
FFPYAnGTLGIR	1	P32004	N6(Deamidated)	0	0.0004054	21.28	0.0919744	2	1356.7	0.923678	38.8087	0
VVLGAnGTYScLVR	1	Q5ZPR3	N6(Deamidated); C11(Carbamidomethyl)	0	6.576e-08	80.29	1.51536e-07	2	1509.78	2.71292	31.5301	0
TALFPDLLAQGnASLR	1	Q5ZPR3	N12(Deamidated)	0	1.075e-09	78.91	1.69015e-07	2	1687.9	1.78875	45.19	0
SVYncSGEAcR	1	P54802	N4(Deamidated); C5(Carbamidomethyl); C10(Carbamidomethyl)	0	4.897e-05	39.94	0.000101151	2	1303.51	1.5864	15.5711	0
VFPQVnVTK	1	P54802	N6(Deamidated)	0	0.0006713	32.38	0.00936516	2	1032.57	1.03298	26.5602	0
VLHnGTLAELQGLPHIR	1	Q13641	N4(Deamidated)	0	2.315e-12	86.23	1.79865e-08	3	1869.04	0.504039	30.3749	0
RPPLAELAALnLSGSR	1	Q13641	N11(Deamidated)	0	1.679e-11	50.3	8.11931e-05	2	1665.93	2.52436	35.0473	0
RPPLAELAALnLSGSRLDEVR	1	Q13641	N11(Deamidated)	0	6.776e-09	42.28	0.000343106	3	2278.25	0.965196	35.8973	1
LnETHIFnGSNWIMLIYK	2	P20645	N2(Deamidated); N8(Deamidated)	0	7.321e-09	73.9	6.94583e-07	3	2195.08	-0.737367	50.3213	0
EAGnHTSGAGLVQINK	2	P20645	N4(Deamidated)	0	9.096e-10	62.99	8.38912e-06	2	1596.8	1.96114	20.3531	0
DLcGPDAGPIGnATGQADcK	1	Q8NBI5	C3(Carbamidomethyl); N12(Deamidated); C19(Carbamidomethyl)	0	1.188e-14	108.66	3.74397e-11	2	2017.86	1.3721	30.0179	0
IGPGEPLELLcnVSGALPPAGR	2	Q969P0	C11(Carbamidomethyl); N12(Deamidated)	0	6.732e-12	83.18	7.14046e-08	2	2218.16	4.22522	49.1199	0
GETASLLcnISVR	1	Q969P0	C8(Carbamidomethyl); N9(Deamidated)	0	1.151e-07	63.96	7.31259e-06	2	1420.71	1.89683	34.0295	0
TAADTTGLQPILNQFTPAnISR	2	P06756	N19(Deamidated)	0	3.586e-10	92.12	9.94294e-09	2	2330.21	3.04301	45.0649	0
AnTTQPGIVEGGQVLK	1	P06756	N2(Deamidated)	0	1.604e-10	70.27	1.22164e-06	2	1612.86	1.97792	26.9727	0
ENQnHSYSLK	1	P06756	N4(Deamidated)	0	6.512e-07	48.62	8.03815e-05	2	1220.55	0.416039	13.0508	0
nMTISR	1	P06756	N1(Deamidated)	0.002	0.07228	33.92	0.00421729	2	722.349	-1.24114	16.5937	0
GWAPPDKSIInATDP	1	P35625	N11(Deamidated)	0	0.0001826	43.27	0.000612271	2	1582.78	1.76158	34.6308	1
LLANYASQnITYHcK	2	P08123	N9(Deamidated); C14(Carbamidomethyl)	0	9.207e-11	105.83	3.87906e-10	2	1796.87	2.41321	24.695	0
IQKDHHQASnSSR	1	O94907	N10(Deamidated)	0	1.755e-08	68.81	1.78871e-06	2	1508.72	1.81519	3.66382	1
DHHQASnSSR	3	O94907	N7(Deamidated)	0	0.0002987	39.81	0.000360428	3	1139.48	0.365055	1.56896	0
SQnDTVTPDVWYTSKPK	1	Q9BTY2	N3(Deamidated)	0	1.466e-10	48.08	0.000203831	3	1966.94	1.72595	26.6665	0
ILnQTADMLQLASK	1	Q9UKU9	N3(Deamidated)	0	1.896e-10	83.39	7.14701e-08	2	1546.82	0.726736	38.1203	0
YQHLATLAHnQSEIIAQLEEHcQR	2	Q9UKU9	N10(Deamidated); C22(Carbamidomethyl)	0	2.394e-11	27.11	0.0325848	3	2890.4	2.64634	30.39	0
QHTVTTTTKGEnFTETDVK	2	P04156	N12(Deamidated)	0	3.666e-14	87.81	2.87276e-08	2	2138.03	3.5832	17.584	1
HIPGLIHnMTAR	2	Q16610	N8(Deamidated)	0	5.806e-08	54.61	7.35121e-05	3	1360.71	-0.46293	23.4258	0
QGNnHTcTWK	1	Q16610	N4(Deamidated); C7(Carbamidomethyl)	0	6.027e-07	42.68	0.000153761	2	1246.53	1.99373	10.4843	0
HIPGLIHnmTAR	2	Q16610	N8(Deamidated); M9(Oxidation)	0	1.386e-06	35.9	0.00438252	3	1376.71	0.398657	19.0887	0
VWDTAVGLnHTAEPSLQTLER	1	Q9C0H2	N9(Deamidated)	0	7.525e-10	68.6	2.65724e-06	2	2338.17	1.17456	35.377	0
VQEVLnGTEVNLQHLTALVDcR	1	Q9C0H2	N6(Deamidated); C21(Carbamidomethyl)	0	3.741e-11	64.27	5.70519e-06	3	2509.27	-0.430139	41.9327	0
VVnSTTGTGEHLR	1	P35442	N3(Deamidated)	0	3.401e-09	69.52	1.31231e-06	3	1371.69	-0.529097	14.6301	0
ALSnISLR	1	O15031	N4(Deamidated)	0	0.001925	52.83	9.14697e-05	2	874.5	0.648592	25.7157	0
ncSFQPER	1	O15031	N1(Deamidated); C2(Carbamidomethyl)	0	0.01388	20.31	0.0311921	2	1038.44	4.10903	18.0665	0
LSHDAnETLPLHLYVK	1	O15031	N6(Deamidated)	0	2.508e-09	17.97	0.232998	3	1850.97	1.22467	29.3573	0
VPLQSAHLYYnVTEK	2	Q32P28	N11(Deamidated)	0	8.603e-13	95.1	5.16079e-09	2	1762.9	1.37426	27.2073	0
TYnGTNPDAASR	1	O60637	N3(Deamidated)	0	6.084e-07	76.31	9.35535e-08	2	1267.56	1.25348	13.9558	0
QLHccGIHnYSDWENTDWFKETK	2	O60637	C4(Carbamidomethyl); C5(Carbamidomethyl); N9(Deamidated)	0	1.244e-08	47.25	6.49859e-05	4	2969.26	0.4988	29.8264	1
ETKnQSVPLSccR	1	O60637	N4(Deamidated); C11(Carbamidomethyl); C12(Carbamidomethyl)	0	2.798e-06	31.17	0.00691271	2	1579.72	2.56218	16.3501	1
QLHccGIHnYSDWENTDWFK	1	O60637	C4(Carbamidomethyl); C5(Carbamidomethyl); N9(Deamidated)	0	3.981e-07	27.65	0.00438067	3	2611.08	2.88972	32.4604	0
IITVSTnGSIHSPR	2	Q9NRA1	N7(Deamidated)	0	7.517e-10	76.68	2.58814e-07	2	1482.79	0.60864	22.2356	0
KnITDLVEGAK	1	Q8IWA5	N2(Deamidated)	0	1.122e-08	83.12	9.21429e-08	2	1188.65	-0.175927	25.4261	1
TcNPETFPSSnESR	1	Q8IWA5	C2(Carbamidomethyl); N11(Deamidated)	0	2.955e-08	59.03	2.75057e-06	2	1626.67	1.0446	20.0558	0
GVLMVGnETTYEDGHGSRKnITDLVEGAK	2	Q8IWA5	N7(Deamidated); N20(Deamidated)	0	4.589e-09	42.67	0.000892245	3	3092.49	2.64235	30.9477	2
FVGTPEVnQTTLYQR	1	P01033	N8(Deamidated)	0	4.1e-09	68.96	1.84869e-06	2	1753.88	1.70499	30.7532	0
SHnRSEEFLIAGK	2	P01033	N3(Deamidated)	0	8.195e-07	54.25	6.29528e-05	2	1488.75	1.7978	19.9589	1
nASEIEVPFVTR	1	P07093	N1(Deamidated)	0	1.37e-05	42.66	0.00108671	2	1362.69	1.1291	41.2191	0
LASPPSQGEVPPGPLPEAVLALYnSTR	2	P01137	N24(Deamidated)	0	1.835e-11	63.29	6.61027e-06	3	2761.45	2.3917	49.6379	0
YSnNSWR	2	P01137	N3(Deamidated)	0.002	0.07428	21.47	0.0185342	2	927.397	1.3358	16.3164	0
LVnGSDR	1	Q9UGM3	N3(Deamidated)	0.001	0.04106	44.49	0.000579679	2	761.379	-0.421206	9.25474	0
NFVITYnRTYESKEEAR	1	Q9UBX1	N7(Deamidated)	0	5.818e-07	38.95	0.00229231	3	2121.03	1.07751	22.9937	2
ANIQFGDnGTTISAVSNK	1	Q14108	N8(Deamidated)	0	2.503e-08	80.54	1.47033e-07	2	1837.89	0.608918	29.9072	0
TMVFPVMYLnESVHIDKETASR	2	Q14108	N10(Deamidated)	0	2.085e-12	49.76	0.000182829	3	2568.25	1.98121	38.4237	1
ncTSLHTYKPR	2	P48745	N1(Deamidated); C2(Carbamidomethyl)	0	2.625e-08	70.86	1.11158e-06	2	1377.66	1.3402	14.358	0
GTFTDcALAnMTEQIR	1	P12110	C6(Carbamidomethyl); N10(Deamidated)	0	3.778e-08	95.78	2.10071e-09	2	1828.83	4.06116	38.4761	0
nMTLFSDLVAEK	1	P12110	N1(Deamidated)	0	2.518e-06	44.05	0.000566712	2	1368.67	2.18521	45.8328	0
GVFITnETGQPLIGK	1	P10253	N6(Deamidated)	0	1.95e-11	75.14	4.8379e-07	2	1574.85	3.05448	35.6959	0
nNTIVNELVR	2	P10253	N1(Deamidated)	0	0.0004275	56.79	2.93176e-05	2	1172.63	1.95523	33.7165	0
FLSSSPHLPPSSYFnASGR	1	O14773	N15(Deamidated)	0	1.512e-08	54.51	5.52236e-05	3	2051.98	0.631742	30.8796	0
TSKDPEHEGcYLSVGHSQPLEDcSFnMTAK	1	Q9Y5X9	C10(Carbamidomethyl); C23(Carbamidomethyl); N26(Deamidated)	0	1.884e-14	56.1	1.19053e-05	4	3425.48	2.65204	27.0678	1
VTQnLTLIEESLTSEFIHDIDR	1	P36955	N4(Deamidated)	0	1.336e-11	77.84	2.62277e-07	3	2574.29	-0.484737	52.0688	0
VTQnLTLIEESLTSEFIHDIDRELK	1	P36955	N4(Deamidated)	0	2.81e-10	62.96	7.41033e-06	4	2944.52	1.47141	51.4766	1
DHHGAnFScR	1	P05362	N6(Deamidated); C9(Carbamidomethyl)	0	8.173e-06	54.9	4.04492e-06	3	1201.49	4.04651	9.88635	0
AnLTVVLLR	1	P05362	N2(Deamidated)	0	0.0004664	54.09	3.23652e-05	2	999.621	1.38457	37.1746	0
LNPTVTYGnDSFSAK	1	P05362	N9(Deamidated)	0	1.263e-05	10.51	1.18708	2	1614.77	1.99568	27.6963	0
ncSAAPQPEPAAGLASYPELR	1	O75718	N1(Deamidated); C2(Carbamidomethyl)	0	1.02e-10	84.8	4.71862e-08	2	2200.04	1.65177	36.155	0
DTWGLSDEHFQPRPEAVQFFnVTTLQK	1	O75718	N21(Deamidated)	0	5.754e-12	40.77	0.00138611	3	3191.54	0.434154	43.3755	0
VTGLncTTNHPINPK	3	P08648	N5(Deamidated); C6(Carbamidomethyl)	0	4.39e-11	90.6	1.37177e-08	2	1666.83	2.36371	19.4557	0
DKLSPIHIALnFSLDPQAPVDSHGLRPALHYQSK	1	P08648	N11(Deamidated)	0	4.354e-07	16.52	0.145963	4	3765.98	2.93501	36.1701	1
AWGTPcEMcPAVnTSEYK	1	P35555	C6(Carbamidomethyl); C9(Carbamidomethyl); N13(Deamidated)	0	1.042e-08	61.73	1.67857e-06	2	2101.87	3.61855	31.5551	0
VLPVnVTDYcQLVR	1	P35555	N5(Deamidated); C10(Carbamidomethyl)	0	3.421e-09	61.35	1.28611e-05	2	1676.87	0.898653	40.3967	0
DAcGnGTcR	1	P35555	C3(Carbamidomethyl); N5(Deamidated); C8(Carbamidomethyl)	0	0.0007657	24.51	0.00353159	2	1011.36	0.260916	4.77945	0
FLFnLSSIPENEVISSAELR	1	P12644	N4(Deamidated)	0	1.099e-08	46.36	0.000386115	3	2266.16	-0.379653	51.9732	0
LVHHnVTR	1	P12644	N5(Deamidated)	0	0.003645	25.96	0.0349848	2	976.532	-0.356685	8.69748	0
GLLHLEnASYGIEPLQnSSHFEHIIYR	1	Q13443	N7(Deamidated); N17(Deamidated)	0	8.69e-12	42.76	0.00085011	4	3139.56	2.58188	38.0743	0
EGSGIGAIDSNLDWSHnFTNMLGYTDHQFTELTR	1	O75390	N17(Deamidated)	0	4.696e-12	36.61	0.00208451	4	3827.76	9.09636	46.8531	0
LTHLHEGLPVKnGTR	2	O00469	N12(Deamidated)	0	1.691e-05	54.77	4.75133e-05	4	1672.91	1.15989	16.8811	1
YncSIESPR	1	O00469	N2(Deamidated); C3(Carbamidomethyl)	0	0.0001356	42.31	0.000226183	2	1126.49	1.68293	18.5485	0
EAInITLDHK	2	O00469	N4(Deamidated)	0	0.0006804	20.8	0.110625	2	1154.61	1.30759	23.8473	0
nGSQAFVHWQEPR	1	P30530	N1(Deamidated)	0	4.298e-09	44.41	0.000396656	2	1556.73	1.83013	26.5461	0
VAcTSSQGPSSWTHWLPVETPEGVPLGPPEnISATR	1	P30530	C3(Carbamidomethyl); N31(Deamidated)	0	6.705e-07	31.11	0.0127786	3	3845.86	4.91669	44.7281	0
SLHVPGLnKTSSFScEAHNAK	1	P30530	N8(Deamidated); C15(Carbamidomethyl)	0	1.016e-06	29.67	0.01845	3	2285.1	-0.398779	22.5623	1
TVAANTPFnLScQAQGPPEPVDLLWLQDAVPLATAPGHGPQR	1	P30530	N9(Deamidated); C12(Carbamidomethyl)	0	1.924e-06	26.09	0.027064	3	4435.24	5.40467	51.7824	0
FINFFVGNTInSSYFPDHPLHSISVR	1	P08581	N11(Deamidated)	0	7.555e-10	30.99	0.0142911	4	3009.49	-0.508909	42.9141	0
nSSGcEAR	1	P08581	N1(Deamidated); C5(Carbamidomethyl)	0.001	0.02205	49.47	1.12712e-05	2	881.342	0.106893	3.27121	0
SAEGTFFInKTEIEDFPR	1	P06865	N9(Deamidated)	0	1.646e-09	58.32	1.95081e-05	2	2102.01	2.47846	37.1366	1
SAEGTFFInKTEIEDFPRFPHR	1	P06865	N9(Deamidated)	0	0.0001214	14.49	0.586792	4	2639.29	-0.0137023	34.1819	2
DLQAPLGQSFScSnSSIILSPAVHLDLLSLR	1	P34810	C12(Carbamidomethyl); N14(Deamidated)	0	2.411e-13	65.62	3.22135e-06	3	3339.73	0.650637	53.8514	0
VMYTTQGGGEAWGISVLNPnKTK	1	P34810	N20(Deamidated)	0	1.204e-09	52.65	9.42539e-05	3	2452.22	1.9456	34.144	1
FLVNVGQFnLSGALGTR	1	P01266	N9(Deamidated)	0	4.779e-10	93	6.66579e-09	2	1793.96	0.322429	47.1792	0
YSSnHTEHSQNLR	1	Q9Y2E5	N4(Deamidated)	0	3.544e-05	16.87	0.12027	3	1573.7	0.0072833	8.88222	0
LEnSSELHR	2	Q3V5L5	N3(Deamidated)	0	1.352e-05	55.29	2.83969e-05	2	1085.52	0.60565	13.5503	0
ELLLDFAnSSAELTGcLVR	1	Q86WC4	N8(Deamidated); C16(Carbamidomethyl)	0	3.792e-10	72.4	1.02428e-06	2	2109.06	2.27674	51.5755	0
MDnISR	1	Q86WC4	N3(Deamidated)	0.003	0.09421	34.43	0.00234376	2	736.329	-0.832936	12.5677	0
KcQEAInATcK	1	P78536	C2(Carbamidomethyl); N7(Deamidated); C10(Carbamidomethyl)	0	1.763e-09	87.01	1.49301e-08	2	1323.61	2.0227	11.0779	1
SEDIKnVSR	1	P78536	N6(Deamidated)	0	0.01018	21.11	0.11462	2	1048.53	-0.420059	12.7803	1
AVLVNnITTGER	1	Q8NBJ4	N6(Deamidated)	0	4.577e-06	76.75	3.83598e-07	2	1287.69	0.843796	26.1678	0
SIVYScEWPLYMWPFQKPnYTEIR	1	P06280	C6(Carbamidomethyl); N19(Deamidated)	0	7.534e-13	62.19	8.63647e-06	3	3108.47	1.44103	48.8504	0
EHEAQSnASLDVFLGHTNVEELMK	1	P00736	N7(Deamidated)	0	1.283e-11	78.04	2.22992e-07	3	2699.26	-0.400465	38.543	0
GInESYKK	1	P50897	N3(Deamidated)	0	0.001781	40.75	0.000744635	2	939.479	0.822977	10.3616	1
LVQAEYWHDPIKEDVYRnHSIFLADINQER	2	P50897	N18(Deamidated)	0	2.056e-05	26.07	0.0397948	3	3699.82	-0.0936604	34.8024	2
GnITEYQcHQYITK	2	Q92896	N2(Deamidated); C8(Carbamidomethyl)	0	9.38e-08	62.55	4.72519e-06	2	1755.8	1.1212	21.2039	0
IHnVTASDSGK	1	P78410	N3(Deamidated)	0	3.003e-08	74.12	2.80762e-07	2	1129.55	-0.260279	9.35464	0
SWPAVGncSSALR	1	P02790	N7(Deamidated); C8(Carbamidomethyl)	0	1.281e-06	67.62	1.72982e-06	2	1405.66	2.04034	27.6452	0
LnWTSLLPASFTK	1	Q6PIU2	N2(Deamidated)	0	3.624e-07	67.03	2.42737e-06	2	1478.79	2.29153	50.6598	0
VcEIHEDnSTR	1	Q29983	C2(Carbamidomethyl); N8(Deamidated)	0	5.042e-09	66.23	7.50431e-07	2	1360.58	0.941499	12.4868	0
LNnITIIGPLDMK	1	Q9NUM4	N3(Deamidated)	0	3.222e-08	66.02	3.41297e-06	2	1442.79	0.506739	41.9861	0
ITDIEnGSLANIPR	1	Q9BXN1	N6(Deamidated)	0	2.457e-07	65.51	4.23191e-06	2	1513.79	1.17975	31.8957	0
DKAGnTTESK	1	Q8WWY8	N5(Deamidated)	0	6.465e-06	64.9	2.37841e-06	2	1051.49	0.836114	2.84177	1
TSnISKPGTLER	1	Q9UBG0	N3(Deamidated)	0	1.679e-06	53.01	9.25064e-05	3	1303.69	0.0691151	15.9895	0
QAIHVGnQTFNDGTIVEK	1	Q9H3G5	N7(Deamidated)	0	1.898e-08	61.53	1.31123e-05	3	1971.98	2.0832	26.6	0
NnLTTYK	1	P48740	N2(Deamidated)	0	0.004516	60.95	5.78539e-06	2	854.423	-2.82772	15.8872	0
EIFVAnGTQGK	1	O95297	N6(Deamidated)	0	6.449e-06	55.55	4.49959e-05	2	1164.59	0.470714	23.2373	0
EEQFnSTYR	1	P01861	N5(Deamidated)	0	0.0003845	59.79	2.62386e-06	2	1174.5	1.67054	19.0221	0
ALAGLVYnASGSEHcYDIYR	1	Q9UHL4	N8(Deamidated); C15(Carbamidomethyl)	0	3.898e-12	58.42	1.54671e-05	3	2260.04	3.56411	33.0326	0
FAEInGSALcSYNLKPSEYTTSPK	1	Q8WWI5	N5(Deamidated); C10(Carbamidomethyl)	0	3.647e-11	57.97	2.1305e-05	3	2678.27	2.53921	33.1498	0
SLSnSTAR	1	P50454	N4(Deamidated)	0	0.005424	55.51	3.51488e-05	2	836.411	-0.136458	9.65905	0
LLncTAPGPDAAAR	1	Q8N697	N3(Deamidated); C4(Carbamidomethyl)	0	2.64e-06	53.76	5.51152e-05	2	1427.7	0.291889	24.4071	0
SIGSEPHEDHVFLVAnFSQIETLTSVFQK	2	O00339	N16(Deamidated)	0	1.743e-12	39.11	0.00199459	3	3260.62	2.56168	48.2097	0
FQVnNTRPPHVQLLR	2	P35475	N4(Deamidated)	0	3.791e-05	17.67	0.167582	3	1820	1.54353	25.5259	0
AGHFQnTSSPSAR	1	P36941	N6(Deamidated)	0	1.573e-06	51.35	4.61679e-05	2	1360.63	1.9765	12.3188	0
VFHIHnESWVLLTPK	2	O75882	N6(Deamidated)	0	4.748e-11	44.66	0.000507839	3	1820.97	0.87599	32.732	0
TFAnGSLAFR	1	Q8WWB7	N4(Deamidated)	0	0.000152	50.97	7.83838e-05	2	1084.54	1.28109	30.5496	0
ccLLPQAncSVHTAPPAEASMGTR	1	Q8NBP7	C1(Carbamidomethyl); C2(Carbamidomethyl); N8(Deamidated); C9(Carbamidomethyl)	0	2.275e-06	30.77	0.00615584	3	2629.17	2.22615	28.0678	0
KnLTLMATTSQLPK	1	P11117	N2(Deamidated)	0	6.147e-07	45.38	0.000341887	2	1546.85	1.04041	27.1026	1
nQSLVQDMDSMVR	1	Q8NHP8	N1(Deamidated)	0	1.001e-05	49.34	7.74144e-05	2	1523.69	1.90414	38.351	0
nSTSIYFK	1	P19256	N1(Deamidated)	0	0.0009626	49.23	0.000143279	2	960.468	0.852618	25.8424	0
GPIDInMSEIGMDYIHELFSKDPTIK	2	O43286	N6(Deamidated)	0	3.335e-11	47.24	0.000316239	4	2964.44	1.1824	51.2771	1
FIVESLTPSSLSLMHSPPGTQNISEInLSPMEISTFR	1	Q16706	N27(Deamidated)	0	1.204e-05	22.6	0.0686926	3	4061.04	3.78153	51.2238	0
DTGKDAVncTYKNEDDcVVR	1	P05106	N8(Deamidated); C9(Carbamidomethyl); C17(Carbamidomethyl)	0	6.253e-09	45.8	0.000132829	3	2360.02	3.03406	19.5294	2
ASQnITYHcK	1	P02461	N4(Deamidated); C9(Carbamidomethyl)	0	7.937e-06	45.32	0.000289358	2	1222.56	7.33007	12.3963	0
IAPASnVSHTVVLRPLK	1	P43308	N6(Deamidated)	0	1.151e-09	45.25	7.91126e-05	3	1803.05	0.351789	25.2638	0
FLKPYTLEEQKnLTVcPDGALFEQK	1	P54709	N12(Deamidated); C16(Carbamidomethyl)	0	1.676e-08	44.73	0.000538419	4	2969.5	0.202657	34.8898	1
FGEFGnYSLLVK	1	Q68CP4	N6(Deamidated)	0	4.086e-07	44.22	0.000656598	2	1374.7	2.90853	41.5088	0
LSnLSNLSHDLVQEAIDHAQDLQQEAnELSR	2	Q16363	N3(Deamidated); N27(Deamidated)	0	3.714e-07	23.8	0.0654485	4	3489.7	6.86501	48.7109	0
nTTGEHcEK	1	Q16363	N1(Deamidated); C7(Carbamidomethyl)	0	0.0001077	23.72	0.00423614	2	1076.43	-0.254013	3.2135	0
LHnETR	1	Q16363	N3(Deamidated)	0.006	0.1785	29.4	0.00648707	2	770.379	0.277519	4.83013	0
ESLNLWYDcTWNnDTK	1	P54852	C9(Carbamidomethyl); N13(Deamidated)	0	7.96e-09	41.67	0.000262096	2	2059.87	1.8495	41.433	0
SKGNPYSDLGnHTTcR	1	Q4KMQ2	N11(Deamidated); C15(Carbamidomethyl)	0	1.06e-09	23.41	0.0465158	3	1807.81	1.20894	15.5909	1
VGSTnVSTLVNVHFAPR	1	Q96J84	N5(Deamidated)	0	2.233e-09	41.57	0.000881233	3	1798.95	0.428819	32.6771	0
EKDLnETLLR	2	Q13253	N5(Deamidated)	0	0.008795	40.81	0.00166385	3	1231.65	-0.710502	23.6009	1
SNVIFYIVTLnNTADHLR	1	Q68CQ7	N11(Deamidated)	0	1.178e-05	40.49	0.00150522	2	2091.09	1.26724	43.8972	0
NWVDAHMNcEDIAMNFLVAnVTGK	1	Q93063	C9(Carbamidomethyl); N20(Deamidated)	0	2.962e-05	16.75	0.203952	3	2750.25	2.89104	47.4802	0
nGSLFAFR	1	P04004	N1(Deamidated)	0	0.001083	33.1	0.00435903	2	912.458	0.610522	36.0104	0
AGAInATYK	1	Q8N441	N5(Deamidated)	0	0.000283	38.78	0.00121177	2	909.468	0.649811	16.8886	0
GLYHLnLTVGGIPFHEK	1	Q14393	N6(Deamidated)	0	5.648e-05	30.48	0.0128933	3	1896	1.62102	34.6349	0
KnATQEALR	1	Q9NPF2	N2(Deamidated)	0	0.0001401	34.37	0.00506349	2	1031.55	0.803087	10.4503	1
nATQEALR	1	Q9NPF2	N1(Deamidated)	0.001	0.02638	27.66	0.0269948	2	903.449	-4.08311	15.7516	0
EPNVLIcFIDKFTPPVVnVTWLR	1	P01903	C7(Carbamidomethyl); N18(Deamidated)	0	4.652e-10	37.22	0.00181135	3	2758.46	0.434543	55.3708	1
LFnVTSTLR	1	Q9NZQ7	N3(Deamidated)	0	0.0002716	36.58	0.00192313	2	1051.58	1.87384	32.944	0
YFATncSATFGLEDDVVKK	1	Q9HB63	N5(Deamidated); C6(Carbamidomethyl)	0	3.607e-07	36.4	0.00273759	3	2166.01	1.42063	32.6203	1
AIGGIDWDSHPFGYnLTLQAK	1	Q14517	N15(Deamidated)	0	5.728e-08	36.04	0.00406928	3	2304.13	-0.399734	42.0922	0
FVLQnASR	1	Q9NXH8	N5(Deamidated)	0	0.003296	35.82	0.00399273	2	935.494	-0.44908	22.4178	0
LEnSTAPIR	1	Q6P9A2	N3(Deamidated)	0	0.007397	35.62	0.00466068	2	1001.53	1.32513	18.7004	0
AGPnGTLFVADAYK	1	Q9HDC9	N4(Deamidated)	0	0.0003712	11.95	1.04037	2	1424.71	2.17626	32.7618	0
SALLEFAcTHNLGncSTTAMK	1	Q9UIQ6	C8(Carbamidomethyl); N14(Deamidated); C15(Carbamidomethyl)	0	2.459e-05	34.61	0.00328642	3	2327.05	1.5641	31.7987	0
YHVLHInTTK	1	Q7LGA3	N7(Deamidated)	0	8.135e-07	34.55	0.00378812	3	1226.65	1.18427	18.1189	0
LMSTEASQnITYHcK	1	P02452	N9(Deamidated); C14(Carbamidomethyl)	0	4.167e-08	34.46	0.00293639	3	1783.8	0.0931456	20.8514	0
nVScLWcNTNK	1	P53801	N1(Deamidated); C4(Carbamidomethyl); C7(Carbamidomethyl)	0	0.0001724	31.13	0.00285234	2	1396.6	1.47943	29.2461	0
nATTPLWR	1	O75954	N1(Deamidated)	0	0.003608	33.77	0.00684207	2	959.495	0.961612	28.5577	0
LGVSSVPScYLIYPnGSHGLINVVKPLR	1	Q6ZRP7	C9(Carbamidomethyl); N15(Deamidated)	0	1.012e-07	33.16	0.00362294	4	3040.63	0.995653	39.7574	0
LLGVGEEVGGVLELFPInGSSVVEREDVPAHLVK	1	Q76M96	N18(Deamidated)	0	2.101e-07	32.85	0.00308686	4	3558.91	1.66692	48.3288	1
AMnTSQVEALGIQMLPGYRDPYHGRPLTK	1	Q8NBJ5	N3(Deamidated)	0	8.918e-08	30.63	0.0143585	4	3244.64	3.41776	34.7469	1
EERPLnASALK	2	O14657	N6(Deamidated)	0	0.002957	25.93	0.0344615	2	1228.65	0.586791	19.873	0
FnETTEK	1	P43652	N2(Deamidated)	0	0.006394	30.04	0.00465691	2	869.389	0.821951	10.5822	0
LcLNnDTK	1	P30825	C2(Carbamidomethyl); N5(Deamidated)	0	0.008308	27.72	0.0140307	2	978.457	0.864094	17.4933	0
VHHnQTGK	1	Q9NRA2	N4(Deamidated)	0	0.0004601	27.4	0.0232012	2	921.454	0.656535	1.54263	0
KLnVTTAWK	1	Q9BZM5	N3(Deamidated)	0	0.0004078	26.22	0.0212515	2	1061.6	0.487569	22.55	1
nVSVAEGK	1	Q9P2B2	N1(Deamidated)	0.006	0.1826	21.74	0.138331	2	804.404	-7.78997	13.6687	0
DVQIIVFPEDGIHGFnFTR	1	P43251	N16(Deamidated)	0	1.69e-05	22.44	0.100919	3	2205.1	0.817236	48.598	0
ScDSLNnRcEGSSVQTR	1	P07996	C2(Carbamidomethyl); N7(Deamidated); C9(Carbamidomethyl)	0	0.0001451	39.28	0.000324588	3	1970.83	1.56949	14.5798	1
AcTEAEFAcHSYnEcVALEYR	1	P98160	C2(Carbamidomethyl); C9(Carbamidomethyl); N13(Deamidated); C15(Carbamidomethyl)	0	5.03e-12	80.38	1.05365e-08	2	2581.05	2.7807	29.6024	0
LRNPcTSEQncTSPFSYK	2	P05556	C5(Carbamidomethyl); N10(Deamidated); C11(Carbamidomethyl)	0	5.444e-15	108.5	9.32275e-11	3	2189.96	0.773186	22.9649	1
NPcTSEQncTSPFSYK	1	P05556	C3(Carbamidomethyl); N8(Deamidated); C9(Carbamidomethyl)	0	6.885e-11	106.62	2.50437e-11	2	1920.78	1.56071	24.5089	0
SLDAYPILNQAQALEnHTEVQFQKEcGPDNKcESNLQMR	1	P26006	N16(Deamidated); C26(Carbamidomethyl); C32(Carbamidomethyl)	0	5.768e-10	21.58	0.0834029	4	4577.13	3.36137	35.8541	2
VNncSDMcFHQK	2	Q92626	N3(Deamidated); C4(Carbamidomethyl); C8(Carbamidomethyl)	0	2.227e-09	76.78	2.09397e-08	2	1540.6	1.04345	16.0446	0
RVNncSDMcFHQK	2	Q92626	N4(Deamidated); C5(Carbamidomethyl); C9(Carbamidomethyl)	0	3.879e-07	47.56	3.77084e-05	3	1696.7	0.912539	14.3244	1
VVnScHR	1	P48643	N3(Deamidated); C5(Carbamidomethyl)	0	0.009374	31.81	0.00227415	2	872.404	-0.206248	5.03644	0
FELLGcELnGcANPLGLKnNSIPDK	2	Q08431	C6(Carbamidomethyl); N9(Deamidated); C11(Carbamidomethyl); N19(Deamidated)	0	2.623e-14	82.06	9.9568e-08	3	2775.34	1.22744	42.9044	1
FELLGcELnGcANPLGLK	1	Q08431	C6(Carbamidomethyl); N9(Deamidated); C11(Carbamidomethyl)	0	5.825e-09	57.96	2.33535e-05	2	2005.97	1.13142	46.1609	0
nPcHNGGLcEEISQEVR	3	Q08431	N1(Deamidated); C3(Carbamidomethyl); C9(Carbamidomethyl)	0	2.829e-07	48.46	6.62908e-05	3	1999.86	1.6681	25.8153	0
GYAGnHcETK	1	Q08431	N5(Deamidated); C7(Carbamidomethyl)	0	3.914e-06	39.91	0.000188874	2	1137.46	0.284084	8.50883	0
IISAnGcKVDNSSLTGESEPQTR	1	P05023	N5(Deamidated); C7(Carbamidomethyl)	0	5.11e-12	73.51	6.39517e-07	3	2464.16	0.302192	23.6146	1
AIAnEcQANFISIKGPELLTmWFGESEANVR	2	P55072	N4(Deamidated); C6(Carbamidomethyl); M21(Oxidation)	0	3.223e-08	54.1	7.06117e-05	3	3512.71	7.87254	48.3846	1
LGLGNHnYcR	2	P00750	N7(Deamidated); C9(Carbamidomethyl)	0	0.002172	40.55	0.000651976	2	1204.56	5.55767	17.933	0
FQSSAVMALQEASEAYLVGLFEDTnLcAIHAK	1	Q71DI3	N25(Deamidated); C27(Carbamidomethyl)	0	5.37e-08	48.17	0.000253755	4	3514.7	4.61674	55.9014	0
TFKnESENTcQDVDEcQQNPR	3	P48960	N4(Deamidated); C10(Carbamidomethyl); C16(Carbamidomethyl)	0	3.593e-10	73.81	7.27844e-08	2	2600.07	2.74699	17.4617	1
GTQLMnGTSMSSPNAcGGIALILSGLK	2	P29144	N6(Deamidated); C16(Carbamidomethyl)	0	1.406e-05	39.05	0.00194767	2	2679.31	-0.800735	50.2553	0
AIHYALnccGLAGGVEQFISDIcPK	2	P21926	N7(Deamidated); C8(Carbamidomethyl); C9(Carbamidomethyl); C23(Carbamidomethyl)	0	8.187e-16	109.41	1.46626e-10	3	2794.31	1.96568	45.9779	0
FQSAAIGALQEASEAYLVGLFEDTnLcAIHAK	1	P84243	N25(Deamidated); C27(Carbamidomethyl)	0.003	0.09599	12.12	0.966675	3	3438.7	3.53318	56.5257	0
GPMNQcLVATGTHEPKnQSYMVR	2	Q03405	C6(Carbamidomethyl); N17(Deamidated)	0	1.304e-14	61.52	8.0335e-06	3	2619.21	0.670653	23.6066	1
LNEASFQPPPGVnIcDVNWK	1	Q16563	N13(Deamidated); C15(Carbamidomethyl)	0	8.124e-11	55.73	4.34364e-05	2	2286.09	2.32051	40.9022	0
