# Supplementary material for: Specific enrichment and glycosylation discrepancy profiling of cellular exosomes using a dual-affinity probe
Source: Royal Society of Chemistry journal article supplement (doi:10.1039/d1cc01530c), 2021-01-01
Supplement: d1cc01530c2.pdf [file d1cc01530c2.pdf]

## Supporting Information

### **Specific enrichment and glycosylation discrepancy profiling of cellular exosomes using a dual-affinity probe**

Ning Zhang<sup>1,2</sup>, Xufang Hu<sup>2</sup>, Haolin Chen<sup>2</sup>, Chunhui Deng<sup>\*1,2</sup> and Nianrong Sun<sup>\*1</sup>

<sup>1</sup>Department of Gastroenterology and Hepatology, Zhongshan Hospital, Fudan

University, Shanghai 200032, China

<sup>2</sup>Department of Chemistry, Fudan University, Shanghai 200043, China

## 10 Experiment section

11 **Chemicals.** 20×TBS and 1×PBS were purchased from Solarbio. Anti-TSG101 polyclonal  
12 antibody and goat anti-rabbit IgG (HRP conjugated) were purchased from MultiSciences  
13 (Lianke) Biotech. Sequencing grade trypsin was purchased from Promega. 1,1'-  
14 dioctadecyl-3,3,3',3'tetramethylindocarbocyanine perchlorate (DiI) were purchased from  
15 Meilun Biotechnology Company. Phosphotungstic acid hydrate was purchased from Alfa  
16 Aesar. Dithiothreitol (DTT), iodoacetamide (IAA), urea, thiourea, phenylmethanesulfonyl  
17 fluoride (PMSF), and trifluoroacetic acid (TFA) were purchased from Sigma-Aldrich.  
18 Titanium (IV) butoxide (TBOT) and glutathione (GSH) were purchased from Adamas beta.  
19 Iron chloride hexahydrate ( $\text{FeCl}_3 \cdot 6\text{H}_2\text{O}$ ), ethylene glycol, sodium acetate anhydrous and  
20 concentrated ammonia solution (28 wt%) were purchased from Guoyao Chemical Reagent  
21 Company. Acetonitrile (ACN) was purchased from Merck. Dulbecco's modified Eagle's  
22 medium (DMEM) and fetal bovine serum (FBS) were purchased from Thermo Scientific.

23 **Synthesis of  $\text{Fe}_3\text{O}_4@\text{TiO}_2\text{-GSH}$ .** Generally speaking,  $\text{FeCl}_3 \cdot 6\text{H}_2\text{O}$  and  $\text{CH}_3\text{COONa}$  were  
24 dispersed in 75 mL ethylene glycol to form  $\text{Fe}_3\text{O}_4$  nanoparticles via the solvo-thermal  
25 reaction. The above magnetic core and 1.6 mL titanium (IV) butoxide was dispersed in  
26 200 mL ethyl alcohol under the basic condition, keeping stirring violently at 45 °C for 24 h.  
27 Then  $\text{Fe}_3\text{O}_4@\text{TiO}_2$  were synthesized and calcined in a muffle furnace at 400 °C for 2 h.  
28 Next, the materials were redispersed in 30 mL water which containing 800 mg GSH. And  
29 the reaction was performed at room temperature for 20 h. Finally,  $\text{Fe}_3\text{O}_4@\text{TiO}_2\text{-GSH}$  was  
30 synthesized.

31 **Cell culture.** MCF-7 cells, MDA-MB-231 cells and Hela cells were cultured in petri dishes  
32 (100 mm diameter, 20 mm height) with 10% FBS, 89.5% DMEM and 0.5% penicillin-  
33 streptomycin and set in a humidified incubator with 5% CO<sub>2</sub> at 37 °C. The above  
34 supernatant was instead by condition media without FBS since 80% bottom area of the  
35 petri dish was covered by cells. After incubation for 24 h, the late supernatant was collected  
36 to capture exosomes.

37 **Preparation of exosomes samples originated from cells.** The collected supernatants of  
38 different cells were filtered with filter (0.22 µm) to remove apoptotic blebs, cell debris, and  
39 cells. Then the filtrates were concentrated through an ultrafiltration tube (Merck Millipore,  
40 100 kDa) and some proteins and peptides were removed together. Afterwards, the  
41 concentrate were dispersed in 1×TBS and stored at -80 °C for further use.

42 **Exosomes isolation.** First of all, 6.0 mg Fe<sub>3</sub>O<sub>4</sub>@TiO<sub>2</sub>-GSH were incubated with 1 mL pre-  
43 treated cell samples at 4 °C for 10 min. Secondly, the supernatants were removed with the  
44 effect of magnet and the sediments were washed three times with PBS. Finally, the  
45 enriched exosomes were eluted by 0.4 M ammonia aqueous solution for 10 min at 4 °C and  
46 the solvents were substituted by PBS with ultrafiltration tubes to keep exosomes activity.

47 **Exosomes dye.** 40 µg purified exosomes secreted by MCF-7 cells was incubated in 1×TBS  
48 buffer containing 10 µM DiI and placed on the shaker at 37 °C for 15 min in the dark. After  
49 reacting with Fe<sub>3</sub>O<sub>4</sub>@TiO<sub>2</sub>-GSH, the fluorescence intensity of supernatants and eluents  
50 were detected by fluorescence spectrometer (Hitachi, F-7000) at excitation and emission  
51 wavelengths of 545 nm and 570 nm to obtain the materials capture efficiency and exosomes

52 recovery. And the above steps were repeated three times in parallel to get an average result.

53 In addition, the same method was used for the other two kinds of exosomes from Hela cells

54 and MDA-MB-231 cells.

55 **Exosomes lysis and digestion.** Isolated exosomes were suspended in the urea lysis buffer

56 containing 8 M urea, 2 M thiourea and 1 mM PMSF and ultrasonicated for 15 min. After

57 centrifugation at 10,000 g for 5 min, the supernatant were substituted by 25 mM  $\text{NH}_4\text{HCO}_3$

58 buffer using ultrafiltration tubes (3 kDa). Following by heating for 10 min at 90 °C, the

59 proteins were reduced by 10 mM DTT at 56 °C for 1 h and alkylated by 25 mM IAA in the

60 dark at 37 °C for 0.5 h. Then trypsin was added in the samples (trypsin: protein=1:40, w/w),

61 and incubated at 37 °C for 16 h. Finally, the peptides were collected after desalting and

62 lyophilizing.

63 **Enrichment of exosomal N-linked glycopeptides.** Exosomes lysate were dispersed in 100

64  $\mu\text{L}$  90%ACN/3%TFA (v/v) solution and 800  $\mu\text{g}$   $\text{Fe}_3\text{O}_4@\text{TiO}_2\text{-GSH}$  were incubated in the

65 mixture at 37 °C for 0.5 h to capture glycopeptides. After washing by the above loading

66 buffer to remove impurities, the goal peptides were eluted by 50%ACN aqueous solution

67 for 45 min. Finally, the eluents were then deglycosylated in the mixture of 49  $\mu\text{L}$   $\text{NH}_4\text{HCO}_3$

68 (25 mM, pH = 7.8) and 1  $\mu\text{L}$  PNGase F.

69 **Nano-LC-MS/MS analysis.** The solvent A (water containing 0.1% formic acid) and

70 solvent B (ACN containing 0.1% formic acid) were prepared. The lyophilized eluent was

71 dissolved with 10  $\mu\text{L}$  solvent A. The captured peptides were separated by Nano-LC, and

72 on-line electrospray tandem mass spectrometry was used to analyze them. The experiments

73 were performed on an EASY-nLC 1000 system (Thermo Fisher Scientific, Waltham, MA)  
74 connected to an Orbitrap Fusion mass spectrometer (Thermo Fisher Scientific, San Jose,  
75 CA) equipped with an online nano-electrospray ion source. A 4  $\mu$ L peptide sample was  
76 loaded on the trap column (Thermo Scientific Acclaim PepMap C18, 100  $\mu$ m  $\times$  2 cm) and  
77 separated on the analytical column (Acclaim PepMap C18, 75  $\mu$ m  $\times$  25 cm) with a linear  
78 gradient, from 2% B to 40% B in 110 min. The column was re-equilibrated at initial  
79 conditions for 15 min with the column flow rate at 300 nL min<sup>-1</sup> and column temperature  
80 at 40 °C. A data-dependent mode was adopted in the Orbitrap Fusion mass spectrometer  
81 to switch automatically between MS and MS/MS acquisition. Survey full-scan MS spectra  
82 (m/z 350–1500) were gained in the Orbitrap with a mass resolution of 120,000 at m/z 200.  
83 The AGC target was set to 1,000,000 with maximum injection time at 50 ms. MS/MS  
84 acquisition was performed in the Orbitrap with a cycle time of 3 s. The threshold value of  
85 intensity was 50,000 and maximum injection time was 100 ms. The AGC target was set to  
86 200,000 with the isolation window at 2 m/z.

87 Tandem mass spectra were extracted using Proteome Discoverer software (Thermo  
88 Fisher Scientific, version 1.4.0.288). The human UniProtKB/Swiss-Prot database (Release  
89 2015-03-11, with 20199 sequences) was chosen as the database and Mascot (Matrix  
90 Science, London, UK; version 2.3.2) was used to analyze all MS/MS data. The enzyme  
91 was specified as trypsin. The parent ion mass tolerance and fragment ion mass tolerance  
92 were specified as 10.0 ppm and 50 mmu, respectively. Carbamidomethylation of cysteine  
93 was specified as the fixed modification. Meanwhile, variable modifications included

94 oxidation on methionine and deamidation on asparagine. The percolator algorithm was  
95 employed to make sure that peptide level false discovery rates (FDRs) were lower than 1%.  
96 The identified deamination sites were confirmed to be glycosylation sites only when they  
97 were consistent with the N-glycosylation consensus sequence (n-!P-[S/T/C]).  
98

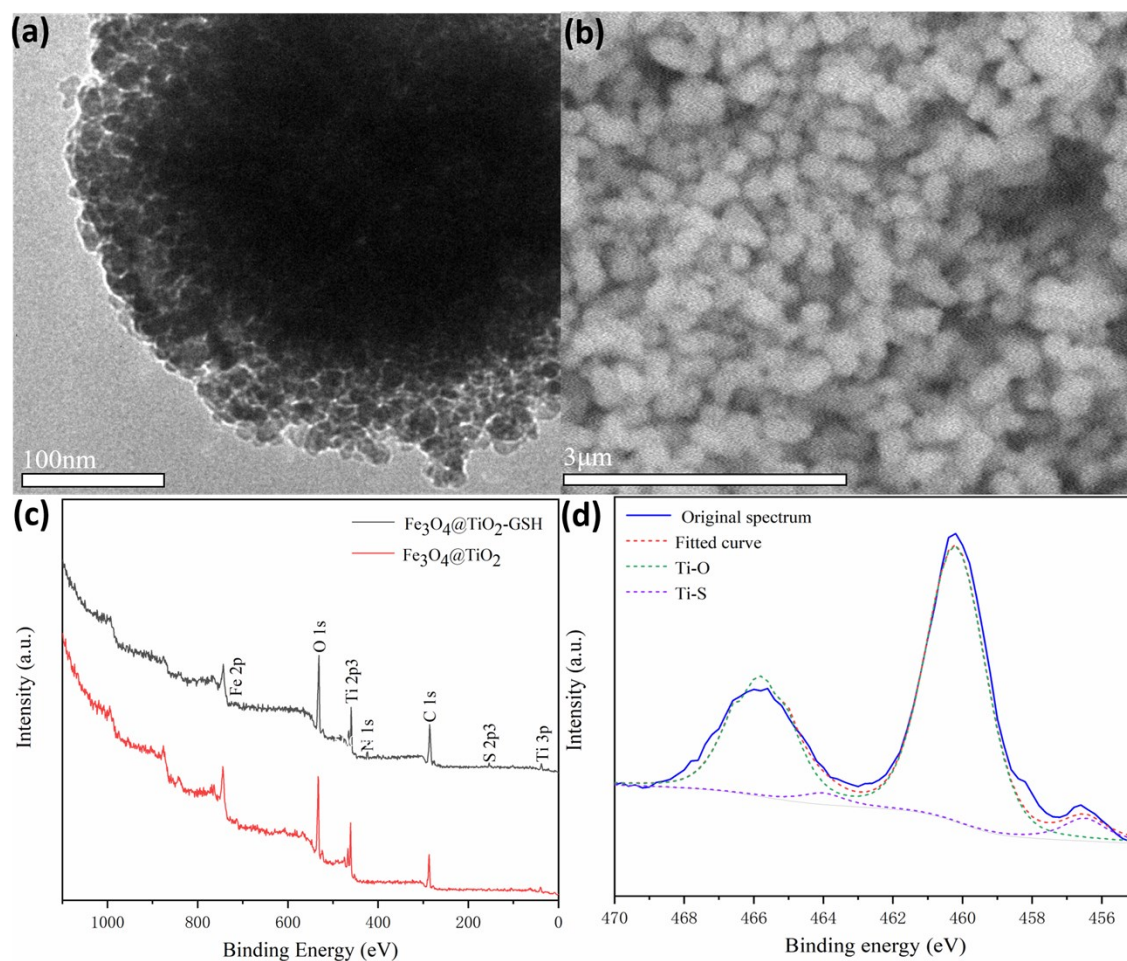

99  
 100 **Figure S1.** (a) TEM and (b) SEM image of Fe<sub>3</sub>O<sub>4</sub>@TiO<sub>2</sub>-GSH; (c) X-ray photoelectron  
 101 spectrum of Fe<sub>3</sub>O<sub>4</sub>@TiO<sub>2</sub> and Fe<sub>3</sub>O<sub>4</sub>@TiO<sub>2</sub>-GSH; (d) High-resolution XPS spectrum of Ti  
 102 2p.

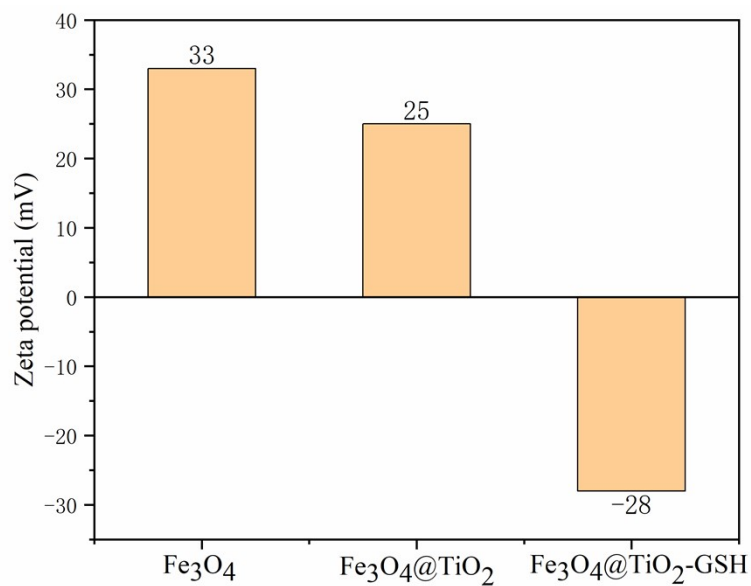

103

104 **Figure S2.** Zeta potential of Fe<sub>3</sub>O<sub>4</sub>, Fe<sub>3</sub>O<sub>4</sub>@TiO<sub>2</sub> and Fe<sub>3</sub>O<sub>4</sub>@TiO<sub>2</sub>-GSH.

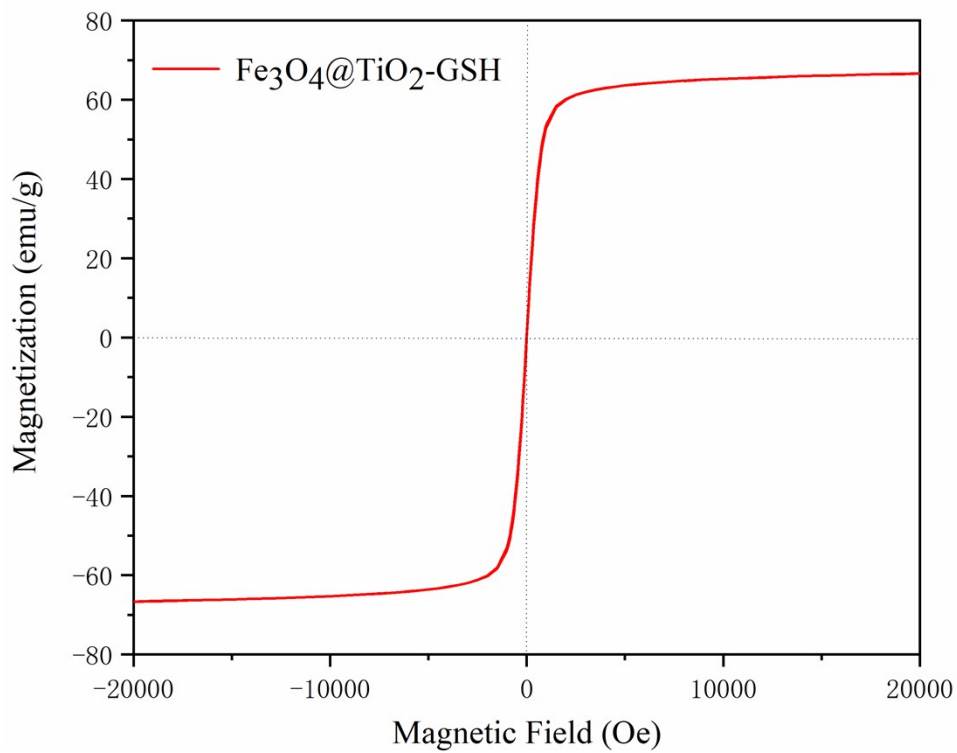

105

106 **Figure S3.** Magnetic hysteresis curves of Fe<sub>3</sub>O<sub>4</sub>@TiO<sub>2</sub>-GSH.

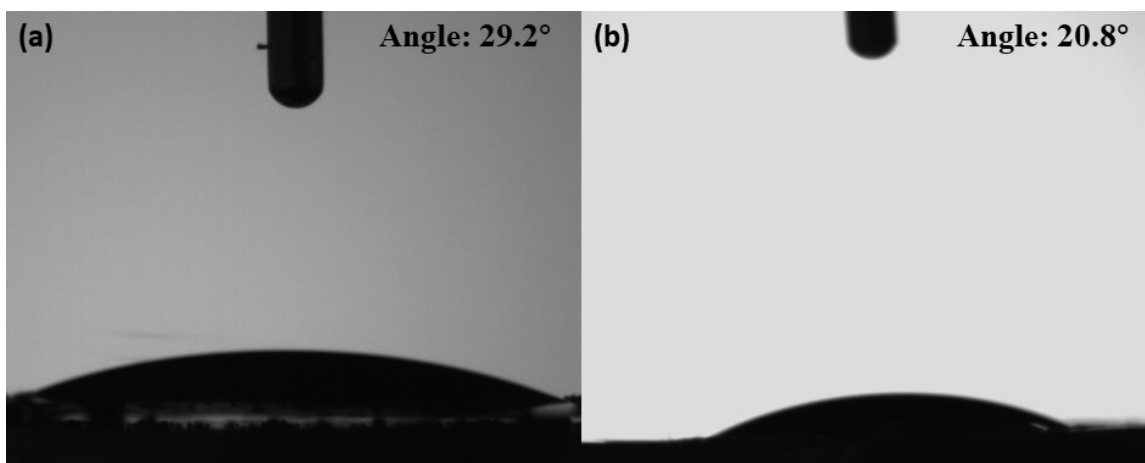

107

108 **Figure S4.** Contact angle of (a)  $\text{Fe}_3\text{O}_4@\text{TiO}_2$  and (b)  $\text{Fe}_3\text{O}_4@\text{TiO}_2\text{-GSH}$ .

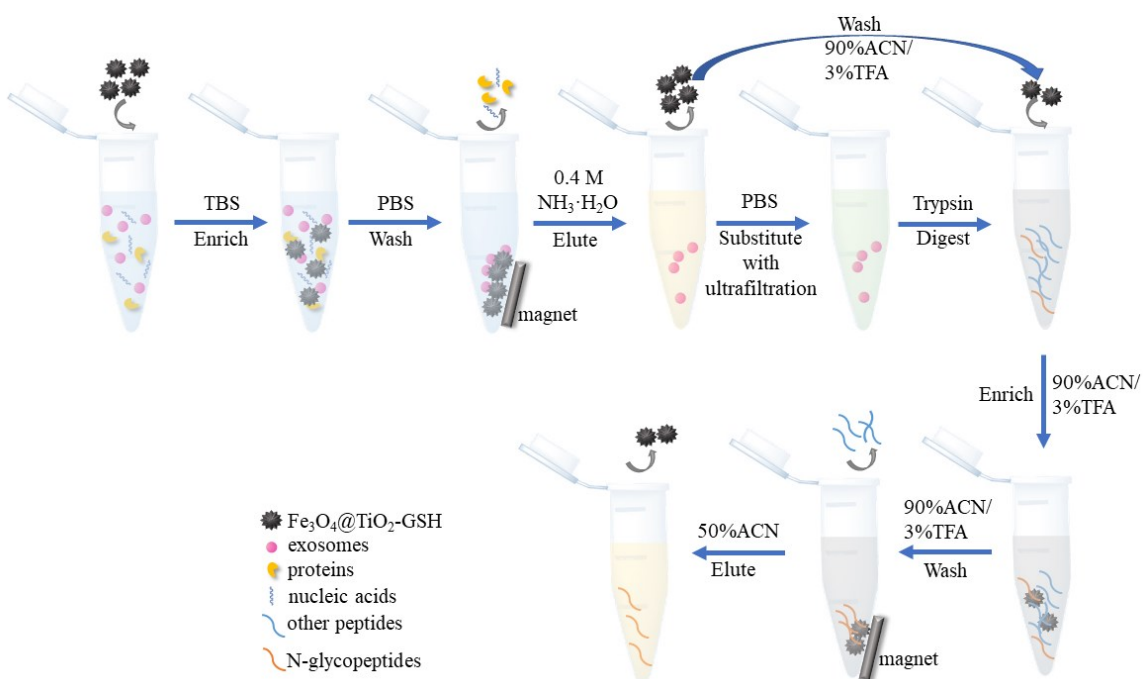

109

110 **Figure S5.** Workflow of exosomes and N-glycopeptides consecutive enrichment from cells

111 culture medium using  $\text{Fe}_3\text{O}_4@\text{TiO}_2\text{-GSH}$ .

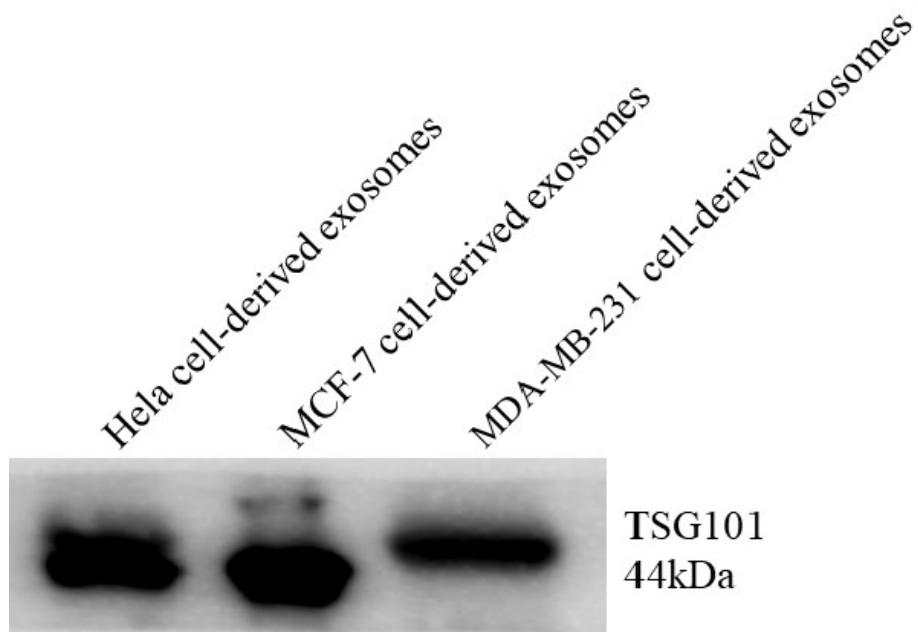

112

113 **Figure S6.** Western blot of TSG101 protein from HeLa cells, MDA-MB-231 cells and

114 MCF-7 cells derived exosomes isolated by  $\text{Fe}_3\text{O}_4@\text{TiO}_2\text{-GSH}$ .

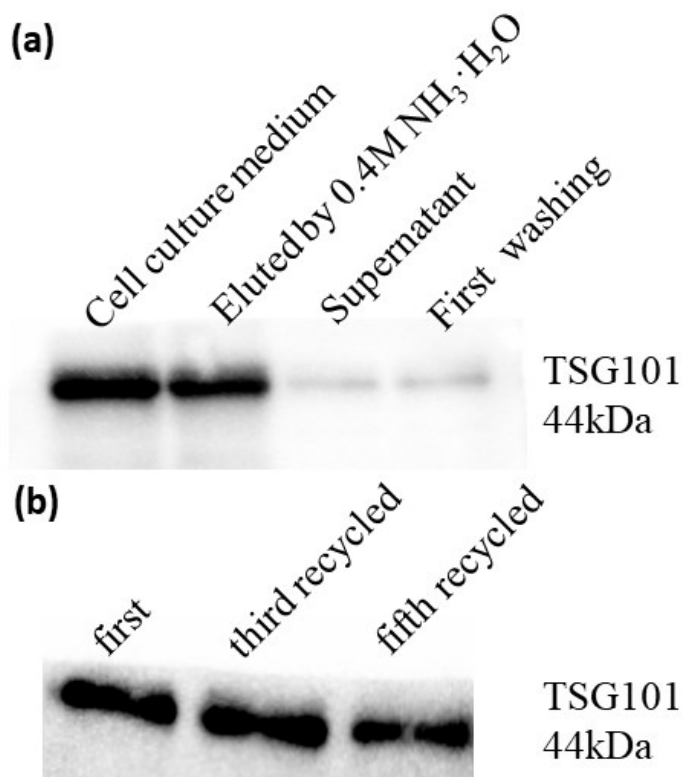

115

116 **Figure S7.** (a) Western blot results of TSG101 protein in isolated HeLa cells-derived

117 exosomes during the enrichment process with  $\text{Fe}_3\text{O}_4@\text{TiO}_2\text{-GSH}$ ; (b) Western blot results  
 118 of TSG101 protein in isolated MCF-7 cell-derived exosomes with first / third / fifth  
 119 recycled  $\text{Fe}_3\text{O}_4@\text{TiO}_2\text{-GSH}$ .

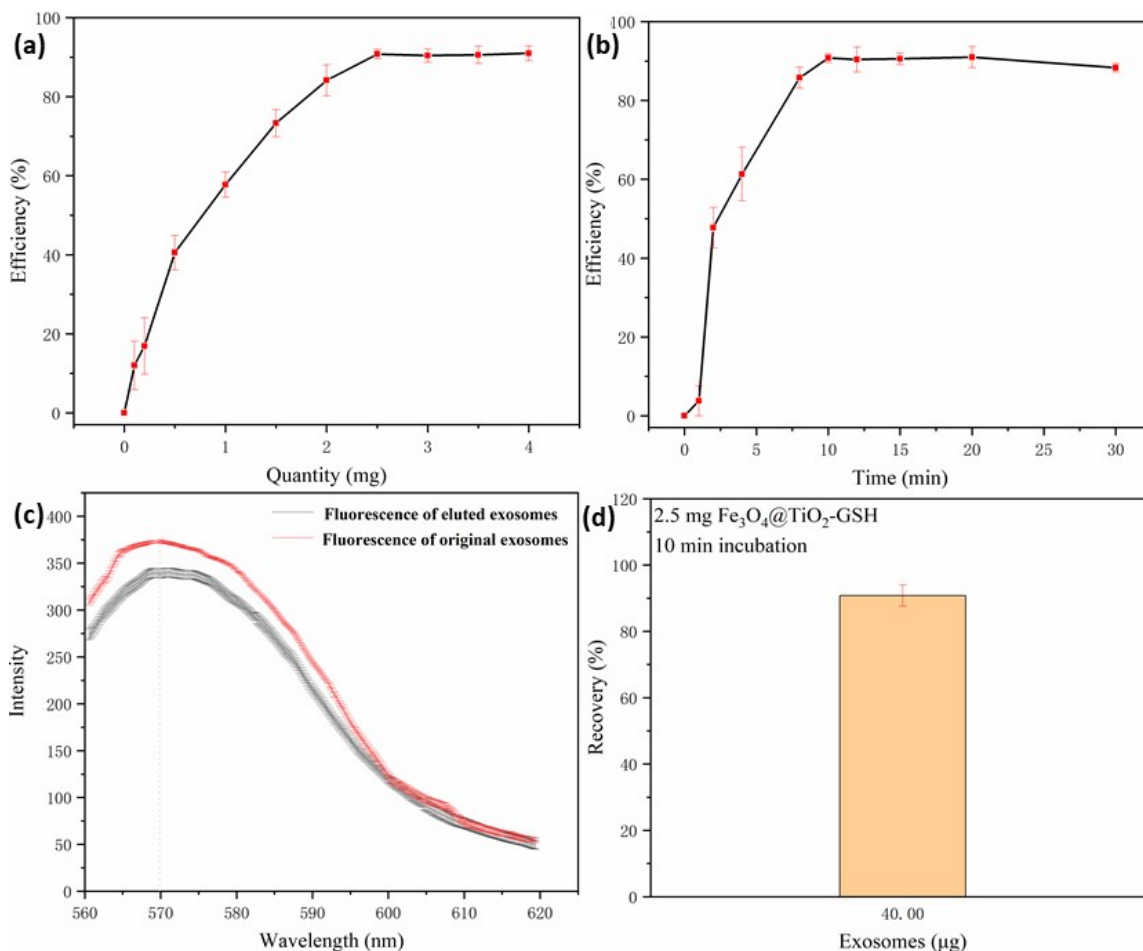

120  
 121 **Figure S8.** (a) Optimization of the quantity of  $\text{Fe}_3\text{O}_4@\text{TiO}_2\text{-GSH}$ ; (b) Optimization of  
 122 incubation time for exosome isolation; (c) Fluorescence curve of original purified  
 123 exosomes and eluted exosomes from  $\text{Fe}_3\text{O}_4@\text{TiO}_2\text{-GSH}$ ; (d) The recovery of exosomes  
 124 isolated by  $\text{Fe}_3\text{O}_4@\text{TiO}_2\text{-GSH}$  under the optimal condition.

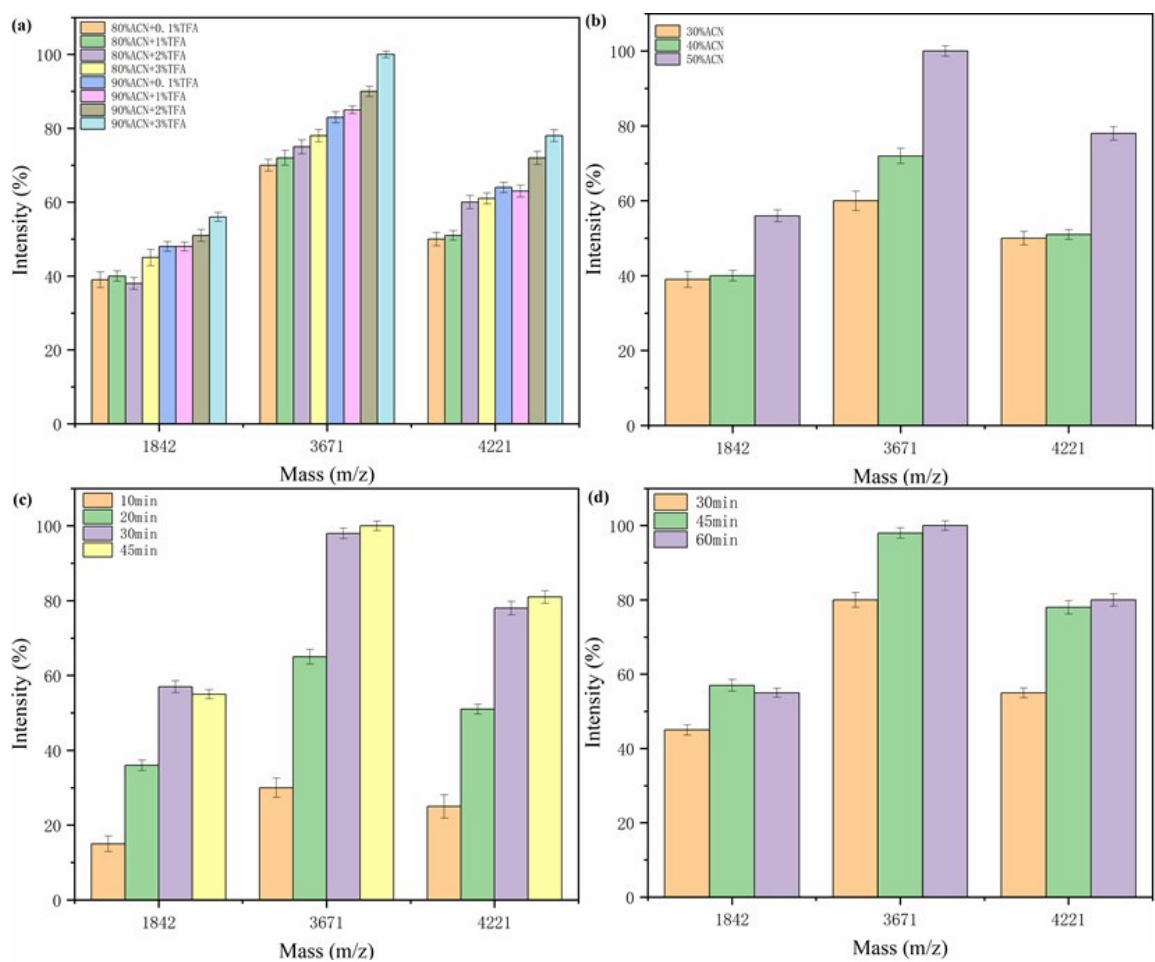

125

126 **Figure S9.** Optimization of (a) loading buffer, (b) elution buffer, (c) incubation time and

127 (d) elution time during the glycopeptides enrichment process with  $\text{Fe}_3\text{O}_4@\text{TiO}_2\text{-GSH}$ .

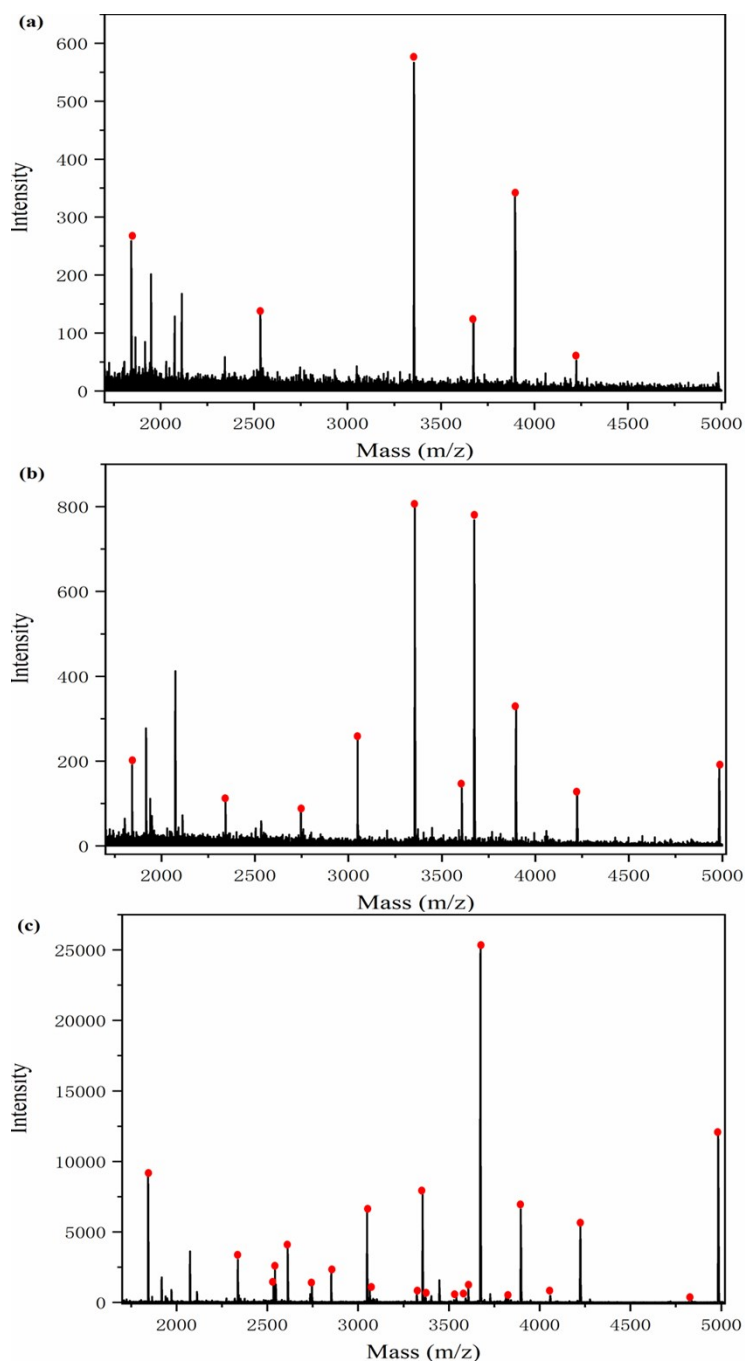

128

129 **Figure S10.** MALDI-TOF mass spectra of tryptic digested HRP (100 fmol  $\mu\text{L}^{-1}$ ): (a) before  
 130 enrichment; (b) after enrichment by  $\text{Fe}_3\text{O}_4@\text{TiO}_2$ ; (c) after enrichment by  $\text{Fe}_3\text{O}_4@\text{TiO}_2\text{-GSH}$ . Mass spectrometric peaks of N-glycopeptides are marked with red circles.  
 131

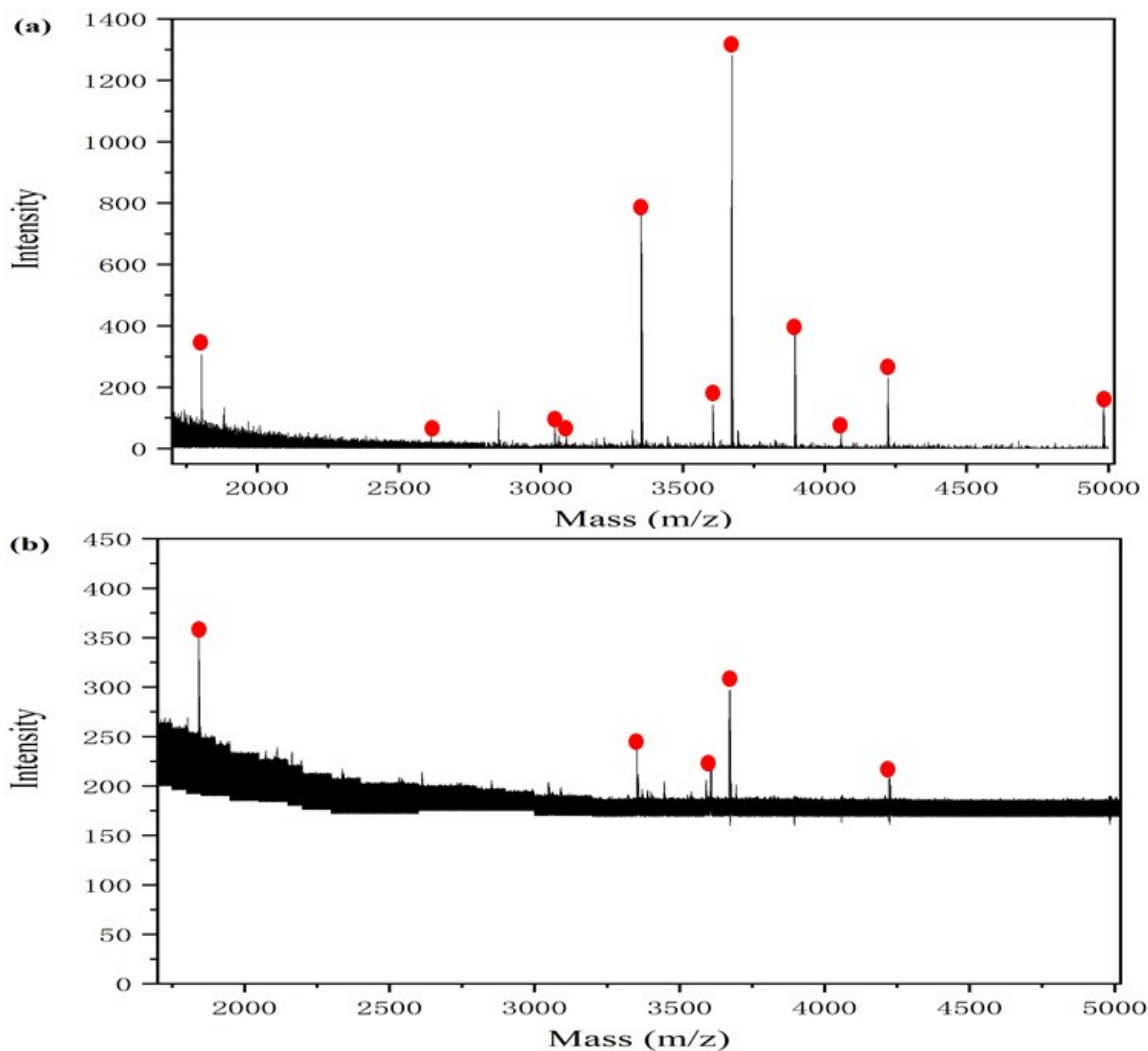

132

133 **Figure S11.** MALDI-TOF mass spectra of tryptic digested HRP after enrichment by  
 134  $\text{Fe}_3\text{O}_4@\text{TiO}_2\text{-GSH}$  with the concentration of: (a)  $5 \text{ fmol } \mu\text{L}^{-1}$  and (b)  $0.5 \text{ fmol } \mu\text{L}^{-1}$ . And  
 135 mass spectrometric peaks of glycopeptides are marked with red circles.

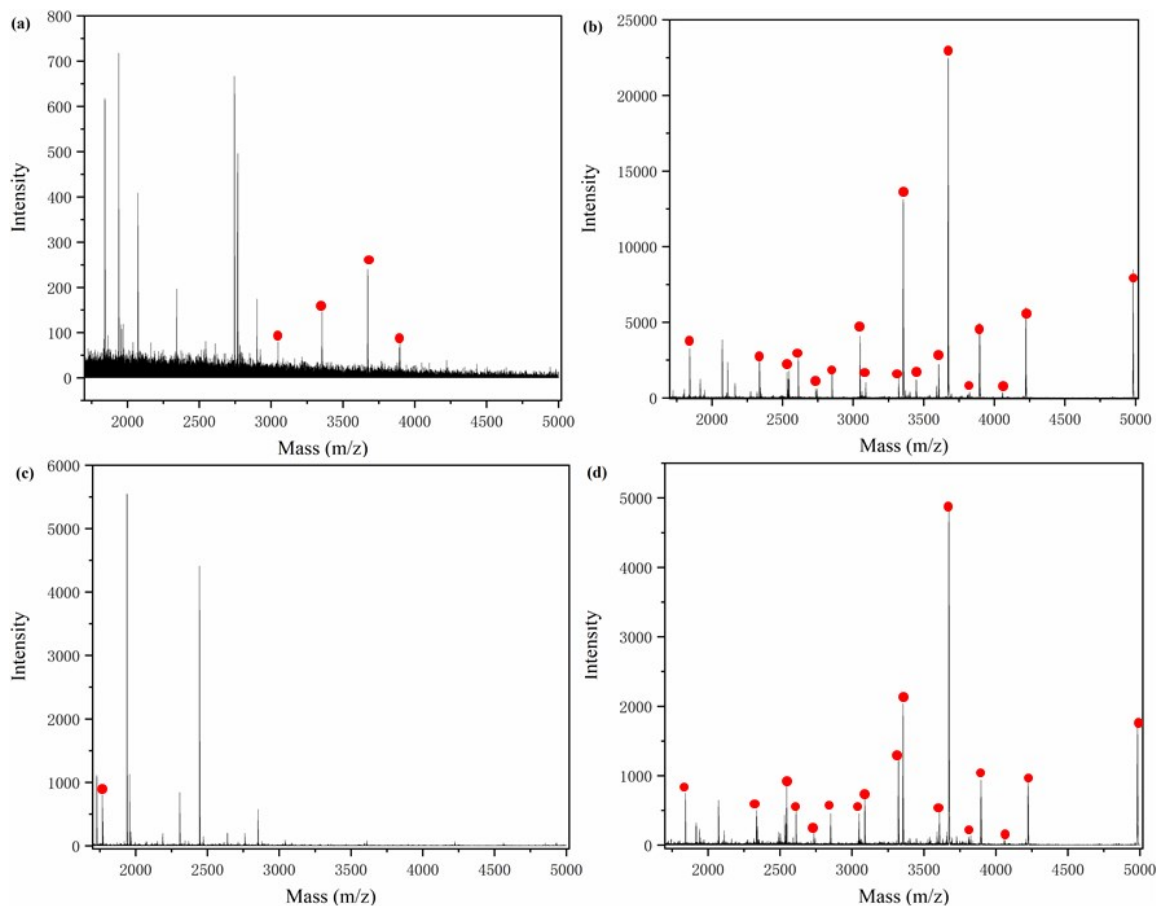

136

137 **Figure S12.** MALDI-TOF mass spectra for the glycopeptide enrichment from a mixture of  
 138 tryptic digests of HRP and BSA at a mass ratio of 1 : 10: (a) before and (b) after treatment  
 139 with  $\text{Fe}_3\text{O}_4@\text{TiO}_2\text{-GSH}$ ; (c) before and (d) after treatment with  $\text{Fe}_3\text{O}_4@\text{TiO}_2\text{-GSH}$  at a  
 140 mass ratio of 1 : 100 (HRP : BSA), where glycopeptides are marked with red circles.

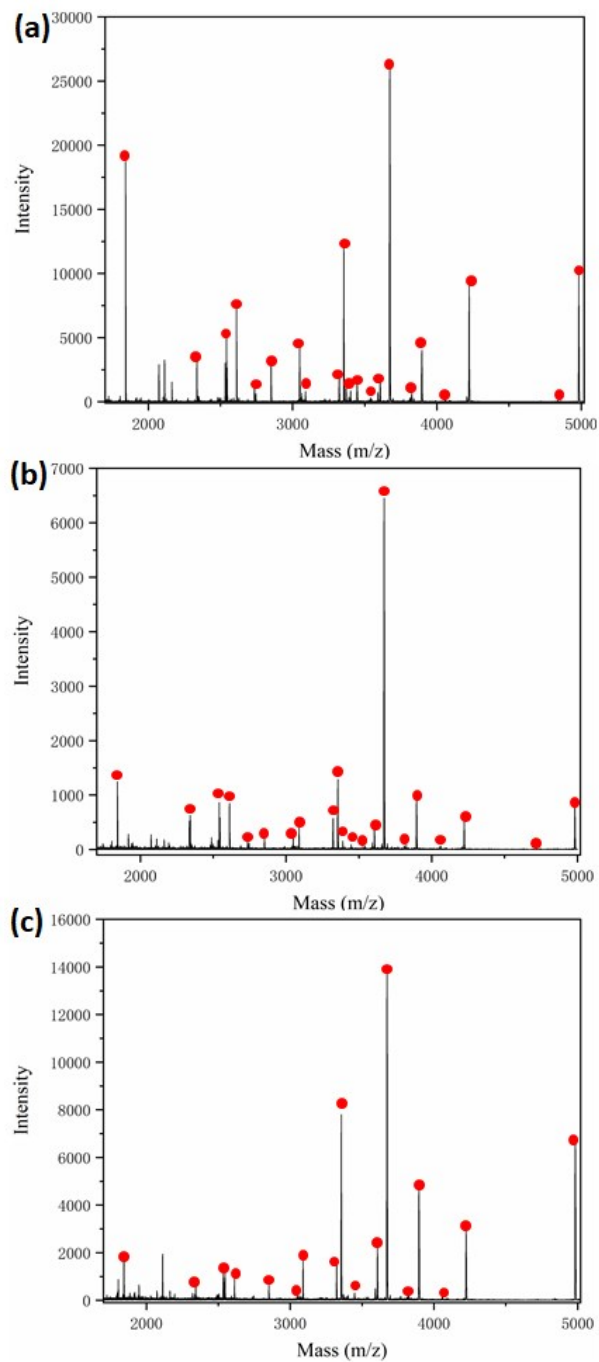

141

142 **Figure S13.** MALDI-TOF mass spectra of tryptic digested HRP after enrichment by first

143 (a)/ third (b)/ fifth (c) recycled  $\text{Fe}_3\text{O}_4@\text{TiO}_2\text{-GSH}$ .

(a)

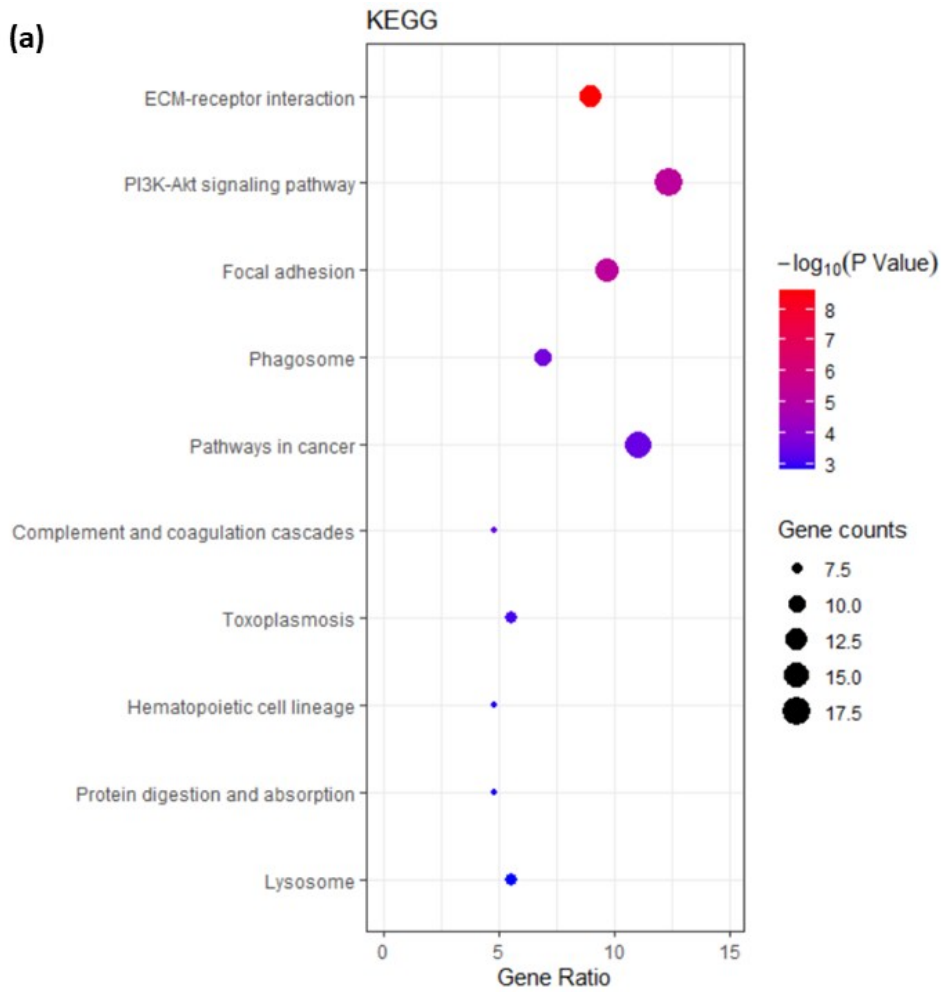

144

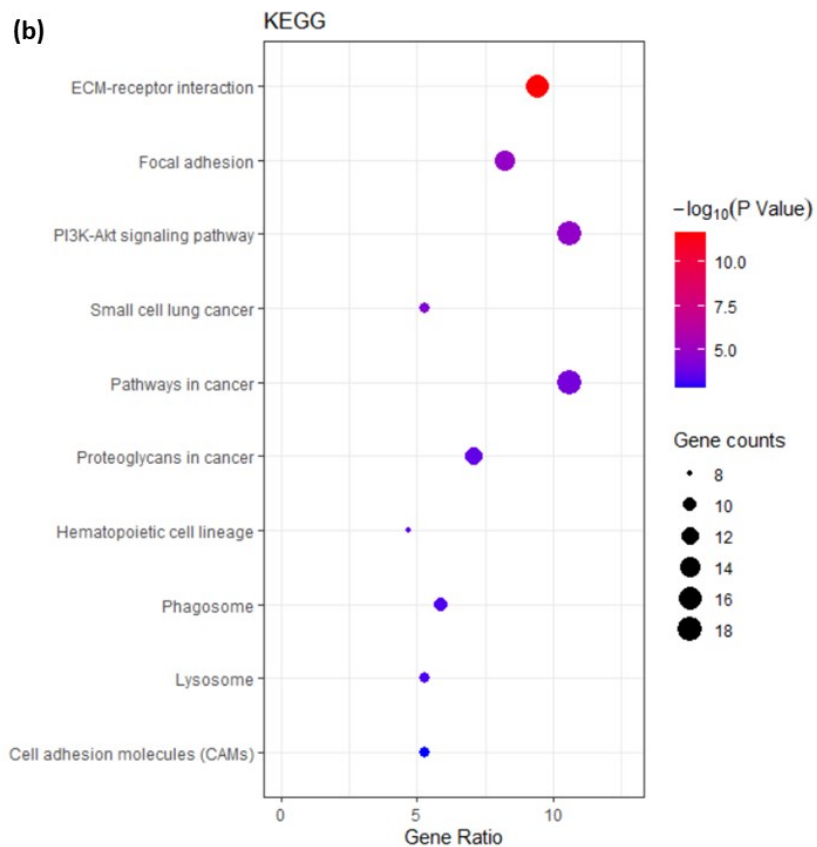

145

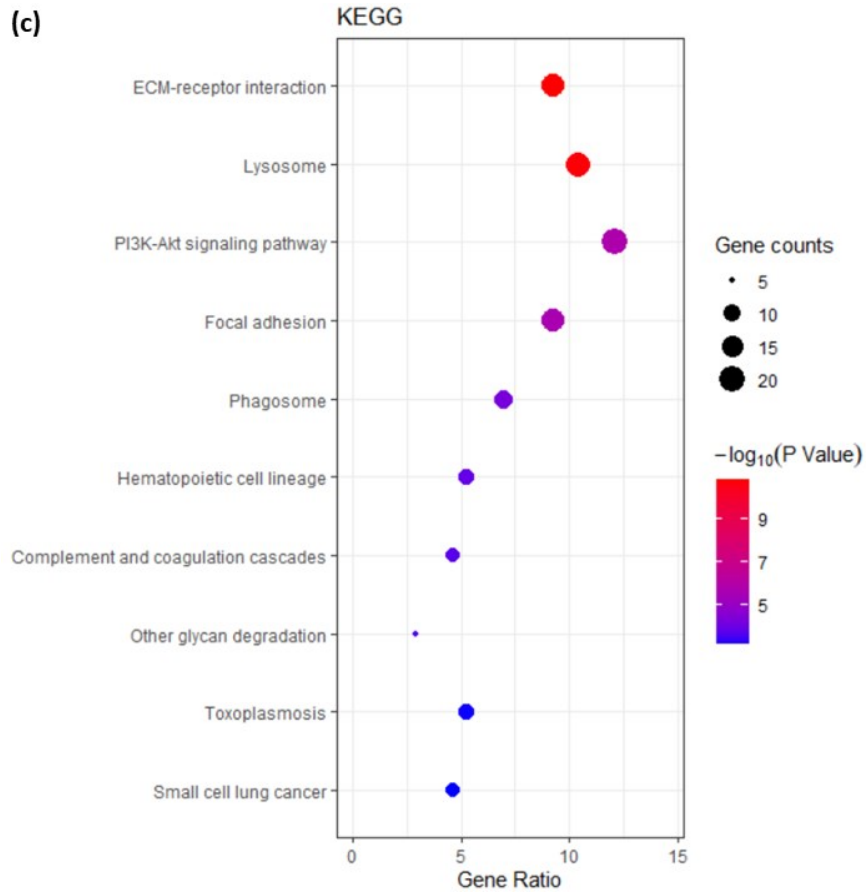

146

147 **Figure S14.** The bubble chart about KEGG pathways of glycoproteins from Hela cells-  
 148 derived exosomes (a), MCF-7 cells-derived exosomes (b) and MDA-MB-231 cells-derived  
 149 exosomes(c). The closer the color is to red, the smaller the corresponding P value, and the  
 150 bigger the bubble, the more protein it contains.

151

**Table S1.** The detailed information of glycopeptides identified from HRP tryptic digest (100 fmol  $\mu\text{L}^{-1}$ ) by  $\text{Fe}_3\text{O}_4@\text{TiO}_2\text{-GSH}$ . N# denotes the N-linked glycosylation site, \* denotes pyroglutamylation on the N-terminal Q. GlcNAc=N-acetylglucosamine, Fuc=fucose, Man=mannose, Xyl=xylose, Hex=hexose, HexNAc=N-acetylhexosamine.

| Number | MH+<br>[Da] | Glycan composition | Amino acid sequence      |
|--------|-------------|--------------------|--------------------------|
| H1     | 1842.6      | XylMan3FucGlcNAc2  | NVGLN#R                  |
| H2     | 2320.1      | Man2GlcNAc2        | MGN#ITPLTGTQGQIR         |
| H3     | 2591.9      | XylMan3FucGlcNAc2  | PTLN#TTYLQTLR            |
| H4     | 2611.9      | XylMan3GlcNAc2     | MGN#ITPLTGTQGQIR         |
| H5     | 2851.1      | FucGlcNAc          | GLIQSDQELFSSPN#ATDTIPLVR |
| H6     | 3048.5      | XylMan2GlcNAc2     | SFAN#STQTFNNAFVEAMDR     |
| H7     | 3089.1      | XylMan3FucGlcNAc2  | GLCPLNGN#LSALVDFDLR      |
| H8     | 3208.0      | XylMan3GlcNAc2     | SFAN#STQTFNNAFVEAMDR     |
| H9     | 3222.0      | Man3FucGlcNAc2     | SFAN#STQTFNNAFVEAMDR     |
| H10    | 3323.1      | XylMan3FucGlcNAc2  | QLTPTFYDN SCPN#VSNIVR    |
| H11    | 3355.1      | XylMan3FucGlcNAc2  | SFAN#STQTFNNAFVEAMDR     |
| H12    | 3369.0      | XylMan3FucGlcNAc2  | SFAN#STQTFNNAFVEAM*DR    |
| H13    | 3509.2      | XylMan2FucGlcNAc2  | GLIQSDQELFSSPN#ATDTIPLVR |
| H14    | 3526.3      | XylMan3GlcNAc2     | GLIQSDQELFSSPN#ATDTIPLVR |

---

|     |        |                                         |                                         |
|-----|--------|-----------------------------------------|-----------------------------------------|
| H15 | 3540.3 | Man3FucGlcNAc2                          | GLIQSDQELFSSPN#ATDTIPLVR                |
| H16 | 3606.3 | XylMan3FucGlcNAc2                       | NQCRGLCPLNGN#LSALVDFDLR                 |
| H17 | 3672.3 | XylMan3FucGlcNAc2                       | GLIQSDQELFSSPN#ATDTIPLVR                |
| H18 | 3894.2 | XylMan3FucGlcNAc2                       | LHFHDCFVNGCDASILLDN#TTSFR               |
| H19 | 4056.1 | XylMan3GlcNAc2                          | QLTPTFYDNSC(AAVESACPR)PN#VSNIVR-<br>H2O |
| H20 | 4223.4 | XylMan3FucGlcNAc2                       | QLTPTFYDNSC(AAVESACPR)PN#VSNIVR         |
| H21 | 4851.7 | Man3FucGlcNAc2,<br>XylMan3FucGlcNAc2    | LYN#FSNTGLPDPTLN#TTYLQTLR               |
| H22 | 4984.8 | XylMan3FucGlcNAc2,<br>XylMan3FucGlcNAc2 | LYN#FSNTGLPDPTLN#TTYLQTLR               |

---

156

157
